# Supplementary material for: Euphopias D–F from Euphorbia L.: quantum chemical calculation-based structure elucidation and their bioactivity of inhibiting NLRP3 inflammasome activation
Source: Royal Society of Chemistry journal article supplement (doi:10.1039/d1qo00396h), 2021-01-01
Supplement: d1qo00396h1.pdf [file d1qo00396h1.pdf]

## Supporting Information

### **Euphopias D–F from *Euphorbia* L.: Quantum Chemical Calculation-Based Structure Elucidation and Their Bioactivity Inhibiting NLRP3 Inflammasome Activation**

Qiang-Qiang Shi,<sup>†a</sup> Yu Zhang,<sup>‡a</sup> Ting-Ting Wang,<sup>‡a</sup> Feng Xiong,<sup>a</sup> Rui-Han Zhang,<sup>a</sup> Xiao-Li Li,<sup>a</sup> Xu Ji,<sup>a</sup> Xing-Jie Zhang,<sup>\*a</sup> Wei-Guang Wang,<sup>\*b</sup> and Wei-Lie Xiao<sup>\*a</sup>

<sup>†</sup>Key Laboratory of Medicinal Chemistry for Natural Resource, Ministry of Education and Yunnan Province, School of Chemical Science and Technology, Yunnan University, Kunming 650091 (China)

<sup>‡</sup>Key Laboratory of Chemistry in Ethnic Medicinal Resources, State Ethnic Affairs Commission and Ministry of Education, Yunnan Minzu University, Kunming 650031 (China)

## Table of Contents

|                                                                           |    |
|---------------------------------------------------------------------------|----|
| <b>Table S1.</b> NMR data of 1–3 (J in Hz, $\delta$ in ppm).....          | 3  |
| <b>Figure S1.</b> Key 2D NMR correlations of 3.....                       | 4  |
| <b>Figure S2.</b> NMR computation of compound 3.....                      | 4  |
| <b>Figure S3.</b> ECD calculation of 3.....                               | 4  |
| <b>Table S2.</b> NMR computed results for compounds 2 and 3.....          | 5  |
| <b>Experimental procedures</b> .....                                      | 6  |
| <b>Computational details of compounds 1–3</b> .....                       | 9  |
| <b>NMR, HRESIMS, IR, UV, CD spectra and OR report of compound 1</b> ..... | 58 |
| <b>NMR, HRESIMS, IR, UV, CD spectra and OR report of compound 2</b> ..... | 69 |
| <b>NMR, HRESIMS, IR, UV, CD spectra and OR report of compound 3</b> ..... | 92 |

**Table S1.** NMR data of **1–3** (J in Hz,  $\delta$  in ppm)

| Pos.   | 1 <sup>a</sup>                              |                                | 2 <sup>a</sup>                             |                                | 2 <sup>b</sup>                             |                                | 2 <sup>c</sup>                             |                                | 3 <sup>a</sup>                 |                                |
|--------|---------------------------------------------|--------------------------------|--------------------------------------------|--------------------------------|--------------------------------------------|--------------------------------|--------------------------------------------|--------------------------------|--------------------------------|--------------------------------|
|        | $\delta_{\text{H}}^{\text{d}}$              | $\delta_{\text{C}}^{\text{e}}$ | $\delta_{\text{H}}^{\text{d}}$             | $\delta_{\text{C}}^{\text{e}}$ | $\delta_{\text{H}}^{\text{f}}$             | $\delta_{\text{C}}^{\text{g}}$ | $\delta_{\text{H}}^{\text{f}}$             | $\delta_{\text{C}}^{\text{g}}$ | $\delta_{\text{H}}^{\text{d}}$ | $\delta_{\text{C}}^{\text{e}}$ |
| 1      | 1.07 dd (13.9, 10.8)<br>2.84 dd (13.9, 7.8) | 37.7 CH <sub>2</sub>           | 1.08 dd (14.8, 8.5)<br>2.81 dd (14.9, 8.7) | 37.2 CH <sub>2</sub>           | 1.04 dd (14.7, 8.3)<br>2.64 dd (14.7, 8.6) | 38.2 CH <sub>2</sub>           | 1.07 dd (14.5, 8.6)<br>2.75 dd (14.5, 8.6) | 37.3 CH <sub>2</sub>           | 1.90 m<br>1.94 m               | 36.3 CH <sub>2</sub>           |
| 2      | 2.12 m                                      | 40.5 CH                        | 2.13 m                                     | 39.7 CH                        | 2.00 m                                     | 41.1 CH                        | 1.92 overlap                               | 39.9 CH                        | 2.09 m                         | 36.3 CH                        |
| 3      | 5.46 dd (7.1, 2.4)                          | 80.1 CH                        | 4.62 dd (5.6, 1.3)                         | 80.7 CH                        | 4.47 dd (5.7, 1.4)                         | 82.2 CH                        | 4.70 d (5.7)                               | 80.9 CH                        | 5.50 dd (5.6, 3.9)             | 78.6 CH                        |
| 4      | 2.29 dd (10.6, 7.2)                         | 46.5 CH                        | 2.01 overlap                               | 45.9 CH                        | 2.04 m                                     | 47.2 CH                        | 2.06 m                                     | 46.3 CH                        | 2.29 dd (11.6, 5.7)            | 46.4 CH                        |
| 5      | 2.73 t (11.5)                               | 35.7 CH                        | 2.42 t (10.8)                              | 36.1 CH                        | 2.39 t (10.9)                              | 37.4 CH                        | 2.43 t (10.8)                              | 36.1 CH                        | 2.90 dd (11.4, 8.5)            | 31.7 CH                        |
| 6      |                                             | 148.0 C                        |                                            | 48.4 C                         |                                            | 49.3 C                         |                                            | 48.4 C                         |                                | 140.5 C                        |
| 7      | 2.45 d (6.4)                                | 52.8 CH                        | 9.18 s                                     | 203.2 CH                       | 9.08 s                                     | 205.2 CH                       | 9.24 s                                     | 203.3 CH                       | 5.04 t (7.7)                   | 121.7 CH                       |
| 8      | 2.54 d (18.7, 6.5)<br>1.96 d (18.8)         | 43.0 CH <sub>2</sub>           |                                            |                                |                                            |                                |                                            |                                | 1.92 m<br>1.55 m               | 25.3 CH <sub>2</sub>           |
| 9      |                                             | 219.3 C                        |                                            |                                |                                            |                                |                                            |                                | 4.18 t (3.9)                   | 77.9 CH                        |
| 10     |                                             | 40.9 C                         |                                            | 131.2 C                        |                                            | 132.4 C                        |                                            | 131.1 C                        |                                | 41.0 C                         |
| 11     | 2.06 s                                      | 56.6 CH                        | 5.49 s                                     | 120.9 CH                       | 5.44 s                                     | 121.8 CH                       | 5.28 s                                     | 121.0 CH                       | 1.23 overlap                   | 47.0 CH                        |
| 12     | 1.74 t (11.7)                               | 40.9 CH                        | 2.01 overlap                               | 36.7 CH                        | 1.98 m                                     | 38.0 CH                        | 1.92 overlap                               | 36.9 CH                        | 3.80 d (3.5)                   | 80.4 CH                        |
| 13     | 1.98 m                                      | 31.5 CH                        | 1.85 m                                     | 34.9 CH                        | 1.80 ddd (11.7, 6.9, 2.6)                  | 36.1 CH                        | 1.82 m                                     | 35.0 CH                        | 2.21 m                         | 44.5 CH                        |
| 14     | 5.97 d (2.6)                                | 71.0 CH                        | 5.99 d (2.5)                               | 71.1 CH                        | 5.88 d (2.4)                               | 72.4 CH                        | 6.18 d (2.3)                               | 71.1 CH                        | 5.06 d (5.9)                   | 79.2 CH                        |
| 15     |                                             | 90.1 C                         |                                            | 91.0 C                         |                                            | 92.3 C                         |                                            | 90.9 C                         |                                | 89.7 C                         |
| 16     | 1.30 d (7.1)                                | 19.8 CH <sub>3</sub>           | 1.20 d (7.2)                               | 20.5 CH <sub>3</sub>           | 1.11 d (7.2)                               | 20.5 CH <sub>3</sub>           | 0.96 d (7.2)                               | 20.1 CH <sub>3</sub>           | 0.94 d (6.5)                   | 13.4 CH <sub>3</sub>           |
| 17     | 4.70 s<br>4.86 s                            | 108.2 CH <sub>2</sub>          | 1.08 s                                     | 13.0 CH <sub>3</sub>           | 0.96 s                                     | 13.3 CH <sub>3</sub>           | 0.90 s                                     | 12.9 CH <sub>3</sub>           | 1.70 s                         | 20.4 CH <sub>3</sub>           |
| 18     | 1.03 s                                      | 21.9 CH <sub>3</sub>           | 1.73 s                                     | 23.7 CH <sub>3</sub>           | 1.63 s                                     | 23.8 CH <sub>3</sub>           | 1.39 s                                     | 23.4 CH <sub>3</sub>           | 0.84 s                         | 27.2 CH <sub>3</sub>           |
| 19     | 1.01 s                                      | 27.8 CH <sub>3</sub>           | 1.41 d (18.1)<br>2.36 d (18.1)             | 36.9 CH <sub>2</sub>           | 1.31 d (17.7)<br>2.31 d (17.7)             | 37.8 CH <sub>2</sub>           | 1.08 d (17.1)<br>2.07 d (17.1)             | 36.7 CH <sub>2</sub>           | 1.01 s                         | 20.6 CH <sub>3</sub>           |
| 20     | 0.96 d (6.7)                                | 15.8 CH <sub>3</sub>           | 1.05 d (6.7)                               | 15.4 CH <sub>3</sub>           | 0.95 d (6.7)                               | 15.8 CH <sub>3</sub>           | 0.79 d (6.7)                               | 15.3 CH <sub>3</sub>           | 0.99 d (7.2)                   | 13.3 CH <sub>3</sub>           |
| OBz-3  |                                             |                                |                                            |                                |                                            |                                |                                            |                                |                                |                                |
| 1'     |                                             | 165.7 C                        |                                            | 165.1 C                        |                                            | 166.7 C                        |                                            | 165.1 C                        |                                | 165.4 C                        |
| 2'     |                                             | 130.6 C                        |                                            | 130.5 C                        |                                            | 131.7 C                        |                                            | 131.1 C                        |                                | 129.8 C                        |
| 3', 7' | 7.95 m                                      | 129.2 CH                       | 8.07 m                                     | 129.4 CH                       | 7.98 m                                     | 130.5 CH                       | 8.12 m                                     | 129.7 CH                       | 7.99 m                         | 129.5 CH                       |
| 4', 6' | 7.44 t (7.6)                                | 128.5 CH                       | 7.46 m                                     | 128.5 CH                       | 7.42 t (7.8)                               | 129.8 CH                       | 7.27 t (7.7)                               | 128.9 CH                       | 7.37 t (7.7)                   | 128.5 CH                       |
| 5'     | 7.56 t (7..4)                               | 133.0 CH                       | 7.57 m                                     | 133.1 CH                       | 7.53 m                                     | 134.5 CH                       | 7.35 t (7.4)                               | 133.3 CH                       | 7.49 m                         | 133.2 CH                       |
| OAc-14 |                                             |                                |                                            |                                |                                            |                                |                                            |                                |                                |                                |
| 1''    |                                             | 169.7 C                        |                                            | 169.7 C                        |                                            | 171.8 C                        |                                            | 169.9 C                        |                                | 171.3 C                        |
| 2''    | 2.13 s                                      | 20.9 CH <sub>3</sub>           | 2.14 s                                     | 20.9 CH <sub>3</sub>           | 2.04 s                                     | 20.8 CH <sub>3</sub>           | 1.89 s                                     | 20.4 CH <sub>3</sub>           | 2.11 s                         | 20.9 CH <sub>3</sub>           |
| OAc-9  |                                             |                                |                                            |                                |                                            |                                |                                            |                                |                                |                                |
| 1'''   |                                             |                                |                                            |                                |                                            |                                |                                            |                                |                                | 170.4 C                        |
| 2'''   |                                             |                                |                                            |                                |                                            |                                |                                            |                                | 1.90 s                         | 21.0 CH <sub>3</sub>           |
| OAc-15 |                                             |                                |                                            |                                |                                            |                                |                                            |                                |                                |                                |
| 1'''   |                                             | 169.3 C                        |                                            | 169.4 C                        |                                            | 171.4 C                        |                                            | 169.6 C                        |                                |                                |
| 2'''   | 2.04 s                                      | 22.2 CH <sub>3</sub>           | 2.07 s                                     | 22.4 CH <sub>3</sub>           | 1.96 s                                     | 22.4 CH <sub>3</sub>           | 1.87 s                                     | 22.0 CH <sub>3</sub>           |                                |                                |

<sup>a</sup>Recorded in CDCl<sub>3</sub>. <sup>b</sup>Recorded in CD<sub>3</sub>OD. <sup>c</sup>Recorded in C<sub>5</sub>D<sub>5</sub>N. <sup>d</sup>400 MHz. <sup>e</sup>100 MHz. <sup>f</sup>600 MHz. <sup>g</sup>150 MHz.

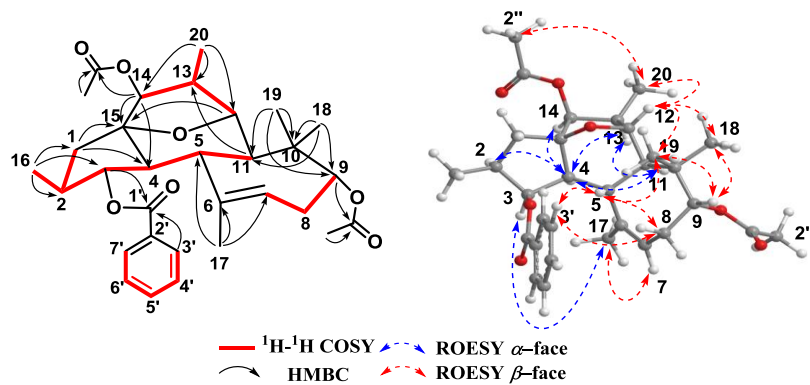

Figure S1. Key 2D NMR correlations of **3**.

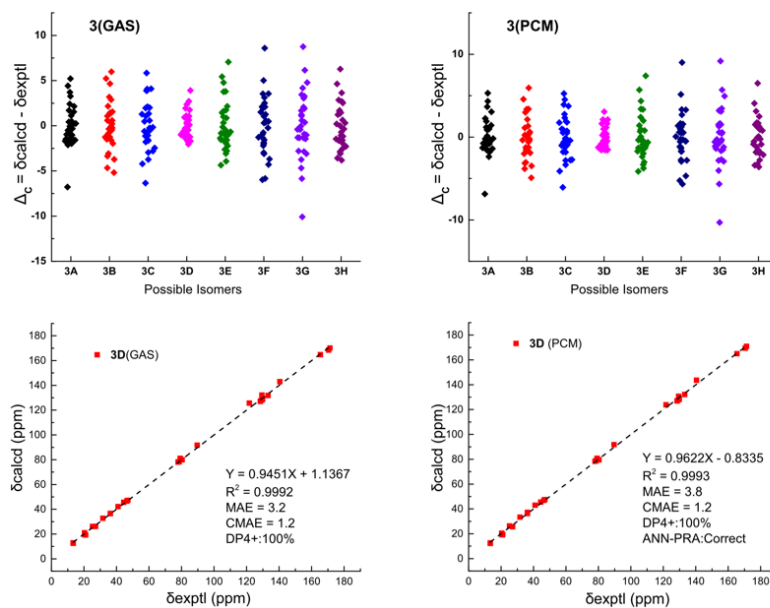

Figure S2. NMR computation of compound **3**.

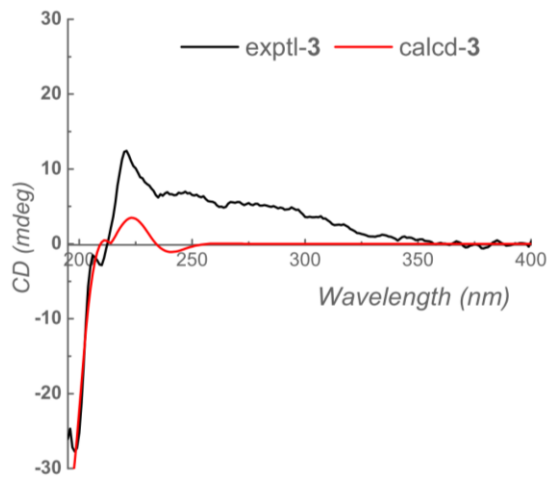

Figure S3. ECD calculation of **3**.

**Table S2.** NMR computed results for compounds **2** and **3**.

| Comp.                                                                                                                                                             | Possible Isomers   | Basis set | Nuclie                 | Equation               | R <sup>2</sup> | MAE  | CMAE | DP4+  | ANN-PRA   |
|-------------------------------------------------------------------------------------------------------------------------------------------------------------------|--------------------|-----------|------------------------|------------------------|----------------|------|------|-------|-----------|
| 2                                                                                                                                                                 | (C-5/19,C-6/12)-2A | a         | C                      | $Y = 0.9305X + 3.4472$ | 0.9974         | 4.2  | 2.4  | 0.00% | Incorrect |
|                                                                                                                                                                   |                    |           | H                      | $Y = 1.015X - 0.0239$  | 0.9783         | 0.27 | 0.26 |       |           |
|                                                                                                                                                                   |                    | b         | C                      | $Y = 0.9515X + 1.3834$ | 0.9976         | 4.0  | 2.3  |       |           |
|                                                                                                                                                                   |                    |           | H                      | $Y = 1.0449X + 0.5193$ | 0.9796         | 0.65 | 0.22 |       |           |
|                                                                                                                                                                   | (C-5/12,C-6/19)-2B | a         | C                      | $Y = 0.9429X + 1.2182$ | 0.9994         | 3.7  | 1.1  | 100%  | Correct   |
|                                                                                                                                                                   |                    |           | H                      | $Y = 1.0237X - 0.0995$ | 0.9907         | 0.18 | 0.17 |       |           |
| b                                                                                                                                                                 |                    | C         | $Y = 0.9648X - 0.881$  | 0.9994                 | 3.9            | 1.1  |      |       |           |
|                                                                                                                                                                   |                    | H         | $Y = 1.0553X + 0.3864$ | 0.9936                 | 0.55           | 0.14 |      |       |           |
| 3                                                                                                                                                                 | (5S9S11R)-3A       | a         | C                      | $Y = 0.9476X + 1.0201$ | 0.9980         | 3.5  | 1.7  | 0.00% | Incorrect |
|                                                                                                                                                                   |                    |           | H                      | $Y = 1.0228X - 0.116$  | 0.9871         | 0.20 | 0.19 |       |           |
|                                                                                                                                                                   |                    | c         | C                      | $Y = 0.9649X - 0.9534$ | 0.9981         | 4.0  | 1.7  |       |           |
|                                                                                                                                                                   |                    |           | H                      | $Y = 1.0619X + 0.3311$ | 0.9887         | 0.50 | 0.20 |       |           |
|                                                                                                                                                                   | (5S9S11S)-3B       | a         | C                      | $Y = 0.9361X + 2.5303$ | 0.9974         | 3.7  | 2.0  | 0.00% | Incorrect |
|                                                                                                                                                                   |                    |           | H                      | $Y = 1.0276X - 0.0477$ | 0.9738         | 0.30 | 0.30 |       |           |
|                                                                                                                                                                   |                    | c         | C                      | $Y = 0.951X + 0.7786$  | 0.9977         | 3.8  | 1.9  |       |           |
|                                                                                                                                                                   |                    |           | H                      | $Y = 1.0669X + 0.3886$ | 0.9796         | 0.60 | 0.20 |       |           |
|                                                                                                                                                                   | (5S9R11S)-3C       | a         | C                      | $Y = 0.927X + 3.6835$  | 0.9974         | 3.9  | 2.1  | 0.00% | Incorrect |
|                                                                                                                                                                   |                    |           | H                      | $Y = 1.0205X - 0.0098$ | 0.9720         | 0.30 | 0.30 |       |           |
|                                                                                                                                                                   |                    | c         | C                      | $Y = 0.9428X + 1.8547$ | 0.9976         | 3.9  | 2.0  |       |           |
|                                                                                                                                                                   |                    |           | H                      | $Y = 1.0598X + 0.4289$ | 0.9745         | 0.60 | 0.30 |       |           |
|                                                                                                                                                                   | (5S9R11R)-3D       | a         | C                      | $Y = 0.9451X + 1.1367$ | 0.9992         | 3.2  | 1.2  | 100%  | Correct   |
|                                                                                                                                                                   |                    |           | H                      | $Y = 1.0153X - 0.0818$ | 0.9898         | 0.20 | 0.20 |       |           |
|                                                                                                                                                                   |                    | c         | C                      | $Y = 0.9622X - 0.8335$ | 0.9993         | 3.8  | 1.2  |       |           |
|                                                                                                                                                                   |                    |           | H                      | $Y = 1.0558X + 0.3555$ | 0.9918         | 0.50 | 0.10 |       |           |
|                                                                                                                                                                   | (5R9S11R)-3E       | a         | C                      | $Y = 0.9232X + 3.9661$ | 0.9973         | 4.2  | 2.2  | 0.00% | Incorrect |
|                                                                                                                                                                   |                    |           | H                      | $Y = 1.0182X - 0.0468$ | 0.9765         | 0.30 | 0.30 |       |           |
|                                                                                                                                                                   |                    | c         | C                      | $Y = 0.9395X + 2.0665$ | 0.9974         | 4.2  | 2.1  |       |           |
|                                                                                                                                                                   |                    |           | H                      | $Y = 1.0549X + 0.3859$ | 0.9803         | 0.60 | 0.20 |       |           |
|                                                                                                                                                                   | (5R9S11S)-3F       | a         | C                      | $Y = 0.9355X + 2.4288$ | 0.9965         | 4.1  | 2.5  | 0.00% | Incorrect |
|                                                                                                                                                                   |                    |           | H                      | $Y = 1.0253X - 0.0994$ | 0.9672         | 0.30 | 0.30 |       |           |
|                                                                                                                                                                   |                    | c         | C                      | $Y = 0.9521X + 0.5352$ | 0.9968         | 4.0  | 2.2  |       |           |
|                                                                                                                                                                   |                    |           | H                      | $Y = 1.0641X + 0.3399$ | 0.9737         | 0.50 | 0.20 |       |           |
|                                                                                                                                                                   | (5R9R11S)-3G       | a         | C                      | $Y = 0.9355X + 2.4374$ | 0.9951         | 4.4  | 2.7  | 0.00% | Incorrect |
|                                                                                                                                                                   |                    |           | H                      | $Y = 1.0189X - 0.0742$ | 0.9739         | 0.30 | 0.20 |       |           |
|                                                                                                                                                                   |                    | c         | C                      | $Y = 0.9523X + 0.5187$ | 0.9955         | 4.3  | 2.5  |       |           |
|                                                                                                                                                                   |                    |           | H                      | $Y = 1.0569X + 0.3699$ | 0.9774         | 0.50 | 0.20 |       |           |
|                                                                                                                                                                   | (5R9R11R)-3H       | a         | C                      | $Y = 0.9287X + 3.3127$ | 0.9978         | 3.8  | 2.0  | 0.00% | Incorrect |
|                                                                                                                                                                   |                    |           | H                      | $Y = 1.0157X - 0.061$  | 0.9869         | 0.20 | 0.20 |       |           |
| c                                                                                                                                                                 |                    | C         | $Y = 0.9456X + 1.3659$ | 0.9981                 | 3.8            | 1.8  |      |       |           |
|                                                                                                                                                                   |                    | H         | $Y = 1.0531X + 0.382$  | 0.9897                 | 0.50           | 0.20 |      |       |           |
| a mPW1PW91/6-31G**/ B3LYP/6-31G* (in gas phase). b mPW1PW91/6-31G**//B3LYP/6-31G* levels (in methanol)<br>c mPW1PW91/6-31G**//B3LYP/6-31G* levels (in chloroform) |                    |           |                        |                        |                |      |      |       |           |

## Experimental procedures

### General experimental procedures

A Hitachi U-4100 UV-visible spectrophotometer was employed to obtain ultraviolet (UV) spectra. Optical rotations were measured on a Rudolph Autopol VI polarimeter. Circular dichroism (CD) spectra was recorded on an Applied Photophysics V100 Chirascan instrument. Infrared (IR) spectra was obtained with a Nicolet iS10 FT-IR spectrometer. BRUKER Ascend™ 400 and 600 MHz NMR instruments were used to check 1D and 2D NMR spectra. HRESIMS data were obtained from Thermo Fisher LTQ Orbitrap XL hybrid ion trap mass spectrometer. Column chromatography (CC) were performed on Macroporous resin (D-101, Tianjin Haoju Science and Technology Ltd.), Silica gel (100–200; 200–300 mesh, Qingdao Marine Chemical, Ltd.), and MCI gel CHP 20P (75–150  $\mu\text{m}$ , Mitsubishi Chemical Industries, Tokyo, Japan). Preparative HPLC was performed on Agilent 1260 Infinity II Preparative liquid chromatography system equipped with an automatic fraction collector. And the columns used were Megres RP C-18 column (10  $\mu\text{m}$ , 30 mm  $\times$  250 mm, 20 ml/min) and CAPCELL PAK-C18 column (5  $\mu\text{m}$ , 20 mm  $\times$  250 mm, 10 ml/min). TLC was performed on pre-coated TLC plates (200–300  $\mu\text{m}$  thickness, silica gel 60 F254, Qingdao Marine Chemical Inc.), with spots visualized under UV light (254 and 365 nm) and heated after spraying with 10% aqueous  $\text{H}_2\text{SO}_4$ .

### Plant Materials

The samples of *Euphorbia helioscopia* L. were purchased from Bozhou Materia Medica Market in Anhui Province, P. R. China, in September 2019, and authenticate by Pro. Xiwen Li (Kunming Institute of Botany). A voucher specimen (XWL20190926) was maintained in Key Laboratory of Medicinal Chemistry for Natural Resources, Ministry of Education, Yunnan University.

### Extraction and Isolation

The air-dried powder of the whole plant of *E. helioscopia* (20 kg) were extracted with 90% aqueous methanol (100 L) under reflux condition three times at 60°C heating by water bath. The methanol extracts were evaporated in vacuum to afford the crude extract (3 kg). The crude extracts was suspended in  $\text{H}_2\text{O}$  and partitioned with ethyl acetate (3  $\times$  10 L, EtOAc) to afford an EtOAc-soluble extract. The EtOAc extracts (260 g) was fractioned by using D-101 macroporous resin column eluted MeOH/ $\text{H}_2\text{O}$  (30%–100%, v/v) to give five parts (Fr.1–Fr.5), Fr.4 (40 g) was subjected to a column chromatography (CC) over silica gel (100–200 mesh) with PE/EtOAc gradient elution system (1:0, 9:1, 4:1, 3:1, 1:1, and 0:1, v/v) to give six subfractions Fr.4.1–4.6.

Fr.4.2 (PE/EtOAc 9:1, 8 g) was chromatographed on a MCI with a MeOH/ $\text{H}_2\text{O}$  gradient elution system (60:40, 70:30, 80:20, 90:10, and 100:0, v/v) to afford five fractions Fr.4.2.1–4.2.5. Fr.4.2.4 (2.5 g) was further separated by a silica gel CC (200–300 mesh) eluted with PE/Acetone (gradient system, 20:1, 10:1, 5:1, and 2:1 v/v) to obtain four fractions Fr.4.2.4.1–Fr.4.2.4.4. Then Fr.4.2.4.1 (1.2 g) was subjected on a preparative HPLC equipped with Megres RP C-18 column (10  $\mu\text{m}$ , 30 mm  $\times$  250 mm, 20 ml/min) eluted with MeCN/ $\text{H}_2\text{O}$  (90:10, v/v) to obtain 7 fractions Fr.4.2.4.1.1–Fr.4.2.4.1.7. Compound **1** (10.4 mg, 5.2  $\times$  10<sup>-5</sup> % yield) was obtained from Fr.4.2.4.1.5 by recrystallization. Fr.4.2.4.1.4 was further purified by preparative HPLC equipped with CAPCELL PAK-C18 column (5  $\mu\text{m}$ , 20 mm  $\times$  250 mm, 10 ml/min) eluted with MeCN/ $\text{H}_2\text{O}$  (90:10, v/v) to give compound **2** (12.4 mg,  $t_R$  = 15.4 min, 9.2  $\times$  10<sup>-5</sup> % yield). Fr.4.2.4.1.7 and Fr.4.2.4.1.6 were separated by preparative HPLC equipped with CAPCELL PAK-C18 column (5  $\mu\text{m}$ , 20 mm  $\times$  250 mm, 10 ml/min) eluted with MeCN/ $\text{H}_2\text{O}$  (90:10, v/v) to yield compound **3** (10.5 mg,  $t_R$  = 23.5 min, 5.25  $\times$  10<sup>-5</sup> % yield).

### Physical Constants And Spectroscopic Data of Compounds 1–3.

*Euphorbia D (1)*: Colorless crystals (MeOH); mp: 227–231°C;  $[\alpha]_D^{24}$  –12.36 (c 0.10, MeOH); ECD (MeOH)  $\lambda_{\text{max}}$  ( $\Delta\epsilon$ ): 198 (-16.28), 229 (-9.21), and 301 (3.42) nm; UV (MeOH)  $\lambda_{\text{max}}$  (log  $\epsilon$ ): 195 (3.71) and 230 (3.11); IR (KBr)  $\nu_{\text{max}}$ : 3451, 2989, 2959, 2936, 1749, 1737, 1713, 1370, 1278, 1233, 1210, 1117, 1025, 714  $\text{cm}^{-1}$ ; HRMS (ESI)  $m/z$ :  $[\text{M} + \text{Na}]^+$  Calcd for  $\text{C}_{31}\text{H}_{38}\text{O}_7\text{Na}$  545.2510; Found 545.2510.

*Euphopia E (2)*: White powder;  $[\alpha]_D^{24}$   $-13.36$  (c 0.10, MeOH); ECD (MeOH)  $\lambda_{\max}$  ( $\Delta\epsilon$ ): 232 (-2.38) and 229 (-0.47) nm; UV (MeOH)  $\lambda_{\max}$  ( $\log \epsilon$ ): 195 (3.76) and 230 (3.21); IR (KBr)  $\nu_{\max}$ : 3428, 2966, 2936, 2879, 1749, 1728, 1452, 1374, 1277, 1228, 1113, 1025, 714  $\text{cm}^{-1}$ ; HRMS (ESI)  $m/z$ :  $[M + Na]^+$  Calcd for  $\text{C}_{29}\text{H}_{38}\text{O}_7\text{Na}$  519.2353; Found 519.2357.

*Euphopia F (3)*: White powder;  $[\alpha]_D^{24}$   $+6.36$  (c 0.11, MeOH); ECD (MeOH)  $\lambda_{\max}$  ( $\Delta\epsilon$ ): 198 (-2.31) and 221 (1.04) nm; UV (MeOH)  $\lambda_{\max}$  ( $\log \epsilon$ ): 195 (3.42) and 229 (2.81); IR (KBr)  $\nu_{\max}$ : 3429, 2966, 2932, 2877, 1728, 1453, 1373, 1271, 1247, 1109, 1027, 712  $\text{cm}^{-1}$ ; HRMS (ESI)  $m/z$ :  $[M + Na]^+$  Calcd for  $\text{C}_{31}\text{H}_{40}\text{O}_7\text{Na}$  547.2666; Found 547.2667.

Crystal data for euphopia D (**1**):  $\text{C}_{31}\text{H}_{38}\text{O}_7 \cdot \text{CH}_4\text{O}$ ,  $M = 554.65$ ,  $a = 8.1554(2)$  Å,  $b = 18.3869(4)$  Å,  $c = 19.8665(4)$  Å,  $\alpha = 90^\circ$ ,  $\beta = 90^\circ$ ,  $\gamma = 90^\circ$ ,  $V = 2979.03(11)$  Å<sup>3</sup>,  $T = 100.(2)$  K, space group  $P212121$ ,  $Z = 4$ ,  $\mu(\text{Cu K}\alpha) = 0.717$   $\text{mm}^{-1}$ , 33939 reflections measured, 5864 independent reflections ( $R_{\text{int}} = 0.0272$ ). The final  $R_1$  values were 0.0327 ( $I > 2\sigma(I)$ ). The final  $wR(F^2)$  values were 0.0900 ( $I > 2\sigma(I)$ ). The final  $R_1$  values were 0.0329 (all data). The final  $wR(F^2)$  values were 0.0902 (all data). The goodness of fit on  $F^2$  was 1.099. Flack parameter = 0.03(3). Crystallographic data for **1** has been deposited at the Cambridge Crystallographic Data Center (<https://ccdc.cam.ac.uk>) with the deposition number of 2039968.

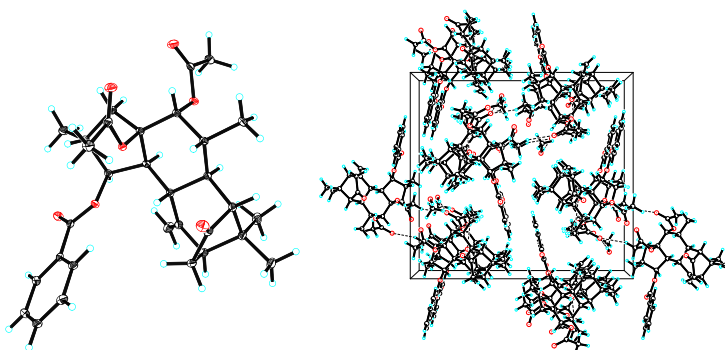

**Figure S4.** ORTEP drawing of euphopia D (**1**) at the 30% probability levels.

### Quantum Chemistry Calculations.

All theoretical calculations were performed using Gaussian 09<sup>1</sup>. Conformation search was initially performed using the program Spartan'14. The conformers were optimized at B3LYP/6-31G\* level of theory in gas phase. Room-temperature equilibrium populations were calculated according to Boltzmann distribution law.

NMR calculation of **2** and **3** were calculated with the GIAO method<sup>2</sup> at mPW1PW91/6-31G\*\*//B3LYP/6-31G\* (in gas phase) and mPW1PW91/6-31G\*\*//B3LYP/6-31G\* levels (in solvent with PCM model). The shielding constants (including <sup>13</sup>C and <sup>1</sup>H) obtained were directly performed statistical analyses with experimental chemical shifts by using DP4+<sup>3</sup> probability and ANN-PRA<sup>4</sup> analyses.

The theoretical calculation of ECD of compounds **1–3** was performed using time-dependent Density Functional Theory (TDDFT)<sup>5</sup> at wB97XD/6-311+G\*\*//B3LYP/6-31G\* level in MeOH with PCM model. The ECD spectra were obtained by weighing the Boltzmann distribution rate of each geometric conformation. The sigma/gamma value for processing calculated ECD was 0.3 eV.<sup>6</sup>

### NLRP3 Inflammasome Activation.

J774A.1 macrophages were incubated with gradient concentrations of compounds for 30 min followed by 100 ng/mL lipopolysaccharide (LPS) for 4 h. Next, cells were treated with the NLRP3 stimulus Nigericin (10 μM) for 1 h. The supernatant was collected for LDH release assay and IL-1β/Casp-1 western blot detection. LDH release level was determined according to the manufacturer's manual (Promega, USA). IL-1β levels were detected by mouse IL-1 beta/IL-1F2 DuoSet ELISA kit (R&D Incorporation, USA) according to the manufacturer's manual. Western blot assays were used to detect GSDMD full length (FL) and N-terminal (NT) from cell lysate as well as IL-1β (p17) and Casp-1 (p20) from supernatant.

### Pyroptosis Assay.

After inflammasome stimulation, cells were stained by PI (0.5 μg/mL; ThermoFisher, USA) for 15 min at room temperature. Fluorescent images were immediately observed by an Axio Observer 3 inverted fluorescent microscope (Zeiss, Germany). Pyroptotic cells were counted by FACSCelestat™ Flow Cytometer (BD, USA).

### Cytotoxicity Assay.

Cell viability was performed by MTT methods see previous report.<sup>7</sup>

### References

- (1) Gaussian 09, Revision C.01, M. J. Frisch, G. W. Trucks, H. B. Schlegel, G. E. Scuseria, M. A. Robb, J. R. Cheeseman, G. Scalmani, V. Barone, B. Mennucci, G. A. Petersson, H. Nakatsuji, M. Caricato, X. Li, H. P. Hratchian, A. F. Izmaylov, J. Bloino, G. Zheng, J. L. Sonnenberg, M. Hada, M. Ehara, K. Toyota, R. Fukuda, J. Hasegawa, M. Ishida, T. Nakajima, Y. Honda, O. Kitao, H. Nakai, T. Vreven, J. A. Montgomery, Jr., J. E. Peralta, F. Ogliaro, M. Bearpark, J. J. Heyd, E. Brothers, K. N. Kudin, V. N. Staroverov, T. Keith, R. Kobayashi, J. Normand, K. Raghavachari, A. Rendell, J. C. Burant, S. S. Iyengar, J. Tomasi, M. Cossi, N. Rega, J. M. Millam, M. Klene, J. E. Knox, J. B. Cross, V. Bakken, C. Adamo, J. Jaramillo, R. Gomperts, R. E. Stratmann, O. Yazyev, A. J. Austin, R. Cammi, C. Pomelli, J. W. Ochterski, R. L. Martin, K. Morokuma, V. G. Zakrzewski, G. A. Voth, P. Salvador, J. J. Dannenberg, S. Dapprich, A. D. Daniels, O. Farkas, J. B. Foresman, J. V. Ortiz, J. Cioslowski, and D. J. Fox, Gaussian, Inc., Wallingford CT, **2010**.
- (2) Lodewyk, M. W.; Siebert, M. R.; Tantillo, D. *J. Chem. Rev.* **2012**, 112, 1839.
- (3) Grimblat, N.; Zanardi, M. M.; Sarotti, A. M. *J. Org. Chem.* **2015**, 80, 12526.
- (4) Zanardi, M. M.; Sarotti, A. M. *J. Org. Chem.* **2015**, 80, 9371.
- (5) Srebro-Hooper, M.; Autschbach, *J. Annu. Rev. Phys. Chem.* **2017**, 68, 399.
- (6) Bruhn, T.; Schaumlöffel, A.; Hemberger, Y., SpecDis, Version 1.64, University of Wuerzburg, **2015**.
- (7) Zhang, X. J.; Lu, L. H.; Wang, R. R.; Wang, Y. P.; Luo, R. H.; Cong Lai, C.; Yang, L. M.; He, Y. P.; Zheng, Y. T., *PLoS one* **2013**, 8 (11), e81489.



## Computational details of compounds 1–3

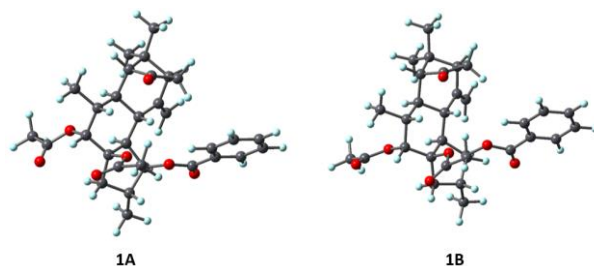

**Figure S5.** Key conformers of **1**.

**Table S3.** Important thermodynamic parameters and Boltzmann distributions of the optimized **1** at B3LYP/6-31G\* level in the gas phase.

| Conformations | Energy (a.u) | $\Delta G(\text{kcal/mol})$ | %      | Number of imaginary frequencies |
|---------------|--------------|-----------------------------|--------|---------------------------------|
| <b>1A</b>     | -1728.832521 | 0                           | 50.21% | 0                               |
| <b>1B</b>     | -1728.832513 | 0.005082774                 | 49.79% | 0                               |

**Table S4.** Optimized Z-matrixes of **1** in the gas phase (Å) at B3LYP/6-31G\* level

| <b>1A</b> |         |         |         | <b>1B</b> |         |         |         |
|-----------|---------|---------|---------|-----------|---------|---------|---------|
| C         | -2.693  | 1.8629  | 0.1981  | C         | -2.5599 | 2.0888  | -0.205  |
| C         | -2.1167 | 0.4534  | 0.4868  | C         | -2.1325 | 0.6735  | 0.2619  |
| C         | -1.0615 | 0.2098  | -0.6178 | C         | -1.0074 | 0.2503  | -0.7097 |
| C         | -0.5831 | 1.656   | -0.9503 | C         | -0.368  | 1.619   | -1.0959 |
| C         | -1.9352 | 2.3688  | -1.0435 | C         | -1.6346 | 2.4299  | -1.3885 |
| C         | -4.1979 | 1.8468  | -0.0403 | C         | -4.0262 | 2.1553  | -0.6145 |
| H         | -1.5941 | -0.2032 | -1.4874 | H         | -1.495  | -0.1855 | -1.5944 |
| C         | 0.1506  | -0.6997 | -0.3043 | C         | 0.0817  | -0.7312 | -0.2174 |
| C         | 1.1488  | -0.6937 | -1.53   | C         | 1.1781  | -0.9097 | -1.3434 |
| C         | 1.5647  | 0.7539  | -1.9373 | C         | 1.7632  | 0.4594  | -1.8111 |
| C         | 0.31    | 1.6374  | -2.2083 | C         | 0.6275  | 1.4269  | -2.2585 |
| C         | -0.0778 | -2.1543 | 0.144   | C         | -0.3203 | -2.1198 | 0.311   |
| C         | 1.2101  | -2.9857 | 0.31    | C         | 0.8644  | -3.0449 | 0.6542  |
| C         | 1.9138  | -3.1177 | -1.0652 | C         | 1.6668  | -3.3472 | -0.6374 |
| C         | 2.3582  | -1.6405 | -1.263  | C         | 2.2646  | -1.9355 | -0.8983 |
| C         | 2.4769  | 0.7676  | -3.1724 | C         | 2.7886  | 0.2951  | -2.9406 |
| C         | -1.2643 | -2.7523 | 0.3384  | C         | -1.5697 | -2.5956 | 0.4368  |
| C         | 2.8973  | -1.3473 | 0.1363  | C         | 2.7074  | -1.5803 | 0.5204  |
| C         | 2.2445  | -2.238  | 1.1786  | C         | 1.8866  | -2.3241 | 1.5588  |
| O         | 3.7167  | -0.4757 | 0.3936  | O         | 3.5803  | -0.7662 | 0.7898  |
| H         | 0.6087  | -1.0961 | -2.3965 | H         | 0.6792  | -1.3287 | -2.2266 |
| H         | 0.6634  | -0.219  | 0.5386  | H         | 0.5618  | -0.2302 | 0.6329  |
| C         | 1.0105  | -3.6754 | -2.182  | C         | 0.8134  | -3.9099 | -1.7903 |
| C         | 3.1419  | -4.0621 | -1.0049 | C         | 2.7901  | -4.3884 | -0.3968 |
| O         | -1.4747 | 0.444   | 1.7718  | O         | -1.6098 | 0.735   | 1.5984  |
| C         | -2.2534 | 0.1443  | 2.8373  | C         | -2.5062 | 0.6194  | 2.6058  |
| C         | 0.0143  | 0.1277  | 6.4761  | C         | -0.582  | 0.7602  | 6.4348  |
| C         | 0.6645  | 0.3891  | 5.2704  | C         | 0.1963  | 0.824   | 5.2795  |
| C         | -0.057  | 0.4003  | 4.0746  | C         | -0.4118 | 0.7807  | 4.0229  |
| C         | -1.4369 | 0.1485  | 4.0815  | C         | -1.8065 | 0.6728  | 3.9182  |
| C         | -2.082  | -0.1141 | 5.2975  | C         | -2.5808 | 0.6081  | 5.0843  |
| C         | -1.3572 | -0.1238 | 6.4909  | C         | -1.969  | 0.6523  | 6.3386  |
| O         | -3.4486 | -0.0993 | 2.8072  | O         | -3.7129 | 0.4892  | 2.4813  |
| O         | 0.163   | 2.1423  | 0.2079  | O         | 0.3101  | 2.1379  | 0.0876  |
| O         | 0.4975  | 4.2517  | -0.6347 | O         | 0.8527  | 4.1553  | -0.8646 |
| C         | 0.6261  | 3.4181  | 0.2468  | C         | 0.86    | 3.3796  | 0.0777  |
| C         | 1.3314  | 3.6586  | 1.5461  | C         | 1.4833  | 3.6664  | 1.409   |
| O         | -0.3966 | 1.067   | -3.3358 | O         | -0.0743 | 0.8568  | -3.389  |
| O         | -0.8878 | 3.1506  | -4.1745 | O         | 0.8429  | 2.3856  | -4.8448 |
| C         | -0.9181 | 1.9325  | -4.2462 | C         | 0.1137  | 1.4363  | -4.6054 |
| C         | -1.5645 | 1.1668  | -5.3595 | C         | -0.7094 | 0.7242  | -5.6348 |
| H         | -2.4867 | 2.5332  | 1.0428  | H         | -2.3945 | 2.8156  | 0.6009  |

|   |         |         |         |   |         |         |         |
|---|---------|---------|---------|---|---------|---------|---------|
| H | -2.898  | -0.3113 | 0.4429  | H | -2.9687 | -0.03   | 0.2113  |
| H | -1.8605 | 3.4595  | -1.0245 | H | -1.4684 | 3.5091  | -1.4389 |
| H | -2.4712 | 2.0871  | -1.9568 | H | -2.089  | 2.1217  | -2.338  |
| H | -4.5608 | 2.8505  | -0.2845 | H | -4.2802 | 3.1561  | -0.979  |
| H | -4.7282 | 1.5052  | 0.8542  | H | -4.6767 | 1.9317  | 0.2369  |
| H | -4.4653 | 1.1793  | -0.8665 | H | -4.2527 | 1.4371  | -1.4098 |
| H | 2.1329  | 1.2032  | -1.1135 | H | 2.2917  | 0.9205  | -0.9674 |
| H | 0.6621  | 2.6449  | -2.4534 | H | 1.0743  | 2.3896  | -2.5254 |
| H | 0.9906  | -3.9668 | 0.7476  | H | 0.5168  | -3.9651 | 1.1387  |
| H | 3.1492  | -1.5752 | -2.0126 | H | 3.1194  | -2.0011 | -1.5741 |
| H | 2.6313  | 1.7915  | -3.5301 | H | 3.0752  | 1.2695  | -3.3505 |
| H | 3.4664  | 0.3635  | -2.9395 | H | 3.7083  | -0.1722 | -2.5763 |
| H | 2.0534  | 0.1813  | -3.9944 | H | 2.3959  | -0.3185 | -3.7577 |
| H | -1.3266 | -3.7956 | 0.6386  | H | -1.7544 | -3.6025 | 0.8037  |
| H | -2.2161 | -2.2617 | 0.1931  | H | -2.4558 | -2.0385 | 0.1686  |
| H | 1.7901  | -1.6483 | 1.9786  | H | 1.4233  | -1.6348 | 2.2691  |
| H | 2.9929  | -2.9174 | 1.5953  | H | 2.5291  | -3.0312 | 2.0905  |
| H | 1.5242  | -3.6328 | -3.1493 | H | 1.4098  | -3.9906 | -2.7064 |
| H | 0.7578  | -4.7237 | -1.9839 | H | 0.4454  | -4.9124 | -1.5419 |
| H | 0.0624  | -3.1455 | -2.2996 | H | -0.0659 | -3.3088 | -2.0331 |
| H | 2.8381  | -5.072  | -0.7069 | H | 2.3675  | -5.3409 | -0.0572 |
| H | 3.6216  | -4.1329 | -1.9882 | H | 3.3433  | -4.5791 | -1.324  |
| H | 3.9149  | -3.7339 | -0.3042 | H | 3.528   | -4.0752 | 0.3473  |
| H | 0.5775  | 0.12    | 7.4063  | H | -0.1068 | 0.7945  | 7.4124  |
| H | 1.7343  | 0.5844  | 5.2611  | H | 1.2779  | 0.9072  | 5.3568  |
| H | 0.4707  | 0.6056  | 3.1465  | H | 0.2148  | 0.8306  | 3.1359  |
| H | -3.1522 | -0.3119 | 5.3194  | H | -3.6641 | 0.5234  | 5.0197  |
| H | -1.8633 | -0.3272 | 7.4315  | H | -2.575  | 0.6025  | 7.24    |
| H | 0.6313  | 3.5322  | 2.3758  | H | 0.7144  | 3.662   | 2.1857  |
| H | 2.1728  | 2.9679  | 1.644   | H | 2.2533  | 2.9214  | 1.6256  |
| H | 1.7163  | 4.6821  | 1.566   | H | 1.952   | 4.6542  | 1.385   |
| H | -0.8288 | 0.5147  | -5.8371 | H | -0.3856 | -0.3168 | -5.7121 |
| H | -2.4014 | 0.5825  | -4.969  | H | -1.7675 | 0.7797  | -5.3664 |
| H | -1.9445 | 1.8673  | -6.1086 | H | -0.5717 | 1.2066  | -6.6067 |

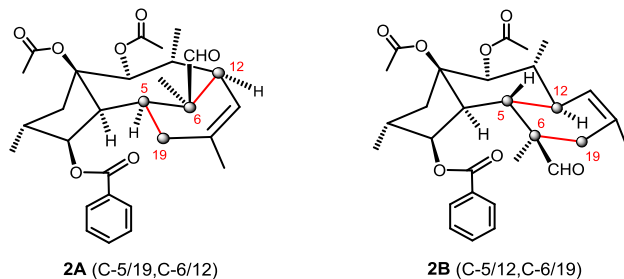

**Figure S6.** Possible isomers **2A** and **2B** for compound **2**.

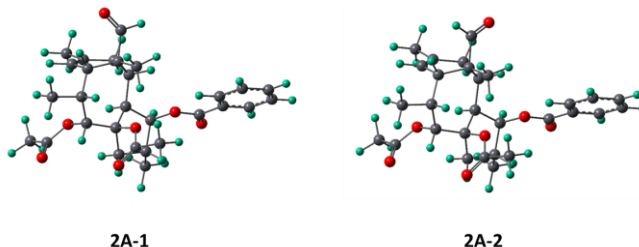

**Figure S7.** Key conformers of isomer **2A**.

**Table S5.** Important thermodynamic parameters and Boltzmann distributions of the optimized isomer **2A** at B3LYP/6-31G\* level in the gas phase.

| Conformations | Energy (a.u) | $\Delta G$ (kcal/mol) | %      | Number of imaginary frequencies |
|---------------|--------------|-----------------------|--------|---------------------------------|
| <b>2A-1</b>   | -1653.351334 | 0                     | 57.41% | 0                               |
| <b>2A-2</b>   | -1653.351052 | 0.176918168           | 42.59% | 0                               |

**Table S6.** Optimized Z-matrixes of isomer **2A** in the gas phase (Å) at B3LYP/6-31G\* level.

| <b>2A-1</b> |         |         | <b>2A-2</b> |   |         |         |         |
|-------------|---------|---------|-------------|---|---------|---------|---------|
| C           | -0.4437 | -2.4981 | 1.0751      | C | -0.7008 | -2.5913 | 0.6581  |
| C           | -0.8878 | -1.0492 | 1.3708      | C | -1.0109 | -1.1727 | 1.1817  |
| C           | 0.2592  | -0.1578 | 0.8188      | C | 0.2268  | -0.3203 | 0.7894  |
| C           | 0.8047  | -0.9692 | -0.3833     | C | 0.7225  | -0.9811 | -0.5229 |
| C           | 0.8694  | -2.3703 | 0.284       | C | 0.6438  | -2.4682 | -0.0803 |
| C           | -0.1379 | 1.3554  | 0.7323      | C | -0.025  | 1.218   | 0.9487  |
| C           | 2.2273  | 0.8665  | -1.6127     | C | 2.3221  | 0.8904  | -1.4383 |
| C           | 2.2076  | -0.4901 | -0.8568     | C | 2.1705  | -0.5618 | -0.9067 |
| C           | -0.2443 | -3.3191 | 2.3439      | C | -0.6245 | -3.6238 | 1.7764  |
| C           | 1.7261  | 2.1304  | -0.8397     | C | 1.9244  | 2.0588  | -0.4762 |
| C           | 3.6404  | 1.1259  | -2.1794     | C | 3.7625  | 1.1041  | -1.9533 |
| H           | 1.0424  | -0.2376 | 1.5884      | H | 0.9811  | -0.5968 | 1.5425  |
| O           | -0.1997 | -1.0015 | -1.4243     | O | -0.2576 | -0.7626 | -1.5659 |
| C           | 0.1977  | 2.1828  | -0.5463     | C | 0.4023  | 2.2033  | -0.1833 |
| C           | -0.6902 | 1.896   | -1.7694     | C | -0.5022 | 2.1816  | -1.4278 |
| C           | -0.0421 | -1.7884 | -2.5218     | C | -0.1395 | -1.3834 | -2.771  |
| O           | 0.9544  | -2.4346 | -2.8023     | O | 0.7959  | -2.0797 | -3.1299 |
| C           | -1.2821 | -1.7455 | -3.362      | C | -1.3431 | -1.0929 | -3.615  |
| O           | 3.0942  | -0.4233 | 0.289       | O | 3.0376  | -0.756  | 0.239   |
| C           | 4.2758  | -1.0925 | 0.237       | C | 4.1464  | -1.5275 | 0.0921  |
| C           | 5.0227  | -0.8919 | 1.52        | C | 4.8998  | -1.5738 | 1.3862  |
| O           | 4.6867  | -1.754  | -0.7033     | O | 4.4943  | -2.1006 | -0.9283 |
| C           | 0.5549  | 2.0575  | 1.9496      | C | 0.7089  | 1.6471  | 2.2643  |
| C           | 2.003   | 2.4066  | 1.6724      | C | 2.1843  | 1.8952  | 2.0512  |
| C           | 2.5192  | 2.417   | 0.4277      | C | 2.7171  | 2.0584  | 0.8247  |
| C           | 2.8321  | 2.7438  | 2.8788      | C | 3.0234  | 1.9636  | 3.2948  |
| O           | -2.1092 | -0.772  | 0.6607      | O | -2.1812 | -0.6633 | 0.5144  |
| C           | -3.2508 | -1.1765 | 1.2724      | C | -3.3727 | -1.021  | 1.0552  |
| C           | -6.7291 | -0.3327 | -1.0881     | C | -6.6758 | 0.5472  | -1.1822 |
| C           | -5.4726 | 0.027   | -1.5743     | C | -5.3801 | 0.7265  | -1.6655 |
| C           | -4.3275 | -0.2394 | -0.82       | C | -4.2909 | 0.2225  | -0.951  |

|   |         |         |         |   |         |         |         |
|---|---------|---------|---------|---|---------|---------|---------|
| C | -4.4362 | -0.8666 | 0.4285  | C | -4.4954 | -0.4631 | 0.2546  |
| C | -5.7029 | -1.2251 | 0.9095  | C | -5.801  | -0.6418 | 0.7312  |
| C | -6.8454 | -0.9584 | 0.1523  | C | -6.8874 | -0.1367 | 0.0142  |
| O | -3.3215 | -1.7307 | 2.3576  | O | -3.5276 | -1.6959 | 2.0597  |
| C | -0.1825 | 3.6597  | -0.2686 | C | 0.1202  | 3.6442  | 0.3166  |
| O | -1.2819 | 4.0135  | 0.1538  | O | 0.7721  | 4.6389  | 0.0113  |
| H | -1.1884 | -3.0058 | 0.4488  | H | -1.4712 | -2.9114 | -0.0551 |
| H | -1.0232 | -0.8463 | 2.4408  | H | -1.1506 | -1.132  | 2.2693  |
| H | 0.9557  | -3.1925 | -0.4321 | H | 0.679   | -3.1767 | -0.9126 |
| H | 1.7279  | -2.4455 | 0.9623  | H | 1.4705  | -2.7243 | 0.5934  |
| H | -1.2155 | 1.4471  | 0.9193  | H | -1.0918 | 1.3812  | 1.1492  |
| H | 1.6031  | 0.7471  | -2.5046 | H | 1.7037  | 0.971   | -2.3386 |
| H | 2.5875  | -1.2413 | -1.5572 | H | 2.4967  | -1.2229 | -1.7163 |
| H | 0.1196  | -4.3229 | 2.1009  | H | -0.3538 | -4.6066 | 1.3767  |
| H | -1.1869 | -3.4261 | 2.8895  | H | -1.5905 | -3.7202 | 2.2818  |
| H | 0.4818  | -2.8483 | 3.0154  | H | 0.1224  | -3.3457 | 2.5279  |
| H | 1.9392  | 2.9796  | -1.5075 | H | 2.2315  | 2.9765  | -0.9994 |
| H | 3.9609  | 0.2894  | -2.81   | H | 4.0163  | 0.3516  | -2.708  |
| H | 4.3898  | 1.2594  | -1.3943 | H | 4.5073  | 1.0412  | -1.1549 |
| H | 3.6464  | 2.0246  | -2.8057 | H | 3.8614  | 2.0861  | -2.4286 |
| H | -0.632  | 2.7164  | -2.4973 | H | -0.3731 | 3.0934  | -2.0261 |
| H | -0.4315 | 1.0052  | -2.3263 | H | -0.3148 | 1.3682  | -2.1156 |
| H | -1.7425 | 1.8098  | -1.4767 | H | -1.5594 | 2.1411  | -1.1418 |
| H | -1.1855 | -2.4583 | -4.1859 | H | -2.2444 | -1.4445 | -3.1066 |
| H | -2.1478 | -2.0332 | -2.7599 | H | -1.4084 | -0.0217 | -3.8189 |
| H | -1.4175 | -0.7443 | -3.7771 | H | -1.2539 | -1.6239 | -4.567  |
| H | 4.4274  | -1.265  | 2.3574  | H | 5.7835  | -2.2075 | 1.2692  |
| H | 5.9619  | -1.4512 | 1.4845  | H | 5.2255  | -0.5672 | 1.6608  |
| H | 5.2515  | 0.1686  | 1.6529  | H | 4.2666  | -2.0003 | 2.1683  |
| H | 0.0199  | 2.9765  | 2.2183  | H | 0.2575  | 2.5603  | 2.6716  |
| H | 0.4848  | 1.4171  | 2.8385  | H | 0.5612  | 0.8845  | 3.04    |
| H | 3.5687  | 2.6741  | 0.292   | H | 3.785   | 2.2491  | 0.7312  |
| H | 3.8617  | 3.004   | 2.6119  | H | 4.0761  | 2.1667  | 3.0718  |
| H | 2.3984  | 3.5973  | 3.4098  | H | 2.6613  | 2.76    | 3.9528  |
| H | 2.8708  | 1.8896  | 3.5626  | H | 2.9751  | 1.0135  | 3.8367  |
| H | -7.6198 | -0.1224 | -1.6755 | H | -7.5232 | 0.9396  | -1.7398 |
| H | -5.385  | 0.519   | -2.54   | H | -5.2193 | 1.2582  | -2.6004 |
| H | -3.3588 | 0.05    | -1.2163 | H | -3.2905 | 0.3677  | -1.3482 |
| H | -5.8048 | -1.7127 | 1.8773  | H | -5.9774 | -1.1757 | 1.6634  |
| H | -7.8253 | -1.2373 | 0.5321  | H | -7.8983 | -0.2782 | 0.3892  |
| H | 0.5772  | 4.4207  | -0.5183 | H | -0.8009 | 3.7636  | 0.9159  |

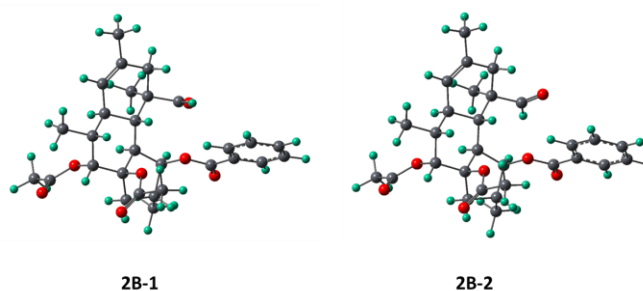

**Figure S8.** Key conformers of isomer **2B**.

**Table S7.** Important thermodynamic parameters and Boltzmann distributions of the optimized isomer **2B** at B3LYP/6-31G\* level in the gas phase.

| Conformations | Energy (a.u) | $\Delta G$ (kcal/mol) | %      | Number of imaginary frequencies |
|---------------|--------------|-----------------------|--------|---------------------------------|
| <b>2B-1</b>   | -1653.372565 | 0                     | 93.82% | 0                               |
| <b>2B-2</b>   | -1653.369999 | 1.610341867           | 6.18%  | 0                               |

**Table S8.** Optimized Z-matrixes of isomer **2B** in the gas phase (Å) at B3LYP/6-31G\* level.

| <b>2B-1</b> | <b>2B-2</b> |
|-------------|-------------|
|             |             |

|   |         |         |         |   |         |         |         |
|---|---------|---------|---------|---|---------|---------|---------|
| C | -2.939  | 0.1973  | 0.2731  | C | -2.629  | 1.2713  | -0.1111 |
| C | -1.5893 | 0.6509  | 0.8904  | C | -1.2201 | 1.3754  | 0.5265  |
| C | -0.6359 | -0.5403 | 0.6448  | C | -0.7615 | -0.0866 | 0.7001  |
| C | -1.1312 | -1.0848 | -0.7289 | C | -1.391  | -0.7801 | -0.5461 |
| C | -2.6448 | -1.1155 | -0.4788 | C | -2.8165 | -0.2122 | -0.4848 |
| C | 0.9036  | -0.3207 | 0.6421  | C | 0.7514  | -0.4236 | 0.8281  |
| C | 1.0804  | -2.2758 | -1.0549 | C | 0.231   | -2.71   | -0.2792 |
| C | -0.4653 | -2.4432 | -1.0312 | C | -1.2658 | -2.3125 | -0.4212 |
| C | -4.0163 | -0.0131 | 1.3323  | C | -3.728  | 1.7406  | 0.8363  |
| C | 1.5899  | -1.6996 | 0.305   | C | 0.873   | -1.9934 | 0.9529  |
| C | 1.7329  | -3.6184 | -1.4223 | C | 0.3484  | -4.2413 | -0.2172 |
| H | -0.8688 | -1.2887 | 1.4165  | H | -1.2685 | -0.4655 | 1.6     |
| O | -0.7887 | -0.0955 | -1.7431 | O | -0.6813 | -0.2911 | -1.7194 |
| C | 1.5248  | 0.2853  | 1.9467  | C | 1.5469  | 0.2741  | 1.9837  |
| C | 1.2587  | -0.5811 | 3.1925  | C | 0.9728  | -0.0457 | 3.378   |
| C | -1.2199 | -0.2507 | -3.0223 | C | -1.1017 | -0.6191 | -2.9676 |
| O | -1.8698 | -1.1917 | -3.4481 | O | -2.046  | -1.3449 | -3.2345 |
| C | -0.7898 | 0.9219  | -3.8488 | C | -0.2374 | 0.0567  | -3.9872 |
| O | -0.828  | -3.3869 | 0.0067  | O | -1.9882 | -2.7488 | 0.7574  |
| C | -1.2756 | -4.6119 | -0.3813 | C | -2.8484 | -3.7943 | 0.619   |
| C | -1.6281 | -5.4255 | 0.8262  | C | -3.5136 | -4.0762 | 1.9314  |
| O | -1.3729 | -5.0094 | -1.5316 | O | -3.0543 | -4.4249 | -0.4058 |
| C | 3.054   | 0.4833  | 1.7491  | C | 3.0391  | -0.1598 | 1.9112  |
| C | 3.7607  | -0.637  | 1.0383  | C | 3.2658  | -1.627  | 1.6721  |
| C | 3.0961  | -1.6099 | 0.3954  | C | 2.2878  | -2.4386 | 1.2413  |
| C | 5.2625  | -0.6056 | 1.098   | C | 4.6579  | -2.1267 | 1.938   |
| H | 1.1407  | 0.3773  | -0.1751 | H | 1.242   | -0.1238 | -0.1101 |
| H | 1.2987  | -2.4266 | 1.0762  | H | 0.2942  | -2.3102 | 1.8324  |
| O | -1.0897 | 1.8129  | 0.2018  | O | -0.3381 | 2.0602  | -0.3768 |
| C | -1.7333 | 2.9817  | 0.4541  | C | -0.4379 | 3.414   | -0.3956 |
| C | 0.0399  | 6.2483  | -1.6818 | C | 1.9917  | 5.1303  | -3.4776 |
| C | -0.9884 | 6.4702  | -0.7667 | C | 0.9821  | 5.8765  | -2.8703 |
| C | -1.5558 | 5.3955  | -0.0795 | C | 0.2024  | 5.3058  | -1.8624 |
| C | -1.0951 | 4.0916  | -0.304  | C | 0.4273  | 3.9823  | -1.4616 |
| C | -0.0612 | 3.8757  | -1.227  | C | 1.4478  | 3.2401  | -2.071  |
| C | 0.5034  | 4.9535  | -1.9128 | C | 2.227   | 3.8151  | -3.0772 |
| O | -2.6947 | 3.1274  | 1.1897  | O | -1.1695 | 4.0799  | 0.3197  |
| C | 1.0117  | 1.6985  | 2.2005  | C | 1.557   | 1.7957  | 1.848   |
| O | 0.4275  | 2.0553  | 3.2188  | O | 2.2974  | 2.4227  | 1.0952  |
| H | -3.3019 | 0.9394  | -0.4488 | H | -2.6812 | 1.8746  | -1.0263 |
| H | -1.6656 | 0.8668  | 1.9622  | H | -1.2358 | 1.8842  | 1.497   |
| H | -3.242  | -1.1645 | -1.3933 | H | -3.3637 | -0.2938 | -1.4277 |
| H | -2.9246 | -1.9787 | 0.1368  | H | -3.4119 | -0.7245 | 0.2801  |
| H | 1.3426  | -1.5671 | -1.8521 | H | 0.7644  | -2.3876 | -1.1837 |
| H | -0.7921 | -2.8046 | -2.0109 | H | -1.6695 | -2.7895 | -1.3194 |
| H | -4.9424 | -0.3761 | 0.8745  | H | -4.714  | 1.6135  | 0.3775  |
| H | -4.2418 | 0.9248  | 1.8493  | H | -3.6035 | 2.8008  | 1.0786  |
| H | -3.7001 | -0.7439 | 2.0846  | H | -3.7147 | 1.1768  | 1.7753  |
| H | 1.236   | -4.0687 | -2.2885 | H | -0.2513 | -4.71   | -1.005  |
| H | 1.6878  | -4.331  | -0.5925 | H | 0.0136  | -4.6345 | 0.7481  |
| H | 2.7822  | -3.4881 | -1.7036 | H | 1.3798  | -4.5683 | -0.3804 |
| H | 1.686   | -0.1194 | 4.0912  | H | 1.5201  | 0.4965  | 4.159   |
| H | 1.6978  | -1.5793 | 3.1102  | H | 1.0325  | -1.1098 | 3.6239  |
| H | 0.186   | -0.6957 | 3.3803  | H | -0.0749 | 0.2624  | 3.4608  |
| H | -1.3252 | 1.8173  | -3.5245 | H | -0.5094 | -0.2977 | -4.9854 |
| H | 0.2902  | 1.0651  | -3.7586 | H | -0.3903 | 1.1377  | -3.9417 |
| H | -1.0235 | 0.7298  | -4.8998 | H | 0.8122  | -0.1912 | -3.8086 |
| H | -2.0116 | -6.3992 | 0.5082  | H | -4.2208 | -4.9015 | 1.8098  |
| H | -0.7371 | -5.5833 | 1.4389  | H | -2.7634 | -4.3645 | 2.672   |
| H | -2.4062 | -4.917  | 1.4012  | H | -4.0646 | -3.193  | 2.2646  |
| H | 3.2493  | 1.398   | 1.1716  | H | 3.5591  | 0.3695  | 1.1014  |
| H | 3.5239  | 0.6434  | 2.7292  | H | 3.5431  | 0.1399  | 2.8403  |
| H | 3.6764  | -2.4171 | -0.0449 | H | 2.5134  | -3.4973 | 1.1397  |
| H | 5.7157  | -1.4374 | 0.5484  | H | 4.7617  | -3.1952 | 1.722   |
| H | 5.639   | 0.3256  | 0.6623  | H | 5.3788  | -1.5892 | 1.3135  |
| H | 5.6027  | -0.6673 | 2.1367  | H | 4.9228  | -1.9714 | 2.9888  |

|   |         |        |         |   |         |        |         |
|---|---------|--------|---------|---|---------|--------|---------|
| H | 0.4799  | 7.0872 | -2.2161 | H | 2.6026  | 5.5775 | -4.258  |
| H | -1.3496 | 7.48   | -0.5867 | H | 0.8044  | 6.9039 | -3.1779 |
| H | -2.3573 | 5.579  | 0.6342  | H | -0.5814 | 5.8957 | -1.3914 |
| H | 0.3122  | 2.8747 | -1.4253 | H | 1.6591  | 2.2213 | -1.7551 |
| H | 1.3043  | 4.7848 | -2.6287 | H | 3.0246  | 3.2397 | -3.5404 |
| H | 1.2052  | 2.4277 | 1.3941  | H | 0.8124  | 2.3408 | 2.4542  |

**Table S9.** Experimental chemical shifts of **2**, calculated shielding tensors and chemical shifts of isomers **2A** and **2B** in gas phase with TMS as reference at mPW1PW91/6-31G\* level.

| Nuclie                                                                                                                                                                                                                                                                                                               | $\delta(\text{exptl})$ | 2A    |                              |                               |            |            | 2B    |                              |                               |            |            |
|----------------------------------------------------------------------------------------------------------------------------------------------------------------------------------------------------------------------------------------------------------------------------------------------------------------------|------------------------|-------|------------------------------|-------------------------------|------------|------------|-------|------------------------------|-------------------------------|------------|------------|
|                                                                                                                                                                                                                                                                                                                      |                        | oiso  | $\bar{\delta}(\text{calcd})$ | $\bar{\delta}(\text{scaled})$ | $\Delta 1$ | $\Delta 2$ | oiso  | $\bar{\delta}(\text{calcd})$ | $\bar{\delta}(\text{scaled})$ | $\Delta 1$ | $\Delta 2$ |
| C-1                                                                                                                                                                                                                                                                                                                  | 38.2                   | 155.0 | 38.0                         | 37.2                          | 0.2        | 1.0        | 157.5 | 35.5                         | 36.4                          | 2.7        | 1.8        |
| C-2                                                                                                                                                                                                                                                                                                                  | 41.1                   | 153.4 | 39.6                         | 38.8                          | 1.5        | 2.3        | 152.2 | 40.8                         | 41.9                          | 0.3        | 0.8        |
| C-3                                                                                                                                                                                                                                                                                                                  | 82.2                   | 112.1 | 80.9                         | 83.2                          | 1.3        | 1.0        | 113.9 | 79.1                         | 82.6                          | 3.1        | 0.4        |
| C-4                                                                                                                                                                                                                                                                                                                  | 47.2                   | 139.6 | 53.4                         | 53.7                          | 6.2        | 6.5        | 146.2 | 46.8                         | 48.3                          | 0.4        | 1.1        |
| C-5                                                                                                                                                                                                                                                                                                                  | 37.4                   | 159.2 | 33.8                         | 32.7                          | 3.6        | 4.7        | 156.7 | 36.3                         | 37.2                          | 1.1        | 0.2        |
| C-6                                                                                                                                                                                                                                                                                                                  | 49.3                   | 141.9 | 51.1                         | 51.2                          | 1.8        | 1.9        | 144.6 | 48.4                         | 50.0                          | 0.9        | 0.7        |
| C-9                                                                                                                                                                                                                                                                                                                  | 205.2                  | -1.7  | 194.7                        | 205.5                         | 10.5       | 0.3        | -3.3  | 196.3                        | 206.8                         | 8.9        | 1.6        |
| C-10                                                                                                                                                                                                                                                                                                                 | 132.4                  | 65.3  | 127.7                        | 133.6                         | 4.7        | 1.2        | 66.3  | 126.7                        | 133.1                         | 5.7        | 0.7        |
| C-11                                                                                                                                                                                                                                                                                                                 | 121.8                  | 69.8  | 123.2                        | 128.7                         | 1.4        | 6.9        | 74.1  | 118.9                        | 124.8                         | 2.9        | 3.0        |
| C-12                                                                                                                                                                                                                                                                                                                 | 38.0                   | 149.0 | 44.0                         | 43.5                          | 6.0        | 5.5        | 155.6 | 37.4                         | 38.4                          | 0.6        | 0.4        |
| C-13                                                                                                                                                                                                                                                                                                                 | 36.1                   | 158.9 | 34.1                         | 33.0                          | 2.0        | 3.1        | 157.1 | 35.9                         | 36.8                          | 0.2        | 0.7        |
| C-14                                                                                                                                                                                                                                                                                                                 | 72.4                   | 122.7 | 70.3                         | 71.9                          | 2.1        | 0.5        | 123.4 | 69.6                         | 72.5                          | 2.8        | 0.1        |
| C-15                                                                                                                                                                                                                                                                                                                 | 92.3                   | 100.0 | 93.0                         | 96.2                          | 0.7        | 3.9        | 102.1 | 90.9                         | 95.1                          | 1.4        | 2.8        |
| C-16                                                                                                                                                                                                                                                                                                                 | 20.5                   | 173.6 | 19.4                         | 17.2                          | 1.1        | 3.3        | 173.2 | 19.8                         | 19.7                          | 0.7        | 0.8        |
| C-17                                                                                                                                                                                                                                                                                                                 | 13.3                   | 173.9 | 19.1                         | 16.9                          | 5.8        | 3.6        | 179.0 | 14.0                         | 13.5                          | 0.7        | 0.2        |
| C-18                                                                                                                                                                                                                                                                                                                 | 23.8                   | 168.4 | 24.6                         | 22.7                          | 0.8        | 1.1        | 168.9 | 24.1                         | 24.3                          | 0.3        | 0.5        |
| C-19                                                                                                                                                                                                                                                                                                                 | 37.8                   | 154.9 | 38.1                         | 37.2                          | 0.3        | 0.6        | 157.9 | 35.1                         | 35.9                          | 2.7        | 1.9        |
| C-20                                                                                                                                                                                                                                                                                                                 | 15.8                   | 173.8 | 19.2                         | 16.9                          | 3.4        | 1.1        | 177.1 | 15.9                         | 15.6                          | 0.1        | 0.2        |
| C-1'                                                                                                                                                                                                                                                                                                                 | 166.7                  | 34.1  | 158.9                        | 167.0                         | 7.8        | 0.3        | 35.3  | 157.7                        | 166.0                         | 9.0        | 0.7        |
| C-2'                                                                                                                                                                                                                                                                                                                 | 131.7                  | 68.4  | 124.6                        | 130.2                         | 7.1        | 1.5        | 67.6  | 125.4                        | 131.7                         | 6.3        | 0.0        |
| C-3',7'                                                                                                                                                                                                                                                                                                              | 130.5                  | 69.3  | 123.7                        | 129.2                         | 6.8        | 1.3        | 66.1  | 126.9                        | 133.3                         | 3.6        | 2.8        |
| C-3',7'                                                                                                                                                                                                                                                                                                              | 130.5                  | 66.3  | 126.7                        | 132.4                         | 3.8        | 1.9        | 69.8  | 123.2                        | 129.4                         | 7.3        | 1.1        |
| C-4',6'                                                                                                                                                                                                                                                                                                              | 129.8                  | 71.1  | 121.9                        | 127.3                         | 7.9        | 2.5        | 70.3  | 122.7                        | 128.9                         | 7.1        | 0.9        |
| C-4',6'                                                                                                                                                                                                                                                                                                              | 129.8                  | 70.5  | 122.5                        | 128.0                         | 7.3        | 1.8        | 71.3  | 121.7                        | 127.8                         | 8.1        | 2.0        |
| C-5'                                                                                                                                                                                                                                                                                                                 | 134.5                  | 66.3  | 126.7                        | 132.5                         | 7.8        | 2.0        | 66.5  | 126.5                        | 132.9                         | 8.0        | 1.6        |
| C-1''                                                                                                                                                                                                                                                                                                                | 171.8                  | 31.6  | 161.4                        | 169.8                         | 10.4       | 2.0        | 31.8  | 161.2                        | 169.7                         | 10.6       | 2.1        |
| C-2''                                                                                                                                                                                                                                                                                                                | 20.8                   | 172.4 | 20.6                         | 18.4                          | 0.2        | 2.4        | 172.6 | 20.4                         | 20.4                          | 0.4        | 0.4        |
| C-1'''                                                                                                                                                                                                                                                                                                               | 171.4                  | 31.5  | 161.5                        | 169.8                         | 9.9        | 1.6        | 31.3  | 161.7                        | 170.2                         | 9.7        | 1.2        |
| C-2'''                                                                                                                                                                                                                                                                                                               | 22.4                   | 171.0 | 22.0                         | 19.9                          | 0.4        | 2.5        | 171.4 | 21.6                         | 21.6                          | 0.8        | 0.8        |
| $\Delta 1 =  \bar{\delta}(\text{calcd}) - \delta(\text{exptl}) $ , $\Delta 2 =  \bar{\delta}(\text{scaled}) - \delta(\text{exptl}) $ ;<br><b>2A:</b> $Y = 0.9305X + 3.4472$ , $R^2 = 0.9974$ , MAE = 4.2 ppm, CMAE = 2.4 ppm;<br><b>2B:</b> $Y = 0.9429X + 1.2182$ , $R^2 = 0.9994$ , MAE = 3.7 ppm, CMAE = 1.1 ppm; |                        |       |                              |                               |            |            |       |                              |                               |            |            |
| Nuclie                                                                                                                                                                                                                                                                                                               | $\delta(\text{exptl})$ | 2A    |                              |                               |            |            | 2B    |                              |                               |            |            |
|                                                                                                                                                                                                                                                                                                                      |                        | oiso  | $\bar{\delta}(\text{calcd})$ | $\bar{\delta}(\text{scaled})$ | $\Delta 1$ | $\Delta 2$ | oiso  | $\bar{\delta}(\text{calcd})$ | $\bar{\delta}(\text{scaled})$ | $\Delta 1$ | $\Delta 2$ |
| H-1a                                                                                                                                                                                                                                                                                                                 | 1.04                   | 30.94 | 1.06                         | 1.02                          | 0.02       | 0.02       | 30.93 | 1.07                         | 1.14                          | 0.03       | 0.10       |
| H-1b                                                                                                                                                                                                                                                                                                                 | 2.64                   | 29.24 | 2.76                         | 2.69                          | 0.12       | 0.05       | 29.25 | 2.75                         | 2.78                          | 0.11       | 0.14       |
| H-2                                                                                                                                                                                                                                                                                                                  | 2.00                   | 29.93 | 2.07                         | 2.01                          | 0.07       | 0.01       | 29.95 | 2.05                         | 2.10                          | 0.05       | 0.10       |
| H-3                                                                                                                                                                                                                                                                                                                  | 4.47                   | 27.14 | 4.86                         | 4.77                          | 0.39       | 0.30       | 27.49 | 4.51                         | 4.50                          | 0.04       | 0.03       |
| H-4                                                                                                                                                                                                                                                                                                                  | 2.04                   | 29.97 | 2.03                         | 1.97                          | 0.01       | 0.07       | 30.05 | 1.95                         | 2.00                          | 0.09       | 0.04       |
| H-5                                                                                                                                                                                                                                                                                                                  | 2.39                   | 29.44 | 2.56                         | 2.50                          | 0.17       | 0.11       | 29.51 | 2.49                         | 2.53                          | 0.10       | 0.14       |
| H-7                                                                                                                                                                                                                                                                                                                  | 9.08                   | 22.65 | 9.35                         | 9.18                          | 0.27       | 0.10       | 22.59 | 9.41                         | 9.29                          | 0.33       | 0.21       |
| H-11                                                                                                                                                                                                                                                                                                                 | 5.44                   | 26.07 | 5.93                         | 5.82                          | 0.49       | 0.38       | 26.44 | 5.56                         | 5.53                          | 0.12       | 0.09       |
| H-12                                                                                                                                                                                                                                                                                                                 | 1.98                   | 29.69 | 2.31                         | 2.25                          | 0.33       | 0.27       | 29.82 | 2.18                         | 2.22                          | 0.20       | 0.24       |
| H-13                                                                                                                                                                                                                                                                                                                 | 1.80                   | 29.91 | 2.09                         | 2.03                          | 0.29       | 0.23       | 30.20 | 1.80                         | 1.86                          | 0.00       | 0.06       |
| H-14                                                                                                                                                                                                                                                                                                                 | 5.88                   | 25.72 | 6.28                         | 6.16                          | 0.40       | 0.28       | 25.96 | 6.04                         | 5.99                          | 0.16       | 0.11       |
| H-16                                                                                                                                                                                                                                                                                                                 | 1.11                   | 31.14 | 0.86                         | 0.82                          | 0.25       | 0.29       | 31.15 | 0.85                         | 0.92                          | 0.26       | 0.19       |
| H-16                                                                                                                                                                                                                                                                                                                 | 1.11                   | 30.03 | 1.97                         | 1.91                          | 0.86       | 0.80       | 29.98 | 2.02                         | 2.07                          | 0.91       | 0.96       |
| H-16                                                                                                                                                                                                                                                                                                                 | 1.11                   | 31.35 | 0.65                         | 0.61                          | 0.46       | 0.50       | 31.39 | 0.61                         | 0.70                          | 0.50       | 0.41       |
| H-17                                                                                                                                                                                                                                                                                                                 | 0.96                   | 31.51 | 0.49                         | 0.46                          | 0.47       | 0.50       | 31.19 | 0.81                         | 0.89                          | 0.15       | 0.07       |
| H-17                                                                                                                                                                                                                                                                                                                 | 0.96                   | 29.48 | 2.52                         | 2.46                          | 1.56       | 1.50       | 31.14 | 0.86                         | 0.94                          | 0.10       | 0.02       |
| H-17                                                                                                                                                                                                                                                                                                                 | 0.96                   | 31.22 | 0.78                         | 0.75                          | 0.18       | 0.21       | 30.97 | 1.03                         | 1.10                          | 0.07       | 0.14       |
| H-18                                                                                                                                                                                                                                                                                                                 | 1.63                   | 30.47 | 1.53                         | 1.48                          | 0.10       | 0.15       | 30.47 | 1.53                         | 1.59                          | 0.10       | 0.04       |
| H-18                                                                                                                                                                                                                                                                                                                 | 1.63                   | 30.52 | 1.48                         | 1.44                          | 0.15       | 0.19       | 30.45 | 1.55                         | 1.61                          | 0.08       | 0.02       |

|                                                                                                                                                                                                                                                                                                             |      |       |      |      |      |      |       |      |      |      |      |
|-------------------------------------------------------------------------------------------------------------------------------------------------------------------------------------------------------------------------------------------------------------------------------------------------------------|------|-------|------|------|------|------|-------|------|------|------|------|
| H-18                                                                                                                                                                                                                                                                                                        | 1.63 | 30.56 | 1.44 | 1.39 | 0.19 | 0.24 | 30.54 | 1.46 | 1.52 | 0.17 | 0.11 |
| H-19a                                                                                                                                                                                                                                                                                                       | 1.31 | 30.49 | 1.51 | 1.46 | 0.20 | 0.15 | 30.91 | 1.09 | 1.16 | 0.22 | 0.15 |
| H-19b                                                                                                                                                                                                                                                                                                       | 2.31 | 29.84 | 2.16 | 2.11 | 0.15 | 0.20 | 29.91 | 2.09 | 2.14 | 0.22 | 0.17 |
| H-20                                                                                                                                                                                                                                                                                                        | 0.95 | 30.86 | 1.14 | 1.10 | 0.19 | 0.15 | 30.96 | 1.04 | 1.11 | 0.09 | 0.16 |
| H-20                                                                                                                                                                                                                                                                                                        | 0.95 | 30.76 | 1.24 | 1.20 | 0.29 | 0.25 | 31.41 | 0.59 | 0.67 | 0.36 | 0.28 |
| H-20                                                                                                                                                                                                                                                                                                        | 0.95 | 31.19 | 0.81 | 0.78 | 0.14 | 0.17 | 30.82 | 1.18 | 1.25 | 0.23 | 0.30 |
| H-3',7'                                                                                                                                                                                                                                                                                                     | 7.98 | 23.86 | 8.14 | 7.99 | 0.16 | 0.01 | 23.77 | 8.23 | 8.14 | 0.25 | 0.16 |
| H-3',7'                                                                                                                                                                                                                                                                                                     | 7.98 | 23.77 | 8.23 | 8.08 | 0.25 | 0.10 | 23.96 | 8.04 | 7.95 | 0.06 | 0.03 |
| H-4',6'                                                                                                                                                                                                                                                                                                     | 7.42 | 24.73 | 7.27 | 7.14 | 0.15 | 0.28 | 24.59 | 7.41 | 7.34 | 0.01 | 0.08 |
| H-4',6'                                                                                                                                                                                                                                                                                                     | 7.42 | 24.60 | 7.40 | 7.27 | 0.02 | 0.15 | 24.73 | 7.27 | 7.20 | 0.15 | 0.22 |
| H-5'                                                                                                                                                                                                                                                                                                        | 7.53 | 24.56 | 7.44 | 7.31 | 0.09 | 0.22 | 24.57 | 7.43 | 7.35 | 0.10 | 0.18 |
| H-2''                                                                                                                                                                                                                                                                                                       | 2.04 | 30.27 | 1.73 | 1.68 | 0.31 | 0.36 | 30.43 | 1.57 | 1.63 | 0.47 | 0.41 |
| H-2''                                                                                                                                                                                                                                                                                                       | 2.04 | 30.30 | 1.70 | 1.65 | 0.34 | 0.39 | 30.14 | 1.86 | 1.92 | 0.18 | 0.12 |
| H-2''                                                                                                                                                                                                                                                                                                       | 2.04 | 30.16 | 1.84 | 1.79 | 0.20 | 0.25 | 30.12 | 1.88 | 1.94 | 0.16 | 0.10 |
| H-2'''                                                                                                                                                                                                                                                                                                      | 1.96 | 30.30 | 1.70 | 1.65 | 0.26 | 0.31 | 30.05 | 1.95 | 2.00 | 0.01 | 0.04 |
| H-2'''                                                                                                                                                                                                                                                                                                      | 1.96 | 30.00 | 2.00 | 1.94 | 0.04 | 0.02 | 30.01 | 1.99 | 2.04 | 0.03 | 0.08 |
| H-2'''                                                                                                                                                                                                                                                                                                      | 1.96 | 30.21 | 1.79 | 1.74 | 0.17 | 0.22 | 30.51 | 1.49 | 1.55 | 0.47 | 0.41 |
| $\Delta 1 =  \delta(\text{calcd}) - \delta(\text{exptl}) $ , $\Delta 2 =  \delta(\text{scaled}) - \delta(\text{exptl}) $ ;<br><b>2A:</b> $Y = 1.015X - 0.0239$ , $R^2 = 0.9783$ , MAE = 0.27 ppm, CMAE = 0.26 ppm;<br><b>2B:</b> $Y = 1.0237X - 0.0995$ , $R^2 = 0.9907$ , MAE = 0.18 ppm, CMAE = 0.17 ppm; |      |       |      |      |      |      |       |      |      |      |      |

**Table S10.** Experimental chemical shifts of **2**, calculated shielding tensors and chemical shifts of isomers **2A** and **2B** in methanol with TMS as reference at mPW1PW91/6-31G\*\* level.

| Nuclie                                                                                                                                                                                                                                                                                                  | $\delta(\text{exptl})$ | 2A                    |                        |                         |            |            | 2B                    |                        |                         |            |            |
|---------------------------------------------------------------------------------------------------------------------------------------------------------------------------------------------------------------------------------------------------------------------------------------------------------|------------------------|-----------------------|------------------------|-------------------------|------------|------------|-----------------------|------------------------|-------------------------|------------|------------|
|                                                                                                                                                                                                                                                                                                         |                        | $\sigma_{\text{iso}}$ | $\delta(\text{calcd})$ | $\delta(\text{scaled})$ | $\Delta 1$ | $\Delta 2$ | $\sigma_{\text{iso}}$ | $\delta(\text{calcd})$ | $\delta(\text{scaled})$ | $\Delta 1$ | $\Delta 2$ |
| C-1                                                                                                                                                                                                                                                                                                     | 38.2                   | 156.3                 | 36.7                   | 37.1                    | 1.5        | 1.1        | 158.8                 | 34.2                   | 36.4                    | 4.0        | 1.8        |
| C-2                                                                                                                                                                                                                                                                                                     | 41.1                   | 154.4                 | 38.6                   | 39.1                    | 2.5        | 2.0        | 153.1                 | 39.9                   | 42.3                    | 1.2        | 1.2        |
| C-3                                                                                                                                                                                                                                                                                                     | 82.2                   | 112.4                 | 80.6                   | 83.3                    | 1.6        | 1.1        | 114.0                 | 79.0                   | 82.8                    | 3.2        | 0.6        |
| C-4                                                                                                                                                                                                                                                                                                     | 47.2                   | 140.4                 | 52.6                   | 53.8                    | 5.4        | 6.6        | 146.9                 | 46.1                   | 48.7                    | 1.1        | 1.5        |
| C-5                                                                                                                                                                                                                                                                                                     | 37.4                   | 159.9                 | 33.1                   | 33.4                    | 4.3        | 4.0        | 157.5                 | 35.5                   | 37.7                    | 1.9        | 0.3        |
| C-6                                                                                                                                                                                                                                                                                                     | 49.3                   | 141.4                 | 51.6                   | 52.8                    | 2.3        | 3.5        | 144.0                 | 49.0                   | 51.7                    | 0.3        | 2.4        |
| C-9                                                                                                                                                                                                                                                                                                     | 205.2                  | -5.6                  | 198.6                  | 207.3                   | 6.6        | 2.1        | -7.5                  | 200.5                  | 208.7                   | 4.7        | 3.5        |
| C-10                                                                                                                                                                                                                                                                                                    | 132.4                  | 64.5                  | 128.5                  | 133.6                   | 3.9        | 1.2        | 65.6                  | 127.4                  | 133.0                   | 5.0        | 0.6        |
| C-11                                                                                                                                                                                                                                                                                                    | 121.8                  | 70.9                  | 122.1                  | 126.8                   | 0.3        | 5.0        | 75.8                  | 117.2                  | 122.4                   | 4.6        | 0.6        |
| C-12                                                                                                                                                                                                                                                                                                    | 38.0                   | 150.0                 | 43.0                   | 43.7                    | 5.0        | 5.7        | 156.4                 | 36.6                   | 38.8                    | 1.4        | 0.8        |
| C-13                                                                                                                                                                                                                                                                                                    | 36.1                   | 160.0                 | 33.0                   | 33.3                    | 3.1        | 2.8        | 157.9                 | 35.1                   | 37.3                    | 1.0        | 1.2        |
| C-14                                                                                                                                                                                                                                                                                                    | 72.4                   | 122.7                 | 70.3                   | 72.5                    | 2.1        | 0.1        | 123.5                 | 69.5                   | 72.9                    | 2.9        | 0.5        |
| C-15                                                                                                                                                                                                                                                                                                    | 92.3                   | 100.3                 | 92.7                   | 96.0                    | 0.4        | 3.7        | 102.3                 | 90.7                   | 94.9                    | 1.6        | 2.6        |
| C-16                                                                                                                                                                                                                                                                                                    | 20.5                   | 175.6                 | 17.4                   | 16.8                    | 3.1        | 3.7        | 175.3                 | 17.7                   | 19.2                    | 2.8        | 1.3        |
| C-17                                                                                                                                                                                                                                                                                                    | 13.3                   | 175.6                 | 17.4                   | 16.9                    | 4.1        | 3.6        | 181.1                 | 11.9                   | 13.2                    | 1.4        | 0.1        |
| C-18                                                                                                                                                                                                                                                                                                    | 23.8                   | 170.6                 | 22.4                   | 22.1                    | 1.4        | 1.7        | 171.0                 | 22.0                   | 23.7                    | 1.8        | 0.1        |
| C-19                                                                                                                                                                                                                                                                                                    | 37.8                   | 156.3                 | 36.7                   | 37.1                    | 1.1        | 0.7        | 159.4                 | 33.6                   | 35.8                    | 4.2        | 2.0        |
| C-20                                                                                                                                                                                                                                                                                                    | 15.8                   | 175.7                 | 17.3                   | 16.7                    | 1.5        | 0.9        | 179.0                 | 14.0                   | 15.4                    | 1.8        | 0.4        |
| C-1'                                                                                                                                                                                                                                                                                                    | 166.7                  | 32.9                  | 160.1                  | 166.8                   | 6.6        | 0.1        | 33.6                  | 159.4                  | 166.1                   | 7.3        | 0.6        |
| C-2'                                                                                                                                                                                                                                                                                                    | 131.7                  | 68.8                  | 124.2                  | 129.0                   | 7.5        | 2.7        | 68.5                  | 124.5                  | 130.0                   | 7.2        | 1.7        |
| C-3',7'                                                                                                                                                                                                                                                                                                 | 130.5                  | 69.3                  | 123.7                  | 128.6                   | 6.8        | 1.9        | 67.9                  | 125.1                  | 130.6                   | 5.4        | 0.1        |
| C-3',7'                                                                                                                                                                                                                                                                                                 | 130.5                  | 67.8                  | 125.2                  | 130.2                   | 5.3        | 0.3        | 69.3                  | 123.7                  | 129.1                   | 6.8        | 1.4        |
| C-4',6'                                                                                                                                                                                                                                                                                                 | 129.8                  | 70.5                  | 122.5                  | 127.3                   | 7.3        | 2.5        | 70.4                  | 122.6                  | 127.9                   | 7.2        | 1.9        |
| C-4',6'                                                                                                                                                                                                                                                                                                 | 129.8                  | 70.6                  | 122.4                  | 127.2                   | 7.4        | 2.6        | 70.3                  | 122.7                  | 128.0                   | 7.1        | 1.8        |
| C-5'                                                                                                                                                                                                                                                                                                    | 134.5                  | 65.4                  | 127.6                  | 132.6                   | 6.9        | 1.9        | 65.3                  | 127.7                  | 133.3                   | 6.8        | 1.2        |
| C-1''                                                                                                                                                                                                                                                                                                   | 171.8                  | 28.8                  | 164.2                  | 171.1                   | 7.6        | 0.7        | 28.9                  | 164.1                  | 171.0                   | 7.7        | 0.8        |
| C-2''                                                                                                                                                                                                                                                                                                   | 20.8                   | 173.8                 | 19.2                   | 18.7                    | 1.6        | 2.1        | 173.9                 | 19.1                   | 20.7                    | 1.7        | 0.1        |
| C-1'''                                                                                                                                                                                                                                                                                                  | 171.4                  | 29.1                  | 163.9                  | 170.8                   | 7.5        | 0.6        | 28.9                  | 164.1                  | 171.0                   | 7.3        | 0.4        |
| C-2'''                                                                                                                                                                                                                                                                                                  | 22.4                   | 172.2                 | 20.8                   | 20.4                    | 1.6        | 2.0        | 172.6                 | 20.4                   | 22.1                    | 2.0        | 0.3        |
| $\Delta 1 =  \delta(\text{calcd}) - \delta(\text{exptl}) $ , $\Delta 2 =  \delta(\text{scaled}) - \delta(\text{exptl}) $ ;<br><b>2A:</b> $Y = 0.9515X + 1.3834$ , $R^2 = 0.9976$ , MAE = 4.0 ppm, CMAE = 2.3 ppm;<br><b>2B:</b> $Y = 0.9648X - 0.881$ , $R^2 = 0.9994$ , MAE = 3.9 ppm, CMAE = 1.1 ppm; |                        |                       |                        |                         |            |            |                       |                        |                         |            |            |
| Nuclie                                                                                                                                                                                                                                                                                                  | $\delta(\text{exptl})$ | 2A                    |                        |                         |            |            | 2B                    |                        |                         |            |            |
|                                                                                                                                                                                                                                                                                                         |                        | $\sigma_{\text{iso}}$ | $\delta(\text{calcd})$ | $\delta(\text{scaled})$ | $\Delta 1$ | $\Delta 2$ | $\sigma_{\text{iso}}$ | $\delta(\text{calcd})$ | $\delta(\text{scaled})$ | $\Delta 1$ | $\Delta 2$ |
| H-1a                                                                                                                                                                                                                                                                                                    | 1.04                   | 30.35                 | 1.65                   | 1.08                    | 0.61       | 0.04       | 30.3                  | 1.69                   | 1.24                    | 0.60       | 0.20       |
| H-1b                                                                                                                                                                                                                                                                                                    | 2.64                   | 28.82                 | 3.18                   | 2.55                    | 0.54       | 0.09       | 28.8                  | 3.19                   | 2.66                    | 0.50       | 0.00       |
| H-2                                                                                                                                                                                                                                                                                                     | 2.00                   | 29.44                 | 2.56                   | 1.95                    | 0.56       | 0.05       | 29.5                  | 2.50                   | 2.00                    | 0.50       | 0.00       |
| H-3                                                                                                                                                                                                                                                                                                     | 4.47                   | 26.59                 | 5.41                   | 4.69                    | 0.94       | 0.22       | 27.1                  | 4.92                   | 4.30                    | 0.50       | 0.20       |
| H-4                                                                                                                                                                                                                                                                                                     | 2.04                   | 29.43                 | 2.57                   | 1.96                    | 0.53       | 0.08       | 29.5                  | 2.54                   | 2.04                    | 0.50       | 0.00       |

|         |      |       |      |      |      |      |      |      |      |      |      |
|---------|------|-------|------|------|------|------|------|------|------|------|------|
| H-5     | 2.39 | 29.01 | 2.99 | 2.36 | 0.60 | 0.03 | 29.0 | 2.99 | 2.47 | 0.60 | 0.10 |
| H-7     | 9.08 | 22.05 | 9.95 | 9.02 | 0.87 | 0.06 | 22.0 | 9.99 | 9.10 | 0.90 | 0.00 |
| H-11    | 5.44 | 25.38 | 6.62 | 5.84 | 1.18 | 0.40 | 25.8 | 6.24 | 5.55 | 0.80 | 0.10 |
| H-12    | 1.98 | 29.22 | 2.78 | 2.17 | 0.80 | 0.19 | 29.3 | 2.66 | 2.16 | 0.70 | 0.20 |
| H-13    | 1.80 | 29.28 | 2.72 | 2.10 | 0.92 | 0.30 | 29.6 | 2.36 | 1.87 | 0.60 | 0.10 |
| H-14    | 5.88 | 25.30 | 6.70 | 5.92 | 0.82 | 0.04 | 25.5 | 6.45 | 5.75 | 0.60 | 0.10 |
| H-16    | 1.11 | 30.66 | 1.34 | 0.79 | 0.23 | 0.32 | 30.7 | 1.35 | 0.91 | 0.20 | 0.20 |
| H-16    | 1.11 | 29.84 | 2.16 | 1.57 | 1.05 | 0.46 | 29.8 | 2.17 | 1.69 | 1.10 | 0.60 |
| H-16    | 1.11 | 30.72 | 1.28 | 0.73 | 0.17 | 0.38 | 30.8 | 1.24 | 0.81 | 0.10 | 0.30 |
| H-17    | 0.96 | 30.90 | 1.10 | 0.55 | 0.14 | 0.41 | 30.8 | 1.19 | 0.76 | 0.20 | 0.20 |
| H-17    | 0.96 | 28.69 | 3.31 | 2.67 | 2.35 | 1.71 | 30.5 | 1.45 | 1.01 | 0.50 | 0.10 |
| H-17    | 0.96 | 30.74 | 1.26 | 0.71 | 0.30 | 0.25 | 30.5 | 1.52 | 1.07 | 0.60 | 0.10 |
| H-18    | 1.63 | 29.94 | 2.06 | 1.47 | 0.43 | 0.16 | 30.0 | 2.04 | 1.57 | 0.40 | 0.10 |
| H-18    | 1.63 | 30.05 | 1.95 | 1.37 | 0.32 | 0.26 | 29.9 | 2.11 | 1.64 | 0.50 | 0.00 |
| H-18    | 1.63 | 29.95 | 2.05 | 1.47 | 0.42 | 0.16 | 30.0 | 2.00 | 1.52 | 0.40 | 0.10 |
| H-19a   | 1.31 | 29.91 | 2.09 | 1.50 | 0.78 | 0.19 | 30.4 | 1.62 | 1.17 | 0.30 | 0.10 |
| H-19b   | 2.31 | 29.45 | 2.55 | 1.94 | 0.24 | 0.37 | 29.3 | 2.74 | 2.23 | 0.40 | 0.10 |
| H-20    | 0.95 | 30.65 | 1.35 | 0.79 | 0.40 | 0.16 | 30.7 | 1.26 | 0.83 | 0.30 | 0.10 |
| H-20    | 0.95 | 30.24 | 1.76 | 1.19 | 0.81 | 0.24 | 30.9 | 1.12 | 0.69 | 0.20 | 0.30 |
| H-20    | 0.95 | 30.63 | 1.37 | 0.81 | 0.42 | 0.14 | 30.2 | 1.80 | 1.34 | 0.80 | 0.40 |
| H-3',7' | 7.98 | 23.04 | 8.96 | 8.07 | 0.98 | 0.09 | 23.2 | 8.81 | 7.99 | 0.80 | 0.00 |
| H-3',7' | 7.98 | 23.14 | 8.86 | 7.98 | 0.88 | 0.00 | 23.1 | 8.91 | 8.07 | 0.90 | 0.10 |
| H-4',6' | 7.42 | 23.84 | 8.16 | 7.31 | 0.74 | 0.11 | 23.8 | 8.23 | 7.43 | 0.80 | 0.00 |
| H-4',6' | 7.42 | 23.78 | 8.22 | 7.37 | 0.80 | 0.05 | 23.8 | 8.19 | 7.40 | 0.80 | 0.00 |
| H-5'    | 7.53 | 23.68 | 8.32 | 7.47 | 0.79 | 0.06 | 23.7 | 8.33 | 7.53 | 0.80 | 0.00 |
| H-2''   | 2.04 | 29.58 | 2.42 | 1.82 | 0.38 | 0.22 | 29.9 | 2.10 | 1.62 | 0.10 | 0.40 |
| H-2''   | 2.04 | 29.67 | 2.33 | 1.73 | 0.29 | 0.31 | 29.3 | 2.65 | 2.15 | 0.60 | 0.10 |
| H-2''   | 2.04 | 29.39 | 2.61 | 2.00 | 0.57 | 0.04 | 29.3 | 2.67 | 2.16 | 0.60 | 0.10 |
| H-2'''  | 1.96 | 29.69 | 2.31 | 1.71 | 0.35 | 0.25 | 29.4 | 2.59 | 2.09 | 0.60 | 0.10 |
| H-2'''  | 1.96 | 29.28 | 2.72 | 2.11 | 0.76 | 0.15 | 29.2 | 2.81 | 2.30 | 0.80 | 0.30 |
| H-2'''  | 1.96 | 29.50 | 2.50 | 1.89 | 0.54 | 0.07 | 30.0 | 2.03 | 1.56 | 0.10 | 0.40 |

$\Delta 1 = |\delta(\text{calcd}) - \delta(\text{exptl})|$ ,  $\Delta 2 = |\delta(\text{scaled}) - \delta(\text{exptl})|$ ;  
**2A:**  $Y = 1.0449X + 0.5193$ ,  $R^2 = 0.9796$ ,  $\text{MAE} = 0.65$  ppm,  $\text{CMAE} = 0.22$  ppm;  
**2B:**  $Y = 1.0553X + 0.3864$ ,  $R^2 = 0.9936$ ,  $\text{MAE} = 0.55$  ppm,  $\text{CMAE} = 0.14$  ppm;

| Functional       | Solvent?  | Basis Set | Type of Data      |          |          |          |
|------------------|-----------|-----------|-------------------|----------|----------|----------|
| mPW1PW91         | Gas Phase | 6-31G(d)  | Shielding Tensors |          |          |          |
|                  | Isomer 1  | Isomer 2  | Isomer 3          | Isomer 4 | Isomer 5 | Isomer 6 |
| sDP4+ (H data)   | 0.00%     | 100.00%   | -                 | -        | -        | -        |
| sDP4+ (C data)   | 0.00%     | 100.00%   | -                 | -        | -        | -        |
| sDP4+ (all data) | 0.00%     | 100.00%   | -                 | -        | -        | -        |
| uDP4+ (H data)   | 0.00%     | 100.00%   | -                 | -        | -        | -        |
| uDP4+ (C data)   | 0.00%     | 100.00%   | -                 | -        | -        | -        |
| uDP4+ (all data) | 0.00%     | 100.00%   | -                 | -        | -        | -        |
| DP4+ (H data)    | 0.00%     | 100.00%   | -                 | -        | -        | -        |
| DP4+ (C data)    | 0.00%     | 100.00%   | -                 | -        | -        | -        |
| DP4+ (all data)  | 0.00%     | 100.00%   | -                 | -        | -        | -        |

Figure S9. Detailed DP4+ probability of **2** calculated at mPW1PW91/6-31G\* level in gas phase.

| Functional       | Solvent? | Basis Set  | Type of Data      |          |          |          |
|------------------|----------|------------|-------------------|----------|----------|----------|
| mPW1PW91         | PCM      | 6-31G(d,p) | Shielding Tensors |          |          |          |
|                  | Isomer 1 | Isomer 2   | Isomer 3          | Isomer 4 | Isomer 5 | Isomer 6 |
| sDP4+ (H data)   | 0.00%    | 100.00%    | -                 | -        | -        | -        |
| sDP4+ (C data)   | 0.00%    | 100.00%    | -                 | -        | -        | -        |
| sDP4+ (all data) | 0.00%    | 100.00%    | -                 | -        | -        | -        |
| uDP4+ (H data)   | 0.00%    | 100.00%    | -                 | -        | -        | -        |
| uDP4+ (C data)   | 0.00%    | 100.00%    | -                 | -        | -        | -        |
| uDP4+ (all data) | 0.00%    | 100.00%    | -                 | -        | -        | -        |
| DP4+ (H data)    | 0.00%    | 100.00%    | -                 | -        | -        | -        |
| DP4+ (C data)    | 0.00%    | 100.00%    | -                 | -        | -        | -        |
| DP4+ (all data)  | 0.00%    | 100.00%    | -                 | -        | -        | -        |

Figure S10. Detailed DP4+ probability of compound **2** calculated at mPW1PW91/6-31G\*\* level in methanol with PCM model.



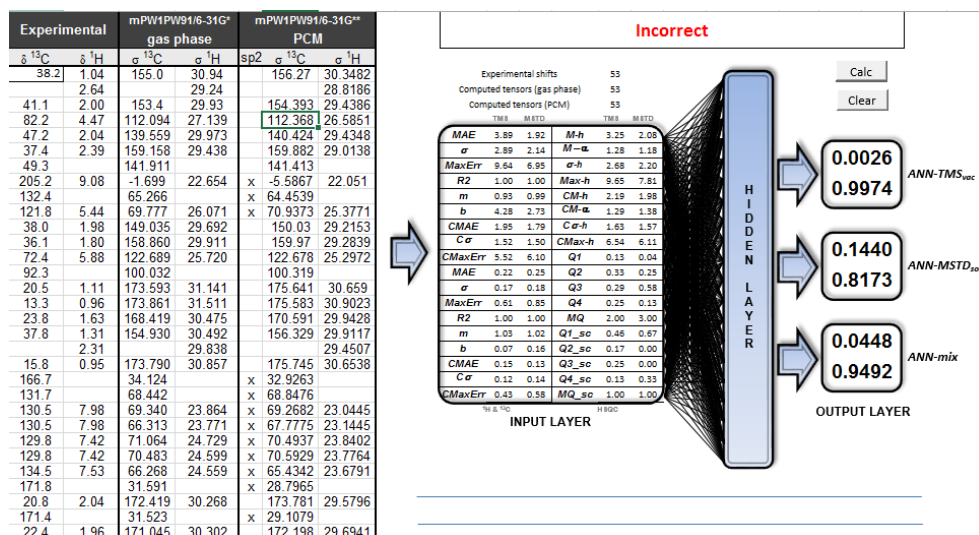

Figure S11. The result of ANN-PRA statistical analysis between compound 2 and isomer 2A.

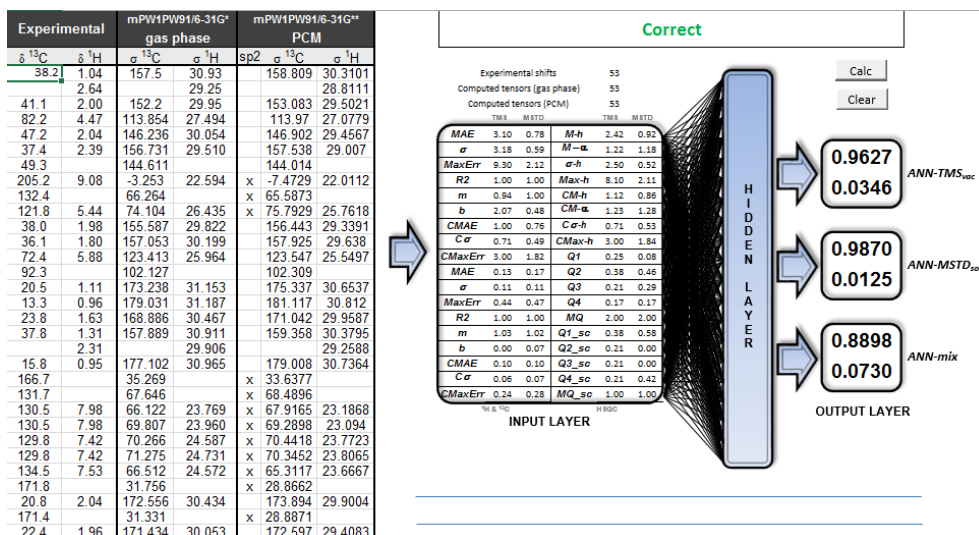

Figure S12. The result of ANN-PRA statistical analysis between compound 2 and isomer 2B.

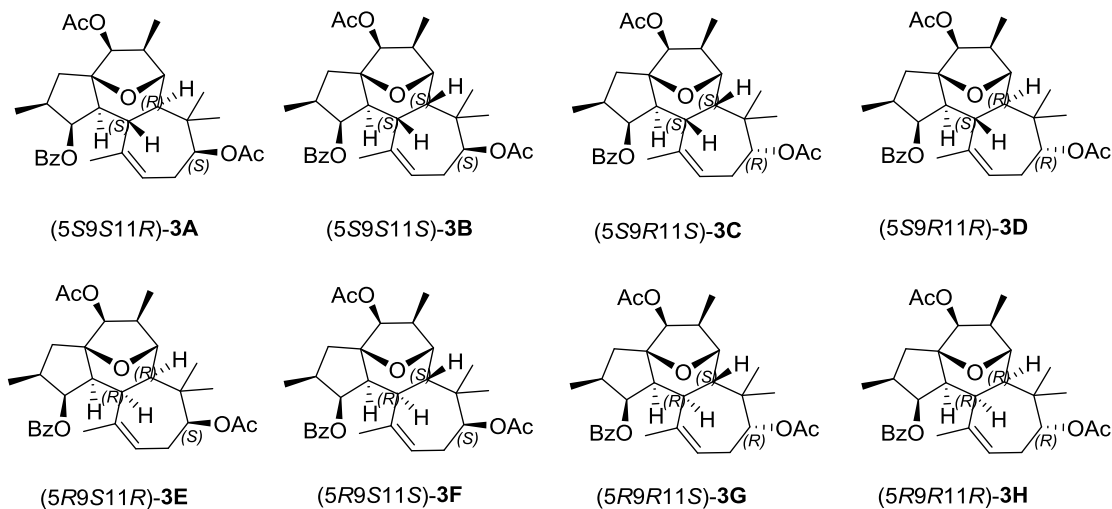

**Figure S13.** Possible isomers **3A–3H** of compound **3**.

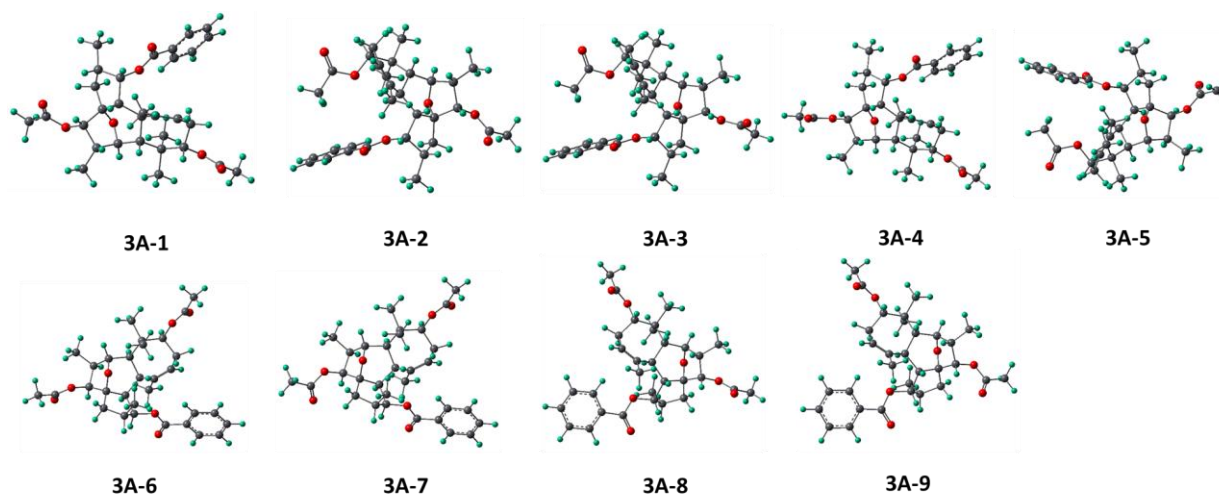

**Figure S14.** Key conformers of isomer **3A**.

**Table S11.** Important thermodynamic parameters and Boltzmann distributions of the optimized isomer **3A** at B3LYP/6-31G\* level in the gas phase.

| Conformations | Energy (a.u) | $\Delta G$ (kcal/mol) | %      | Number of imaginary frequencies |
|---------------|--------------|-----------------------|--------|---------------------------------|
| <b>3A-1</b>   | -1731.987491 | 0                     | 45.88% | 0                               |
| <b>3A-2</b>   | -1731.984505 | 1.873290682           | 1.94%  | 0                               |
| <b>3A-3</b>   | -1731.984542 | 1.8500668             | 2.02%  | 0                               |
| <b>3A-4</b>   | -1731.987436 | 0.034117333           | 43.31% | 0                               |
| <b>3A-5</b>   | -1731.984102 | 2.126594778           | 1.26%  | 0                               |
| <b>3A-6</b>   | -1731.984245 | 2.036918339           | 1.47%  | 0                               |
| <b>3A-7</b>   | -1731.984042 | 2.164150827           | 1.19%  | 0                               |
| <b>3A-8</b>   | -1731.983881 | 2.264990543           | 1.00%  | 0                               |
| <b>3A-9</b>   | -1731.984505 | 1.873303232           | 1.94%  | 0                               |

**Table S12.** Optimized Z-matrixes of isomer **3A** in the gas phase (Å) at B3LYP/6-31G\* level.

| <b>3A-1</b> |         |         |         | <b>3A-2</b> |         |         |         | <b>3A-3</b> |         |         |         |
|-------------|---------|---------|---------|-------------|---------|---------|---------|-------------|---------|---------|---------|
| C           | -1.8149 | -2.987  | -1.0147 | C           | -2.7833 | -1.4622 | -0.9518 | C           | -2.6019 | -1.7044 | -1.1784 |
| C           | -0.5601 | -2.5902 | -0.2221 | C           | -1.4097 | -1.7553 | -0.3306 | C           | -1.3462 | -1.8563 | -0.3081 |

|   |         |         |         |   |         |         |         |   |         |         |         |
|---|---------|---------|---------|---|---------|---------|---------|---|---------|---------|---------|
| C | 0.0308  | -1.411  | -1.0419 | C | -0.4325 | -0.908  | -1.1959 | C | -0.258  | -1.0844 | -1.1078 |
| C | -1.1876 | -0.816  | -1.8086 | C | -1.3164 | 0.2891  | -1.6721 | C | -1.0747 | 0.0208  | -1.8473 |
| C | -2.4075 | -1.6331 | -1.395  | C | -2.7293 | 0.0491  | -1.1433 | C | -2.5557 | -0.2284 | -1.5599 |
| C | 0.809   | -0.3341 | -0.2245 | C | 0.9165  | -0.4938 | -0.964  | C | 0.9563  | -0.5506 | -0.2575 |
| C | 0.1141  | 0.4584  | -3.317  | C | 0.2185  | 1.1084  | -3.2733 | C | 0.6759  | 0.733   | -3.2657 |
| C | -0.8881 | -0.7037 | -3.3131 | C | -1.1873 | 0.5104  | -3.19   | C | -0.7127 | 0.1001  | -3.3405 |
| C | -2.7979 | -3.8612 | -0.2514 | C | -3.9774 | -1.8989 | -0.1174 | C | -3.9085 | -2.0878 | -0.5008 |
| C | 2.1572  | -0.818  | 0.3029  | C | 1.9823  | -1.6189 | -0.4659 | C | 2.0249  | -1.6273 | 0.0603  |
| C | 2.7207  | -0.2339 | 1.3742  | C | 3.3016  | -1.4235 | -0.2532 | C | 3.2899  | -1.3631 | 0.4525  |
| C | 2.1643  | 0.9782  | 2.0501  | C | 4.0434  | -0.1748 | 0.1375  | C | 3.9361  | -0.0544 | 0.8159  |
| C | 2.1869  | 2.2003  | 1.1156  | C | 3.2485  | 0.8916  | 0.9109  | C | 3.0083  | 1.0569  | 1.3368  |
| C | 0.9522  | 1.058   | -0.9496 | C | 1.5212  | 0.8486  | -1.0772 | C | 1.6174  | 0.7461  | -0.878  |
| C | -0.1921 | 1.21    | -1.9978 | C | 0.4559  | 1.6697  | -1.8503 | C | 0.669   | 1.4434  | -1.8882 |
| C | 2.893   | -1.9231 | -0.4065 | C | 1.541   | -3.0543 | -0.649  | C | 1.6449  | -3.0888 | -0.0294 |
| C | 0.0384  | 1.3723  | -4.5356 | C | 0.4114  | 2.1674  | -4.3538 | C | 1.0313  | 1.6879  | -4.3998 |
| O | -2.0617 | -0.3312 | -4.0601 | O | -2.1467 | 1.473   | -3.6685 | O | -1.6382 | 0.9728  | -4.0186 |
| H | 0.6953  | -1.8668 | -1.7873 | H | -0.206  | -1.5105 | -2.0854 | H | 0.1138  | -1.7743 | -1.8766 |
| O | -1.3504 | 0.5591  | -1.4376 | O | -0.7824 | 1.5046  | -1.1413 | O | -0.663  | 1.3013  | -1.366  |
| C | -2.6779 | -1.3272 | -4.7505 | C | -3.2034 | 0.9789  | -4.3671 | C | -1.9753 | 0.6308  | -5.2903 |
| C | -3.8613 | -0.7817 | -5.4884 | C | -4.0896 | 2.1002  | -4.8141 | C | -2.9447 | 1.628   | -5.8462 |
| O | -2.3332 | -2.5001 | -4.7643 | O | -3.4161 | -0.2038 | -4.592  | O | -1.5537 | -0.3394 | -5.9026 |
| C | 1.0192  | 2.3051  | 0.0572  | C | 2.2687  | 1.7251  | 0.0165  | C | 2.1666  | 1.7575  | 0.2165  |
| C | -0.3331 | 2.5449  | 0.7737  | C | 1.277   | 2.4827  | 0.9324  | C | 1.0291  | 2.5707  | 0.8806  |
| C | 1.3185  | 3.5942  | -0.7709 | C | 3.1284  | 2.7985  | -0.7132 | C | 3.1101  | 2.779   | -0.4836 |
| O | 2.1487  | 3.3853  | 1.9583  | O | 2.5393  | 0.2812  | 2.0163  | O | 2.144   | 0.5389  | 2.3771  |
| H | 1.9075  | 1.0741  | -1.4943 | H | 2.2896  | 0.5852  | -1.8182 | H | 2.4977  | 0.4363  | -1.4596 |
| C | 3.3399  | 3.8353  | 2.4381  | C | 3.2768  | -0.0454 | 3.111   | C | 2.7031  | 0.3547  | 3.6028  |
| C | 3.1214  | 5.0615  | 3.2701  | C | 2.4088  | -0.707  | 4.1353  | C | 1.6947  | -0.2273 | 4.5436  |
| O | 4.4316  | 3.3255  | 2.2332  | O | 4.4702  | 0.1769  | 3.2601  | O | 3.8529  | 0.6336  | 3.9123  |
| H | 0.1781  | -0.1441 | 0.6489  | H | 0.661   | -0.3014 | 0.5492  | H | 0.536   | -0.2606 | 0.7093  |
| O | -0.9408 | -2.1485 | 1.0901  | O | -1.3905 | -1.2911 | 1.0291  | O | -1.5657 | -1.2231 | 0.9625  |
| C | -0.3026 | -2.717  | 2.1418  | C | -1.3907 | -2.2235 | 2.0098  | C | -1.7009 | -2.0237 | 2.0453  |
| C | -1.3286 | -0.7844 | 5.8293  | C | -1.3559 | -0.4058 | 5.893   | C | -2.3216 | 0.2667  | 5.6163  |
| C | -0.4223 | -1.8437 | 5.8088  | C | -1.3123 | -1.7927 | 5.7559  | C | -2.2376 | -1.1242 | 5.6685  |
| C | -0.1024 | -2.4655 | 4.6002  | C | -1.3247 | -2.3695 | 4.4843  | C | -2.0361 | -1.856  | 4.4965  |
| C | -0.6895 | -2.0306 | 3.4044  | C | -1.3783 | -1.5598 | 3.3417  | C | -1.9152 | -1.1983 | 3.2648  |
| C | -1.5999 | -0.9643 | 3.433   | C | -1.421  | -0.1656 | 3.4874  | C | -2.0001 | 0.2008  | 3.2203  |
| C | -1.9167 | -0.3444 | 4.6439  | C | -1.411  | 0.4073  | 4.7613  | C | -2.2038 | 0.929   | 4.3947  |
| O | 0.4902  | -3.6433 | 2.0912  | O | -1.4015 | -3.4337 | 1.8551  | O | -1.6597 | -3.2431 | 2.0501  |
| H | -1.508  | -3.513  | -1.9287 | H | -2.8427 | -1.9493 | -1.9345 | H | -2.4831 | -2.3141 | -2.0844 |
| H | 0.1378  | -3.433  | -0.1864 | H | -1.1842 | -2.8228 | -0.4058 | H | -1.0885 | -2.9138 | -0.2041 |
| H | -3.1667 | -1.7295 | -2.1738 | H | -3.5238 | 0.394   | -1.808  | H | -3.2116 | -0.027  | -2.4122 |
| H | -2.9051 | -1.1652 | -0.5354 | H | -2.8752 | 0.5754  | -0.1908 | H | -2.9004 | 0.4095  | -0.736  |
| H | 1.133   | 0.0517  | -3.2855 | H | 0.9341  | 0.3034  | -3.4844 | H | 1.4288  | -0.0655 | -3.2735 |
| H | -0.4274 | -1.6065 | -3.7301 | H | -1.2429 | -0.4208 | -3.7649 | H | -0.6954 | -0.8946 | -3.7997 |
| H | -3.1946 | -3.3571 | 0.6359  | H | -4.0189 | -1.382  | 0.8466  | H | -4.1236 | -1.4573 | 0.3679  |
| H | -3.6482 | -4.125  | -0.889  | H | -4.9111 | -1.6818 | -0.647  | H | -4.7451 | -1.9811 | -1.1995 |
| H | -2.3163 | -4.7896 | 0.0718  | H | -3.9406 | -2.9762 | 0.0737  | H | -3.8782 | -3.13   | -0.1673 |
| H | 3.6825  | -0.5845 | 1.7455  | H | 3.9619  | -2.2919 | -0.29   | H | 3.9644  | -2.2062 | 0.6136  |
| H | 1.1673  | 0.79    | 2.4611  | H | 4.8645  | -0.5068 | 0.7864  | H | 4.6505  | -0.2872 | 1.6166  |
| H | 2.7854  | 1.1753  | 2.9335  | H | 4.5263  | 0.2517  | -0.7481 | H | 4.5446  | 0.2949  | -0.0249 |
| H | 3.1309  | 2.2061  | 0.5511  | H | 3.9695  | 1.5993  | 1.3438  | H | 3.6377  | 1.831   | 1.798   |
| H | -0.4614 | 2.2465  | -2.1988 | H | 0.6837  | 2.7361  | -1.8896 | H | 0.8742  | 2.509   | -2.0028 |
| H | 2.3669  | -2.8757 | -0.3086 | H | 0.8805  | -3.3531 | 0.1684  | H | 0.8703  | -3.3226 | 0.7049  |
| H | 3.0066  | -1.6829 | -1.4687 | H | 1.0393  | -3.2032 | -1.6083 | H | 1.3024  | -3.3565 | -1.0319 |
| H | 3.9014  | -2.0708 | -0.0038 | H | 2.3825  | -3.7568 | -0.6344 | H | 2.4869  | -3.7552 | 0.1916  |
| H | 0.819   | 2.1389  | -4.4841 | H | 1.4549  | 2.4995  | -4.3774 | H | 2.0501  | 2.0686  | -4.2694 |
| H | -0.9254 | 1.8877  | -4.6029 | H | -0.2114 | 3.051   | -4.1786 | H | 0.3592  | 2.5516  | -4.4351 |
| H | 0.1876  | 0.8005  | -5.4573 | H | 0.1642  | 1.7625  | -5.3405 | H | 0.9877  | 1.1761  | -5.3663 |
| H | -4.3273 | -1.583  | -6.0689 | H | -3.5223 | 2.7949  | -5.4387 | H | -3.2223 | 1.3357  | -6.8629 |
| H | -4.5938 | -0.393  | -4.7767 | H | -4.9149 | 1.6957  | -5.4069 | H | -3.8481 | 1.6489  | -5.2315 |
| H | -3.5392 | 0.0032  | -6.1774 | H | -4.5029 | 2.6147  | -3.943  | H | -2.4795 | 2.6162  | -5.8815 |
| H | -1.1399 | 2.7415  | 0.0605  | H | 0.7091  | 3.2415  | 0.3845  | H | 0.5406  | 3.2484  | 0.173   |
| H | -0.2889 | 3.4197  | 1.4322  | H | 1.8116  | 3.008   | 1.7328  | H | 1.4208  | 3.1945  | 1.693   |
| H | -0.6377 | 1.6948  | 1.3887  | H | 0.5562  | 1.8082  | 1.4042  | H | 0.2555  | 1.9236  | 1.3048  |
| H | 0.5071  | 3.8597  | -1.4531 | H | 2.5189  | 3.5194  | -1.2653 | H | 2.5818  | 3.4148  | -1.1996 |

|             |         |         |             |   |         |             |         |   |         |         |         |
|-------------|---------|---------|-------------|---|---------|-------------|---------|---|---------|---------|---------|
| H           | 1.4603  | 4.4689  | -0.1265     | H | 3.7217  | 3.3811      | 0.0016  | H | 3.5709  | 3.4547  | 0.2466  |
| H           | 2.2309  | 3.4717  | -1.3653     | H | 3.8237  | 2.3425      | -1.4255 | H | 3.9183  | 2.2764  | -1.0248 |
| H           | 2.6657  | 5.8461  | 2.6609      | H | 3.0357  | -1.1117     | 4.9349  | H | 1.2449  | -1.1196 | 4.1011  |
| H           | 2.486   | 4.82    | 4.1258      | H | 1.7204  | 0.0259      | 4.5606  | H | 2.1926  | -0.5219 | 5.4717  |
| H           | 4.0842  | 5.4241  | 3.6412      | H | 1.862   | -1.5363     | 3.6796  | H | 0.9323  | 0.5201  | 4.7718  |
| H           | -1.5769 | -0.3007 | 6.771       | H | -1.3492 | 0.0424      | 6.8838  | H | -2.4811 | 0.8357  | 6.5293  |
| H           | 0.037   | -2.1859 | 6.7329      | H | -1.2719 | -2.4262     | 6.6387  | H | -2.3318 | -1.6401 | 6.621   |
| H           | 0.6094  | -3.2889 | 4.5936      | H | -1.2937 | -3.4532     | 4.3876  | H | -1.9744 | -2.9415 | 4.5471  |
| H           | -2.0676 | -0.6024 | 2.5203      | H | -1.463  | 0.4878      | 2.6187  | H | -1.9098 | 0.7383  | 2.2789  |
| H           | -2.6226 | 0.4825  | 4.6614      | H | -1.4462 | 1.4888      | 4.8694  | H | -2.2702 | 2.0137  | 4.3551  |
| <b>3A-4</b> |         |         | <b>3A-5</b> |   |         | <b>3A-6</b> |         |   |         |         |         |
| C           | -3.1071 | -1.7975 | -0.7902     | C | -2.718  | -1.5856     | -0.1507 | C | -3.0997 | -0.7898 | -0.0216 |
| C           | -1.7477 | -2.0435 | -0.1192     | C | -1.2948 | -2.1327     | 0.048   | C | -1.8686 | -1.7064 | 0.0756  |
| C           | -0.7576 | -1.2422 | -1.0061     | C | -0.3739 | -1.2883     | -0.8784 | C | -0.7927 | -1.0886 | -0.8614 |
| C           | -1.6228 | -0.1095 | -1.6295     | C | -1.3456 | -0.6933     | -1.9314 | C | -1.6087 | -0.1913 | -1.8265 |
| C           | -3.0511 | -0.3088 | -1.1276     | C | -2.7346 | -1.2546     | -1.642  | C | -3.0859 | -0.3741 | -1.4915 |
| C           | 0.5122  | -0.7004 | -0.279      | C | 0.5092  | -0.215      | -0.1544 | C | 0.382   | -0.3387 | -0.1481 |
| C           | -0.0336 | 0.5182  | -3.2628     | C | 0.314   | 0.1405      | -3.3936 | C | 0.1338  | 0.2398  | -3.3635 |
| C           | -1.4543 | -0.0453 | -3.156      | C | -0.8481 | -0.8534     | -3.3738 | C | -1.2497 | -0.4092 | -3.3007 |
| C           | -4.312  | -2.1569 | 0.0656      | C | -3.082  | -0.3912     | 0.7292  | C | -3.0919 | 0.4034  | 0.9328  |
| C           | 1.5225  | -1.7857 | 0.083       | C | 1.7326  | -0.7946     | 0.5621  | C | 1.4276  | -1.2689 | 0.4743  |
| C           | 2.3976  | -1.5966 | 1.0854      | C | 2.327   | -0.1186     | 1.5608  | C | 2.2291  | -0.836  | 1.4629  |
| C           | 2.543   | -0.309  | 1.8318      | C | 1.9235  | 1.2531      | 1.9984  | C | 2.2424  | 0.5695  | 1.9727  |
| C           | 3.0398  | 0.8193  | 0.9111      | C | 2.1789  | 2.3005      | 0.903   | C | 2.7321  | 1.5583  | 0.9027  |
| C           | 1.2139  | 0.5102  | -1.003      | C | 0.9419  | 1.0044      | -1.0574 | C | 1.0934  | 0.7595  | -1.0307 |
| C           | 0.1723  | 1.2391  | -1.9054     | C | -0.0386 | 1.131       | -2.2577 | C | 0.129   | 1.2191  | -2.1624 |
| C           | 1.5817  | -3.0594 | -0.7171     | C | 2.3054  | -2.1159     | 0.1227  | C | 1.5939  | -2.6711 | -0.0488 |
| C           | 0.2206  | 1.4447  | -4.4464     | C | 0.5422  | 0.8434      | -4.7274 | C | 0.4741  | 0.9433  | -4.6723 |
| O           | -2.4177 | 0.8723  | -3.7093     | O | -1.8597 | -0.4343     | -4.3116 | O | -2.201  | 0.2914  | -4.1256 |
| H           | -0.4658 | -1.9163 | -1.8217     | H | 0.2775  | -2.0027     | -1.396  | H | -0.3841 | -1.9206 | -1.4473 |
| O           | -1.0954 | 1.1575  | -1.2201     | O | -1.3372 | 0.7342      | -1.7745 | O | -1.2026 | 1.1676  | -1.615  |
| C           | -2.9314 | 0.5523  | -4.9264     | C | -2.5434 | -1.4196     | -4.9504 | C | -2.5157 | -0.289  | -5.3137 |
| C           | -3.9169 | 1.5958  | -5.3541     | C | -3.5581 | -0.8208     | -5.8747 | C | -3.52   | 0.5505  | -6.0414 |
| O           | -2.6376 | -0.4335 | -5.5866     | O | -2.3687 | -2.6197     | -4.7983 | O | -2.0502 | -1.3358 | -5.7398 |
| C           | 1.9564  | 1.5188  | -0.001      | C | 1.1126  | 2.3819      | -0.2583 | C | 1.6802  | 1.9919  | -0.1919 |
| C           | 0.9526  | 2.3122  | 0.8721      | C | -0.238  | 2.9082      | 0.2838  | C | 0.5569  | 2.844   | 0.4465  |
| C           | 2.738   | 2.5715  | -0.8484     | C | 1.6496  | 3.4691      | -1.2423 | C | 2.4558  | 2.9359  | -1.1645 |
| O           | 3.6446  | 1.8324  | 1.7619      | O | 2.2443  | 3.5985      | 1.5558  | O | 3.1887  | 2.7521  | 1.5967  |
| H           | 2.0059  | 0.1173  | -1.6571     | H | 1.94    | 0.7959      | -1.4706 | H | 1.9715  | 0.3049  | -1.5129 |
| C           | 4.9491  | 1.6479  | 2.1025      | C | 3.4471  | 3.9621      | 2.0781  | C | 4.4668  | 2.7386  | 2.0637  |
| C           | 5.4142  | 2.7822  | 2.963       | C | 3.3455  | 5.3275      | 2.6856  | C | 4.7809  | 4.0463  | 2.723   |
| O           | 5.6484  | 0.703   | 1.7682      | O | 4.4645  | 3.2851      | 2.0664  | O | 5.2505  | 1.8053  | 1.972   |
| H           | 0.1364  | -0.2945 | 0.6647      | H | -0.1447 | 0.1892      | 0.6252  | H | -0.0999 | 0.1883  | 0.6819  |
| O           | -1.7688 | -1.5132 | 1.2148      | O | -0.8849 | -2.1172     | 1.4155  | O | -1.4143 | -1.8787 | 1.4177  |
| C           | -1.4199 | -2.354  | 2.2186      | C | -1.3209 | -3.1503     | 2.1782  | C | -2.0809 | -2.8005 | 2.1562  |
| C           | -1.1102 | -0.2845 | 5.9611      | C | 0.0399  | -2.837      | 6.2317  | C | -0.523  | -3.0959 | 6.1394  |
| C           | -0.8464 | -1.6511 | 5.8793      | C | -0.6458 | -3.9705     | 5.797   | C | -1.5116 | -3.973  | 5.6953  |
| C           | -0.9561 | -2.3112 | 4.6539      | C | -1.0831 | -4.0572     | 4.4737  | C | -2.0093 | -3.8635 | 4.3952  |
| C           | -1.3321 | -1.6064 | 3.5025      | C | -0.8345 | -3.0092     | 3.5769  | C | -1.5182 | -2.8752 | 3.5312  |
| C           | -1.5956 | -0.2319 | 3.5926      | C | -0.1493 | -1.8713     | 4.0229  | C | -0.5281 | -1.9944 | 3.9867  |
| C           | -1.4839 | 0.425   | 4.8202      | C | 0.2878  | -1.7881     | 5.3469  | C | -0.0317 | -2.1074 | 5.2874  |
| O           | -1.1904 | -3.5478 | 2.1136      | O | -2.0099 | -4.0824     | 1.7949  | O | -3.0105 | -3.4907 | 1.7689  |
| H           | -3.1518 | -2.3732 | -1.7246     | H | -3.4511 | -2.3733     | 0.0623  | H | -4.0089 | -1.3646 | 0.1929  |
| H           | -1.5108 | -3.1121 | -0.1349     | H | -1.2571 | -3.1635     | -0.3349 | H | -2.1256 | -2.6863 | -0.3537 |
| H           | -3.816  | -0.0432 | -1.8635     | H | -2.8916 | -2.1878     | -2.1949 | H | -3.511  | -1.1889 | -2.091  |
| H           | -3.2351 | 0.3085  | -0.2391     | H | -3.539  | -0.5578     | -1.8991 | H | -3.678  | 0.5299  | -1.6673 |
| H           | 0.6742  | -0.3157 | -3.3524     | H | 1.2411  | -0.3946     | -3.1509 | H | 0.895   | -0.5357 | -3.2097 |
| H           | -1.5445 | -1.0385 | -3.61       | H | -0.4949 | -1.8666     | -3.5961 | H | -1.2219 | -1.4767 | -3.5473 |
| H           | -4.3589 | -1.5599 | 0.9822      | H | -2.4036 | 0.4537      | 0.5961  | H | -2.2138 | 1.0396  | 0.8053  |
| H           | -5.2397 | -1.9828 | -0.4896     | H | -4.0929 | -0.0415     | 0.4933  | H | -3.9773 | 1.0267  | 0.7672  |
| H           | -4.2807 | -3.2137 | 0.3495      | H | -3.0703 | -0.6675     | 1.7883  | H | -3.1168 | 0.0705  | 1.9753  |
| H           | 3.1161  | -2.3748 | 1.3383      | H | 3.1991  | -0.5378     | 2.0604  | H | 2.9729  | -1.5038 | 1.8952  |
| H           | 1.6205  | -0.0395 | 2.3561      | H | 0.8874  | 1.2727      | 2.3519  | H | 1.2688  | 0.8568  | 2.3833  |
| H           | 3.2695  | -0.4772 | 2.6374      | H | 2.5135  | 1.4982      | 2.8911  | H | 2.9152  | 0.5968  | 2.8397  |
| H           | 3.8149  | 0.4226  | 0.2392      | H | 3.152   | 2.0991      | 0.4315  | H | 3.5874  | 1.1182  | 0.3692  |
| H           | 0.3944  | 2.2948  | -2.0595     | H | -0.129  | 2.1453      | -2.6445 | H | 0.3047  | 2.2405  | -2.4979 |

|             |         |         |         |             |         |         |         |             |         |         |         |
|-------------|---------|---------|---------|-------------|---------|---------|---------|-------------|---------|---------|---------|
| H           | 0.684   | -3.6637 | -0.5655 | H           | 1.602   | -2.932  | 0.3115  | H           | 0.7014  | -3.2725 | 0.1465  |
| H           | 1.6873  | -2.8336 | -1.7832 | H           | 2.5475  | -2.0887 | -0.9447 | H           | 1.788   | -2.6539 | -1.1262 |
| H           | 2.4387  | -3.682  | -0.4368 | H           | 3.2314  | -2.3612 | 0.6545  | H           | 2.4382  | -3.1887 | 0.42    |
| H           | 1.2646  | 1.7762  | -4.4512 | H           | 1.4218  | 1.4934  | -4.6681 | H           | 1.4871  | 1.3578  | -4.6278 |
| H           | -0.4088 | 2.3399  | -4.4094 | H           | -0.3103 | 1.4681  | -5.0137 | H           | -0.2114 | 1.7705  | -4.8834 |
| H           | 0.0305  | 0.9273  | -5.392  | H           | 0.7155  | 0.1129  | -5.5243 | H           | 0.4379  | 0.2415  | -5.5113 |
| H           | -4.3365 | 1.3213  | -6.3262 | H           | -4.0904 | -1.6213 | -6.3963 | H           | -3.783  | 0.0644  | -6.9852 |
| H           | -4.7317 | 1.6557  | -4.6282 | H           | -4.2817 | -0.2362 | -5.301  | H           | -4.4259 | 0.6509  | -5.4382 |
| H           | -3.4147 | 2.5616  | -5.4506 | H           | -3.0586 | -0.1939 | -6.6176 | H           | -3.0923 | 1.5319  | -6.2609 |
| H           | 0.2632  | 2.9033  | 0.2609  | H           | -0.9693 | 3.0472  | -0.5187 | H           | -0.1385 | 3.2269  | -0.3073 |
| H           | 1.4663  | 3.0247  | 1.5273  | H           | -0.1222 | 3.8854  | 0.7663  | H           | 0.9636  | 3.7212  | 0.9623  |
| H           | 0.3506  | 1.6632  | 1.5123  | H           | -0.6821 | 2.2374  | 1.0226  | H           | -0.0276 | 2.2837  | 1.1797  |
| H           | 2.0806  | 3.2226  | -1.4298 | H           | 0.9211  | 3.7456  | -2.0088 | H           | 1.8013  | 3.4408  | -1.8794 |
| H           | 3.3343  | 3.2406  | -0.2181 | H           | 1.8975  | 4.4021  | -0.7242 | H           | 2.976   | 3.7369  | -0.6276 |
| H           | 3.4241  | 2.0778  | -1.5457 | H           | 2.5579  | 3.1226  | -1.7479 | H           | 3.2089  | 2.3773  | -1.7315 |
| H           | 5.3201  | 3.7243  | 2.417   | H           | 4.3205  | 5.6195  | 3.0861  | H           | 4.6706  | 4.8605  | 2.0023  |
| H           | 4.8291  | 2.8114  | 3.8855  | H           | 3.0528  | 6.0521  | 1.9215  | H           | 5.8153  | 4.0341  | 3.0781  |
| H           | 6.4666  | 2.6335  | 3.2213  | H           | 2.6209  | 5.3159  | 3.5036  | H           | 4.1192  | 4.1975  | 3.5795  |
| H           | -1.0241 | 0.2287  | 6.916   | H           | 0.3806  | -2.7704 | 7.2621  | H           | -0.1355 | -3.1822 | 7.1517  |
| H           | -0.5539 | -2.2038 | 6.7688  | H           | -0.8407 | -4.7874 | 6.4875  | H           | -1.8958 | -4.7426 | 6.3604  |
| H           | -0.7441 | -3.3775 | 4.5991  | H           | -1.618  | -4.946  | 4.144   | H           | -2.7813 | -4.5527 | 4.058   |
| H           | -1.8849 | 0.3419  | 2.7152  | H           | 0.049   | -1.041  | 3.3509  | H           | -0.1355 | -1.2143 | 3.3406  |
| H           | -1.6882 | 1.4909  | 4.8854  | H           | 0.8213  | -0.904  | 5.6872  | H           | 0.7384  | -1.4231 | 5.6352  |
| <b>3A-7</b> |         |         |         | <b>3A-8</b> |         |         |         | <b>3A-9</b> |         |         |         |
| C           | -3.1001 | -1.1019 | 0.0581  | C           | -3.2734 | -0.5805 | 0.3009  | C           | -2.416  | -2.1247 | -1.0498 |
| C           | -1.7832 | -1.8716 | 0.2535  | C           | -2.0934 | -1.5669 | 0.3198  | C           | -1.2271 | -1.9187 | -0.1022 |
| C           | -0.7741 | -1.2766 | -0.7735 | C           | -1.0774 | -1.0538 | -0.7426 | C           | -0.2191 | -1.167  | -1.0065 |
| C           | -1.6746 | -0.5629 | -1.8168 | C           | -1.9164 | -0.1069 | -1.6384 | C           | -1.1205 | -0.212  | -1.8195 |
| C           | -3.1235 | -0.8691 | -1.4512 | C           | -3.3667 | -0.203  | -1.1762 | C           | -2.5492 | -0.7721 | -1.7546 |
| C           | 0.3306  | -0.3525 | -0.1588 | C           | 0.2148  | -0.3866 | -0.166  | C           | 0.9639  | -0.469  | -0.2504 |
| C           | 0.0322  | -0.0679 | -3.3762 | C           | -0.294  | 0.2345  | -3.3234 | C           | 0.0861  | 1.471   | -3.067  |
| C           | -1.2746 | -0.8551 | -3.2685 | C           | -1.699  | -0.3401 | -3.1374 | C           | -0.4778 | 0.0554  | -3.2083 |
| C           | -3.2243 | 0.1891  | 0.8654  | C           | -3.1168 | 0.6319  | 1.2177  | C           | -3.7035 | -2.5587 | -0.3653 |
| C           | 1.4952  | -1.1087 | 0.4817  | C           | 1.2717  | -1.3824 | 0.3137  | C           | 2.2025  | -1.4027 | -0.1426 |
| C           | 2.2225  | -0.5359 | 1.4566  | C           | 2.1631  | -1.0262 | 1.2548  | C           | 3.4821  | -0.9976 | -0.003  |
| C           | 2.0427  | 0.8818  | 1.9014  | C           | 2.276   | 0.3599  | 1.8072  | C           | 4.0181  | 0.3738  | 0.2865  |
| C           | 2.3989  | 1.8775  | 0.7814  | C           | 2.7179  | 1.3649  | 0.7271  | C           | 3.0867  | 1.2883  | 1.098   |
| C           | 0.8991  | 0.7637  | -1.1112 | C           | 0.8947  | 0.6914  | -1.09   | C           | 1.3123  | 0.9652  | -0.8312 |
| C           | -0.1019 | 1.0092  | -2.2724 | C           | -0.1391 | 1.2092  | -2.1283 | C           | 0.112   | 1.6634  | -1.5482 |
| C           | 1.8872  | -2.4654 | -0.0401 | C           | 1.3722  | -2.7398 | -0.33   | C           | 1.9765  | -2.9019 | -0.1043 |
| C           | 0.3131  | 0.5375  | -4.7471 | C           | -0.0334 | 0.9229  | -4.6583 | C           | -0.7796 | 2.5438  | -3.738  |
| O           | -2.2432 | -0.3082 | -4.1861 | O           | -2.6799 | 0.4134  | -3.8773 | O           | -1.3747 | -0.032  | -4.3226 |
| H           | -0.3056 | -2.1331 | -1.2722 | H           | -0.803  | -1.926  | -1.3474 | H           | 0.1682  | -1.9085 | -1.7157 |
| O           | -1.4234 | 0.8486  | -1.7212 | O           | -1.4173 | 1.2269  | -1.4647 | O           | -1.1043 | 1.0504  | -1.1267 |
| C           | -3.1215 | -1.185  | -4.739  | C           | -3.1295 | -0.1456 | -5.0318 | C           | -1.5304 | -1.2781 | -4.8493 |
| C           | -4.0563 | -0.4608 | -5.6579 | C           | -4.1443 | 0.7513  | -5.6711 | C           | -2.4488 | -1.2256 | -6.0308 |
| O           | -3.1577 | -2.3874 | -4.5222 | O           | -2.7637 | -1.2161 | -5.4942 | O           | -1.0151 | -2.2979 | -4.4141 |
| C           | 1.3118  | 2.1086  | -0.3439 | C           | 1.6051  | 1.8744  | -0.2744 | C           | 1.9596  | 1.951   | 0.2413  |
| C           | 0.0834  | 2.8471  | 0.2393  | C           | 0.5804  | 2.7648  | 0.4691  | C           | 0.8968  | 2.534   | 1.2097  |
| C           | 1.9686  | 3.0855  | -1.3687 | C           | 2.3452  | 2.8032  | -1.2872 | C           | 2.6078  | 3.1484  | -0.5126 |
| O           | 2.6768  | 3.1564  | 1.4158  | O           | 3.2741  | 2.5191  | 1.4157  | O           | 2.4979  | 0.5643  | 2.206   |
| H           | 1.8356  | 0.402   | -1.5613 | H           | 1.7091  | 0.2118  | -1.6532 | H           | 2.0813  | 0.8195  | -1.6032 |
| C           | 3.9422  | 3.3499  | 1.8774  | C           | 4.5856  | 2.4476  | 1.7716  | C           | 3.2879  | 0.3184  | 3.2825  |
| C           | 4.0603  | 4.7172  | 2.4774  | C           | 4.9991  | 3.72    | 2.4451  | C           | 2.5236  | -0.4728 | 4.2995  |
| O           | 4.8546  | 2.5387  | 1.8225  | O           | 5.3264  | 1.4942  | 1.5821  | O           | 4.4435  | 0.693   | 3.42    |
| H           | -0.1886 | 0.1721  | 0.6493  | H           | -0.1407 | 0.1494  | 0.7196  | H           | 0.6319  | -0.3178 | 0.7799  |
| O           | -1.3502 | -1.7848 | 1.6126  | O           | -1.5501 | -1.6747 | 1.637   | O           | -1.6362 | -1.0957 | 1.0019  |
| C           | -0.9241 | -2.9252 | 2.2055  | C           | -1.3108 | -2.9195 | 2.1132  | C           | -1.336  | -1.5277 | 2.249   |
| C           | 0.5049  | -2.2035 | 6.1837  | C           | 0.5291  | -2.808  | 5.985   | C           | -2.4965 | 1.3328  | 5.2236  |
| C           | 0.5385  | -3.4856 | 5.6369  | C           | 0.2668  | -4.0244 | 5.3563  | C           | -1.9455 | 0.1063  | 5.5928  |
| C           | 0.0666  | -3.7044 | 4.3411  | C           | -0.3355 | -4.0437 | 4.0967  | C           | -1.5769 | -0.8166 | 4.6121  |
| C           | -0.4427 | -2.64   | 3.5848  | C           | -0.6795 | -2.844  | 3.459   | C           | -1.7593 | -0.5167 | 3.2552  |
| C           | -0.4741 | -1.3539 | 4.1422  | C           | -0.4134 | -1.6249 | 4.0983  | C           | -2.3142 | 0.7185  | 2.8915  |
| C           | -0.0002 | -1.1386 | 5.4384  | C           | 0.1902  | -1.6095 | 5.3578  | C           | -2.6806 | 1.6394  | 3.8756  |
| O           | -0.9118 | -4.0376 | 1.7031  | O           | -1.5549 | -3.9692 | 1.54    | O           | -0.7876 | -2.5786 | 2.5392  |
| H           | -3.9434 | -1.7403 | 0.3501  | H           | -4.1891 | -1.0983 | 0.6124  | H           | -2.1439 | -2.8838 | -1.7955 |

|   |         |         |         |   |         |         |         |   |         |         |         |
|---|---------|---------|---------|---|---------|---------|---------|---|---------|---------|---------|
| H | -1.978  | -2.914  | -0.0354 | H | -2.4816 | -2.5333 | -0.0314 | H | -0.8449 | -2.8896 | 0.2243  |
| H | -3.4513 | -1.7967 | -1.9341 | H | -3.8825 | -1.0078 | -1.7149 | H | -3.0304 | -0.9016 | -2.726  |
| H | -3.8136 | -0.0668 | -1.7315 | H | -3.9247 | 0.7271  | -1.3261 | H | -3.1969 | -0.0992 | -1.1778 |
| H | 0.8687  | -0.7402 | -3.1456 | H | 0.4347  | -0.5816 | -3.2365 | H | 1.0913  | 1.5442  | -3.4978 |
| H | -1.1029 | -1.92   | -3.4619 | H | -1.7504 | -1.4066 | -3.3838 | H | 0.3737  | -0.6133 | -3.3919 |
| H | -2.4041 | 0.8842  | 0.6769  | H | -2.2048 | 1.1972  | 1.0157  | H | -4.059  | -1.8128 | 0.3532  |
| H | -4.1589 | 0.7039  | 0.6184  | H | -3.9647 | 1.3142  | 1.0948  | H | -4.4966 | -2.7111 | -1.1048 |
| H | -3.242  | -0.0243 | 1.9393  | H | -3.0941 | 0.3242  | 2.2683  | H | -3.5547 | -3.5015 | 0.1709  |
| H | 3.0593  | -1.0716 | 1.9021  | H | 2.9223  | -1.7333 | 1.5856  | H | 4.2644  | -1.7581 | 0.0262  |
| H | 1.039   | 1.0564  | 2.3024  | H | 1.354   | 0.6731  | 2.3076  | H | 4.9268  | 0.2223  | 0.8842  |
| H | 2.7051  | 1.0412  | 2.7621  | H | 3.0206  | 0.3315  | 2.6132  | H | 4.3556  | 0.8468  | -0.6411 |
| H | 3.3131  | 1.534   | 0.2753  | H | 3.5111  | 0.9087  | 0.1167  | H | 3.6935  | 2.0984  | 1.5268  |
| H | -0.0397 | 2.0106  | -2.6973 | H | 0.0652  | 2.2209  | -2.4777 | H | 0.0474  | 2.7279  | -1.3217 |
| H | 1.1098  | -3.2076 | 0.153   | H | 0.491   | -3.3488 | -0.117  | H | 1.2887  | -3.1595 | 0.7048  |
| H | 2.0694  | -2.416  | -1.1187 | H | 1.4772  | -2.6356 | -1.4149 | H | 1.5908  | -3.2804 | -1.0539 |
| H | 2.8078  | -2.835  | 0.4251  | H | 2.2441  | -3.3002 | 0.0252  | H | 2.8995  | -3.459  | 0.095   |
| H | 1.2894  | 1.034   | -4.7497 | H | 1.0005  | 1.2817  | -4.7045 | H | -0.3797 | 3.5426  | -3.5324 |
| H | -0.4369 | 1.2844  | -5.0279 | H | -0.689  | 1.7868  | -4.809  | H | -1.8142 | 2.5157  | -3.3792 |
| H | 0.3281  | -0.2404 | -5.5173 | H | -0.1819 | 0.2269  | -5.4898 | H | -0.7897 | 2.4138  | -4.8252 |
| H | -4.745  | -1.178  | -6.1134 | H | -4.5152 | 0.2837  | -6.5877 | H | -2.0483 | -0.54   | -6.7819 |
| H | -4.6378 | 0.2713  | -5.0921 | H | -4.9873 | 0.9008  | -4.9918 | H | -2.5233 | -2.2217 | -6.4762 |
| H | -3.4888 | 0.0292  | -6.4532 | H | -3.6827 | 1.7078  | -5.9288 | H | -3.4443 | -0.908  | -5.7112 |
| H | -0.6583 | 3.0716  | -0.5336 | H | -0.1625 | 3.1852  | -0.2159 | H | 0.2063  | 3.2235  | 0.7156  |
| H | 0.3674  | 3.8094  | 0.6804  | H | 1.0687  | 3.6184  | 0.9529  | H | 1.3769  | 3.1044  | 2.014   |
| H | -0.4162 | 2.2732  | 1.0227  | H | 0.0425  | 2.2212  | 1.2489  | H | 0.2966  | 1.7472  | 1.6748  |
| H | 1.2595  | 3.4569  | -2.1131 | H | 1.6594  | 3.3515  | -1.9383 | H | 1.873   | 3.7531  | -1.0518 |
| H | 2.3759  | 3.977   | -0.8788 | H | 2.9428  | 3.5676  | -0.778  | H | 3.1142  | 3.8255  | 0.1854  |
| H | 2.7928  | 2.5971  | -1.9002 | H | 3.0246  | 2.2242  | -1.9226 | H | 3.35    | 2.8103  | -1.2429 |
| H | 5.0839  | 4.8707  | 2.8312  | H | 4.8594  | 4.5625  | 1.7631  | H | 3.1921  | -0.7521 | 5.1187  |
| H | 3.8368  | 5.4742  | 1.7215  | H | 4.4156  | 3.8623  | 3.3581  | H | 1.7069  | 0.1326  | 4.7     |
| H | 3.3796  | 4.8087  | 3.3275  | H | 6.058   | 3.661   | 2.7126  | H | 2.1362  | -1.388  | 3.844   |
| H | 0.8738  | -2.0339 | 7.1924  | H | 0.9995  | -2.7941 | 6.9653  | H | -2.7829 | 2.0515  | 5.9877  |
| H | 0.933   | -4.3155 | 6.2179  | H | 0.5321  | -4.9586 | 5.8452  | H | -1.8027 | -0.1321 | 6.6439  |
| H | 0.0994  | -4.7084 | 3.9222  | H | -0.5336 | -4.9984 | 3.613   | H | -1.1463 | -1.7709 | 4.9095  |
| H | -0.8601 | -0.5094 | 3.5771  | H | -0.6658 | -0.6792 | 3.6253  | H | -2.4581 | 0.9813  | 1.8453  |
| H | -0.0243 | -0.1393 | 5.866   | H | 0.3971  | -0.6619 | 5.849   | H | -3.1079 | 2.5972  | 3.5887  |

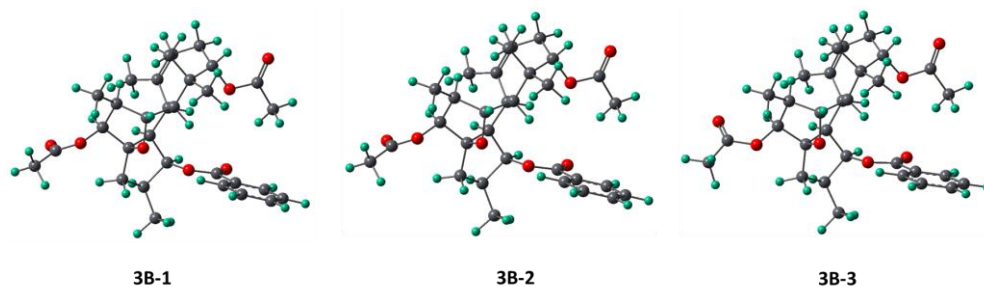

**Figure S15.** Key conformers of isomer **3B**.

**Table S13.** Important thermodynamic parameters and Boltzmann distributions of the optimized isomer **3B** at B3LYP/6-31G\* level in the gas phase.

| Conformations | Energy (a.u) | $\Delta G$ (kcal/mol) | %      | Number of imaginary frequencies |
|---------------|--------------|-----------------------|--------|---------------------------------|
| <b>3B-1</b>   | -1731.977572 | 3.13751E-05           | 33.83% | 0                               |
| <b>3B-2</b>   | -1731.977572 | 0                     | 33.83% | 0                               |
| <b>3B-3</b>   | -1731.977529 | 0.026907324           | 32.33% | 0                               |

**Table S14.** Optimized Z-matrixes of isomer **3B** in the gas phase (Å) at B3LYP/6-31G\* level.

| <b>3B-1</b> |         |         | <b>3B-2</b> |   |         | <b>3B-3</b> |         |   |         |         |        |
|-------------|---------|---------|-------------|---|---------|-------------|---------|---|---------|---------|--------|
| C           | -2.2229 | -1.4161 | 2.2411      | C | -2.7473 | -1.1692     | 1.7606  | C | -2.3283 | -1.4112 | 2.2026 |
| C           | -0.8373 | -1.5409 | 1.5865      | C | -1.2604 | -1.397      | 1.4487  | C | -0.8987 | -1.521  | 1.6436 |
| C           | -1.1651 | -1.3267 | 0.0874      | C | -1.2328 | -1.2633     | -0.0924 | C | -1.1352 | -1.371  | 0.1206 |
| C           | -2.1545 | -0.1378 | 0.139       | C | -2.1327 | -0.0257     | -0.3288 | C | -2.1514 | -0.2062 | 0.067  |

|   |         |         |         |   |         |         |         |   |         |         |         |
|---|---------|---------|---------|---|---------|---------|---------|---|---------|---------|---------|
| C | -2.9774 | -0.3522 | 1.4164  | C | -3.215  | -0.0939 | 0.7587  | C | -3.0514 | -0.394  | 1.2952  |
| C | 0.1056  | -1.1388 | -0.8158 | C | 0.2157  | -1.2026 | -0.6941 | C | 0.1808  | -1.184  | -0.7139 |
| C | -1.8863 | 0.853   | -2.025  | C | -1.3539 | 0.7671  | -2.45   | C | -1.799  | 0.6986  | -2.1199 |
| C | -2.9265 | 0.1165  | -1.1575 | C | -2.6002 | 0.1621  | -1.7742 | C | -2.8604 | -0.0352 | -1.2768 |
| C | -2.2156 | -1.103  | 3.7302  | C | -3.0593 | -0.8005 | 3.2035  | C | -2.4252 | -1.0494 | 3.6774  |
| C | 0.1279  | -1.9748 | -2.1061 | C | 0.4758  | -2.1555 | -1.872  | C | 0.3023  | -2.0727 | -1.9626 |
| C | 1.2195  | -2.1107 | -2.8851 | C | 1.7072  | -2.4227 | -2.3492 | C | 1.4448  | -2.215  | -2.6637 |
| C | 2.5753  | -1.474  | -2.8117 | C | 3.0469  | -1.8411 | -2.0063 | C | 2.7771  | -1.539  | -2.5332 |
| C | 2.8038  | -0.2304 | -1.939  | C | 3.1468  | -0.5011 | -1.2599 | C | 2.9153  | -0.2454 | -1.7157 |
| C | 0.4717  | 0.3844  | -0.9606 | C | 0.6967  | 0.2837  | -0.8761 | C | 0.5125  | 0.3411  | -0.9076 |
| C | -0.797  | 1.276   | -1.02   | C | -0.4751 | 1.2222  | -1.2684 | C | -0.7738 | 1.1927  | -1.0774 |
| C | -1.0657 | -2.8258 | -2.482  | C | -0.6582 | -2.9644 | -2.4632 | C | -0.8484 | -2.9618 | -2.3812 |
| C | -2.455  | 2.0491  | -2.7899 | C | -1.6675 | 1.9179  | -3.4072 | C | -2.3503 | 1.8533  | -2.9568 |
| O | -4.0529 | 0.9869  | -0.9095 | O | -3.6878 | 1.1119  | -1.8295 | O | -4.0334 | 0.7851  | -1.084  |
| H | -1.7317 | -2.2153 | -0.208  | H | -1.7768 | -2.1387 | -0.4604 | H | -1.6616 | -2.2843 | -0.1739 |
| O | -1.4167 | 1.0921  | 0.2707  | O | -1.3595 | 1.1727  | -0.1281 | O | -1.457  | 1.0474  | 0.1856  |
| C | -5.2842 | 0.4117  | -0.9086 | C | -4.9326 | 0.6098  | -2.0404 | C | -5.1274 | 0.4664  | -1.8251 |
| C | -6.3321 | 1.4501  | -0.6505 | C | -5.9335 | 1.7236  | -2.0684 | C | -6.2508 | 1.4034  | -1.5038 |
| O | -5.5151 | -0.7763 | -1.0813 | O | -5.209  | -0.5731 | -2.177  | O | -5.1965 | -0.4425 | -2.6395 |
| C | 1.6393  | 0.8104  | -1.927  | C | 2.0603  | 0.5648  | -1.6123 | C | 1.7222  | 0.7572  | -1.8254 |
| C | 1.1763  | 1.1363  | -3.3608 | C | 1.9281  | 0.7324  | -3.1386 | C | 1.3352  | 0.9967  | -3.2981 |
| C | 2.2526  | 2.1349  | -1.3691 | C | 2.6105  | 1.9287  | -1.084  | C | 2.2625  | 2.1265  | -1.3015 |
| O | 3.1246  | -0.6085 | -0.5796 | O | 3.167   | -0.7198 | 0.1716  | O | 3.1648  | -0.5437 | -0.3217 |
| H | 0.8888  | 0.6063  | 0.0334  | H | 0.9131  | 0.5762  | 0.1641  | H | 0.866   | 0.6183  | 0.0975  |
| C | 4.3977  | -1.0278 | -0.3468 | C | 4.3565  | -1.1081 | 0.7083  | C | 4.434   | -0.9065 | 0.0075  |
| C | 4.5711  | -1.3662 | 1.1011  | C | 4.2241  | -1.2897 | 2.1876  | C | 4.5299  | -1.1628 | 1.4793  |
| O | 5.2869  | -1.1003 | -1.1832 | O | 5.3982  | -1.265  | 0.0869  | O | 5.3738  | -0.9923 | -0.7702 |
| H | 0.916   | -1.6002 | -0.2322 | H | 0.852   | -1.6357 | 0.0923  | H | 0.9677  | -1.5946 | -0.0638 |
| O | 0.0428  | -0.5217 | 2.0757  | O | -0.4638 | -0.3816 | 2.0695  | O | -0.0772 | -0.46   | 2.1452  |
| C | 1.0262  | -0.8971 | 2.9248  | C | 0.343   | -0.7512 | 3.0893  | C | 0.8524  | -0.7747 | 3.0757  |
| C | 3.3532  | 2.4617  | 4.2238  | C | 2.3574  | 2.6416  | 4.7633  | C | 3.0281  | 2.688   | 4.3639  |
| C | 2.2814  | 2.6709  | 3.3567  | C | 1.492   | 2.8368  | 3.6871  | C | 2.0129  | 2.8346  | 3.4192  |
| C | 1.5074  | 1.5908  | 2.9266  | C | 0.8092  | 1.7523  | 3.1321  | C | 1.2883  | 1.72    | 2.9911  |
| C | 1.8076  | 0.292   | 3.361   | C | 1.0395  | 0.441   | 3.644   | C | 1.5816  | 0.4492  | 3.5057  |
| C | 2.8827  | 0.0916  | 4.2379  | C | 1.8584  | 0.2776  | 4.7398  | C | 2.5994  | 0.3118  | 4.4598  |
| C | 3.6535  | 1.1741  | 4.6663  | C | 2.5407  | 1.3639  | 5.2904  | C | 3.3208  | 1.4287  | 4.8859  |
| O | 1.2644  | -2.0349 | 3.2963  | O | 0.4968  | -1.8833 | 3.5154  | O | 1.0844  | -1.8889 | 3.5163  |
| H | -2.7457 | -2.3727 | 2.0998  | H | -3.2864 | -2.0976 | 1.5245  | H | -2.8182 | -2.3848 | 2.0604  |
| H | -0.4198 | -2.5434 | 1.7367  | H | -0.9471 | -2.4042 | 1.7458  | H | -0.4661 | -2.5052 | 1.8583  |
| H | -3.9749 | -0.7468 | 1.1997  | H | -4.1837 | -0.4098 | 0.3605  | H | -4.027  | -0.8118 | 1.0202  |
| H | -3.0978 | 0.5833  | 1.9745  | H | -3.3512 | 0.8791  | 1.2448  | H | -3.2244 | 0.5574  | 1.811   |
| H | -1.4708 | 0.1703  | -2.7701 | H | -0.8366 | 0.0017  | -3.0335 | H | -1.3253 | 0.0013  | -2.8151 |
| H | -3.2557 | -0.8067 | -1.6399 | H | -2.8866 | -0.7786 | -2.251  | H | -3.1382 | -1.005  | -1.6966 |
| H | -1.6552 | -1.8638 | 4.2827  | H | -2.6935 | -1.5736 | 3.887   | H | -1.8852 | -1.7778 | 4.2906  |
| H | -1.7671 | -0.1265 | 3.94    | H | -2.6036 | 0.1531  | 3.4898  | H | -2.0131 | -0.0559 | 3.8821  |
| H | -3.2382 | -1.0879 | 4.122   | H | -4.141  | -0.7069 | 3.3484  | H | -3.4712 | -1.0466 | 4.0017  |
| H | 1.1535  | -2.794  | -3.7349 | H | 1.7951  | -3.1811 | -3.1312 | H | 1.4486  | -2.9338 | -3.4863 |
| H | 3.2869  | -2.2626 | -2.5402 | H | 3.6103  | -2.6167 | -1.4738 | H | 3.4875  | -2.2926 | -2.1736 |
| H | 2.8236  | -1.1869 | -3.843  | H | 3.5605  | -1.7029 | -2.968  | H | 3.0876  | -1.2983 | -3.5596 |
| H | 3.6862  | 0.2769  | -2.3563 | H | 4.119   | -0.0706 | -1.5412 | H | 3.8059  | 0.2685  | -2.1066 |
| H | -0.5394 | 2.3346  | -1.1032 | H | -0.1434 | 2.2584  | -1.3696 | H | -0.5389 | 2.2535  | -1.1928 |
| H | -0.9289 | -3.341  | -3.44   | H | -0.3427 | -3.5567 | -3.3303 | H | -0.6392 | -3.5112 | -3.3065 |
| H | -1.2372 | -3.6056 | -1.7336 | H | -1.0525 | -3.6745 | -1.7296 | H | -1.0558 | -3.7153 | -1.615  |
| H | -1.9644 | -2.2195 | -2.5941 | H | -1.4616 | -2.3182 | -2.8178 | H | -1.7481 | -2.3785 | -2.5769 |
| H | -2.8116 | 2.8341  | -2.1144 | H | -0.7581 | 2.2711  | -3.9021 | H | -2.7963 | 2.6345  | -2.332  |
| H | -3.2874 | 1.7384  | -3.4299 | H | -2.1075 | 2.7748  | -2.8861 | H | -3.1083 | 1.4957  | -3.6608 |
| H | -1.6922 | 2.4962  | -3.4342 | H | -2.3633 | 1.5925  | -4.1874 | H | -1.5546 | 2.3216  | -3.544  |
| H | -6.2877 | 2.2217  | -1.4234 | H | -6.9297 | 1.3114  | -2.2522 | H | -5.9643 | 2.4263  | -1.7606 |
| H | -7.3206 | 0.9833  | -0.6824 | H | -5.941  | 2.2382  | -1.1042 | H | -7.1313 | 1.1288  | -2.0917 |
| H | -6.1832 | 1.8876  | 0.3398  | H | -5.6907 | 2.4201  | -2.8748 | H | -6.5039 | 1.3286  | -0.4432 |
| H | 0.5943  | 0.3327  | -3.8159 | H | 1.4181  | -0.1024 | -3.6208 | H | 0.8034  | 0.1542  | -3.7441 |
| H | 0.5611  | 2.0406  | -3.3862 | H | 1.3772  | 1.6415  | -3.3936 | H | 0.697   | 1.8789  | -3.4052 |
| H | 2.0369  | 1.3268  | -4.0131 | H | 2.9155  | 0.8251  | -3.605  | H | 2.2269  | 1.1812  | -3.909  |
| H | 3.0928  | 2.4705  | -1.9887 | H | 3.5868  | 2.1569  | -1.5287 | H | 3.13    | 2.4561  | -1.8858 |
| H | 1.5248  | 2.9518  | -1.3539 | H | 1.9496  | 2.7646  | -1.3328 | H | 1.513   | 2.9205  | -1.3735 |
| H | 2.6301  | 2.0075  | -0.3484 | H | 2.7408  | 1.9199  | 0.0043  | H | 2.5791  | 2.0628  | -0.2544 |

|   |        |         |        |   |        |         |        |   |        |         |        |
|---|--------|---------|--------|---|--------|---------|--------|---|--------|---------|--------|
| H | 5.5059 | -1.9179 | 1.2344 | H | 3.2999 | -1.824  | 2.4189 | H | 5.4737 | -1.6704 | 1.6975 |
| H | 4.6105 | -0.4466 | 1.6886 | H | 5.059  | -1.8934 | 2.5526 | H | 4.5006 | -0.2134 | 2.0177 |
| H | 3.7507 | -2.0054 | 1.4375 | H | 4.2399 | -0.315  | 2.6781 | H | 3.7134 | -1.815  | 1.8001 |
| H | 3.9531 | 3.3048  | 4.5586 | H | 2.8869 | 3.4881  | 5.1942 | H | 3.5894 | 3.5578  | 4.6969 |
| H | 2.0446 | 3.6761  | 3.0162 | H | 1.3455 | 3.8345  | 3.28   | H | 1.7819 | 3.8178  | 3.0164 |
| H | 0.6722 | 1.7778  | 2.2545 | H | 0.1367 | 1.9278  | 2.2945 | H | 0.4967 | 1.8584  | 2.2574 |
| H | 3.1244 | -0.9097 | 4.5894 | H | 2.0064 | -0.7157 | 5.1591 | H | 2.8349 | -0.667  | 4.8736 |
| H | 4.4865 | 1.0124  | 5.346  | H | 3.2132 | 1.2133  | 6.1314 | H | 4.1094 | 1.3159  | 5.6259 |

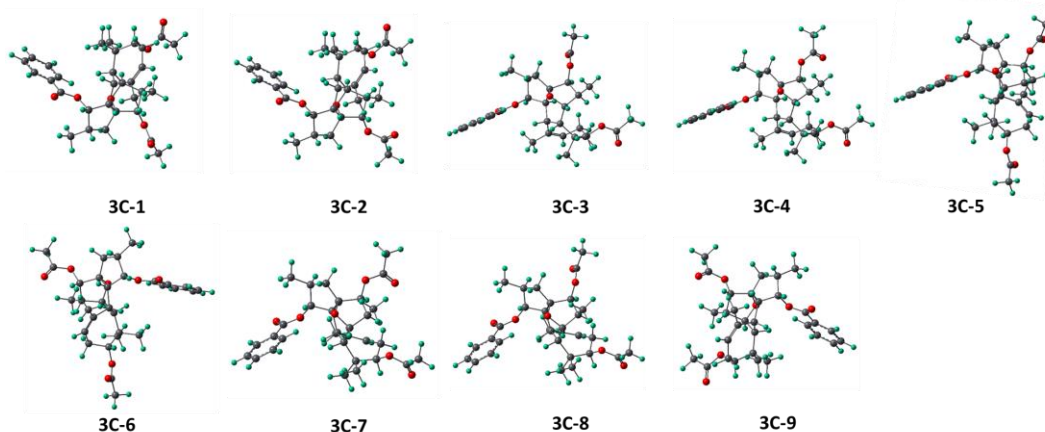

Figure S16. Key conformers of isomer **3C**.

Table S15. Important thermodynamic parameters and Boltzmann distributions of the optimized isomer **3C** at B3LYP/6-31G\* level in the gas phase.

| Conformations | Energy (a.u) | $\Delta G(\text{kcal/mol})$ | %      | Number of imaginary frequencies |
|---------------|--------------|-----------------------------|--------|---------------------------------|
| <b>3C-1</b>   | -1731.97338  | 0                           | 26.98% | 0                               |
| <b>3C-2</b>   | -1731.973347 | 0.020745246                 | 26.05% | 0                               |
| <b>3C-3</b>   | -1731.9723   | 0.677765882                 | 8.59%  | 0                               |
| <b>3C-4</b>   | -1731.972226 | 0.724201097                 | 7.94%  | 0                               |
| <b>3C-5</b>   | -1731.970019 | 2.108968222                 | 0.77%  | 0                               |
| <b>3C-6</b>   | -1731.970043 | 2.093701076                 | 0.79%  | 0                               |
| <b>3C-7</b>   | -1731.970696 | 1.683791082                 | 1.57%  | 0                               |
| <b>3C-8</b>   | -1731.970502 | 1.805928246                 | 1.28%  | 0                               |
| <b>3C-9</b>   | -1731.973347 | 0.020751521                 | 26.05% | 0                               |

Table S16. Optimized Z-matrixes of isomer **3C** in the gas phase ( $\text{\AA}$ ) at B3LYP/6-31G\* level.

| <b>3C-1</b> |         |         | <b>3C-2</b> |   |         | <b>3C-3</b> |         |   |         |         |         |
|-------------|---------|---------|-------------|---|---------|-------------|---------|---|---------|---------|---------|
| C           | -1.9964 | -3.0905 | 0.7479      | C | -1.7111 | -3.3464     | 0.698   | C | -2.0085 | -2.4478 | -0.8282 |
| C           | -0.5082 | -2.6871 | 0.824       | C | -0.2706 | -2.8019     | 0.8194  | C | -0.6992 | -2.3367 | -0.0313 |
| C           | -0.317  | -1.8661 | -0.4713     | C | -0.1306 | -1.9454     | -0.4585 | C | -0.1619 | -0.9373 | -0.4495 |
| C           | -1.6081 | -1.0329 | -0.5394     | C | -1.4921 | -1.2345     | -0.5368 | C | -1.4498 | -0.1143 | -0.7592 |
| C           | -2.7074 | -1.9878 | -0.07       | C | -2.5063 | -2.2991     | -0.1146 | C | -2.6315 | -1.072  | -0.6017 |
| C           | 1.0032  | -1.0293 | -0.579      | C | 1.1075  | -0.9898     | -0.5287 | C | 0.8176  | -0.2622 | 0.561   |
| C           | -1.1002 | 1.0511  | -1.6378     | C | -1.1714 | 0.8898      | -1.621  | C | -0.4146 | 1.7796  | -1.7553 |
| C           | -1.7659 | -0.3206 | -1.8897     | C | -1.7069 | -0.5343     | -1.8839 | C | -1.3476 | 0.6143  | -2.1082 |
| C           | -2.6632 | -3.3464 | 2.0927      | C | -2.379  | -3.6939     | 2.0215  | C | -2.9426 | -3.5749 | -0.4177 |
| C           | 1.594   | -1.0594 | -1.9971     | C | 1.7339  | -0.964      | -1.9303 | C | 2.1847  | -0.9413 | 0.5173  |
| C           | 2.1818  | -0.0778 | -2.7071     | C | 2.2238  | 0.0721      | -2.6366 | C | 3.1814  | -0.581  | -0.3096 |
| C           | 2.5623  | 1.352   | -2.4706     | C | 2.4326  | 1.5379      | -2.4069 | C | 3.092   | 0.5068  | -1.3201 |
| C           | 2.2797  | 2.1346  | -1.1817     | C | 2.0777  | 2.2847      | -1.1139 | C | 3.0227  | 1.9354  | -0.7559 |
| C           | 0.8156  | 0.3637  | 0.0964      | C | 0.7767  | 0.3772      | 0.1433  | C | 0.7679  | 1.325   | 0.56    |
| C           | -0.5863 | 0.9759  | -0.1913     | C | -0.6724 | 0.8544      | -0.1648 | C | -0.4684 | 1.86    | -0.22   |
| C           | 1.6462  | -2.4425 | -2.6384     | C | 1.9579  | -2.3373     | -2.5547 | C | 2.4215  | -2.0507 | 1.5135  |



|             |         |         |         |             |         |         |         |             |         |         |         |
|-------------|---------|---------|---------|-------------|---------|---------|---------|-------------|---------|---------|---------|
| C           | -2.0786 | 2.2228  | -1.7905 | C           | -2.2449 | 1.9753  | -1.7722 | C           | -0.782  | 3.1022  | -2.4255 |
| O           | -3.1492 | -0.1523 | -2.2535 | O           | -3.107  | -0.5434 | -2.2215 | O           | -2.6266 | 1.132   | -2.5266 |
| H           | -0.3749 | -2.6048 | -1.2783 | H           | -0.1048 | -2.6723 | -1.278  | H           | 0.3664  | -1.099  | -1.4002 |
| O           | -1.5226 | 0.0517  | 0.406   | O           | -1.5249 | -0.1579 | 0.4164  | O           | -1.5522 | 0.9782  | 0.1619  |
| C           | -3.6581 | -1.0572 | -3.1317 | C           | -3.4034 | -0.5209 | -3.5489 | C           | -3.2422 | 0.478   | -3.5475 |
| C           | -5.0868 | -0.7262 | -3.435  | C           | -4.8889 | -0.5413 | -3.739  | C           | -4.539  | 1.1509  | -3.8765 |
| O           | -3.0548 | -2.0127 | -3.5984 | O           | -2.5901 | -0.4816 | -4.4604 | O           | -2.8167 | -0.5191 | -4.1125 |
| C           | 2.0489  | 1.3314  | 0.117   | C           | 1.9112  | 1.4587  | 0.1808  | C           | 2.1056  | 2.1698  | 0.4977  |
| C           | 3.3444  | 0.5587  | 0.4824  | C           | 3.2711  | 0.8136  | 0.5597  | C           | 2.9444  | 1.9019  | 1.7887  |
| C           | 1.8485  | 2.3583  | 1.2752  | C           | 1.6     | 2.457   | 1.3396  | C           | 1.7647  | 3.6866  | 0.5985  |
| O           | 1.1897  | 3.0648  | -1.3993 | O           | 0.9102  | 3.1154  | -1.3339 | O           | 2.5848  | 2.8044  | -1.8333 |
| H           | 0.7372  | 0.0946  | 1.1585  | H           | 0.7085  | 0.0985  | 1.2042  | H           | 0.4379  | 1.5191  | 1.5981  |
| C           | 1.5246  | 4.2338  | -2.0203 | C           | 1.1419  | 4.3097  | -1.954  | C           | 3.5331  | 3.2161  | -2.7186 |
| C           | 0.333   | 5.1331  | -2.1284 | C           | -0.1274 | 5.0932  | -2.0781 | C           | 2.9117  | 4.1085  | -3.7487 |
| O           | 2.633   | 4.5162  | -2.4536 | O           | 2.2244  | 4.6941  | -2.3738 | O           | 4.7148  | 2.9071  | -2.693  |
| H           | 1.7498  | -1.5753 | 0.0155  | H           | 1.8863  | -1.4652 | 0.085   | H           | 0.428   | -0.4945 | 1.563   |
| O           | -0.2726 | -1.9224 | 2.0107  | O           | -0.1392 | -2.034  | 2.0199  | O           | -0.9816 | -2.351  | 1.3797  |
| C           | 0.8371  | -2.2085 | 2.731   | C           | 0.9779  | -2.2174 | 2.7619  | C           | -0.8106 | -3.5224 | 2.0377  |
| C           | 1.2006  | 0.3659  | 6.1403  | C           | 1.0207  | 0.3508  | 6.1948  | C           | -1.6881 | -3.1249 | 6.2152  |
| C           | 0.1132  | 0.523   | 5.2816  | C           | -0.054  | 0.4168  | 5.3086  | C           | -1.8493 | -2.0214 | 5.3778  |
| C           | -0.0257 | -0.3091 | 4.1685  | C           | -0.0889 | -0.4152 | 4.1874  | C           | -1.57   | -2.1305 | 4.0135  |
| C           | 0.9275  | -1.3049 | 3.9103  | C           | 0.9563  | -1.3194 | 3.9487  | C           | -1.1263 | -3.3497 | 3.4814  |
| C           | 2.0179  | -1.4552 | 4.7777  | C           | 2.0332  | -1.3783 | 4.8434  | C           | -0.9679 | -4.4539 | 4.3297  |
| C           | 2.1526  | -0.6217 | 5.8897  | C           | 2.0637  | -0.5453 | 5.9635  | C           | -1.2482 | -4.3405 | 5.6928  |
| O           | 1.6697  | -3.06   | 2.465   | O           | 1.8937  | -2.9828 | 2.5081  | O           | -0.443  | -4.5767 | 1.5456  |
| H           | -2.0589 | -4.0175 | 0.1604  | H           | -1.6706 | -4.2618 | 0.091   | H           | -1.7682 | -2.5646 | -1.8937 |
| H           | 0.1139  | -3.5896 | 0.8016  | H           | 0.4369  | -3.6393 | 0.8013  | H           | 0.0144  | -3.1207 | -0.3086 |
| H           | -3.2105 | -2.4755 | -0.9101 | H           | -2.9397 | -2.8027 | -0.9868 | H           | -3.4557 | -0.8914 | -1.2946 |
| H           | -3.4686 | -1.4668 | 0.5215  | H           | -3.3266 | -1.866  | 0.4686  | H           | -3.0563 | -0.9902 | 0.4074  |
| H           | -0.2857 | 1.2143  | -2.3449 | H           | -0.365  | 1.1276  | -2.3156 | H           | 0.5867  | 1.5199  | -2.0853 |
| H           | -1.2316 | -0.8415 | -2.692  | H           | -1.1357 | -1.0447 | -2.6677 | H           | -0.9013 | -0.0064 | -2.8932 |
| H           | -2.7092 | -2.4384 | 2.703   | H           | -2.5255 | -2.8079 | 2.6481  | H           | -3.2922 | -3.4678 | 0.6139  |
| H           | -3.6892 | -3.7012 | 1.9491  | H           | -3.3627 | -4.1424 | 1.847   | H           | -3.8279 | -3.5874 | -1.0626 |
| H           | -2.1178 | -4.1107 | 2.6556  | H           | -1.7746 | -4.4142 | 2.5822  | H           | -2.4443 | -4.5445 | -0.5143 |
| H           | 2.5403  | -0.3686 | -3.7006 | H           | 2.6329  | -0.183  | -3.6205 | H           | 4.1352  | -1.1053 | -0.2651 |
| H           | 3.6545  | 1.3693  | -2.602  | H           | 3.5132  | 1.6851  | -2.5517 | H           | 3.9714  | 0.4336  | -1.9739 |
| H           | 2.1631  | 1.9161  | -3.3239 | H           | 1.9598  | 2.0483  | -3.2564 | H           | 2.2599  | 0.3023  | -2.0007 |
| H           | 3.1764  | 2.7447  | -0.9933 | H           | 2.9154  | 2.9713  | -0.9174 | H           | 4.039   | 2.2416  | -0.4699 |
| H           | -0.7046 | 1.926   | 0.3351  | H           | -0.8878 | 1.7853  | 0.3651  | H           | -0.74   | 2.86    | 0.1326  |
| H           | 0.6941  | -2.6821 | -3.122  | H           | 1.0553  | -2.6818 | -3.0687 | H           | 1.8581  | -2.9438 | 1.2371  |
| H           | 2.4285  | -2.5207 | -3.4022 | H           | 2.7716  | -2.3349 | -3.2892 | H           | 3.4779  | -2.3364 | 1.5675  |
| H           | 1.8748  | -3.2075 | -1.8883 | H           | 2.2398  | -3.0686 | -1.7893 | H           | 2.1235  | -1.7372 | 2.5192  |
| H           | -1.5948 | 3.1683  | -1.5363 | H           | -1.858  | 2.9499  | -1.4659 | H           | -0.0384 | 3.8723  | -2.2008 |
| H           | -2.9452 | 2.1182  | -1.1282 | H           | -3.1228 | 1.77    | -1.1498 | H           | -1.7533 | 3.4765  | -2.0851 |
| H           | -2.4367 | 2.2995  | -2.8224 | H           | -2.5687 | 2.0651  | -2.8136 | H           | -0.8188 | 2.9867  | -3.5138 |
| H           | -5.154  | 0.2834  | -3.8485 | H           | -5.3314 | 0.3521  | -3.2915 | H           | -4.3561 | 2.191   | -4.1579 |
| H           | -5.4724 | -1.4307 | -4.1775 | H           | -5.1174 | -0.5468 | -4.8086 | H           | -5.0081 | 0.6401  | -4.7222 |
| H           | -5.6869 | -0.8109 | -2.5257 | H           | -5.3077 | -1.4453 | -3.2898 | H           | -5.2121 | 1.0968  | -3.0172 |
| H           | 3.2158  | -0.004  | 1.4143  | H           | 3.186   | 0.2356  | 1.4874  | H           | 2.3483  | 2.0847  | 2.6907  |
| H           | 4.1839  | 1.2481  | 0.6326  | H           | 4.0373  | 1.5807  | 0.7245  | H           | 3.8093  | 2.5752  | 1.8374  |
| H           | 3.6544  | -0.1478 | -0.2912 | H           | 3.6591  | 0.1455  | -0.2126 | H           | 3.3394  | 0.8901  | 1.865   |
| H           | 0.976   | 3.0004  | 1.1262  | H           | 0.6702  | 3.0111  | 1.184   | H           | 1.1781  | 4.0462  | -0.2499 |
| H           | 1.7249  | 1.8505  | 2.2387  | H           | 1.5173  | 1.9359  | 2.3004  | H           | 1.1909  | 3.9024  | 1.5075  |
| H           | 2.7185  | 3.0196  | 1.3677  | H           | 2.4002  | 3.1999  | 1.4424  | H           | 2.678   | 4.2927  | 0.6351  |
| H           | -0.1773 | 5.1963  | -1.1638 | H           | -0.6479 | 5.1174  | -1.1172 | H           | 2.469   | 4.982   | -3.2636 |
| H           | 0.6641  | 6.1398  | -2.3995 | H           | 0.1106  | 6.1237  | -2.3575 | H           | 3.6826  | 4.4504  | -4.445  |
| H           | -0.3423 | 4.7596  | -2.9012 | H           | -0.7597 | 4.6515  | -2.8513 | H           | 2.1545  | 3.5547  | -4.3094 |
| H           | 1.3064  | 1.0146  | 7.0066  | H           | 1.0455  | 0.9994  | 7.0673  | H           | -1.9068 | -3.0376 | 7.2768  |
| H           | -0.6278 | 1.2943  | 5.4771  | H           | -0.8659 | 1.1172  | 5.4888  | H           | -2.1941 | -1.0746 | 5.7866  |
| H           | -0.8782 | -0.1654 | 3.5073  | H           | -0.9333 | -0.3427 | 3.5046  | H           | -1.7049 | -1.2574 | 3.379   |
| H           | 2.7673  | -2.2217 | 4.5892  | H           | 2.8532  | -2.0726 | 4.6701  | H           | -0.6255 | -5.4073 | 3.9313  |
| H           | 3.0003  | -0.7433 | 6.5595  | H           | 2.9016  | -0.5956 | 6.6546  | H           | -1.1237 | -5.2008 | 6.3459  |
| <b>3C-4</b> |         |         |         | <b>3C-5</b> |         |         |         | <b>3C-6</b> |         |         |         |
| C           | -2.1495 | -2.3797 | -0.8553 | C           | -2.2111 | -3.1212 | 0.0277  | C           | -2.2235 | -3.1822 | -0.12   |
| C           | -0.8199 | -2.3527 | -0.0866 | C           | -0.7727 | -2.64   | 0.3156  | C           | -0.8039 | -2.7066 | 0.2595  |
| C           | -0.231  | -0.9658 | -0.4727 | C           | -0.5112 | -1.6629 | -0.8521 | C           | -0.4814 | -1.708  | -0.8733 |

|   |         |         |         |   |         |         |         |   |         |         |         |
|---|---------|---------|---------|---|---------|---------|---------|---|---------|---------|---------|
| C | -1.4884 | -0.0734 | -0.6962 | C | -1.8468 | -0.9002 | -0.9669 | C | -1.8079 | -0.9377 | -1.0335 |
| C | -2.7107 | -0.9868 | -0.573  | C | -2.9186 | -1.9641 | -0.7146 | C | -2.8959 | -2.0004 | -0.8553 |
| C | 0.8158  | -0.383  | 0.528   | C | 0.768   | -0.757  | -0.7357 | C | 0.7946  | -0.8115 | -0.6808 |
| C | -0.4118 | 1.8243  | -1.6371 | C | -1.3218 | 1.3058  | -1.7933 | C | -1.238  | 1.2631  | -1.8306 |
| C | -1.4104 | 0.7227  | -2.0074 | C | -1.9587 | -0.0334 | -2.2296 | C | -1.8716 | -0.0668 | -2.2945 |
| C | -3.1218 | -3.4803 | -0.4615 | C | -2.987  | -3.5973 | 1.2482  | C | -3.0579 | -3.7024 | 1.0424  |
| C | 2.148   | -1.1175 | 0.3966  | C | 1.4369  | -0.6084 | -2.1255 | C | 1.5359  | -0.6559 | -2.032  |
| C | 3.1274  | -0.7592 | -0.4516 | C | 1.9939  | 0.493   | -2.6656 | C | 2.1172  | 0.4494  | -2.5374 |
| C | 3.0482  | 0.3815  | -1.4033 | C | 2.2971  | 1.8026  | -2.0167 | C | 2.3819  | 1.7568  | -1.8671 |
| C | 3.0625  | 1.7822  | -0.7685 | C | 2.7435  | 1.6238  | -0.5696 | C | 2.7645  | 1.5677  | -0.4032 |
| C | 0.8359  | 1.2022  | 0.6062  | C | 0.4084  | 0.5448  | 0.0774  | C | 0.4007  | 0.4853  | 0.1227  |
| C | -0.4052 | 1.8261  | -0.0968 | C | -0.9944 | 1.1077  | -0.3085 | C | -0.9779 | 1.0587  | -0.3302 |
| C | 2.3723  | -2.2835 | 1.3292  | C | 1.5888  | -1.8824 | -2.9427 | C | 1.735   | -1.9259 | -2.8446 |
| C | -0.7339 | 3.2     | -2.2163 | C | -2.2249 | 2.5264  | -1.9924 | C | -2.1119 | 2.4999  | -2.0563 |
| O | -2.7042 | 1.282   | -2.3134 | O | -3.3355 | 0.178   | -2.6009 | O | -3.2481 | 0.1075  | -2.685  |
| H | 0.2528  | -1.1111 | -1.4492 | H | -0.4492 | -2.3091 | -1.7337 | H | -0.3802 | -2.3367 | -1.7639 |
| O | -1.5113 | 0.9696  | 0.2841  | O | -1.9255 | 0.0748  | 0.0872  | O | -1.9303 | 0.0283  | 0.0214  |
| C | -3.0453 | 1.3427  | -3.628  | C | -3.8135 | -0.5843 | -3.62   | C | -3.4859 | 0.2302  | -4.0182 |
| C | -4.4168 | 1.9268  | -3.7721 | C | -5.24   | -0.2245 | -3.9004 | C | -4.9545 | 0.398   | -4.2596 |
| O | -2.344  | 0.9853  | -4.5631 | O | -3.1877 | -1.4483 | -4.217  | O | -2.6381 | 0.2147  | -4.8984 |
| C | 2.2068  | 1.9907  | 0.5322  | C | 1.5594  | 1.5775  | 0.4357  | C | 1.5372  | 1.5082  | 0.5482  |
| C | 3.0824  | 1.6207  | 1.7725  | C | 2.1821  | 1.1354  | 1.7985  | C | 2.0983  | 1.0424  | 1.9296  |
| C | 1.9389  | 3.5133  | 0.7237  | C | 1.0016  | 3.0017  | 0.685   | C | 0.9717  | 2.9296  | 0.7956  |
| O | 2.6186  | 2.7207  | -1.7831 | O | 3.6219  | 2.724   | -0.213  | O | 3.6225  | 2.6673  | 0.0014  |
| H | 0.5542  | 1.3579  | 1.6648  | H | 0.1826  | 0.1354  | 1.0703  | H | 0.1227  | 0.0684  | 1.0996  |
| C | 3.5444  | 3.1315  | -2.6923 | C | 4.9306  | 2.6035  | -0.5669 | C | 4.9464  | 2.5526  | -0.2933 |
| C | 2.9176  | 4.0915  | -3.6561 | C | 5.6975  | 3.7985  | -0.09   | C | 5.6866  | 3.7479  | 0.2235  |
| O | 4.7121  | 2.7742  | -2.7317 | O | 5.4202  | 1.6719  | -1.1879 | O | 5.4671  | 1.6254  | -0.8951 |
| H | 0.4566  | -0.6481 | 1.5331  | H | 1.5085  | -1.3114 | -0.1418 | H | 1.4999  | -1.3752 | -0.0537 |
| O | -1.0717 | -2.4012 | 1.329   | O | -0.7229 | -2.0105 | 1.5992  | O | -0.8281 | -2.0975 | 1.5535  |
| C | -0.9319 | -3.5988 | 1.9459  | C | 0.3054  | -2.3361 | 2.4165  | C | 0.1605  | -2.4258 | 2.4175  |
| C | -1.6843 | -3.2992 | 6.1557  | C | 0.0461  | -0.2674 | 6.1628  | C | -0.2954 | -0.3978 | 6.1671  |
| C | -1.8178 | -2.1632 | 5.3579  | C | -0.9344 | -0.0493 | 5.1954  | C | -1.2211 | -0.1651 | 5.1504  |
| C | -1.5784 | -2.24   | 3.9838  | C | -0.8702 | -0.7171 | 3.9705  | C | -1.0926 | -0.8197 | 3.9233  |
| C | -1.2027 | -3.4594 | 3.4022  | C | 0.1801  | -1.609  | 3.7091  | C | -0.0327 | -1.7129 | 3.7096  |
| C | -1.0716 | -4.5965 | 4.211   | C | 1.1618  | -1.8217 | 4.6863  | C | 0.8939  | -1.94   | 4.736   |
| C | -1.3119 | -4.5152 | 5.584   | C | 1.0935  | -1.1523 | 5.9096  | C | 0.7614  | -1.2838 | 5.9613  |
| O | -0.6217 | -4.6507 | 1.4111  | O | 1.222   | -3.0973 | 2.1539  | O | 1.0932  | -3.1796 | 2.1924  |
| H | -1.9369 | -2.4707 | -1.9293 | H | -2.1442 | -3.9625 | -0.6766 | H | -2.117  | -3.9975 | -0.8494 |
| H | -0.1491 | -3.1577 | -0.4067 | H | -0.087  | -3.4938 | 0.2616  | H | -0.1151 | -3.559  | 0.2296  |
| H | -3.5184 | -0.7468 | -1.2707 | H | -3.3159 | -2.3685 | -1.6506 | H | -3.2589 | -2.3632 | -1.8243 |
| H | -3.1362 | -0.9238 | 0.4367  | H | -3.7582 | -1.5617 | -0.137  | H | -3.7538 | -1.6087 | -0.2974 |
| H | 0.5624  | 1.5346  | -2.0187 | H | -0.4235 | 1.5     | -2.3738 | H | -0.3131 | 1.4447  | -2.3715 |
| H | -1.0505 | 0.0949  | -2.8303 | H | -1.3975 | -0.4571 | -3.0697 | H | -1.3011 | -0.533  | -3.1055 |
| H | -3.4435 | -3.3945 | 0.5812  | H | -3.1625 | -2.785  | 1.9613  | H | -3.2714 | -2.9164 | 1.7742  |
| H | -4.0208 | -3.4336 | -1.0854 | H | -3.9638 | -3.9925 | 0.9497  | H | -4.0172 | -4.0884 | 0.6816  |
| H | -2.6673 | -4.466  | -0.6021 | H | -2.4438 | -4.3953 | 1.7646  | H | -2.5383 | -4.5173 | 1.5568  |
| H | 4.0582  | -1.3248 | -0.4708 | H | 2.4053  | 0.4212  | -3.6746 | H | 2.58    | 0.3841  | -3.5244 |
| H | 3.8986  | 0.3043  | -2.094  | H | 3.1153  | 2.2604  | -2.5883 | H | 3.2217  | 2.2243  | -2.398  |
| H | 2.1831  | 0.2462  | -2.0597 | H | 1.4685  | 2.5076  | -2.1209 | H | 1.5539  | 2.4573  | -2.0018 |
| H | 4.1014  | 2.0327  | -0.5113 | H | 3.319   | 0.6928  | -0.4646 | H | 3.338   | 0.6375  | -0.2808 |
| H | -0.6209 | 2.8164  | 0.3165  | H | -1.2555 | 1.9801  | 0.2931  | H | -1.2632 | 1.9301  | 0.2617  |
| H | 1.7496  | -3.1329 | 1.0422  | H | 0.6776  | -2.0949 | -3.5102 | H | 0.8588  | -2.1349 | -3.4659 |
| H | 3.4133  | -2.625  | 1.318   | H | 2.4122  | -1.8156 | -3.6635 | H | 2.5998  | -1.8564 | -3.5147 |
| H | 2.1387  | -2.0026 | 2.3613  | H | 1.8196  | -2.732  | -2.2911 | H | 1.9257  | -2.779  | -2.1845 |
| H | 0.0386  | 3.9264  | -1.949  | H | -1.7057 | 3.439   | -1.6798 | H | -1.6049 | 3.397   | -1.6843 |
| H | -1.6885 | 3.5867  | -1.8442 | H | -3.1462 | 2.4521  | -1.4046 | H | -3.0718 | 2.4219  | -1.5347 |
| H | -0.7779 | 3.1604  | -3.3093 | H | -2.4938 | 2.6444  | -3.0474 | H | -2.3054 | 2.6545  | -3.1223 |
| H | -5.1417 | 1.3068  | -3.2386 | H | -5.3115 | 0.8354  | -4.1578 | H | -5.3064 | 1.3136  | -3.7778 |
| H | -4.426  | 2.9491  | -3.386  | H | -5.602  | -0.8122 | -4.7488 | H | -5.1386 | 0.4755  | -5.335  |
| H | -4.6917 | 1.9499  | -4.8305 | H | -5.857  | -0.4516 | -3.0276 | H | -5.4949 | -0.4713 | -3.8765 |
| H | 2.5302  | 1.7806  | 2.7062  | H | 1.437   | 1.1574  | 2.6019  | H | 1.319   | 1.055   | 2.7001  |
| H | 3.9771  | 2.2538  | 1.8198  | H | 3.0007  | 1.7959  | 2.106   | H | 2.905   | 1.6948  | 2.2824  |
| H | 3.4356  | 0.5907  | 1.7815  | H | 2.5812  | 0.1166  | 1.7381  | H | 2.4961  | 0.0231  | 1.8709  |
| H | 1.3365  | 3.942   | -0.0799 | H | 0.5609  | 3.4296  | -0.2204 | H | 0.5785  | 3.3755  | -0.123  |
| H | 1.4114  | 3.7055  | 1.6654  | H | 0.2392  | 2.997   | 1.4723  | H | 0.1707  | 2.9131  | 1.5435  |

|             |         |         |             |   |         |             |         |   |         |         |         |
|-------------|---------|---------|-------------|---|---------|-------------|---------|---|---------|---------|---------|
| H           | 2.8793  | 4.0768  | 0.753       | H | 1.7788  | 3.6948      | 1.0264  | H | 1.7327  | 3.6134  | 1.1883  |
| H           | 2.5315  | 4.9597  | -3.1161     | H | 5.3137  | 4.7011      | -0.5718 | H | 5.3207  | 4.6518  | -0.2698 |
| H           | 3.6722  | 4.4332  | -4.3702     | H | 5.6196  | 3.8791      | 0.9972  | H | 5.5605  | 3.8221  | 1.3066  |
| H           | 2.1158  | 3.5926  | -4.2062     | H | 6.7523  | 3.6817      | -0.3547 | H | 6.7524  | 3.6367  | 0.0047  |
| H           | -1.8718 | -3.2369 | 7.225       | H | -0.0063 | 0.2533      | 7.1159  | H | -0.3977 | 0.1128  | 7.1217  |
| H           | -2.1097 | -1.216  | 5.8052      | H | -1.7501 | 0.642       | 5.3934  | H | -2.0438 | 0.5273  | 5.3113  |
| H           | -1.6904 | -1.3416 | 3.3809      | H | -1.642  | -0.5278     | 3.227   | H | -1.8219 | -0.6187 | 3.1409  |
| H           | -0.7817 | -5.5503 | 3.7741      | H | 1.9844  | -2.509      | 4.4971  | H | 1.7235  | -2.628  | 4.5841  |
| H           | -1.2088 | -5.4007 | 6.2064      | H | 1.8578  | -1.3218     | 6.6642  | H | 1.4831  | -1.4643 | 6.7542  |
| <b>3C-7</b> |         |         | <b>3C-8</b> |   |         | <b>3C-9</b> |         |   |         |         |         |
| C           | -2.9197 | -1.5484 | 0.9297      | C | -2.8034 | -1.8361     | 0.0215  | C | -3.0075 | -1.1692 | 1.0801  |
| C           | -1.5026 | -2.0761 | 0.6292      | C | -1.3096 | -2.193      | 0.1398  | C | -1.6884 | -1.8861 | 0.7403  |
| C           | -0.7877 | -0.9877 | -0.2397     | C | -0.508  | -1.0002     | -0.487  | C | -0.8968 | -0.9416 | -0.2274 |
| C           | -1.8531 | 0.1018  | -0.4699     | C | -1.5863 | -0.0688     | -1.081  | C | -1.8985 | 0.1849  | -0.5737 |
| C           | -3.1909 | -0.5876 | -0.2279     | C | -2.8416 | -0.9261     | -1.2048 | C | -3.2739 | -0.3357 | -0.1713 |
| C           | 0.5962  | -0.4796 | 0.2644      | C | 0.5549  | -0.3171     | 0.4266  | C | 0.5308  | -0.4954 | 0.2345  |
| C           | -0.9009 | 2.0737  | -1.4903     | C | -0.5543 | 1.9825      | -1.8308 | C | -0.6122 | 1.667   | -1.9357 |
| C           | -1.6923 | 0.8035  | -1.8332     | C | -1.1174 | 0.6538      | -2.358  | C | -1.7843 | 0.68    | -2.0192 |
| C           | -3.0745 | -0.8919 | 2.303       | C | -3.402  | -1.1916     | 1.2732  | C | -2.9549 | -0.3347 | 2.3614  |
| C           | 1.7019  | -1.3023 | -0.402      | C | 1.9194  | -0.9764     | 0.196   | C | 1.5821  | -1.4294 | -0.3767 |
| C           | 2.4263  | -0.9055 | -1.4613     | C | 2.9107  | -0.4709     | -0.5564 | C | 2.4889  | -1.1393 | -1.3251 |
| C           | 2.2377  | 0.3749  | -2.1918     | C | 2.8342  | 0.7849      | -1.3451 | C | 2.7075  | 0.1299  | -2.0685 |
| C           | 2.6681  | 1.6341  | -1.4287     | C | 2.7805  | 2.0828      | -0.5276 | C | 2.8963  | 1.449   | -1.3019 |
| C           | 0.7482  | 1.0955  | 0.3607      | C | 0.4571  | 1.2615      | 0.5171  | C | 0.7645  | 1.0622  | 0.2409  |
| C           | -0.5318 | 1.8877  | -0.02       | C | -0.6994 | 1.8773      | -0.3152 | C | -0.3783 | 1.8632  | -0.4321 |
| C           | 1.9889  | -2.6502 | 0.2186      | C | 2.1494  | -2.2906     | 0.9073  | C | 1.6035  | -2.8323 | 0.2022  |
| C           | -1.692  | 3.377   | -1.6643     | C | -1.2792 | 3.2266      | -2.3568 | C | -0.8533 | 3.0068  | -2.6318 |
| O           | -2.977  | 1.0927  | -2.4126     | O | -2.2072 | 0.9057      | -3.2659 | O | -3.0127 | 1.3374  | -2.3916 |
| H           | -0.6366 | -1.4826 | -1.2116     | H | 0.0179  | -1.4498     | -1.3434 | H | -0.7778 | -1.5366 | -1.1461 |
| O           | -1.6456 | 1.1373  | 0.4978      | O | -1.825  | 0.9964      | -0.1506 | O | -1.5802 | 1.3551  | 0.1849  |
| C           | -2.9972 | 1.2335  | -3.7663     | C | -2.3438 | 0.0385      | -4.3044 | C | -3.3799 | 1.2395  | -3.6971 |
| C           | -4.3947 | 1.5042  | -4.2313     | C | -3.505  | 0.4431      | -5.159  | C | -4.6782 | 1.9532  | -3.9163 |
| O           | -2.0228 | 1.164   | -4.5014     | O | -1.6371 | -0.9369     | -4.5121 | O | -2.7489 | 0.6663  | -4.573  |
| C           | 2.1475  | 1.7693  | 0.0477      | C | 1.779   | 2.1169      | 0.6814  | C | 2.2351  | 1.6068  | 0.1028  |
| C           | 3.2249  | 1.175   | 1.0081      | C | 2.5333  | 1.6511      | 1.9659  | C | 3.1467  | 0.9351  | 1.1742  |
| C           | 2.092   | 3.2777  | 0.4327      | C | 1.401   | 3.5976      | 0.9859  | C | 2.2556  | 3.1194  | 0.4864  |
| O           | 2.222   | 2.7781  | -2.2024     | O | 2.4547  | 3.1578      | -1.448  | O | 2.4281  | 2.5174  | -2.1688 |
| H           | 0.698   | 1.2191  | 1.4601      | H | 0.0123  | 1.3651      | 1.526   | H | 0.5494  | 1.2897  | 1.3033  |
| C           | 3.009   | 3.1681  | -3.242      | C | 3.4809  | 3.692       | -2.1647 | C | 3.286   | 2.9339  | -3.1419 |
| C           | 2.3901  | 4.3447  | -3.932      | C | 2.9658  | 4.7879      | -3.0463 | C | 2.6598  | 4.0344  | -3.9416 |
| O           | 4.0622  | 2.6453  | -3.5744     | O | 4.6489  | 3.3381      | -2.1107 | O | 4.3997  | 2.4767  | -3.3524 |
| H           | 0.6785  | -0.7629 | 1.3226      | H | 0.3161  | -0.5988     | 1.4615  | H | 0.6091  | -0.7227 | 1.3069  |
| O           | -0.7903 | -2.4252 | 1.8188      | O | -0.9378 | -2.5012     | 1.4861  | O | -0.9616 | -2.26   | 1.9131  |
| C           | -1.0674 | -3.6444 | 2.3453      | C | -1.2312 | -3.7543     | 1.9155  | C | -1.3714 | -3.395  | 2.5333  |
| C           | 1.2141  | -4.4007 | 5.8952      | C | -0.0419 | -4.3582     | 5.9896  | C | 0.9459  | -4.2188 | 6.0448  |
| C           | 1.2745  | -3.1395 | 5.3031      | C | 0.0266  | -3.0769     | 5.4433  | C | 1.1374  | -3.0133 | 5.3703  |
| C           | 0.5377  | -2.8726 | 4.1468      | C | -0.3572 | -2.8592     | 4.1179  | C | 0.3917  | -2.7256 | 4.2247  |
| C           | -0.2631 | -3.8719 | 3.576       | C | -0.8097 | -3.928      | 3.3316  | C | -0.5497 | -3.6483 | 3.7475  |
| C           | -0.3211 | -5.1354 | 4.1797      | C | -0.8801 | -5.2115     | 3.8898  | C | -0.7389 | -4.8556 | 4.4337  |
| C           | 0.4168  | -5.3981 | 5.3355      | C | -0.4957 | -5.425      | 5.215   | C | 0.0083  | -5.1393 | 5.5786  |
| O           | -1.851  | -4.461  | 1.8885      | O | -1.7552 | -4.6356     | 1.2536  | O | -2.2752 | -4.127  | 2.1635  |
| H           | -3.6398 | -2.3751 | 0.8881      | H | -3.3878 | -2.742      | -0.1819 | H | -3.8121 | -1.9038 | 1.2073  |
| H           | -1.5877 | -2.9663 | -0.0113     | H | -1.1037 | -3.0654     | -0.4978 | H | -1.9212 | -2.7902 | 0.1584  |
| H           | -3.4877 | -1.1676 | -1.1107     | H | -2.7968 | -1.5544     | -2.1013 | H | -3.68   | -0.9846 | -0.9574 |
| H           | -3.9927 | 0.119   | 0.0109      | H | -3.7597 | -0.3305     | -1.24   | H | -3.993  | 0.4667  | 0.0242  |
| H           | -0.0269 | 2.1593  | -2.1282     | H | 0.4812  | 2.0922      | -2.1326 | H | 0.258   | 1.2137  | -2.3979 |
| H           | -1.131  | 0.157   | -2.5173     | H | -0.3209 | 0.1021      | -2.8706 | H | -1.5744 | -0.1518 | -2.7011 |
| H           | -2.2851 | -0.1651 | 2.5129      | H | -2.7797 | -0.3851     | 1.6702  | H | -2.0734 | 0.311   | 2.406   |
| H           | -4.0398 | -0.3809 | 2.3817      | H | -4.3968 | -0.7855     | 1.0624  | H | -3.8461 | 0.2952  | 2.4505  |
| H           | -3.0421 | -1.6466 | 3.0958      | H | -3.517  | -1.9347     | 2.0695  | H | -2.9268 | -0.9849 | 3.2422  |
| H           | 3.204   | -1.5579 | -1.857      | H | 3.8503  | -1.016      | -0.6428 | H | 3.1635  | -1.9359 | -1.6452 |
| H           | 2.8062  | 0.3173  | -3.1295     | H | 3.7117  | 0.8242      | -2.0044 | H | 3.6227  | -0.0127 | -2.6625 |
| H           | 1.2016  | 0.4487  | -2.5323     | H | 2.0003  | 0.7114      | -2.0482 | H | 1.9377  | 0.2109  | -2.8424 |
| H           | 3.7661  | 1.6617  | -1.3914     | H | 3.7832  | 2.2797      | -0.123  | H | 3.9758  | 1.5958  | -1.1504 |
| H           | -0.5308 | 2.8441  | 0.5136      | H | -0.9925 | 2.8356      | 0.1259  | H | -0.3201 | 2.92    | -0.1589 |
| H           | 1.1348  | -3.3211 | 0.0917      | H | 1.4949  | -3.0668     | 0.5015  | H | 0.6773  | -3.3636 | -0.0334 |

|   |         |         |         |   |         |         |         |   |         |         |         |
|---|---------|---------|---------|---|---------|---------|---------|---|---------|---------|---------|
| H | 2.8571  | -3.1393 | -0.2363 | H | 3.1798  | -2.6466 | 0.7984  | H | 2.4283  | -3.4364 | -0.1916 |
| H | 2.2027  | -2.5424 | 1.2867  | H | 1.9595  | -2.1842 | 1.9798  | H | 1.73    | -2.7937 | 1.2885  |
| H | -1.0956 | 4.2332  | -1.3298 | H | -0.8298 | 4.1346  | -1.9398 | H | 0.004   | 3.6731  | -2.4962 |
| H | -2.621  | 3.3696  | -1.0841 | H | -2.3403 | 3.225   | -2.0846 | H | -1.7297 | 3.5249  | -2.2281 |
| H | -1.9401 | 3.5526  | -2.7153 | H | -1.1997 | 3.2933  | -3.4471 | H | -0.9957 | 2.8677  | -3.7079 |
| H | -4.7478 | 2.449   | -3.8107 | H | -3.3505 | 1.4561  | -5.5392 | H | -4.5573 | 3.0167  | -3.6961 |
| H | -4.4053 | 1.5801  | -5.3223 | H | -3.5833 | -0.2387 | -6.0106 | H | -4.9798 | 1.844   | -4.962  |
| H | -5.0501 | 0.6814  | -3.9346 | H | -4.429  | 0.3862  | -4.5783 | H | -5.454  | 1.5143  | -3.2838 |
| H | 2.9054  | 1.249   | 2.0543  | H | 2.9573  | 0.6499  | 1.8913  | H | 2.7089  | 1.0263  | 2.1752  |
| H | 4.1694  | 1.7265  | 0.9229  | H | 1.8696  | 1.6606  | 2.8385  | H | 4.1304  | 1.4194  | 1.2091  |
| H | 3.4603  | 0.1288  | 0.8133  | H | 3.369   | 2.3247  | 2.1927  | H | 3.3342  | -0.1237 | 0.9965  |
| H | 1.3729  | 3.8396  | -0.1713 | H | 0.8656  | 4.0744  | 0.1592  | H | 1.6729  | 3.7405  | -0.2    |
| H | 1.8091  | 3.4065  | 1.484   | H | 0.762   | 3.6671  | 1.874   | H | 1.8531  | 3.2767  | 1.4938  |
| H | 3.0702  | 3.7543  | 0.2958  | H | 2.297   | 4.1999  | 1.1785  | H | 3.2797  | 3.5117  | 0.4776  |
| H | 3.0236  | 4.6482  | -4.7703 | H | 3.795   | 5.2129  | -3.619  | H | 3.395   | 4.4338  | -4.646  |
| H | 1.4059  | 4.0704  | -4.3203 | H | 2.229   | 4.3847  | -3.7458 | H | 1.8081  | 3.6438  | -4.5036 |
| H | 2.3089  | 5.1822  | -3.2346 | H | 2.5233  | 5.5781  | -2.4345 | H | 2.3456  | 4.8441  | -3.2779 |
| H | 1.7877  | -4.606  | 6.796   | H | 0.2563  | -4.5253 | 7.0219  | H | 1.5268  | -4.4403 | 6.937   |
| H | 1.8942  | -2.3621 | 5.7435  | H | 0.377   | -2.2457 | 6.0505  | H | 1.8668  | -2.2954 | 5.7379  |
| H | 0.595   | -1.8808 | 3.7054  | H | -0.3022 | -1.8514 | 3.7142  | H | 0.5533  | -1.7774 | 3.7182  |
| H | -0.9417 | -5.9204 | 3.7511  | H | -1.2346 | -6.0504 | 3.2936  | H | -1.4696 | -5.5801 | 4.0787  |
| H | 0.368   | -6.3805 | 5.7989  | H | -0.5518 | -6.4233 | 5.6422  | H | -0.1426 | -6.0779 | 6.1063  |

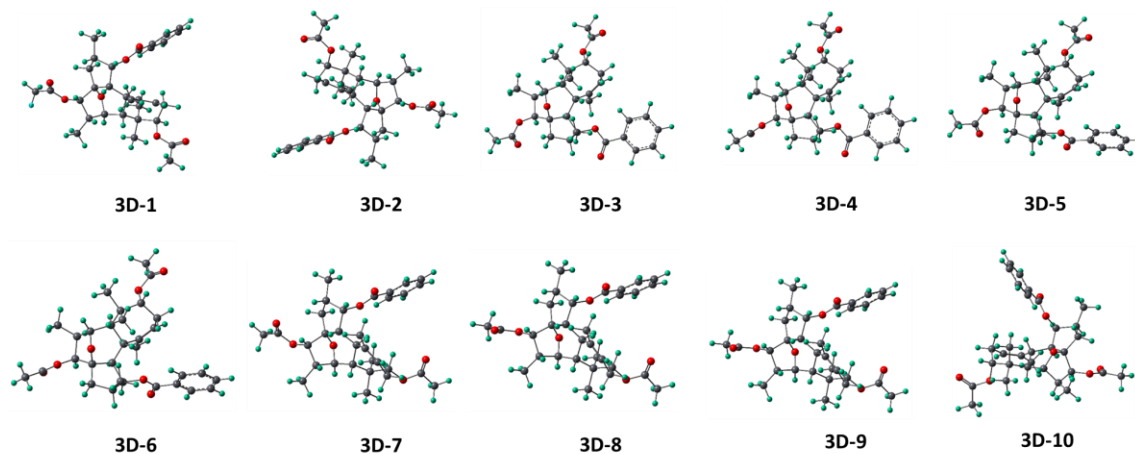

Figure S17. Key conformers of isomer 3D.

Table S17. Important thermodynamic parameters and Boltzmann distributions of the optimized isomer 3D at B3LYP/6-31G\* level in the gas phase.

| Conformations | Energy (a.u) | $\Delta G$ (kcal/mol) | %      | Number of imaginary frequencies |
|---------------|--------------|-----------------------|--------|---------------------------------|
| 3D-1          | -1731.987387 | 0                     | 44.36% | 0                               |
| 3D-2          | -1731.987309 | 0.048606375           | 40.86% | 0                               |
| 3D-3          | -1731.984    | 2.125396248           | 1.22%  | 0                               |
| 3D-4          | -1731.984134 | 2.040934357           | 1.41%  | 0                               |
| 3D-5          | -1731.983833 | 2.230164132           | 1.03%  | 0                               |
| 3D-6          | -1731.983745 | 2.285133386           | 0.94%  | 0                               |
| 3D-7          | -1731.984934 | 1.539214413           | 3.30%  | 0                               |
| 3D-8          | -1731.984848 | 1.592953762           | 3.01%  | 0                               |
| 3D-9          | -1731.984848 | 1.593035337           | 3.01%  | 0                               |
| 3D-10         | -1731.98367  | 2.332309054           | 0.86%  | 0                               |

Table S18. Optimized Z-matrixes of isomer 3D in the gas phase ( $\text{\AA}$ ) at B3LYP/6-31G\* level.

| 3D-1 |         |         | 3D-2  |  |         | 3D-3    |        |  |        |        |        |
|------|---------|---------|-------|--|---------|---------|--------|--|--------|--------|--------|
| C    |         |         | C     |  |         | C       |        |  |        |        |        |
|      | -3.4031 | -1.0165 | 0.286 |  | -2.9458 | -1.8667 | 0.8943 |  | -2.914 | 0.4566 | 1.2257 |

|   |         |         |         |   |         |         |         |   |         |         |         |
|---|---------|---------|---------|---|---------|---------|---------|---|---------|---------|---------|
| C | -1.9841 | -1.4681 | 0.6639  | C | -1.4476 | -1.7745 | 1.2191  | C | -2.0257 | -0.791  | 1.0899  |
| C | -1.1086 | -0.9351 | -0.5033 | C | -0.8143 | -1.3174 | -0.1225 | C | -1.2495 | -0.6265 | -0.2485 |
| C | -1.9123 | 0.2701  | -1.0773 | C | -1.9559 | -0.548  | -0.8482 | C | -2.0975 | 0.3962  | -1.0503 |
| C | -3.1727 | 0.4015  | -0.2283 | C | -3.1856 | -0.614  | 0.0544  | C | -3.3369 | 0.7148  | -0.2193 |
| C | 0.3616  | -0.5591 | -0.1396 | C | 0.4975  | -0.4798 | -0.0017 | C | 0.2601  | -0.2279 | -0.1079 |
| C | -0.6672 | 0.4173  | -3.0823 | C | -0.894  | -0.5052 | -2.9591 | C | -0.969  | 0.1333  | -3.1105 |
| C | -2.0951 | 0.1322  | -2.5983 | C | -2.1539 | -1.0576 | -2.285  | C | -2.3598 | -0.0374 | -2.4983 |
| C | -4.4103 | -1.0685 | 1.4244  | C | -3.8561 | -1.9368 | 2.1108  | C | -2.24   | 1.6643  | 1.8742  |
| C | 1.2517  | -1.7623 | 0.1576  | C | 1.7108  | -1.2936 | 0.4383  | C | 1.1764  | -1.3829 | 0.3058  |
| C | 2.3567  | -1.631  | 0.9118  | C | 2.7612  | -0.6979 | 1.0291  | C | 2.3718  | -1.1482 | 0.8753  |
| C | 2.9006  | -0.3226 | 1.4029  | C | 2.9215  | 0.7852  | 1.1843  | C | 2.976   | 0.2112  | 1.0657  |
| C | 3.2963  | 0.6346  | 0.2597  | C | 2.971   | 1.5327  | -0.1642 | C | 3.2411  | 0.9553  | -0.2574 |
| C | 1.0514  | 0.4289  | -1.1568 | C | 0.8235  | 0.407   | -1.2634 | C | 0.8615  | 0.53    | -1.3545 |
| C | -0.0437 | 1.2309  | -1.9213 | C | -0.4912 | 0.6853  | -2.051  | C | -0.2901 | 1.1677  | -2.1804 |
| C | 0.9209  | -3.1075 | -0.4318 | C | 1.7608  | -2.7746 | 0.1726  | C | 0.7533  | -2.8048 | 0.0464  |
| C | -0.5718 | 1.1467  | -4.4181 | C | -1.0564 | -0.0843 | -4.4153 | C | -0.9537 | 0.5677  | -4.572  |
| O | -2.9897 | 1.1346  | -3.1169 | O | -3.3426 | -0.4677 | -2.8465 | O | -3.2853 | 0.8624  | -3.1403 |
| H | -1.1135 | -1.7243 | -1.2661 | H | -0.6228 | -2.2337 | -0.6956 | H | -1.3212 | -1.5914 | -0.7647 |
| O | -1.1145 | 1.4575  | -0.9833 | O | -1.5413 | 0.8049  | -1.0688 | O | -1.2993 | 1.5757  | -1.2364 |
| C | -4.2497 | 0.721   | -3.4166 | C | -4.068  | -1.249  | -3.6896 | C | -4.5613 | 0.4196  | -3.2889 |
| C | -5.0478 | 1.8653  | -3.9608 | C | -5.2678 | -0.4965 | -4.1766 | C | -5.3922 | 1.4706  | -3.958  |
| O | -4.6818 | -0.4116 | -3.258  | O | -3.791  | -2.3943 | -4.0147 | O | -4.9819 | -0.6705 | -2.9298 |
| C | 2.1281  | 1.3938  | -0.4712 | C | 1.6015  | 1.7583  | -0.905  | C | 1.9949  | 1.5907  | -0.9764 |
| C | 1.4798  | 2.3877  | 0.5234  | C | 0.736   | 2.7323  | -0.0685 | C | 1.4497  | 2.7503  | -0.1099 |
| C | 2.8083  | 2.2581  | -1.5785 | C | 1.9511  | 2.5053  | -2.23   | C | 2.5446  | 2.2396  | -2.2852 |
| O | 4.0689  | -0.0844 | -0.7382 | O | 3.8745  | 0.8488  | -1.0725 | O | 3.907   | 0.0672  | -1.194  |
| H | 1.6094  | -0.1601 | -1.8987 | H | 1.4957  | -0.1557 | -1.9269 | H | 1.3599  | -0.2038 | -2.0046 |
| C | 5.3781  | -0.3123 | -0.4514 | C | 5.2047  | 1.059   | -0.8865 | C | 5.2393  | -0.1303 | -1.009  |
| C | 6.0142  | -1.0853 | -1.5654 | C | 5.9885  | 0.2617  | -1.8832 | C | 5.7603  | -1.08   | -2.0433 |
| O | 5.9635  | 0.0529  | 0.5576  | O | 5.7024  | 1.7866  | -0.0398 | O | 5.9231  | 0.3821  | -0.1348 |
| H | 0.2759  | -0.0032 | 0.7982  | H | 0.296   | 0.2268  | 0.808   | H | 0.2716  | 0.4795  | 0.7271  |
| O | -1.5993 | -0.8537 | 1.9032  | O | -1.2387 | -0.7849 | 2.2379  | O | -1.1705 | -0.9817 | 2.2171  |
| C | -1.1093 | -1.6683 | 2.8692  | C | -0.5225 | -1.1613 | 3.3252  | C | -1.7323 | -1.5806 | 3.2962  |
| C | 0.4185  | 0.5781  | 6.1865  | C | 0.3338  | 2.1801  | 5.8718  | C | 1.0548  | -1.9969 | 6.5274  |
| C | 0.5012  | -0.8137 | 6.1706  | C | 0.8113  | 0.9075  | 6.1823  | C | -0.2173 | -2.5622 | 6.6077  |
| C | -0.0059 | -1.5308 | 5.0853  | C | 0.5194  | -0.1712 | 5.3454  | C | -1.1138 | -2.4174 | 5.547   |
| C | -0.5998 | -0.8581 | 4.009   | C | -0.2537 | 0.0182  | 4.192   | C | -0.7408 | -1.7066 | 4.3981  |
| C | -0.6795 | 0.5419  | 4.0322  | C | -0.7307 | 1.301   | 3.8863  | C | 0.5377  | -1.1373 | 4.3272  |
| C | -0.1706 | 1.2557  | 5.1196  | C | -0.4359 | 2.3777  | 4.7259  | C | 1.4325  | -1.2848 | 5.3895  |
| O | -1.0606 | -2.887  | 2.8308  | O | -0.127  | -2.2885 | 3.5745  | O | -2.8839 | -1.9774 | 3.3762  |
| H | -3.7685 | -1.6419 | -0.5397 | H | -3.1203 | -2.7533 | 0.2696  | H | -3.7958 | 0.2194  | 1.8334  |
| H | -1.9468 | -2.561  | 0.7175  | H | -1.0709 | -2.7584 | 1.5166  | H | -2.6725 | -1.6724 | 0.966   |
| H | -4.0411 | 0.7797  | -0.7717 | H | -4.1298 | -0.6827 | -0.4944 | H | -4.1491 | 0.021   | -0.4643 |
| H | -3.0009 | 1.0989  | 0.6022  | H | -3.2475 | 0.2825  | 0.6845  | H | -3.6973 | 1.7383  | -0.365  |
| H | -0.1325 | -0.5341 | -3.1989 | H | -0.1109 | -1.2738 | -2.9344 | H | -0.4385 | -0.8261 | -3.056  |
| H | -2.4094 | -0.8715 | -2.9062 | H | -2.1995 | -2.1519 | -2.3181 | H | -2.6941 | -1.0776 | -2.581  |
| H | -4.4925 | -2.0864 | 1.819   | H | -3.6072 | -2.8062 | 2.7278  | H | -1.9629 | 1.4478  | 2.9108  |
| H | -4.1331 | -0.4052 | 2.2502  | H | -3.7766 | -1.0419 | 2.7366  | H | -1.3381 | 1.9785  | 1.3453  |
| H | -5.4004 | -0.761  | 1.0719  | H | -4.9019 | -2.0306 | 1.7998  | H | -2.9264 | 2.5177  | 1.8902  |
| H | 2.9729  | -2.503  | 1.1252  | H | 3.6133  | -1.2958 | 1.3485  | H | 3.0037  | -1.9848 | 1.1692  |
| H | 2.2152  | 0.1459  | 2.1159  | H | 2.1614  | 1.1948  | 1.8568  | H | 2.3789  | 0.8097  | 1.7608  |
| H | 3.8022  | -0.559  | 1.9827  | H | 3.8774  | 0.9418  | 1.7007  | H | 3.9363  | 0.0552  | 1.574   |
| H | 3.944   | 1.4067  | 0.7005  | H | 3.3846  | 2.5312  | 0.0401  | H | 3.9271  | 1.7837  | -0.027  |
| H | 0.3003  | 2.2029  | -2.2745 | H | -0.4651 | 1.6132  | -2.6222 | H | 0.0132  | 2.0504  | -2.7426 |
| H | 1.7129  | -3.8427 | -0.2503 | H | 2.7396  | -3.2036 | 0.4148  | H | 1.5385  | -3.5232 | 0.3072  |
| H | 0.0029  | -3.5145 | -0.0017 | H | 1.0203  | -3.31   | 0.7714  | H | -0.1292 | -3.0678 | 0.6364  |
| H | 0.8048  | -3.0279 | -1.5176 | H | 1.5797  | -2.9762 | -0.8882 | H | 0.5317  | -2.9468 | -1.0163 |
| H | -1.0127 | 2.148   | -4.3715 | H | -1.7851 | 0.725   | -4.5297 | H | -1.398  | 1.5589  | -4.7106 |
| H | -1.0835 | 0.582   | -5.2042 | H | -1.3798 | -0.9301 | -5.0301 | H | -1.5052 | -0.1457 | -5.1928 |
| H | 0.4766  | 1.2619  | -4.7135 | H | -0.1015 | 0.2735  | -4.8153 | H | 0.0757  | 0.6133  | -4.9435 |
| H | -4.5644 | 2.2614  | -4.8574 | H | -5.8947 | -0.2096 | -3.3286 | H | -4.9774 | 1.6997  | -4.9428 |
| H | -6.0472 | 1.5135  | -4.2322 | H | -4.9488 | 0.3863  | -4.7362 | H | -6.4122 | 1.0979  | -4.0882 |
| H | -5.1449 | 2.6434  | -3.1996 | H | -5.8535 | -1.1386 | -4.8407 | H | -5.425  | 2.3681  | -3.3353 |
| H | 0.9688  | 1.8921  | 1.3515  | H | 0.4291  | 2.314   | 0.8924  | H | 1.0741  | 2.4186  | 0.8601  |
| H | 0.7521  | 3.0394  | 0.0294  | H | -0.1715 | 3.0303  | -0.6033 | H | 0.6388  | 3.2858  | -0.6138 |
| H | 2.2392  | 3.0446  | 0.9646  | H | 1.2894  | 3.6543  | 0.1471  | H | 2.2373  | 3.4868  | 0.0904  |

|             |         |         |             |   |         |             |         |   |         |         |         |
|-------------|---------|---------|-------------|---|---------|-------------|---------|---|---------|---------|---------|
| H           | 2.1503  | 3.0425  | -1.9638     | H | 1.0768  | 2.9706      | -2.6943 | H | 1.8497  | 2.965   | -2.7185 |
| H           | 3.6942  | 2.7726  | -1.1869     | H | 2.6642  | 3.3181      | -2.0467 | H | 3.4726  | 2.7912  | -2.0913 |
| H           | 3.1291  | 1.6437  | -2.4268     | H | 2.4004  | 1.8291      | -2.9654 | H | 2.7611  | 1.4837  | -3.048  |
| H           | 7.0658  | -1.2674 | -1.3262     | H | 7.057   | 0.4337      | -1.7256 | H | 6.8324  | -1.2316 | -1.8892 |
| H           | 5.5116  | -2.0488 | -1.6815     | H | 5.7836  | -0.8034     | -1.7486 | H | 5.2548  | -2.0444 | -1.9484 |
| H           | 5.9622  | -0.5093 | -2.4928     | H | 5.7301  | 0.5787      | -2.8967 | H | 5.6075  | -0.6614 | -3.0412 |
| H           | 0.8146  | 1.1356  | 7.0319      | H | 0.5627  | 3.0197      | 6.5239  | H | 1.7524  | -2.11   | 7.3537  |
| H           | 0.9619  | -1.3416 | 7.002       | H | 1.4128  | 0.7542      | 7.0751  | H | -0.5124 | -3.1155 | 7.4959  |
| H           | 0.0673  | -2.6168 | 5.0798      | H | 0.9005  | -1.16       | 5.5938  | H | -2.1049 | -2.8616 | 5.6195  |
| H           | -1.1316 | 1.0909  | 3.2095      | H | -1.3297 | 1.4787      | 2.9962  | H | 0.8495  | -0.5741 | 3.4521  |
| H           | -0.2334 | 2.3411  | 5.1333      | H | -0.8067 | 3.371       | 4.4848  | H | 2.424   | -0.8427 | 5.3287  |
| <b>3D-4</b> |         |         | <b>3D-5</b> |   |         | <b>3D-6</b> |         |   |         |         |         |
| C           | -2.9321 | -0.0536 | 1.3831      | C | -3.1625 | 0.5395      | 0.9318  | C | -2.9802 | -0.512  | 1.5227  |
| C           | -1.8191 | -1.107  | 1.254       | C | -2.2428 | -0.6911     | 1.0005  | C | -1.7018 | -1.3581 | 1.3986  |
| C           | -1.1333 | -0.849  | -0.1177     | C | -1.347  | -0.6381     | -0.273  | C | -1.1027 | -1.043  | -0.0035 |
| C           | -2.1869 | -0.0385 | -0.9154     | C | -2.1118 | 0.3129      | -1.2324 | C | -2.2885 | -0.4254 | -0.7885 |
| C           | -3.4405 | 0.0666  | -0.0523     | C | -3.439  | 0.6599      | -0.5654 | C | -3.5267 | -0.5247 | 0.0967  |
| C           | 0.2746  | -0.1658 | -0.0572     | C | 0.141   | -0.2181     | -0.0217 | C | 0.1807  | -0.1476 | 0.0011  |
| C           | -1.122  | -0.1706 | -3.0207     | C | -0.7577 | -0.053      | -3.1355 | C | -1.2564 | -0.3854 | -2.9147 |
| C           | -2.4218 | -0.5831 | -2.329      | C | -2.2046 | -0.2174     | -2.6688 | C | -2.4528 | -1.01   | -2.1958 |
| C           | -2.487  | 1.2854  | 1.969       | C | -2.585  | 1.817       | 1.5385  | C | -2.77   | 0.8999  | 2.0679  |
| C           | 1.4083  | -1.1064 | 0.3606      | C | 1.0284  | -1.341      | 0.5151  | C | 1.4654  | -0.8962 | 0.356   |
| C           | 2.5561  | -0.6239 | 0.8685      | C | 2.1299  | -1.0585     | 1.2327  | C | 2.5174  | -0.2413 | 0.8778  |
| C           | 2.8967  | 0.8325  | 0.9766      | C | 2.6642  | 0.3271      | 1.4524  | C | 2.5964  | 1.2502  | 1.0262  |
| C           | 2.969   | 1.5467  | -0.3869     | C | 3.0758  | 1.0345      | 0.1428  | C | 2.5249  | 1.9988  | -0.3224 |
| C           | 0.6731  | 0.6321  | -1.3597     | C | 0.861   | 0.4962      | -1.2257 | C | 0.4072  | 0.7173  | -1.2954 |
| C           | -0.6096 | 1.008   | -2.1545     | C | -0.2023 | 1.0551      | -2.208  | C | -0.9351 | 0.8683  | -2.062  |
| C           | 1.2566  | -2.5931 | 0.1733      | C | 0.713   | -2.773      | 0.1733  | C | 1.5852  | -2.3658 | 0.0506  |
| C           | -1.2493 | 0.2142  | -4.4902     | C | -0.5875 | 0.2865      | -4.6122 | C | -1.4761 | -0.0362 | -4.3821 |
| O           | -3.5628 | 0.0813  | -2.9061     | O | -3.0665 | 0.6183      | -3.4677 | O | -3.7013 | -0.5526 | -2.752  |
| H           | -1.0353 | -1.8294 | -0.5992     | H | -1.3784 | -1.6428     | -0.7102 | H | -0.8719 | -2.0123 | -0.4608 |
| O           | -1.6392 | 1.2604  | -1.1795     | O | -1.3153 | 1.4962      | -1.4066 | O | -1.9726 | 0.9464  | -1.0662 |
| C           | -4.3372 | -0.6605 | -3.7413     | C | -4.3182 | 0.1481      | -3.709  | C | -4.3543 | -1.4196 | -3.5702 |
| C           | -5.4817 | 0.1649  | -4.2434     | C | -5.0813 | 1.1312      | -4.542  | C | -5.6303 | -0.8019 | -4.0533 |
| O           | -4.1365 | -1.8258 | -4.0508     | O | -4.7684 | -0.9147     | -3.3068 | O | -3.9661 | -2.5365 | -3.8794 |
| C           | 1.6002  | 1.9023  | -1.0753     | C | 1.917   | 1.6028      | -0.7612 | C | 1.1078  | 2.1238  | -0.9992 |
| C           | 0.8776  | 2.9801  | -0.233      | C | 1.2469  | 2.7884      | -0.0275 | C | 0.2222  | 3.0538  | -0.1363 |
| C           | 1.9708  | 2.5785  | -2.4324     | C | 2.6105  | 2.2035      | -2.023  | C | 1.3412  | 2.8688  | -2.35   |
| O           | 3.7559  | 0.7538  | -1.3149     | O | 3.8842  | 0.1355      | -0.6625 | O | 3.4318  | 1.3789  | -1.2727 |
| H           | 1.2742  | -0.0256 | -2.0042     | H | 1.4519  | -0.2484     | -1.7789 | H | 1.102   | 0.1845  | -1.9608 |
| C           | 5.1074  | 0.8169  | -1.1812     | C | 5.1883  | -0.0021     | -0.3039 | C | 4.7507  | 1.6846  | -1.1493 |
| C           | 5.7601  | -0.0679 | -2.1981     | C | 5.8656  | -0.9769     | -1.2173 | C | 5.5418  | 0.9469  | -2.1852 |
| O           | 5.7136  | 1.4891  | -0.3596     | O | 5.7402  | 0.5756      | 0.6213  | O | 5.2339  | 2.4452  | -0.3232 |
| H           | 0.1795  | 0.5694  | 0.7482      | H | 0.0689  | 0.5248      | 0.7782  | H | 0.0017  | 0.559   | 0.8171  |
| O           | -0.9079 | -1.0816 | 2.3525      | O | -1.5095 | -0.6996     | 2.2272  | O | -0.8115 | -1.0857 | 2.4826  |
| C           | -1.3067 | -1.736  | 3.4713      | C | -1.4665 | -1.8609     | 2.922   | C | -0.2971 | -2.1449 | 3.1509  |
| C           | 1.6079  | -1.4728 | 6.6045      | C | 1.009   | -1.5307     | 6.408   | C | 2.4875  | -0.913  | 6.1704  |
| C           | 0.4706  | -2.2653 | 6.7554      | C | 0.3711  | -2.7314     | 6.099   | C | 2.2098  | -2.2641 | 5.9668  |
| C           | -0.4697 | -2.3402 | 5.7259      | C | -0.4341 | -2.8216     | 4.9619  | C | 1.2984  | -2.6487 | 4.9814  |
| C           | -0.2756 | -1.6226 | 4.5377      | C | -0.6063 | -1.709      | 4.1272  | C | 0.6583  | -1.6818 | 4.1942  |
| C           | 0.8676  | -0.8248 | 4.3956      | C | 0.0374  | -0.5048     | 4.4455  | C | 0.9419  | -0.3252 | 4.406   |
| C           | 1.8068  | -0.7529 | 5.427       | C | 0.8433  | -0.4187     | 5.5831  | C | 1.8554  | 0.0556  | 5.3916  |
| O           | -2.3553 | -2.3462 | 3.6077      | O | -2.0296 | -2.9017     | 2.6224  | O | -0.5513 | -3.3206 | 2.943   |
| H           | -3.7319 | -0.4352 | 2.0293      | H | -4.0962 | 0.3282      | 1.4678  | H | -3.6862 | -1.0115 | 2.1978  |
| H           | -2.2835 | -2.1021 | 1.1847      | H | -2.888  | -1.5768     | 0.9163  | H | -2.0158 | -2.4113 | 1.3943  |
| H           | -4.1128 | -0.7757 | -0.2586     | H | -4.2043 | -0.0783     | -0.831  | H | -4.0396 | -1.4791 | -0.0767 |
| H           | -3.9931 | 0.9978  | -0.2147     | H | -3.8056 | 1.6554      | -0.8358 | H | -4.2401 | 0.288   | -0.0752 |
| H           | -0.4136 | -1.0073 | -2.9693     | H | -0.2213 | -0.9943     | -2.9594 | H | -0.4151 | -1.0892 | -2.8756 |
| H           | -2.5614 | -1.67   | -2.3159     | H | -2.5118 | -1.268      | -2.7209 | H | -2.4048 | -2.1047 | -2.1779 |
| H           | -2.1452 | 1.1661  | 3.0021      | H | -2.4357 | 1.7022      | 2.6171  | H | -2.4148 | 0.868   | 3.1032  |
| H           | -1.6771 | 1.746   | 1.3996      | H | -1.627  | 2.0968      | 1.0967  | H | -2.0465 | 1.4725  | 1.4842  |
| H           | -3.3246 | 1.9912  | 1.9809      | H | -3.2757 | 2.6542      | 1.3908  | H | -3.7144 | 1.4545  | 2.0627  |
| H           | 3.3463  | -1.3113 | 1.1663      | H | 2.754   | -1.8673     | 1.6093  | H | 3.4264  | -0.7864 | 1.1267  |
| H           | 2.2212  | 1.3409  | 1.6717      | H | 1.9667  | 0.9292      | 2.0428  | H | 1.8507  | 1.6153  | 1.7391  |
| H           | 3.8863  | 0.8853  | 1.4486      | H | 3.5562  | 0.2193      | 2.083   | H | 3.5676  | 1.4648  | 1.4905  |
| H           | 3.4944  | 2.4989  | -0.222      | H | 3.7012  | 1.8938      | 0.4261  | H | 2.8746  | 3.0251  | -0.1374 |

|             |         |         |             |   |         |             |         |   |         |         |         |
|-------------|---------|---------|-------------|---|---------|-------------|---------|---|---------|---------|---------|
| H           | -0.4991 | 1.9086  | -2.7578     | H | 0.149   | 1.9074      | -2.7895 | H | -0.9879 | 1.7723  | -2.6687 |
| H           | 2.1732  | -3.1368 | 0.4279      | H | 1.4901  | -3.461      | 0.5241  | H | 2.5923  | -2.7477 | 0.2515  |
| H           | 0.4613  | -2.992  | 0.8093      | H | -0.2276 | -3.0943     | 0.6254  | H | 0.8922  | -2.9569 | 0.6532  |
| H           | 1.0302  | -2.8225 | -0.8731     | H | 0.6437  | -2.8941     | -0.9128 | H | 1.3785  | -2.5482 | -1.0091 |
| H           | -1.9057 | 1.079   | -4.6322     | H | -1.0293 | 1.2562      | -4.8644 | H | -2.2727 | 0.7036  | -4.5127 |
| H           | -1.6449 | -0.6203 | -5.0774     | H | -1.0557 | -0.478      | -5.2408 | H | -1.7355 | -0.9292 | -4.9593 |
| H           | -0.2676 | 0.4747  | -4.9005     | H | 0.4758  | 0.3316      | -4.871  | H | -0.5612 | 0.3849  | -4.8129 |
| H           | -6.0873 | 0.5098  | -3.4015     | H | -4.5672 | 1.2887      | -5.4935 | H | -6.2705 | -0.5594 | -3.2015 |
| H           | -5.1018 | 1.0132  | -4.8181     | H | -6.0795 | 0.7343      | -4.7476 | H | -5.4092 | 0.0952  | -4.6371 |
| H           | -6.1106 | -0.4468 | -4.8965     | H | -5.185  | 2.074       | -3.9992 | H | -6.1584 | -1.5144 | -4.6934 |
| H           | 0.6014  | 2.6293  | 0.7634      | H | 0.773   | 2.4962      | 0.9116  | H | 0.031   | 2.6556  | 0.8622  |
| H           | -0.0346 | 3.3337  | -0.7241     | H | 0.4862  | 3.2717      | -0.6486 | H | -0.7461 | 3.2451  | -0.6093 |
| H           | 1.5207  | 3.8574  | -0.0934     | H | 1.9877  | 3.5585      | 0.2196  | H | 0.7042  | 4.0295  | -0.0001 |
| H           | 1.1368  | 3.1396  | -2.8643     | H | 1.9554  | 2.8818      | -2.5778 | H | 0.4165  | 3.2762  | -2.7695 |
| H           | 2.7844  | 3.3024  | -2.3023     | H | 3.4912  | 2.7944      | -1.7439 | H | 2.0148  | 3.7239  | -2.2163 |
| H           | 2.2986  | 1.8403  | -3.1725     | H | 2.9419  | 1.4185      | -2.7115 | H | 1.7882  | 2.2083  | -3.1011 |
| H           | 6.8465  | -0.0094 | -2.0858     | H | 6.9136  | -1.0822     | -0.9224 | H | 6.6011  | 1.198   | -2.0794 |
| H           | 5.4488  | -1.1038 | -2.0418     | H | 5.3821  | -1.9539     | -1.1401 | H | 5.4234  | -0.1303 | -2.0436 |
| H           | 5.4955  | 0.2663  | -3.2044     | H | 5.8283  | -0.6085     | -2.2456 | H | 5.2115  | 1.243   | -3.184  |
| H           | 2.3398  | -1.415  | 7.4067      | H | 1.6371  | -1.4617     | 7.2929  | H | 3.1988  | -0.6144 | 6.9368  |
| H           | 0.3148  | -2.8249 | 7.6745      | H | 0.5009  | -3.5983     | 6.7422  | H | 2.7035  | -3.019  | 6.5738  |
| H           | -1.3546 | -2.961  | 5.8535      | H | -0.9258 | -3.764      | 4.7278  | H | 1.0903  | -3.706  | 4.8285  |
| H           | 1.039   | -0.2519 | 3.4885      | H | -0.0749 | 0.3728      | 3.8139  | H | 0.4636  | 0.4458  | 3.8073  |
| H           | 2.6931  | -0.1338 | 5.3111      | H | 1.3432  | 0.5162      | 5.8247  | H | 2.075   | 1.1086  | 5.5504  |
| <b>3D-7</b> |         |         | <b>3D-8</b> |   |         | <b>3D-9</b> |         |   |         |         |         |
| C           | -2.8512 | -2.0453 | 0.0068      | C | -3.0476 | -1.8268     | 0.0499  | C | -2.9817 | -2.122  | 0.1268  |
| C           | -1.3866 | -2.0615 | 0.471       | C | -1.5905 | -1.9484     | 0.5196  | C | -1.5091 | -2.1144 | 0.5583  |
| C           | -0.6147 | -1.4218 | -0.7192     | C | -0.7716 | -1.3856     | -0.6769 | C | -0.7847 | -1.5227 | -0.6851 |
| C           | -1.6795 | -0.5045 | -1.4001     | C | -1.7504 | -0.3695     | -1.3426 | C | -1.8367 | -0.5431 | -1.2871 |
| C           | -2.9774 | -0.6591 | -0.6129     | C | -3.0739 | -0.44       | -0.5833 | C | -3.1476 | -0.7511 | -0.5249 |
| C           | 0.7337  | -0.6956 | -0.3602     | C | 0.6421  | -0.7923     | -0.3213 | C | 0.622   | -0.8877 | -0.3949 |
| C           | -0.4312 | -0.1459 | -3.3736     | C | -0.4869 | -0.0816     | -3.3164 | C | -0.6248 | -0.0367 | -3.2529 |
| C           | -1.7503 | -0.7746 | -2.9138     | C | -1.8537 | -0.5951     | -2.8608 | C | -1.941  | -0.6801 | -2.8153 |
| C           | -3.8813 | -2.2876 | 1.0988      | C | -4.0959 | -1.9857     | 1.1402  | C | -3.9719 | -2.3543 | 1.2581  |
| C           | 1.9284  | -1.6519 | -0.1179     | C | 1.7449  | -1.8592     | -0.1056 | C | 1.8016  | -1.8834 | -0.3789 |
| C           | 3.2217  | -1.2652 | -0.0759     | C | 3.0693  | -1.596      | -0.0777 | C | 3.0938  | -1.5118 | -0.2517 |
| C           | 3.8128  | 0.1134  | -0.1089     | C | 3.786   | -0.278      | -0.1022 | C | 3.6871  | -0.1517 | -0.0166 |
| C           | 2.8862  | 1.2445  | 0.3538      | C | 2.9762  | 0.9254      | 0.3967  | C | 2.7575  | 0.9248  | 0.5601  |
| C           | 1.1174  | 0.4368  | -1.402      | C | 1.1186  | 0.3191      | -1.3465 | C | 0.9797  | 0.358   | -1.2928 |
| C           | -0.1063 | 0.8689  | -2.2513     | C | -0.0687 | 0.8771      | -2.1732 | C | -0.261  | 0.8784  | -2.0571 |
| C           | 1.663   | -3.1233 | 0.1137      | C | 1.3451  | -3.301      | 0.1186  | C | 1.525   | -3.3619 | -0.5274 |
| C           | -0.4703 | 0.5054  | -4.752      | C | -0.4585 | 0.6038      | -4.6778 | C | -0.6689 | 0.7314  | -4.5688 |
| O           | -2.8537 | -0.0791 | -3.5251     | O | -2.9154 | 0.2168      | -3.4001 | O | -3.0682 | 0.0812  | -3.2932 |
| H           | -0.405  | -2.2402 | -1.4201     | H | -0.647  | -2.2164     | -1.3833 | H | -0.684  | -2.3478 | -1.4    |
| O           | -1.2328 | 0.8532  | -1.3596     | O | -1.187  | 0.9415      | -1.2714 | O | -1.3653 | 0.7983  | -1.1387 |
| C           | -3.9358 | -0.834  | -3.8537     | C | -3.6257 | -0.3171     | -4.4286 | C | -3.7553 | -0.4433 | -4.3421 |
| C           | -4.9824 | 0.0243  | -4.4944     | C | -4.6909 | 0.6413      | -4.8641 | C | -4.8923 | 0.4597  | -4.7092 |
| O           | -4.0532 | -2.0337 | -3.6501     | O | -3.431  | -1.412      | -4.936  | O | -3.4924 | -1.4914 | -4.9134 |
| C           | 1.8368  | 1.6825  | -0.723      | C | 1.9571  | 1.48        | -0.6552 | C | 1.7173  | 1.5016  | -0.4664 |
| C           | 0.8295  | 2.6253  | -0.0149     | C | 1.0495  | 2.4958      | 0.0855  | C | 0.72    | 2.369   | 0.3449  |
| C           | 2.5366  | 2.5208  | -1.8303     | C | 2.7164  | 2.2734      | -1.7564 | C | 2.4311  | 2.4524  | -1.4663 |
| O           | 3.6977  | 2.3966  | 0.7056      | O | 3.896   | 1.9899      | 0.7575  | O | 3.5709  | 2.0216  | 1.0575  |
| H           | 1.8486  | 0.0198  | -2.1098     | H | 1.8011  | -0.1502     | -2.07   | H | 1.6987  | 0.0397  | -2.0622 |
| C           | 4.219   | 2.4221  | 1.9622      | C | 4.4384  | 1.9385      | 2.0042  | C | 4.0747  | 1.8939  | 2.3155  |
| C           | 4.9974  | 3.6861  | 2.1627      | C | 5.3323  | 3.1213      | 2.2175  | C | 4.839   | 3.1289  | 2.6819  |
| O           | 4.0871  | 1.5518  | 2.8095      | O | 4.242   | 1.0641      | 2.8347  | O | 3.9417  | 0.9241  | 3.0471  |
| H           | 0.5573  | -0.1961 | 0.5978      | H | 0.5228  | -0.2962     | 0.6473  | H | 0.5553  | -0.513  | 0.6272  |
| O           | -1.2306 | -1.2511 | 1.6463      | O | -1.3791 | -1.135      | 1.6838  | O | -1.3642 | -1.2493 | 1.6967  |
| C           | -1.0407 | -1.8961 | 2.8226      | C | -1.2289 | -1.7761     | 2.868   | C | -0.5854 | -1.6936 | 2.7139  |
| C           | -0.4238 | 0.8583  | 6.0496      | C | -0.4183 | 0.9737      | 6.0557  | C | 0.1672  | 1.4613  | 5.5092  |
| C           | -0.3999 | -0.5176 | 6.2739      | C | -0.4586 | -0.3996     | 6.2934  | C | 1.0065  | 0.3492  | 5.4491  |
| C           | -0.6047 | -1.4015 | 5.2126      | C | -0.7259 | -1.282      | 5.2449  | C | 0.7415  | -0.678  | 4.5419  |
| C           | -0.835  | -0.9122 | 3.9198      | C | -0.9542 | -0.7938     | 3.9513  | C | -0.3621 | -0.5915 | 3.6848  |
| C           | -0.8596 | 0.4729  | 3.7023      | C | -0.9141 | 0.5888      | 3.7202  | C | -1.2028 | 0.5284  | 3.7489  |
| C           | -0.6532 | 1.3537  | 4.7665      | C | -0.6457 | 1.4681      | 4.7717  | C | -0.9368 | 1.5513  | 4.6617  |
| O           | -1.0324 | -3.1055 | 2.9857      | O | -1.3009 | -2.9812     | 3.0462  | O | -0.0771 | -2.7983 | 2.8057  |

|              |         |         |         |   |         |         |         |   |         |         |         |
|--------------|---------|---------|---------|---|---------|---------|---------|---|---------|---------|---------|
| H            | -2.9843 | -2.803  | -0.7772 | H | -3.2332 | -2.5792 | -0.7287 | H | -3.1263 | -2.8999 | -0.6353 |
| H            | -1.06   | -3.0923 | 0.638   | H | -1.3444 | -2.9985 | 0.7021  | H | -1.1841 | -3.1363 | 0.7745  |
| H            | -3.8823 | -0.5699 | -1.2174 | H | -3.9547 | -0.3166 | -1.2205 | H | -4.0353 | -0.7359 | -1.1647 |
| H            | -3.0477 | 0.1154  | 0.1622  | H | -3.1212 | 0.3469  | 0.1803  | H | -3.2831 | 0.0348  | 0.2289  |
| H            | 0.3425  | -0.9237 | -3.4093 | H | 0.2111  | -0.9269 | -3.3697 | H | 0.133   | -0.8227 | -3.3665 |
| H            | -1.7727 | -1.8421 | -3.1608 | H | -2.0037 | -1.6542 | -3.0983 | H | -2.0141 | -1.7306 | -3.1178 |
| H            | -3.7165 | -3.259  | 1.5758  | H | -4.0032 | -2.963  | 1.6246  | H | -3.7788 | -3.3148 | 1.7467  |
| H            | -3.8497 | -1.5156 | 1.8744  | H | -4.0101 | -1.2126 | 1.9106  | H | -3.919  | -1.5696 | 2.0198  |
| H            | -4.8915 | -2.2871 | 0.6757  | H | -5.1022 | -1.9149 | 0.714   | H | -4.9962 | -2.371  | 0.8712  |
| H            | 3.9844  | -2.0327 | 0.0688  | H | 3.7584  | -2.4331 | 0.0487  | H | 3.857   | -2.2913 | -0.2856 |
| H            | 4.6893  | 0.0945  | 0.5524  | H | 4.6691  | -0.3893 | 0.541   | H | 4.5217  | -0.2934 | 0.6828  |
| H            | 4.2252  | 0.3122  | -1.104  | H | 4.1966  | -0.1015 | -1.1022 | H | 4.1624  | 0.1978  | -0.9401 |
| H            | 2.3481  | 0.9275  | 1.2571  | H | 2.4234  | 0.6419  | 1.3024  | H | 2.2125  | 0.5074  | 1.4164  |
| H            | -0.0071 | 1.8765  | -2.6593 | H | 0.115   | 1.8813  | -2.5597 | H | -0.1536 | 1.917   | -2.3774 |
| H            | 2.5869  | -3.7028 | 0.2263  | H | 2.2117  | -3.9657 | 0.2145  | H | 2.4387  | -3.965  | -0.4727 |
| H            | 1.0993  | -3.266  | 1.0384  | H | 0.7824  | -3.3974 | 1.0501  | H | 0.874   | -3.7199 | 0.2724  |
| H            | 1.1253  | -3.5726 | -0.7249 | H | 0.7566  | -3.6907 | -0.7156 | H | 1.0699  | -3.5783 | -1.4982 |
| H            | -1.163  | 1.3529  | -4.7862 | H | -1.089  | 1.4987  | -4.7002 | H | -1.3639 | 1.5765  | -4.5277 |
| H            | -0.7759 | -0.2194 | -5.5134 | H | -0.7987 | -0.0786 | -5.4631 | H | -0.9706 | 0.0754  | -5.3913 |
| H            | 0.5225  | 0.8806  | -5.0226 | H | 0.5626  | 0.9143  | -4.9246 | H | 0.3224  | 1.1318  | -4.8075 |
| H            | -4.5751 | 0.4988  | -5.3908 | H | -4.2323 | 1.5656  | -5.2244 | H | -4.5059 | 1.4336  | -5.0199 |
| H            | -5.8324 | -0.5984 | -4.7873 | H | -5.2677 | 0.1961  | -5.6798 | H | -5.4482 | 0.022   | -5.5433 |
| H            | -5.3288 | 0.7781  | -3.7829 | H | -5.3681 | 0.8463  | -4.0311 | H | -5.5697 | 0.5672  | -3.8583 |
| H            | 0.2439  | 2.0911  | 0.7399  | H | 0.4279  | 2.0021  | 0.839   | H | 0.1221  | 1.7567  | 1.0274  |
| H            | 0.1307  | 3.0883  | -0.7184 | H | 0.386   | 3.0339  | -0.5986 | H | 0.0332  | 2.9234  | -0.3023 |
| H            | 1.3441  | 3.4483  | 0.4944  | H | 1.6437  | 3.2584  | 0.6021  | H | 1.2427  | 3.1174  | 0.9515  |
| H            | 1.8266  | 2.9064  | -2.5677 | H | 2.0353  | 2.7373  | -2.4757 | H | 1.7273  | 2.9185  | -2.1624 |
| H            | 3.0495  | 3.3961  | -1.417  | H | 3.3126  | 3.0897  | -1.3339 | H | 2.9446  | 3.2731  | -0.9537 |
| H            | 3.278   | 1.9274  | -2.3744 | H | 3.3933  | 1.6261  | -2.3227 | H | 3.1746  | 1.9179  | -2.066  |
| H            | 5.3975  | 3.7078  | 3.1804  | H | 5.7493  | 3.0832  | 3.2279  | H | 5.2198  | 3.0301  | 3.7025  |
| H            | 5.832   | 3.7227  | 1.4582  | H | 6.1552  | 3.0981  | 1.4988  | H | 5.6861  | 3.2554  | 2.0032  |
| H            | 4.3417  | 4.5502  | 2.0287  | H | 4.7563  | 4.0444  | 2.1142  | H | 4.1789  | 3.9991  | 2.6408  |
| H            | -0.2599 | 1.5458  | 6.8759  | H | -0.2061 | 1.6597  | 6.8721  | H | 0.3775  | 2.2607  | 6.2154  |
| H            | -0.2181 | -0.9033 | 7.2739  | H | -0.2783 | -0.7846 | 7.294   | H | 1.8747  | 0.2838  | 6.1004  |
| H            | -0.5803 | -2.4738 | 5.3972  | H | -0.7515 | -2.3525 | 5.4399  | H | 1.4103  | -1.5353 | 4.493   |
| H            | -1.0355 | 0.8815  | 2.7103  | H | -1.088  | 0.9964  | 2.7274  | H | -2.0639 | 0.6176  | 3.0911  |
| H            | -0.6683 | 2.4269  | 4.593   | H | -0.6114 | 2.5391  | 4.5878  | H | -1.5882 | 2.4204  | 4.708   |
| <b>3D-10</b> |         |         |         |   |         |         |         |   |         |         |         |
| C            | -2.9072 | -1.9208 | 0.2665  |   |         |         |         |   |         |         |         |
| C            | -1.4888 | -1.7755 | 0.8337  |   |         |         |         |   |         |         |         |
| C            | -0.7169 | -1.2397 | -0.3944 |   |         |         |         |   |         |         |         |
| C            | -1.7079 | -0.2699 | -1.0688 |   |         |         |         |   |         |         |         |
| C            | -3.1012 | -0.6206 | -0.5251 |   |         |         |         |   |         |         |         |
| C            | 0.669   | -0.6058 | -0.0671 |   |         |         |         |   |         |         |         |
| C            | -0.6922 | 1.0286  | -2.8456 |   |         |         |         |   |         |         |         |
| C            | -1.4731 | -0.2681 | -2.6043 |   |         |         |         |   |         |         |         |
| C            | -3.9993 | -2.1384 | 1.3024  |   |         |         |         |   |         |         |         |
| C            | 1.7927  | -1.6501 | -0.0148 |   |         |         |         |   |         |         |         |
| C            | 2.9401  | -1.4176 | 0.6455  |   |         |         |         |   |         |         |         |
| C            | 3.3268  | -0.1113 | 1.2625  |   |         |         |         |   |         |         |         |
| C            | 3.4122  | 1.032   | 0.2352  |   |         |         |         |   |         |         |         |
| C            | 1.0451  | 0.6492  | -0.9462 |   |         |         |         |   |         |         |         |
| C            | -0.2327 | 1.4132  | -1.4371 |   |         |         |         |   |         |         |         |
| C            | 1.639   | -2.9712 | -0.7261 |   |         |         |         |   |         |         |         |
| C            | -1.5378 | 2.147   | -3.4654 |   |         |         |         |   |         |         |         |
| O            | -2.6688 | -0.3024 | -3.3947 |   |         |         |         |   |         |         |         |
| H            | -0.6143 | -2.0958 | -1.0699 |   |         |         |         |   |         |         |         |
| O            | -1.3525 | 1.0514  | -0.6223 |   |         |         |         |   |         |         |         |
| C            | -3.1342 | -1.5462 | -3.6961 |   |         |         |         |   |         |         |         |
| C            | -4.3569 | -1.4434 | -4.5542 |   |         |         |         |   |         |         |         |
| O            | -2.6415 | -2.5967 | -3.3107 |   |         |         |         |   |         |         |         |
| C            | 2.053   | 1.6687  | -0.2252 |   |         |         |         |   |         |         |         |
| C            | 1.3956  | 2.3638  | 0.9941  |   |         |         |         |   |         |         |         |
| C            | 2.4424  | 2.7958  | -1.235  |   |         |         |         |   |         |         |         |
| O            | 4.1341  | 0.5908  | -0.9446 |   |         |         |         |   |         |         |         |
| H            | 1.5779  | 0.2866  | -1.8367 |   |         |         |         |   |         |         |         |





| Conformations | Energy (a.u) | $\Delta G$ (kcal/mol) | %      | Number of imaginary frequencies |
|---------------|--------------|-----------------------|--------|---------------------------------|
| <b>3E-1</b>   | -1731.970919 | 0.000225901           | 35.80% | 0                               |
| <b>3E-2</b>   | -1731.969664 | 0.788131092           | 9.46%  | 0                               |
| <b>3E-3</b>   | -1731.97092  | 0                     | 35.81% | 0                               |
| <b>3E-4</b>   | -1731.969664 | 0.788118542           | 9.46%  | 0                               |
| <b>3E-5</b>   | -1731.969664 | 0.788055792           | 9.46%  | 0                               |

**Table S20.** Optimized Z-matrixes of isomer **3E** in the gas phase ( $\text{\AA}$ ) at B3LYP/6-31G\* level.

| 3E-1 |         |         | 3E-2    |   |         | 3E-3    |         |   |         |         |         |
|------|---------|---------|---------|---|---------|---------|---------|---|---------|---------|---------|
| C    | -3.3577 | -0.8569 | -0.3307 | C | -3.4467 | -0.8869 | -0.304  | C | -3.1852 | -0.7384 | -0.2756 |
| C    | -2.1204 | -1.4366 | 0.3742  | C | -2.2081 | -1.4808 | 0.3833  | C | -2.0334 | -1.4676 | 0.4391  |
| C    | -1.078  | -1.4263 | -0.7706 | C | -1.1735 | -1.4577 | -0.7697 | C | -0.9146 | -1.4602 | -0.6457 |
| C    | -1.3545 | -0.0713 | -1.4671 | C | -1.4337 | -0.0782 | -1.4241 | C | -1.1769 | -0.1487 | -1.4468 |
| C    | -2.7927 | 0.335   | -1.1109 | C | -2.8879 | 0.3001  | -1.0984 | C | -2.4569 | 0.4646  | -0.8734 |
| C    | 0.445   | -1.674  | -0.4575 | C | 0.3439  | -1.7366 | -0.4604 | C | 0.5898  | -1.7414 | -0.2609 |
| C    | 0.2953  | 0.8245  | -2.9925 | C | 0.2514  | 0.8683  | -2.8828 | C | 0.2962  | -0.519  | -3.2782 |
| C    | -0.9395 | -0.0878 | -2.9651 | C | -1.0001 | -0.0229 | -2.9153 | C | -1.1934 | -0.3765 | -2.9709 |
| C    | -4.5052 | -0.4597 | 0.5858  | C | -4.5812 | -0.4817 | 0.6253  | C | -4.3554 | -0.3255 | 0.6037  |
| C    | 0.7732  | -2.0436 | 0.9871  | C | 0.6569  | -2.1824 | 0.9659  | C | 0.8725  | -1.8571 | 1.2315  |
| C    | 1.4246  | -1.2523 | 1.858   | C | 1.3077  | -1.4407 | 1.8799  | C | 1.3781  | -0.8655 | 1.987   |
| C    | 1.9043  | 0.1292  | 1.5752  | C | 1.7985  | -0.05   | 1.6687  | C | 1.688   | 0.5024  | 1.4841  |
| C    | 3.0927  | 0.2091  | 0.603   | C | 2.9964  | 0.0691  | 0.7127  | C | 2.8938  | 0.6052  | 0.5356  |
| C    | 1.415   | -0.6805 | -1.233  | C | 1.3274  | -0.7175 | -1.177  | C | 1.661   | -0.9868 | -1.1713 |
| C    | 0.778   | 0.7125  | -1.5427 | C | 0.7029  | 0.6918  | -1.4296 | C | 0.9883  | 0.1094  | -2.0433 |
| C    | 0.4247  | -3.4564 | 1.4033  | C | 0.2934  | -3.6108 | 1.308   | C | 0.6114  | -3.211  | 1.8507  |
| C    | -0.0244 | 2.2766  | -3.3623 | C | -0.0316 | 2.3434  | -3.1899 | C | 0.7608  | 0.1215  | -4.5833 |
| O    | -1.9309 | 0.3675  | -3.8921 | O | -2.0187 | 0.4932  | -3.7811 | O | -1.7131 | 0.7714  | -3.672  |
| H    | -1.3933 | -2.2252 | -1.4599 | H | -1.5029 | -2.2316 | -1.4809 | H | -1.1984 | -2.2883 | -1.3153 |
| O    | -0.4508 | 0.8572  | -0.8286 | O | -0.5408 | 0.8193  | -0.7333 | O | -0.0583 | 0.7207  | -1.2731 |
| C    | -2.8307 | -0.5752 | -4.2874 | C | -1.8582 | 0.2188  | -5.1048 | C | -2.9479 | 0.6388  | -4.2259 |
| C    | -3.7876 | 0.0104  | -5.279  | C | -2.984  | 0.816   | -5.8913 | C | -3.3267 | 1.9015  | -4.9364 |
| O    | -2.8677 | -1.728  | -3.8819 | O | -0.9328 | -0.4157 | -5.5899 | O | -3.6583 | -0.3532 | -4.151  |
| C    | 2.9174  | -0.5801 | -0.7466 | C | 2.8267  | -0.6515 | -0.6752 | C | 3.0395  | -0.5394 | -0.5242 |
| C    | 3.7625  | 0.0976  | -1.8686 | C | 3.6855  | 0.0741  | -1.756  | C | 4.0167  | -0.0688 | -1.652  |
| C    | 3.5419  | -1.9969 | -0.6078 | C | 3.4404  | -2.078  | -0.601  | C | 3.7877  | -1.7622 | 0.0866  |
| O    | 3.3018  | 1.616   | 0.31    | O | 3.2172  | 1.4871  | 0.491   | O | 2.7778  | 1.8707  | -0.1663 |
| H    | 1.5238  | -1.1668 | -2.2167 | H | 1.4416  | -1.1598 | -2.1808 | H | 1.9952  | -1.7552 | -1.8873 |
| C    | 4.0375  | 2.3285  | 1.2054  | C | 3.9495  | 2.1496  | 1.4266  | C | 3.1556  | 2.9886  | 0.5078  |
| C    | 4.1408  | 3.7535  | 0.7557  | C | 4.068   | 3.5938  | 1.0473  | C | 2.9393  | 4.1956  | -0.3523 |
| O    | 4.5438  | 1.8885  | 2.2268  | O | 4.4418  | 1.6569  | 2.4307  | O | 3.6064  | 3.0214  | 1.6434  |
| H    | 0.6544  | -2.6241 | -0.9802 | H | 0.5469  | -2.6614 | -1.0291 | H | 0.7311  | -2.7839 | -0.5969 |
| O    | -1.7352 | -0.5632 | 1.4438  | O | -1.8145 | -0.6288 | 1.466   | O | -1.6796 | -0.7018 | 1.6002  |
| C    | -1.9929 | -0.9802 | 2.7059  | C | -2.0728 | -1.067  | 2.721   | C | -2.0845 | -1.186  | 2.8007  |
| C    | -0.7081 | 1.9113  | 5.5968  | C | -0.7756 | 1.7679  | 5.6615  | C | -0.9714 | 1.4198  | 6.015   |
| C    | -0.7273 | 2.2601  | 4.2467  | C | -0.8067 | 2.1447  | 4.3192  | C | -0.894  | 1.8851  | 4.7026  |
| C    | -1.1464 | 1.3325  | 3.2906  | C | -1.2299 | 1.2358  | 3.3472  | C | -1.2577 | 1.052   | 3.6425  |
| C    | -1.5436 | 0.0467  | 3.6837  | C | -1.6191 | -0.0595 | 3.7166  | C | -1.6926 | -0.2565 | 3.8929  |
| C    | -1.5276 | -0.2938 | 5.0427  | C | -1.5915 | -0.4283 | 5.068   | C | -1.7755 | -0.714  | 5.2147  |
| C    | -1.1091 | 0.6367  | 5.9958  | C | -1.1688 | 0.4837  | 6.0369  | C | -1.4139 | 0.1227  | 6.2723  |
| O    | -2.5121 | -2.0374 | 3.0276  | O | -2.5965 | -2.1277 | 3.0234  | O | -2.6803 | -2.2345 | 2.992   |
| H    | -3.7317 | -1.6    | -1.0482 | H | -3.8355 | -1.6276 | -1.0168 | H | -3.5659 | -1.3743 | -1.0865 |
| H    | -2.3218 | -2.4561 | 0.716   | H | -2.4124 | -2.505  | 0.7088  | H | -2.31   | -2.4977 | 0.6895  |
| H    | -2.7925 | 1.2409  | -0.4913 | H | -2.9222 | 1.2237  | -0.5077 | H | -2.2128 | 1.2088  | -0.104  |
| H    | -3.4306 | 0.5476  | -1.9711 | H | -3.5156 | 0.4562  | -1.98   | H | -3.082  | 0.9791  | -1.6059 |
| H    | 1.0452  | 0.459   | -3.7034 | H | 1.01    | 0.5199  | -3.5928 | H | 0.5341  | -1.5875 | -3.3504 |
| H    | -0.615  | -1.0929 | -3.2672 | H | -0.7415 | -1.0379 | -3.2442 | H | -1.7318 | -1.2877 | -3.2543 |
| H    | -4.2215 | 0.3372  | 1.2805  | H | -4.2834 | 0.3127  | 1.3171  | H | -4.0618 | 0.3946  | 1.374   |
| H    | -5.3539 | -0.0959 | -0.0031 | H | -5.4336 | -0.1111 | 0.0463  | H | -5.1365 | 0.1461  | -0.0022 |
| H    | -4.8455 | -1.3193 | 1.1719  | H | -4.9217 | -1.3389 | 1.2148  | H | -4.7939 | -1.1983 | 1.0975  |
| H    | 1.6445  | -1.6224 | 2.8586  | H | 1.5181  | -1.8616 | 2.8623  | H | 1.5739  | -1.0357 | 3.0443  |
| H    | 2.1928  | 0.5905  | 2.5289  | H | 2.0793  | 0.3638  | 2.6461  | H | 1.8691  | 1.1486  | 2.353   |
| H    | 1.0765  | 0.7566  | 1.2306  | H | 0.9781  | 0.5978  | 1.3447  | H | 0.7932  | 0.9383  | 1.0273  |

|             |         |         |         |             |         |         |         |   |         |         |         |  |
|-------------|---------|---------|---------|-------------|---------|---------|---------|---|---------|---------|---------|--|
| H           | 3.9934  | -0.1776 | 1.0995  | H           | 3.89    | -0.348  | 1.1972  | H | 3.8184  | 0.6237  | 1.1294  |  |
| H           | 1.4246  | 1.5485  | -1.2749 | H           | 1.3508  | 1.5092  | -1.1117 | H | 1.6712  | 0.9018  | -2.346  |  |
| H           | -0.6283 | -3.6827 | 1.2292  | H           | -0.7592 | -3.8197 | 1.1104  | H | -0.409  | -3.5466 | 1.6489  |  |
| H           | 1.0236  | -4.1718 | 0.8297  | H           | 0.8938  | -4.3019 | 0.7067  | H | 1.3031  | -3.9521 | 1.4364  |  |
| H           | 0.6237  | -3.636  | 2.4653  | H           | 0.4782  | -3.8439 | 2.3622  | H | 0.7455  | -3.2014 | 2.9376  |  |
| H           | -0.3484 | 2.3496  | -4.4057 | H           | -0.3168 | 2.4784  | -4.2379 | H | 0.2077  | -0.2887 | -5.4346 |  |
| H           | 0.8662  | 2.9042  | -3.2501 | H           | 0.8651  | 2.9482  | -3.0164 | H | 1.8254  | -0.0789 | -4.7459 |  |
| H           | -0.8146 | 2.6978  | -2.7317 | H           | -0.8354 | 2.7468  | -2.565  | H | 0.6276  | 1.2084  | -4.5769 |  |
| H           | -4.3675 | 0.8072  | -4.8068 | H           | -3.9353 | 0.3972  | -5.5535 | H | -3.391  | 2.724   | -4.2198 |  |
| H           | -3.2385 | 0.3935  | -6.1429 | H           | -2.9792 | 1.9029  | -5.7772 | H | -2.5917 | 2.1243  | -5.714  |  |
| H           | -4.4747 | -0.768  | -5.6226 | H           | -2.8542 | 0.575   | -6.9502 | H | -4.304  | 1.7717  | -5.4101 |  |
| H           | 3.7335  | -0.4926 | -2.7921 | H           | 3.6592  | -0.4695 | -2.7078 | H | 4.1565  | -0.8564 | -2.4018 |  |
| H           | 4.8133  | 0.1849  | -1.5676 | H           | 4.7346  | 0.1382  | -1.4433 | H | 5.0035  | 0.169   | -1.2361 |  |
| H           | 3.4127  | 1.1027  | -2.1211 | H           | 3.3453  | 1.0932  | -1.961  | H | 3.6855  | 0.8263  | -2.1829 |  |
| H           | 3.1712  | -2.5623 | 0.2471  | H           | 3.0583  | -2.6821 | 0.2217  | H | 3.343   | -2.1711 | 0.9909  |  |
| H           | 3.359   | -2.5963 | -1.507  | H           | 3.2614  | -2.6312 | -1.5302 | H | 3.8542  | -2.5802 | -0.6405 |  |
| H           | 4.6292  | -1.9305 | -0.4778 | H           | 4.5269  | -2.0259 | -0.4587 | H | 4.8147  | -1.4903 | 0.3612  |  |
| H           | 3.1438  | 4.1979  | 0.7019  | H           | 3.0751  | 4.0487  | 1.0076  | H | 1.8803  | 4.2832  | -0.6078 |  |
| H           | 4.7366  | 4.3194  | 1.4776  | H           | 4.6627  | 4.1189  | 1.8002  | H | 3.2404  | 5.0917  | 0.1978  |  |
| H           | 4.6362  | 3.8     | -0.2174 | H           | 4.5716  | 3.683   | 0.0814  | H | 3.5486  | 4.1202  | -1.2565 |  |
| H           | -0.3801 | 2.6345  | 6.3396  | H           | -0.4443 | 2.4766  | 6.4167  | H | -0.6872 | 2.0702  | 6.8388  |  |
| H           | -0.4149 | 3.2541  | 3.9368  | H           | -0.5005 | 3.1463  | 4.0278  | H | -0.5487 | 2.8968  | 4.5035  |  |
| H           | -1.1544 | 1.6217  | 2.2416  | H           | -1.2471 | 1.5468  | 2.3046  | H | -1.194  | 1.4333  | 2.6263  |  |
| H           | -1.8379 | -1.2867 | 5.3622  | H           | -1.8957 | -1.4287 | 5.369   | H | -2.1195 | -1.7251 | 5.424   |  |
| H           | -1.0953 | 0.3662  | 7.0487  | H           | -1.1455 | 0.1914  | 7.0838  | H | -1.477  | -0.238  | 7.2959  |  |
| <b>3E-4</b> |         |         |         | <b>3E-5</b> |         |         |         |   |         |         |         |  |
| C           | -3.2314 | -0.6786 | -0.401  | C           | -3.16   | -1.072  | -0.018  |   |         |         |         |  |
| C           | -2.1206 | -1.4326 | 0.3505  | C           | -1.8284 | -1.4223 | 0.668   |   |         |         |         |  |
| C           | -0.9613 | -1.432  | -0.6898 | C           | -0.8966 | -1.6322 | -0.551  |   |         |         |         |  |
| C           | -1.1576 | -0.0944 | -1.464  | C           | -1.2885 | -0.4705 | -1.4778 |   |         |         |         |  |
| C           | -2.4663 | 0.5221  | -0.9579 | C           | -2.7671 | -0.1677 | -1.1965 |   |         |         |         |  |
| C           | 0.5178  | -1.7597 | -0.2461 | C           | 0.6501  | -1.7788 | -0.3287 |   |         |         |         |  |
| C           | 0.392   | -0.4373 | -3.2349 | C           | 0.3177  | 0.224   | -3.1426 |   |         |         |         |  |
| C           | -1.1046 | -0.2625 | -2.9944 | C           | -0.8692 | -0.7263 | -2.9469 |   |         |         |         |  |
| C           | -4.4315 | -0.2601 | 0.4346  | C           | -4.2158 | -0.4391 | 0.8762  |   |         |         |         |  |
| C           | 0.7297  | -1.9249 | 1.2538  | C           | 0.9896  | -2.2982 | 1.0616  |   |         |         |         |  |
| C           | 1.227   | -0.9696 | 2.0599  | C           | 1.6181  | -1.6562 | 2.0614  |   |         |         |         |  |
| C           | 1.5954  | 0.4033  | 1.613   | C           | 2.2717  | -0.3142 | 2.1566  |   |         |         |         |  |
| C           | 2.8445  | 0.5008  | 0.7221  | C           | 2.7618  | 0.4529  | 0.9211  |   |         |         |         |  |
| C           | 1.645   | -1.0042 | -1.0839 | C           | 1.5594  | -0.7229 | -1.0797 |   |         |         |         |  |
| C           | 1.0365  | 0.136   | -1.9461 | C           | 0.7618  | 0.4758  | -1.6953 |   |         |         |         |  |
| C           | 0.4067  | -3.2882 | 1.8212  | C           | 0.5946  | -3.7482 | 1.3003  |   |         |         |         |  |
| C           | 0.9508  | 0.2272  | -4.4894 | C           | -0.0569 | 1.5456  | -3.8261 |   |         |         |         |  |
| O           | -1.5813 | 0.9386  | -3.6355 | O           | -1.9313 | -0.4822 | -3.8784 |   |         |         |         |  |
| H           | -1.2371 | -2.2355 | -1.392  | H           | -1.2412 | -2.567  | -1.0227 |   |         |         |         |  |
| O           | -0.0337 | 0.7443  | -1.204  | O           | -0.491  | 0.6414  | -1.0295 |   |         |         |         |  |
| C           | -2.2897 | 0.7742  | -4.7841 | C           | -1.7815 | -1.0561 | -5.1037 |   |         |         |         |  |
| C           | -2.7197 | 2.1078  | -5.3129 | C           | -2.9553 | -0.7225 | -5.9718 |   |         |         |         |  |
| O           | -2.54   | -0.2956 | -5.3196 | O           | -0.8306 | -1.7392 | -5.4551 |   |         |         |         |  |
| C           | 3.0054  | -0.6145 | -0.366  | C           | 2.9351  | -0.3217 | -0.4143 |   |         |         |         |  |
| C           | 4.0413  | -0.1368 | -1.437  | C           | 3.7332  | 0.6053  | -1.3903 |   |         |         |         |  |
| C           | 3.6946  | -1.875  | 0.2372  | C           | 3.8625  | -1.5554 | -0.2464 |   |         |         |         |  |
| O           | 2.7943  | 1.7902  | 0.0567  | O           | 1.9026  | 1.5929  | 0.6924  |   |         |         |         |  |
| H           | 1.9908  | -1.7576 | -1.8102 | H           | 1.9102  | -1.276  | -1.9677 |   |         |         |         |  |
| C           | 3.1728  | 2.8755  | 0.7817  | C           | 2.1557  | 2.7159  | 1.4142  |   |         |         |         |  |
| C           | 3.0289  | 4.1139  | -0.0483 | C           | 1.3024  | 3.8435  | 0.9195  |   |         |         |         |  |
| O           | 3.5731  | 2.8605  | 1.9365  | O           | 2.9985  | 2.8246  | 2.2935  |   |         |         |         |  |
| H           | 0.6511  | -2.7952 | -0.6063 | H           | 0.8803  | -2.6704 | -0.9412 |   |         |         |         |  |
| O           | -1.8004 | -0.6836 | 1.5318  | O           | -1.4105 | -0.34   | 1.5061  |   |         |         |         |  |
| C           | -2.2626 | -1.1717 | 2.7099  | C           | -1.55   | -0.5325 | 2.8417  |   |         |         |         |  |
| C           | -1.2274 | 1.3769  | 5.9951  | C           | -0.6289 | 3.0114  | 5.0548  |   |         |         |         |  |
| C           | -1.0899 | 1.8548  | 4.6923  | C           | -0.9521 | 3.1154  | 3.702   |   |         |         |         |  |
| C           | -1.4275 | 1.0406  | 3.6092  | C           | -1.2422 | 1.9681  | 2.9607  |   |         |         |         |  |
| C           | -1.8963 | -0.262  | 3.8273  | C           | -1.2173 | 0.7115  | 3.5784  |   |         |         |         |  |
| C           | -2.0397 | -0.7322 | 5.1394  | C           | -0.9059 | 0.6144  | 4.9407  |   |         |         |         |  |
| C           | -1.704  | 0.0858  | 6.2199  | C           | -0.6059 | 1.7627  | 5.6748  |   |         |         |         |  |

|   |         |         |         |   |         |         |         |  |  |  |  |
|---|---------|---------|---------|---|---------|---------|---------|--|--|--|--|
| O | -2.8877 | -2.2091 | 2.8651  | O | -1.9058 | -1.5602 | 3.3973  |  |  |  |  |
| H | -3.5873 | -1.3006 | -1.2338 | H | -3.5794 | -1.9997 | -0.433  |  |  |  |  |
| H | -2.4236 | -2.4604 | 0.5787  | H | -1.9447 | -2.3539 | 1.2298  |  |  |  |  |
| H | -2.2638 | 1.269   | -0.1798 | H | -2.9065 | 0.8918  | -0.9513 |  |  |  |  |
| H | -3.0527 | 1.026   | -1.7317 | H | -3.4265 | -0.4006 | -2.038  |  |  |  |  |
| H | 0.6031  | -1.5099 | -3.3268 | H | 1.1103  | -0.2422 | -3.7385 |  |  |  |  |
| H | -1.6836 | -1.1358 | -3.3146 | H | -0.5438 | -1.7701 | -3.0466 |  |  |  |  |
| H | -4.1602 | 0.4466  | 1.2252  | H | -3.8932 | 0.5302  | 1.2693  |  |  |  |  |
| H | -5.1807 | 0.2293  | -0.1968 | H | -5.1419 | -0.2751 | 0.315   |  |  |  |  |
| H | -4.9014 | -1.1326 | 0.8992  | H | -4.4473 | -1.0928 | 1.7232  |  |  |  |  |
| H | 1.3709  | -1.1755 | 3.1193  | H | 1.7282  | -2.2054 | 3.0002  |  |  |  |  |
| H | 1.7542  | 1.0185  | 2.5085  | H | 3.1708  | -0.4901 | 2.7662  |  |  |  |  |
| H | 0.7341  | 0.8772  | 1.1306  | H | 1.632   | 0.3249  | 2.7748  |  |  |  |  |
| H | 3.742   | 0.4747  | 1.356   | H | 3.7584  | 0.843   | 1.1773  |  |  |  |  |
| H | 1.7482  | 0.9241  | -2.1877 | H | 1.2953  | 1.4227  | -1.6337 |  |  |  |  |
| H | -0.6131 | -3.5892 | 1.5684  | H | -0.4507 | -3.9343 | 1.044   |  |  |  |  |
| H | 1.0949  | -4.0362 | 1.4137  | H | 1.2151  | -4.4049 | 0.6807  |  |  |  |  |
| H | 0.4958  | -3.3136 | 2.9125  | H | 0.7294  | -4.0556 | 2.3429  |  |  |  |  |
| H | 0.4613  | -0.1627 | -5.3874 | H | -0.3398 | 1.3824  | -4.8706 |  |  |  |  |
| H | 2.0233  | 0.0232  | -4.5803 | H | 0.797   | 2.2317  | -3.8257 |  |  |  |  |
| H | 0.8231  | 1.3145  | -4.4691 | H | -0.8902 | 2.0458  | -3.3211 |  |  |  |  |
| H | -3.3469 | 2.6143  | -4.5749 | H | -3.8741 | -1.0951 | -5.5121 |  |  |  |  |
| H | -1.8409 | 2.712   | -5.5516 | H | -3.0098 | 0.3588  | -6.1205 |  |  |  |  |
| H | -3.3041 | 1.9644  | -6.2262 | H | -2.8338 | -1.2039 | -6.9463 |  |  |  |  |
| H | 4.1947  | -0.9062 | -2.203  | H | 3.7743  | 0.1757  | -2.3978 |  |  |  |  |
| H | 5.0146  | 0.0643  | -0.9728 | H | 4.7676  | 0.7334  | -1.0479 |  |  |  |  |
| H | 3.7543  | 0.7807  | -1.9552 | H | 3.3174  | 1.6131  | -1.4701 |  |  |  |  |
| H | 3.2014  | -2.2976 | 1.1097  | H | 3.4454  | -2.361  | 0.3551  |  |  |  |  |
| H | 3.7698  | -2.6729 | -0.5111 | H | 4.1039  | -1.9928 | -1.2229 |  |  |  |  |
| H | 4.716   | -1.64   | 0.5621  | H | 4.8102  | -1.2676 | 0.2245  |  |  |  |  |
| H | 1.985   | 4.2406  | -0.3463 | H | 0.2976  | 3.4856  | 0.681   |  |  |  |  |
| H | 3.3307  | 4.9835  | 0.5424  | H | 1.2152  | 4.6022  | 1.7019  |  |  |  |  |
| H | 3.675   | 4.0479  | -0.9272 | H | 1.7608  | 4.284   | 0.031   |  |  |  |  |
| H | -0.9632 | 2.0126  | 6.8368  | H | -0.3966 | 3.9058  | 5.6281  |  |  |  |  |
| H | -0.7178 | 2.8617  | 4.5186  | H | -0.9786 | 4.0919  | 3.2255  |  |  |  |  |
| H | -1.3166 | 1.4316  | 2.6007  | H | -1.4939 | 2.0622  | 1.9066  |  |  |  |  |
| H | -2.4103 | -1.7387 | 5.3235  | H | -0.8941 | -0.3566 | 5.4317  |  |  |  |  |
| H | -1.8137 | -0.2847 | 7.2361  | H | -0.3576 | 1.6833  | 6.7302  |  |  |  |  |

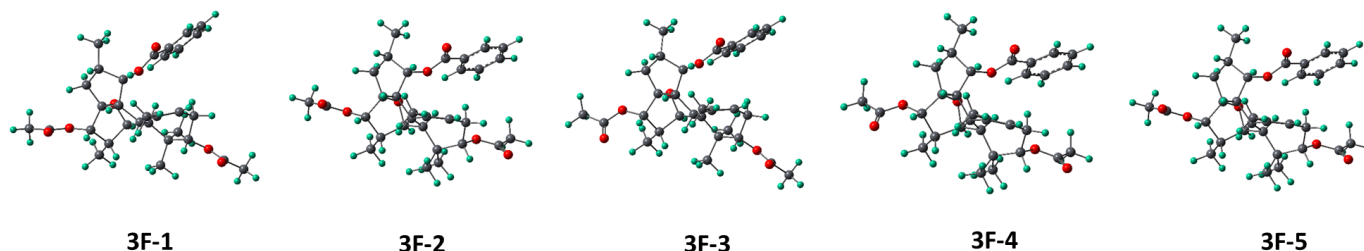

Figure S19. Key conformers of isomer **3F**.

Table S21. Important thermodynamic parameters and Boltzmann distributions of the optimized isomer **3F** at B3LYP/6-31G\* level in the gas phase.

| Conformations | Energy (a.u) | $\Delta G$ (kcal/mol) | %      | Number of imaginary frequencies |
|---------------|--------------|-----------------------|--------|---------------------------------|
| <b>3F-1</b>   | -1731.979819 | 0.960236313           | 6.90%  | 0                               |
| <b>3F-2</b>   | -1731.981021 | 0.206216278           | 24.67% | 0                               |
| <b>3F-3</b>   | -1731.980051 | 0.814950566           | 8.82%  | 0                               |
| <b>3F-4</b>   | -1731.98135  | 0                     | 34.94% | 0                               |
| <b>3F-5</b>   | -1731.981021 | 0.206210003           | 24.67% | 0                               |

Table S22. Optimized Z-matrixes of isomer **3F** in the gas phase (Å) at B3LYP/6-31G\* level.

| 3F-1 | 3F-2 | 3F-3 |
|------|------|------|
|------|------|------|

|   |         |         |         |   |         |         |         |   |         |         |         |
|---|---------|---------|---------|---|---------|---------|---------|---|---------|---------|---------|
| C | -3.5882 | 0.9405  | -0.4486 | C | -3.501  | 0.4664  | -0.6127 | C | -3.5515 | 1.2535  | -0.4133 |
| C | -2.5943 | -0.1423 | 0.0181  | C | -2.4112 | -0.5851 | -0.3153 | C | -2.6528 | 0.1034  | 0.087   |
| C | -1.6051 | -0.2434 | -1.1716 | C | -1.4098 | -0.3413 | -1.4626 | C | -1.6935 | -0.1271 | -1.1079 |
| C | -1.4187 | 1.2368  | -1.5581 | C | -1.3422 | 1.1983  | -1.5347 | C | -1.3735 | 1.3174  | -1.5385 |
| C | -2.8046 | 1.8636  | -1.4049 | C | -2.7802 | 1.658   | -1.2865 | C | -2.6915 | 2.0783  | -1.3933 |
| C | -0.2658 | -1.0283 | -0.9378 | C | -0.0149 | -1.014  | -1.3652 | C | -0.431  | -1.0284 | -0.8708 |
| C | 0.7986  | 1.3636  | -2.4726 | C | 0.8799  | 1.707   | -2.3371 | C | 0.8183  | 1.2083  | -2.5074 |
| C | -0.6855 | 1.4394  | -2.8874 | C | -0.6051 | 1.729   | -2.7732 | C | -0.6617 | 1.4126  | -2.8897 |
| C | -4.2854 | 1.7118  | 0.6633  | C | -4.3437 | 0.8995  | 0.5783  | C | -4.1784 | 2.1121  | 0.6761  |
| C | -0.5802 | -2.4019 | -0.3273 | C | -0.098  | -2.5227 | -1.143  | C | -0.8615 | -2.3449 | -0.208  |
| C | -0.0196 | -2.9387 | 0.7726  | C | 0.4976  | -3.2144 | -0.1553 | C | -0.3312 | -2.8961 | 0.8998  |
| C | 1.1908  | -2.4354 | 1.4921  | C | 1.3013  | -2.681  | 0.9827  | C | 0.9375  | -2.4876 | 1.5782  |
| C | 2.2989  | -2.1335 | 0.4735  | C | 2.5637  | -1.8452 | 0.6857  | C | 2.0464  | -2.3284 | 0.5282  |
| C | 0.8113  | -0.0967 | -0.2629 | C | 0.9849  | -0.1756 | -0.4938 | C | 0.7441  | -0.1834 | -0.2489 |
| C | 0.7656  | 1.3193  | -0.9299 | C | 0.8298  | 1.3362  | -0.8451 | C | 0.8187  | 1.209   | -0.9613 |
| C | -1.5723 | -3.2555 | -1.0956 | C | -0.863  | -3.2906 | -2.201  | C | -1.9438 | -3.1261 | -0.9299 |
| C | 1.646   | 2.5353  | -2.9752 | C | 1.6167  | 3.0299  | -2.5552 | C | 1.7658  | 2.2807  | -3.0504 |
| O | -0.9747 | 2.7352  | -3.4475 | O | -1.0066 | 3.0792  | -3.0762 | O | -0.8932 | 2.7145  | -3.461  |
| H | -2.1433 | -0.7307 | -1.999  | H | -1.8917 | -0.6916 | -2.3885 | H | -2.2879 | -0.5853 | -1.9134 |
| O | -0.5306 | 1.8564  | -0.6107 | O | -0.5163 | 1.6827  | -0.4587 | O | -0.4118 | 1.8768  | -0.6297 |
| C | -1.86   | 2.7687  | -4.4785 | C | -1.8842 | 3.236   | -4.1025 | C | -0.9639 | 2.7731  | -4.8177 |
| C | -2.0384 | 4.1777  | -4.9532 | C | -2.1863 | 4.6895  | -4.2992 | C | -1.2175 | 4.1828  | -5.2551 |
| O | -2.4394 | 1.8006  | -4.9492 | O | -2.3704 | 2.3315  | -4.7658 | O | -0.8336 | 1.825   | -5.5782 |
| C | 2.2794  | -0.6598 | -0.0554 | C | 2.4575  | -0.748  | -0.4479 | C | 2.1558  | -0.8781 | -0.0521 |
| C | 3.1208  | -0.6422 | -1.3487 | C | 2.9221  | -1.377  | -1.7858 | C | 2.9624  | -0.9845 | -1.3632 |
| C | 3.017   | 0.2539  | 0.9685  | C | 3.4952  | 0.3678  | -0.1483 | C | 3.0024  | -0.0067 | 0.9231  |
| O | 3.5909  | -2.4201 | 1.0664  | O | 2.8858  | -1.173  | 1.9382  | O | 3.3182  | -2.7186 | 1.1053  |
| H | 0.4392  | 0.0704  | 0.7548  | H | 0.622   | -0.2219 | 0.5397  | H | 0.4116  | 0.0505  | 0.7697  |
| C | 3.9943  | -3.7199 | 1.0574  | C | 3.607   | -1.8799 | 2.8493  | C | 3.5932  | -4.0511 | 1.1375  |
| C | 5.3441  | -3.8364 | 1.6964  | C | 3.8241  | -1.0533 | 4.0791  | C | 4.9413  | -4.2761 | 1.7503  |
| O | 3.3621  | -4.6621 | 0.6037  | O | 4.014   | -3.0233 | 2.7055  | O | 2.8606  | -4.9427 | 0.7351  |
| H | 0.1344  | -1.2602 | -1.935  | H | 0.3851  | -0.9415 | -2.3874 | H | -0.0758 | -1.3293 | -1.8667 |
| O | -1.9216 | 0.2566  | 1.2173  | O | -1.8036 | -0.3517 | 0.9594  | O | -1.929  | 0.4838  | 1.2618  |
| C | -2.2906 | -0.3494 | 2.3699  | C | -2.1972 | -1.1358 | 1.9898  | C | -2.3321 | -0.0455 | 2.4405  |
| C | 0.1402  | 0.9666  | 5.6447  | C | -0.1324 | -0.0973 | 5.6003  | C | 0.2685  | 1.1464  | 5.6315  |
| C | -0.6906 | -0.1455 | 5.7777  | C | -0.9002 | -1.2592 | 5.529   | C | -0.6655 | 0.1277  | 5.8179  |
| C | -1.4804 | -0.5595 | 4.7034  | C | -1.5697 | -1.5825 | 4.3472  | C | -1.5092 | -0.2464 | 4.7703  |
| C | -1.4396 | 0.137   | 3.4885  | C | -1.4705 | -0.7452 | 3.2283  | C | -1.4197 | 0.3965  | 3.5288  |
| C | -0.6071 | 1.2586  | 3.3639  | C | -0.6987 | 0.4231  | 3.308   | C | -0.4828 | 1.4247  | 3.3503  |
| C | 0.1818  | 1.6691  | 4.4406  | C | -0.0314 | 0.7434  | 4.4922  | C | 0.3597  | 1.7953  | 4.4004  |
| O | -3.169  | -1.186  | 2.5026  | O | -3.0147 | -2.0404 | 1.9412  | O | -3.2823 | -0.791  | 2.6148  |
| H | -4.3634 | 0.4413  | -1.047  | H | -4.1788 | 0.0345  | -1.3627 | H | -4.3668 | 0.8059  | -0.9989 |
| H | -3.1246 | -1.0886 | 0.1615  | H | -2.8235 | -1.5983 | -0.3791 | H | -3.2639 | -0.7852 | 0.2716  |
| H | -2.7438 | 2.8898  | -1.0256 | H | -2.8118 | 2.5587  | -0.6632 | H | -2.5291 | 3.1006  | -1.0336 |
| H | -3.3431 | 1.8866  | -2.3577 | H | -3.3047 | 1.8755  | -2.222  | H | -3.2224 | 2.1366  | -2.351  |
| H | 1.2395  | 0.4511  | -2.8817 | H | 1.424   | 0.9484  | -2.9051 | H | 1.1616  | 0.2472  | -2.8985 |
| H | -0.9126 | 0.6442  | -3.6069 | H | -0.745  | 1.0772  | -3.6434 | H | -1.0214 | 0.6257  | -3.563  |
| H | -4.829  | 1.031   | 1.3259  | H | -4.8435 | 0.0389  | 1.0338  | H | -4.7772 | 1.4987  | 1.3568  |
| H | -3.5751 | 2.2864  | 1.2667  | H | -3.74   | 1.3947  | 1.3457  | H | -3.4207 | 2.64    | 1.2643  |
| H | -5.0092 | 2.4178  | 0.2425  | H | -5.1184 | 1.6057  | 0.2608  | H | -4.8397 | 2.8657  | 0.2354  |
| H | -0.3595 | -3.9171 | 1.1141  | H | 0.3652  | -4.2967 | -0.1272 | H | -0.7539 | -3.8266 | 1.2807  |
| H | 0.951   | -1.5866 | 2.1389  | H | 0.6318  | -2.1355 | 1.6577  | H | 0.7942  | -1.5984 | 2.1988  |
| H | 1.5238  | -3.226  | 2.1762  | H | 1.6135  | -3.542  | 1.5903  | H | 1.2085  | -3.2831 | 2.2837  |
| H | 2.1896  | -2.7953 | -0.3985 | H | 3.3913  | -2.5193 | 0.4263  | H | 1.8545  | -3.0053 | -0.3175 |
| H | 1.4999  | 1.9921  | -0.4837 | H | 1.4906  | 1.9545  | -0.2328 | H | 1.6237  | 1.8211  | -0.551  |
| H | -1.5924 | -4.291  | -0.7377 | H | -0.7571 | -4.375  | -2.0871 | H | -2.0557 | -4.1418 | -0.5342 |
| H | -2.5903 | -2.8683 | -1.0177 | H | -1.9314 | -3.0613 | -2.1536 | H | -2.919  | -2.6412 | -0.8515 |
| H | -1.2933 | -3.2914 | -2.1542 | H | -0.4929 | -3.0334 | -3.1991 | H | -1.6887 | -3.2253 | -1.9905 |
| H | 1.2967  | 3.4921  | -2.5722 | H | 1.1769  | 3.8427  | -1.9673 | H | 1.4926  | 3.2812  | -2.6982 |
| H | 1.6229  | 2.5902  | -4.0687 | H | 1.5979  | 3.3157  | -3.6121 | H | 1.7661  | 2.2845  | -4.1448 |
| H | 2.691   | 2.4158  | -2.6721 | H | 2.6661  | 2.9382  | -2.2565 | H | 2.7936  | 2.0899  | -2.7252 |
| H | -2.4633 | 4.787   | -4.1516 | H | -2.6711 | 5.0906  | -3.4056 | H | -2.1583 | 4.5397  | -4.8284 |
| H | -1.0772 | 4.5841  | -5.278  | H | -1.2636 | 5.2343  | -4.5144 | H | -0.3867 | 4.8215  | -4.9448 |
| H | -2.7254 | 4.1893  | -5.8042 | H | -2.8648 | 4.807   | -5.1489 | H | -1.2958 | 4.2155  | -6.3455 |
| H | 3.3052  | 0.3751  | -1.7022 | H | 2.8413  | -0.6691 | -2.6149 | H | 3.2348  | -0.002  | -1.7563 |
| H | 4.1067  | -1.0945 | -1.1876 | H | 3.9771  | -1.6732 | -1.7271 | H | 3.9038  | -1.5248 | -1.2079 |

|             |         |         |         |             |         |         |         |   |         |         |        |
|-------------|---------|---------|---------|-------------|---------|---------|---------|---|---------|---------|--------|
| H           | 2.6329  | -1.2087 | -2.1484 | H           | 2.3714  | -2.2796 | -2.0567 | H | 2.4022  | -1.5266 | -2.132 |
| H           | 2.5009  | 0.2644  | 1.9345  | H           | 3.2332  | 0.9466  | 0.7439  | H | 2.5125  | 0.0872  | 1.8981 |
| H           | 4.047   | -0.0753 | 1.1453  | H           | 4.492   | -0.0584 | 0.0185  | H | 3.9995  | -0.4289 | 1.091  |
| H           | 3.0959  | 1.2875  | 0.6213  | H           | 3.5868  | 1.0658  | -0.9868 | H | 3.1736  | 1.0017  | 0.5372 |
| H           | 5.6665  | -4.8813 | 1.6747  | H           | 4.2761  | -0.0953 | 3.8091  | H | 5.1606  | -5.3476 | 1.7605 |
| H           | 6.0699  | -3.237  | 1.1412  | H           | 2.8727  | -0.8987 | 4.5925  | H | 5.7072  | -3.7702 | 1.1571 |
| H           | 5.2903  | -3.5094 | 2.7378  | H           | 4.5086  | -1.5777 | 4.7519  | H | 4.9462  | -3.9091 | 2.7797 |
| H           | 0.7536  | 1.289   | 6.4828  | H           | 0.3847  | 0.1554  | 6.5229  | H | 0.924   | 1.4378  | 6.4487 |
| H           | -0.7254 | -0.6904 | 6.7179  | H           | -0.9813 | -1.9129 | 6.394   | H | -0.7385 | -0.3754 | 6.779  |
| H           | -2.1259 | -1.4287 | 4.8148  | H           | -2.1682 | -2.4904 | 4.3003  | H | -2.235  | -1.0428 | 4.9235 |
| H           | -0.5659 | 1.8223  | 2.4339  | H           | -0.6125 | 1.0945  | 2.4558  | H | -0.401  | 1.946   | 2.3985 |
| H           | 0.826   | 2.539   | 4.3397  | H           | 0.5634  | 1.6517  | 4.5493  | H | 1.0848  | 2.5928  | 4.2576 |
| <b>3F-4</b> |         |         |         | <b>3F-5</b> |         |         |         |   |         |         |        |
| C           | -3.5303 | 0.4427  | -0.7628 | C           | -3.4457 | 0.8959  | -0.2611 |   |         |         |        |
| C           | -2.4626 | -0.5985 | -0.361  | C           | -2.4995 | -0.3201 | -0.0691 |   |         |         |        |
| C           | -1.4108 | -0.4195 | -1.4736 | C           | -1.5736 | -0.2851 | -1.3059 |   |         |         |        |
| C           | -1.3263 | 1.1139  | -1.6146 | C           | -1.4164 | 1.219   | -1.5822 |   |         |         |        |
| C           | -2.7694 | 1.5961  | -1.4582 | C           | -2.8222 | 1.764   | -1.3762 |   |         |         |        |
| C           | -0.0266 | -1.0952 | -1.29   | C           | -0.2089 | -1.0234 | -1.2313 |   |         |         |        |
| C           | 0.9193  | 1.572   | -2.3714 | C           | 0.7869  | 1.5608  | -2.5133 |   |         |         |        |
| C           | -0.5508 | 1.5792  | -2.854  | C           | -0.7077 | 1.5315  | -2.9093 |   |         |         |        |
| C           | -4.4248 | 0.9371  | 0.3648  | C           | -3.7309 | 1.7169  | 0.9925  |   |         |         |        |
| C           | -0.1306 | -2.5896 | -0.993  | C           | -0.3482 | -2.4972 | -0.8569 |   |         |         |        |
| C           | 0.4227  | -3.2321 | 0.0509  | C           | 0.2973  | -3.1297 | 0.1389  |   |         |         |        |
| C           | 1.189   | -2.644  | 1.1877  | C           | 1.2236  | -2.5454 | 1.1514  |   |         |         |        |
| C           | 2.4692  | -1.8347 | 0.8926  | C           | 2.4939  | -1.8117 | 0.6793  |   |         |         |        |
| C           | 0.9483  | -0.2187 | -0.4287 | C           | 0.8913  | -0.1599 | -0.5154 |   |         |         |        |
| C           | 0.8183  | 1.2738  | -0.8631 | C           | 0.78    | 1.3233  | -0.9945 |   |         |         |        |
| C           | -0.861  | -3.4073 | -2.0379 | C           | -1.2434 | -3.3131 | -1.7663 |   |         |         |        |
| C           | 1.6757  | 2.8786  | -2.6169 | C           | 1.4994  | 2.8697  | -2.8616 |   |         |         |        |
| O           | -0.9862 | 2.9031  | -3.218  | O           | -1.1096 | 2.8109  | -3.4336 |   |         |         |        |
| H           | -1.8576 | -0.8113 | -2.4006 | H           | -2.148  | -0.7082 | -2.1445 |   |         |         |        |
| O           | -0.5369 | 1.6468  | -0.5374 | O           | -0.5317 | 1.7764  | -0.5969 |   |         |         |        |
| C           | -0.9756 | 3.1966  | -4.5457 | C           | -2.0516 | 2.7919  | -4.4143 |   |         |         |        |
| C           | -1.4606 | 4.5968  | -4.7627 | C           | -2.3584 | 4.1887  | -4.8579 |   |         |         |        |
| O           | -0.6185 | 2.4415  | -5.4381 | O           | -2.5895 | 1.7896  | -4.8624 |   |         |         |        |
| C           | 2.4132  | -0.7974 | -0.2996 | C           | 2.34    | -0.8006 | -0.5269 |   |         |         |        |
| C           | 2.9194  | -1.4978 | -1.5859 | C           | 2.673   | -1.5628 | -1.8353 |   |         |         |        |
| C           | 3.4491  | 0.3254  | -0.0211 | C           | 3.4422  | 0.286   | -0.401  |   |         |         |        |
| O           | 2.7532  | -1.1001 | 2.1191  | O           | 2.976   | -1.0722 | 1.8402  |   |         |         |        |
| H           | 0.5476  | -0.2087 | 0.592   | H           | 0.6087  | -0.0921 | 0.5419  |   |         |         |        |
| C           | 3.4332  | -1.7642 | 3.092   | C           | 3.7218  | -1.7652 | 2.7439  |   |         |         |        |
| C           | 3.6163  | -0.8747 | 4.2829  | C           | 4.1431  | -0.8613 | 3.8612  |   |         |         |        |
| O           | 3.8319  | -2.9175 | 3.024   | O           | 4.0198  | -2.9482 | 2.6642  |   |         |         |        |
| H           | 0.4107  | -1.0784 | -2.2993 | H           | 0.1232  | -1.07   | -2.2792 |   |         |         |        |
| O           | -1.9076 | -0.3022 | 0.9242  | O           | -1.7549 | -0.216  | 1.1489  |   |         |         |        |
| C           | -2.3491 | -1.0308 | 1.9757  | C           | -2.2172 | -0.9251 | 2.2074  |   |         |         |        |
| C           | -0.41   | 0.1633  | 5.6078  | C           | 0.3304  | -0.4006 | 5.6055  |   |         |         |        |
| C           | -1.1895 | -0.9922 | 5.5642  | C           | -0.4917 | -1.5224 | 5.5017  |   |         |         |        |
| C           | -1.8179 | -1.3664 | 4.3748  | C           | -1.3283 | -1.674  | 4.3948  |   |         |         |        |
| C           | -1.6657 | -0.5866 | 3.2207  | C           | -1.3344 | -0.7075 | 3.3811  |   |         |         |        |
| C           | -0.8826 | 0.5756  | 3.2726  | C           | -0.5099 | 0.4206  | 3.492   |   |         |         |        |
| C           | -0.2564 | 0.9469  | 4.4644  | C           | 0.3194  | 0.5716  | 4.6048  |   |         |         |        |
| O           | -3.174  | -1.9292 | 1.939   | O           | -3.1905 | -1.6608 | 2.2228  |   |         |         |        |
| H           | -4.1747 | -0.022  | -1.5225 | H           | -4.4075 | 0.5235  | -0.6388 |   |         |         |        |
| H           | -2.8797 | -1.6113 | -0.3903 | H           | -3.0776 | -1.2517 | -0.0896 |   |         |         |        |
| H           | -2.8216 | 2.5253  | -0.8797 | H           | -2.8203 | 2.8288  | -1.1196 |   |         |         |        |
| H           | -3.2369 | 1.7767  | -2.4333 | H           | -3.4247 | 1.6318  | -2.2818 |   |         |         |        |
| H           | 1.4768  | 0.7838  | -2.8833 | H           | 1.3244  | 0.7625  | -3.0293 |   |         |         |        |
| H           | -0.7093 | 0.8791  | -3.6825 | H           | -0.8731 | 0.7443  | -3.6546 |   |         |         |        |
| H           | -4.9513 | 0.102   | 0.8373  | H           | -4.1982 | 1.1017  | 1.7673  |   |         |         |        |
| H           | -3.8541 | 1.4659  | 1.1352  | H           | -2.8172 | 2.1599  | 1.4028  |   |         |         |        |
| H           | -5.1787 | 1.6308  | -0.0224 | H           | -4.4206 | 2.5367  | 0.7637  |   |         |         |        |
| H           | 0.2816  | -4.3107 | 0.1305  | H           | 0.1126  | -4.1953 | 0.2809  |   |         |         |        |
| H           | 0.5004  | -2.0581 | 1.8075  | H           | 0.6468  | -1.9028 | 1.8226  |   |         |         |        |
| H           | 1.4709  | -3.4733 | 1.8517  | H           | 1.5404  | -3.366  | 1.8099  |   |         |         |        |

|   |         |         |         |   |         |         |         |  |  |  |  |
|---|---------|---------|---------|---|---------|---------|---------|--|--|--|--|
| H | 3.299   | -2.5276 | 0.6984  | H | 3.2554  | -2.5534 | 0.4024  |  |  |  |  |
| H | 1.4629  | 1.9179  | -0.2603 | H | 1.4954  | 1.9582  | -0.4657 |  |  |  |  |
| H | -0.7695 | -4.4848 | -1.8628 | H | -1.1733 | -4.3877 | -1.5652 |  |  |  |  |
| H | -1.9283 | -3.1684 | -2.0445 | H | -2.2913 | -3.0263 | -1.6404 |  |  |  |  |
| H | -0.4504 | -3.2061 | -3.033  | H | -0.9608 | -3.1621 | -2.8134 |  |  |  |  |
| H | 1.1987  | 3.7263  | -2.1136 | H | 1.05    | 3.7263  | -2.3479 |  |  |  |  |
| H | 1.7396  | 3.099   | -3.6869 | H | 1.467   | 3.0553  | -3.9404 |  |  |  |  |
| H | 2.7006  | 2.8055  | -2.2384 | H | 2.553   | 2.8232  | -2.567  |  |  |  |  |
| H | -2.4785 | 4.7002  | -4.3785 | H | -2.8437 | 4.7355  | -4.0459 |  |  |  |  |
| H | -0.7883 | 5.302   | -4.2677 | H | -1.4381 | 4.692   | -5.1653 |  |  |  |  |
| H | -1.4697 | 4.8154  | -5.8343 | H | -3.035  | 4.1555  | -5.7167 |  |  |  |  |
| H | 2.8714  | -0.8335 | -2.4529 | H | 2.5658  | -0.9265 | -2.7169 |  |  |  |  |
| H | 3.9698  | -1.7956 | -1.4754 | H | 3.7143  | -1.9088 | -1.8252 |  |  |  |  |
| H | 2.3723  | -2.4106 | -1.8284 | H | 2.0607  | -2.454  | -1.9852 |  |  |  |  |
| H | 3.1603  | 0.952   | 0.8295  | H | 3.2731  | 0.9459  | 0.4568  |  |  |  |  |
| H | 4.4355  | -0.0983 | 0.2038  | H | 4.4312  | -0.1708 | -0.2738 |  |  |  |  |
| H | 3.5769  | 0.9777  | -0.8911 | H | 3.4962  | 0.9094  | -1.2994 |  |  |  |  |
| H | 4.0974  | 0.0589  | 3.9799  | H | 3.2644  | -0.4495 | 4.358   |  |  |  |  |
| H | 2.6481  | -0.6757 | 4.7473  | H | 4.7162  | -1.4359 | 4.5927  |  |  |  |  |
| H | 4.2623  | -1.373  | 5.0113  | H | 4.7753  | -0.0617 | 3.471   |  |  |  |  |
| H | 0.0753  | 0.4556  | 6.5359  | H | 0.9795  | -0.2831 | 6.4701  |  |  |  |  |
| H | -1.3114 | -1.6014 | 6.4565  | H | -0.4826 | -2.2795 | 6.282   |  |  |  |  |
| H | -2.4255 | -2.269  | 4.3496  | H | -1.9668 | -2.552  | 4.3178  |  |  |  |  |
| H | -0.7552 | 1.2029  | 2.3924  | H | -0.5066 | 1.1849  | 2.7176  |  |  |  |  |
| H | 0.3476  | 1.8502  | 4.4996  | H | 0.9578  | 1.4476  | 4.6894  |  |  |  |  |

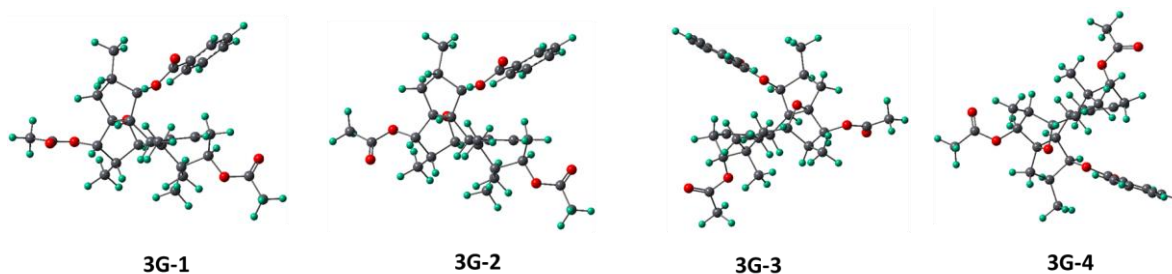

Figure S20. Key conformers of isomer **3G**.

Table S23. Important thermodynamic parameters and Boltzmann distributions of the optimized isomer **3G** at B3LYP/6-31G\* level in the gas phase.

| Conformations | Energy (a.u) | $\Delta G$ (kcal/mol) | %      | Number of imaginary frequencies |
|---------------|--------------|-----------------------|--------|---------------------------------|
| <b>3G-1</b>   | -1731.980373 | 0.139048368           | 41.06% | 0                               |
| <b>3G-2</b>   | -1731.980595 | 0                     | 51.93% | 0                               |
| <b>3G-3</b>   | -1731.977906 | 1.687035272           | 3.01%  | 0                               |
| <b>3G-4</b>   | -1731.978176 | 1.517728714           | 4.00%  | 0                               |

Table S24. Optimized Z-matrixes of isomer **3G** in the gas phase (Å) at B3LYP/6-31G\* level.

| <b>3G-1</b> |         |         | <b>3G-2</b> |   |         | <b>3G-3</b> |         |   |         |         |         |
|-------------|---------|---------|-------------|---|---------|-------------|---------|---|---------|---------|---------|
| C           | -2.7971 | -1.7775 | -1.6026     | C | -2.2058 | -2.2206     | -2.0326 | C | -3.3083 | -1.07   | -0.9121 |
| C           | -1.6401 | -1.8493 | -0.5848     | C | -1.2073 | -2.1332     | -0.8583 | C | -2.016  | -1.3877 | -0.1333 |
| C           | -0.4593 | -1.2944 | -1.4069     | C | -0.054  | -1.325      | -1.485  | C | -0.8996 | -0.9994 | -1.1375 |
| C           | -1.09   | -0.0915 | -2.1412     | C | -0.7995 | -0.2194     | -2.2621 | C | -1.4522 | 0.3084  | -1.7361 |
| C           | -2.5043 | -0.5535 | -2.5007     | C | -2.0351 | -0.9131     | -2.8399 | C | -2.9552 | 0.0723  | -1.8869 |
| C           | 0.8498  | -0.9417 | -0.6509     | C | 1.0537  | -0.7795     | -0.545  | C | 0.5687  | -0.8963 | -0.5888 |
| C           | 0.731   | 1.4543  | -2.4919     | C | 0.7282  | 1.6448      | -2.331  | C | 0.4907  | 1.5843  | -2.3377 |
| C           | -0.2076 | 0.4901  | -3.2548     | C | 0.0907  | 0.5643      | -3.2347 | C | -0.6798 | 0.7988  | -2.9639 |
| C           | -4.1987 | -1.7373 | -1.0114     | C | -3.656  | -2.4773     | -1.6494 | C | -4.5257 | -0.7494 | -0.0562 |
| C           | 1.3731  | -2.091  | 0.2089      | C | 1.6638  | -1.857      | 0.3496  | C | 0.9004  | -2.1673 | 0.2009  |
| C           | 1.6549  | -2.0372 | 1.5233      | C | 1.7536  | -1.8194     | 1.6915  | C | 1.4003  | -2.2259 | 1.4483  |
| C           | 1.4582  | -0.8864 | 2.4577      | C | 1.2238  | -0.7712     | 2.6171  | C | 1.9861  | -1.0979 | 2.2406  |
| C           | 2.2029  | 0.4249  | 2.1386      | C | 1.749   | 0.6668      | 2.4376  | C | 2.966   | -0.2486 | 1.4107  |
| C           | 0.8054  | 0.4988  | -0.0323     | C | 0.6603  | 0.5961      | 0.0964  | C | 0.8182  | 0.5128  | 0.0645  |

|             |         |         |         |   |         |         |         |   |         |         |         |
|-------------|---------|---------|---------|---|---------|---------|---------|---|---------|---------|---------|
| C           | 0.1666  | 1.4805  | -1.0611 | C | -0.0095 | 1.496   | -0.9862 | C | 0.1659  | 1.6226  | -0.829  |
| C           | 1.6681  | -3.3737 | -0.5404 | C | 2.2916  | -3.0242 | -0.3831 | C | 0.7039  | -3.4771 | -0.5391 |
| C           | 0.805   | 2.8621  | -3.0851 | C | 0.6083  | 3.0741  | -2.8614 | C | 0.6656  | 2.9963  | -2.9027 |
| O           | -0.9968 | 1.2292  | -4.2074 | O | -0.7299 | 1.1494  | -4.264  | O | -1.4886 | 1.6781  | -3.7695 |
| H           | -0.2162 | -2.0522 | -2.1679 | H | 0.4274  | -1.9818 | -2.2263 | H | -0.9089 | -1.7542 | -1.9389 |
| O           | -1.1905 | 1.0175  | -1.2267 | O | -1.2244 | 0.8032  | -1.3439 | O | -1.2505 | 1.3729  | -0.7895 |
| C           | -1.2569 | 0.6121  | -5.3904 | C | -0.1666 | 1.2541  | -5.4972 | C | -2.0139 | 1.1504  | -4.9068 |
| C           | -2.0682 | 1.5132  | -6.2694 | C | -1.1417 | 1.8692  | -6.4531 | C | -2.8104 | 2.1907  | -5.6322 |
| O           | -0.8973 | -0.5152 | -5.6978 | O | 0.9681  | 0.9083  | -5.7924 | O | -1.8735 | -0.0033 | -5.2857 |
| C           | 2.1557  | 0.954   | 0.6494  | C | 1.7997  | 1.2537  | 0.9702  | C | 2.2811  | 0.8738  | 0.5564  |
| C           | 2.2427  | 2.5007  | 0.7519  | C | 1.5818  | 2.7831  | 1.1237  | C | 2.1768  | 2.1165  | 1.4942  |
| C           | 3.4203  | 0.5267  | -0.1369 | C | 3.2135  | 1.1042  | 0.3549  | C | 3.2257  | 1.2725  | -0.596  |
| O           | 3.5841  | 0.3158  | 2.564   | O | 3.0591  | 0.786   | 3.0458  | O | 3.7709  | -1.0959 | 0.5489  |
| H           | 0.0618  | 0.4795  | 0.7732  | H | -0.1665 | 0.4011  | 0.7899  | H | 0.2137  | 0.5101  | 0.9794  |
| C           | 3.8473  | 0.5473  | 3.8779  | C | 3.1015  | 0.9936  | 4.3891  | C | 4.7845  | -1.7841 | 1.1387  |
| C           | 5.3142  | 0.3901  | 4.1373  | C | 4.5255  | 1.0906  | 4.8432  | C | 5.4726  | -2.6424 | 0.1224  |
| O           | 3.0229  | 0.8393  | 4.7317  | O | 2.1332  | 1.0876  | 5.129   | O | 5.1008  | -1.721  | 2.3178  |
| H           | 1.6036  | -0.874  | -1.449  | H | 1.8803  | -0.5356 | -1.2286 | H | 1.2311  | -0.935  | -1.4651 |
| O           | -1.9048 | -1.0293 | 0.5576  | O | -1.7758 | -1.4392 | 0.2561  | O | -1.9301 | -0.6067 | 1.0634  |
| C           | -2.3495 | -1.6503 | 1.6754  | C | -2.2403 | -2.1915 | 1.2814  | C | -2.1469 | -1.2412 | 2.239   |
| C           | -3.0082 | 1.1623  | 4.8404  | C | -3.8296 | 0.2746  | 4.4046  | C | -1.5386 | 1.4127  | 5.5483  |
| C           | -2.7958 | 1.6327  | 3.5448  | C | -3.5359 | 0.8476  | 3.1675  | C | -1.6365 | 1.9407  | 4.2612  |
| C           | -2.5854 | 0.7314  | 2.4992  | C | -3.0231 | 0.059   | 2.1356  | C | -1.8402 | 1.0923  | 3.1709  |
| C           | -2.5833 | -0.6485 | 2.7497  | C | -2.7985 | -1.3099 | 2.3415  | C | -1.943  | -0.2926 | 3.3663  |
| C           | -2.8048 | -1.1135 | 4.0526  | C | -3.1028 | -1.8796 | 3.5847  | C | -1.8502 | -0.8146 | 4.663   |
| C           | -3.0147 | -0.2088 | 5.0949  | C | -3.6154 | -1.0875 | 4.6136  | C | -1.6467 | 0.0371  | 5.7504  |
| O           | -2.5298 | -2.849  | 1.8154  | O | -2.2091 | -3.4089 | 1.3586  | O | -2.4446 | -2.4152 | 2.3878  |
| H           | -2.7289 | -2.6699 | -2.2411 | H | -1.8797 | -3.0456 | -2.6817 | H | -3.5509 | -1.9509 | -1.5231 |
| H           | -1.4452 | -2.8872 | -0.2921 | H | -0.86   | -3.1318 | -0.5701 | H | -1.9793 | -2.4577 | 0.0923  |
| H           | -3.2373 | 0.2469  | -2.3494 | H | -2.9222 | -0.2736 | -2.7705 | H | -3.5295 | 0.9817  | -1.6777 |
| H           | -2.5742 | -0.8831 | -3.5418 | H | -1.8894 | -1.1777 | -3.8938 | H | -3.2105 | -0.2639 | -2.8969 |
| H           | 1.7487  | 1.059   | -2.5012 | H | 1.7946  | 1.4428  | -2.2131 | H | 1.4231  | 1.0464  | -2.5256 |
| H           | 0.3836  | -0.2852 | -3.7557 | H | 0.8469  | -0.0982 | -3.6718 | H | -0.2921 | -0.0328 | -3.5638 |
| H           | -4.3597 | -0.8401 | -0.4051 | H | -4.0681 | -1.6627 | -1.0452 | H | -4.3777 | 0.1587  | 0.5374  |
| H           | -4.9492 | -1.7356 | -1.8091 | H | -4.277  | -2.5697 | -2.5469 | H | -5.4062 | -0.5919 | -0.6882 |
| H           | -4.381  | -2.6156 | -0.3843 | H | -3.7486 | -3.4089 | -1.0826 | H | -4.7479 | -1.5752 | 0.627   |
| H           | 2.0432  | -2.9333 | 2.0085  | H | 2.2353  | -2.6528 | 2.2039  | H | 1.5486  | -3.2037 | 1.9079  |
| H           | 0.3842  | -0.6945 | 2.5446  | H | 0.1309  | -0.7807 | 2.5575  | H | 1.2111  | -0.5005 | 2.7293  |
| H           | 1.7603  | -1.2312 | 3.4552  | H | 1.449   | -1.1053 | 3.6383  | H | 2.5557  | -1.5577 | 3.0591  |
| H           | 1.7156  | 1.1885  | 2.7622  | H | 1.0521  | 1.298   | 3.0079  | H | 3.6572  | 0.243   | 2.1093  |
| H           | 0.0967  | 2.4912  | -0.6514 | H | -0.3192 | 2.4554  | -0.5643 | H | 0.3178  | 2.615   | -0.401  |
| H           | 0.7449  | -3.8363 | -0.9007 | H | 1.5282  | -3.6276 | -0.8824 | H | -0.3527 | -3.7123 | -0.6821 |
| H           | 2.3171  | -3.1713 | -1.3989 | H | 3.0006  | -2.6632 | -1.1355 | H | 1.1854  | -3.4265 | -1.5217 |
| H           | 2.1805  | -4.1131 | 0.0847  | H | 2.8445  | -3.6895 | 0.289   | H | 1.1545  | -4.3237 | -0.0091 |
| H           | -0.1666 | 3.3672  | -3.0581 | H | -0.437  | 3.3762  | -2.9866 | H | -0.2153 | 3.6205  | -2.7169 |
| H           | 1.1506  | 2.8289  | -4.1236 | H | 1.1193  | 3.1789  | -3.8234 | H | 0.8459  | 2.9631  | -3.9823 |
| H           | 1.5125  | 3.4783  | -2.5205 | H | 1.0746  | 3.7804  | -2.1665 | H | 1.5225  | 3.4957  | -2.4396 |
| H           | -3.034  | 1.7159  | -5.8    | H | -2.0389 | 1.2484  | -6.518  | H | -3.6526 | 2.5098  | -5.0131 |
| H           | -1.5241 | 2.4439  | -6.4492 | H | -1.3953 | 2.8798  | -6.1235 | H | -2.1706 | 3.0412  | -5.8806 |
| H           | -2.2418 | 1.0215  | -7.2308 | H | -0.6874 | 1.9286  | -7.4462 | H | -3.1998 | 1.7661  | -6.5619 |
| H           | 2.3381  | 2.9671  | -0.2339 | H | 1.7178  | 3.309   | 0.1732  | H | 1.8292  | 3.0099  | 0.9681  |
| H           | 3.1179  | 2.8104  | 1.3357  | H | 2.2989  | 3.2164  | 1.8314  | H | 3.1546  | 2.3768  | 1.9174  |
| H           | 1.3583  | 2.9181  | 1.2463  | H | 0.5775  | 3.0073  | 1.5007  | H | 1.4947  | 1.9299  | 2.3307  |
| H           | 3.5811  | -0.5538 | -0.1267 | H | 3.5713  | 0.072   | 0.3605  | H | 3.2814  | 0.4939  | -1.3633 |
| H           | 3.3783  | 0.8533  | -1.1784 | H | 3.2465  | 1.4687  | -0.6745 | H | 2.9158  | 2.2053  | -1.0736 |
| H           | 4.3255  | 0.9807  | 0.2849  | H | 3.9546  | 1.6943  | 0.9079  | H | 4.244   | 1.4431  | -0.2255 |
| H           | 5.876   | 1.109   | 3.5356  | H | 5.0176  | 1.9286  | 4.3431  | H | 5.9015  | -2.0151 | -0.663  |
| H           | 5.5185  | 0.5854  | 5.1939  | H | 4.5508  | 1.2658  | 5.9225  | H | 6.2807  | -3.1991 | 0.6053  |
| H           | 5.6238  | -0.632  | 3.9053  | H | 5.047   | 0.1543  | 4.6295  | H | 4.7619  | -3.3571 | -0.3004 |
| H           | -3.1701 | 1.8657  | 5.6537  | H | -4.2272 | 0.8907  | 5.2076  | H | -1.3816 | 2.0749  | 6.3964  |
| H           | -2.7948 | 2.7019  | 3.3477  | H | -3.7069 | 1.909   | 3.0054  | H | -1.5574 | 3.0138  | 4.1055  |
| H           | -2.4266 | 1.1171  | 1.4941  | H | -2.8048 | 0.523   | 1.1758  | H | -1.9192 | 1.5224  | 2.1743  |
| H           | -2.8092 | -2.1818 | 4.2601  | H | -2.9365 | -2.9412 | 3.7568  | H | -1.9326 | -1.8871 | 4.8289  |
| H           | -3.1814 | -0.5741 | 6.1052  | H | -3.8458 | -1.5329 | 5.5782  | H | -1.5735 | -0.3734 | 6.7545  |
| <b>3G-4</b> |         |         |         |   |         |         |         |   |         |         |         |
| C           | -3.5275 | -0.65   | -0.6572 |   |         |         |         |   |         |         |         |



|   |         |         |         |  |  |  |  |  |  |  |  |
|---|---------|---------|---------|--|--|--|--|--|--|--|--|
| C | -2.1984 | -1.2066 | -0.1057 |  |  |  |  |  |  |  |  |
| C | -1.1627 | -0.7222 | -1.1522 |  |  |  |  |  |  |  |  |
| C | -1.6418 | 0.7165  | -1.4248 |  |  |  |  |  |  |  |  |
| C | -3.1685 | 0.6358  | -1.4301 |  |  |  |  |  |  |  |  |
| C | 0.3599  | -0.8429 | -0.7882 |  |  |  |  |  |  |  |  |
| C | 0.3336  | 1.9236  | -2.0508 |  |  |  |  |  |  |  |  |
| C | -0.977  | 1.3653  | -2.6405 |  |  |  |  |  |  |  |  |
| C | -4.6184 | -0.4214 | 0.3795  |  |  |  |  |  |  |  |  |
| C | 0.6456  | -2.2618 | -0.2843 |  |  |  |  |  |  |  |  |
| C | 1.2734  | -2.5924 | 0.8585  |  |  |  |  |  |  |  |  |
| C | 2.0579  | -1.6829 | 1.7533  |  |  |  |  |  |  |  |  |
| C | 3.0215  | -0.7769 | 0.9648  |  |  |  |  |  |  |  |  |
| C | 0.826   | 0.3938  | 0.0637  |  |  |  |  |  |  |  |  |
| C | 0.1946  | 1.7005  | -0.527  |  |  |  |  |  |  |  |  |
| C | 0.2364  | -3.3898 | -1.2125 |  |  |  |  |  |  |  |  |
| C | 0.5884  | 3.4005  | -2.3615 |  |  |  |  |  |  |  |  |
| O | -1.8257 | 2.4126  | -3.148  |  |  |  |  |  |  |  |  |
| H | -1.3364 | -1.3053 | -2.0698 |  |  |  |  |  |  |  |  |
| O | -1.2253 | 1.5623  | -0.3411 |  |  |  |  |  |  |  |  |
| C | -1.7936 | 2.6157  | -4.4922 |  |  |  |  |  |  |  |  |
| C | -2.7306 | 3.7236  | -4.8632 |  |  |  |  |  |  |  |  |
| O | -1.1019 | 1.9982  | -5.2886 |  |  |  |  |  |  |  |  |
| C | 2.3649  | 0.5365  | 0.4142  |  |  |  |  |  |  |  |  |
| C | 2.4997  | 1.5892  | 1.5578  |  |  |  |  |  |  |  |  |
| C | 3.2067  | 1.0614  | -0.767  |  |  |  |  |  |  |  |  |
| O | 3.633   | -1.5124 | -0.1276 |  |  |  |  |  |  |  |  |
| H | 0.3322  | 0.2683  | 1.035   |  |  |  |  |  |  |  |  |
| C | 4.63    | -2.3779 | 0.1975  |  |  |  |  |  |  |  |  |
| C | 5.1097  | -3.0835 | -1.0335 |  |  |  |  |  |  |  |  |
| O | 5.0797  | -2.5622 | 1.3191  |  |  |  |  |  |  |  |  |
| H | 0.9117  | -0.77   | -1.7361 |  |  |  |  |  |  |  |  |
| O | -1.9105 | -0.6709 | 1.19    |  |  |  |  |  |  |  |  |
| C | -2.0602 | -1.4955 | 2.2526  |  |  |  |  |  |  |  |  |
| C | -0.828  | 0.4323  | 5.8763  |  |  |  |  |  |  |  |  |
| C | -1.0046 | 1.1977  | 4.7239  |  |  |  |  |  |  |  |  |
| C | -1.4111 | 0.5883  | 3.5351  |  |  |  |  |  |  |  |  |
| C | -1.6392 | -0.7949 | 3.4952  |  |  |  |  |  |  |  |  |
| C | -1.4657 | -1.5559 | 4.6586  |  |  |  |  |  |  |  |  |
| C | -1.0594 | -0.9427 | 5.8453  |  |  |  |  |  |  |  |  |
| O | -2.4569 | -2.6492 | 2.2269  |  |  |  |  |  |  |  |  |
| H | -3.9091 | -1.372  | -1.3929 |  |  |  |  |  |  |  |  |
| H | -2.2431 | -2.2994 | -0.0792 |  |  |  |  |  |  |  |  |
| H | -3.6205 | 1.525   | -0.9764 |  |  |  |  |  |  |  |  |
| H | -3.5566 | 0.5423  | -2.4514 |  |  |  |  |  |  |  |  |
| H | 1.1774  | 1.3589  | -2.4547 |  |  |  |  |  |  |  |  |
| H | -0.7877 | 0.6123  | -3.4145 |  |  |  |  |  |  |  |  |
| H | -4.3289 | 0.3373  | 1.114   |  |  |  |  |  |  |  |  |
| H | -5.5395 | -0.0794 | -0.1043 |  |  |  |  |  |  |  |  |
| H | -4.8458 | -1.3491 | 0.9141  |  |  |  |  |  |  |  |  |
| H | 1.3724  | -3.6476 | 1.1158  |  |  |  |  |  |  |  |  |
| H | 1.4086  | -1.1255 | 2.4347  |  |  |  |  |  |  |  |  |
| H | 2.6649  | -2.3317 | 2.3986  |  |  |  |  |  |  |  |  |
| H | 3.8336  | -0.4815 | 1.6434  |  |  |  |  |  |  |  |  |
| H | 0.4968  | 2.5789  | 0.046   |  |  |  |  |  |  |  |  |
| H | -0.8479 | -3.5076 | -1.2615 |  |  |  |  |  |  |  |  |
| H | 0.6112  | -3.1956 | -2.2234 |  |  |  |  |  |  |  |  |
| H | 0.6524  | -4.3544 | -0.9006 |  |  |  |  |  |  |  |  |
| H | -0.2162 | 4.0404  | -1.9835 |  |  |  |  |  |  |  |  |
| H | 0.685   | 3.5623  | -3.4395 |  |  |  |  |  |  |  |  |
| H | 1.52    | 3.739   | -1.8966 |  |  |  |  |  |  |  |  |
| H | -3.7487 | 3.4646  | -4.5616 |  |  |  |  |  |  |  |  |
| H | -2.4118 | 4.6533  | -4.3854 |  |  |  |  |  |  |  |  |
| H | -2.7145 | 3.8641  | -5.9478 |  |  |  |  |  |  |  |  |
| H | 2.1918  | 2.5904  | 1.2438  |  |  |  |  |  |  |  |  |
| H | 3.5411  | 1.6842  | 1.8885  |  |  |  |  |  |  |  |  |
| H | 1.9006  | 1.3095  | 2.4311  |  |  |  |  |  |  |  |  |

|   |         |         |         |  |  |  |  |  |  |  |
|---|---------|---------|---------|--|--|--|--|--|--|--|
| H | 3.0911  | 0.4358  | -1.6576 |  |  |  |  |  |  |  |
| H | 2.9431  | 2.0885  | -1.0315 |  |  |  |  |  |  |  |
| H | 4.2732  | 1.0763  | -0.5108 |  |  |  |  |  |  |  |
| H | 5.5097  | -2.3567 | -1.745  |  |  |  |  |  |  |  |
| H | 5.906   | -3.7828 | -0.7635 |  |  |  |  |  |  |  |
| H | 4.2874  | -3.648  | -1.4805 |  |  |  |  |  |  |  |
| H | -0.5128 | 0.9086  | 6.8016  |  |  |  |  |  |  |  |
| H | -0.8288 | 2.2703  | 4.7506  |  |  |  |  |  |  |  |
| H | -1.5485 | 1.2023  | 2.6471  |  |  |  |  |  |  |  |
| H | -1.6431 | -2.6295 | 4.6423  |  |  |  |  |  |  |  |
| H | -0.9243 | -1.5382 | 6.7448  |  |  |  |  |  |  |  |

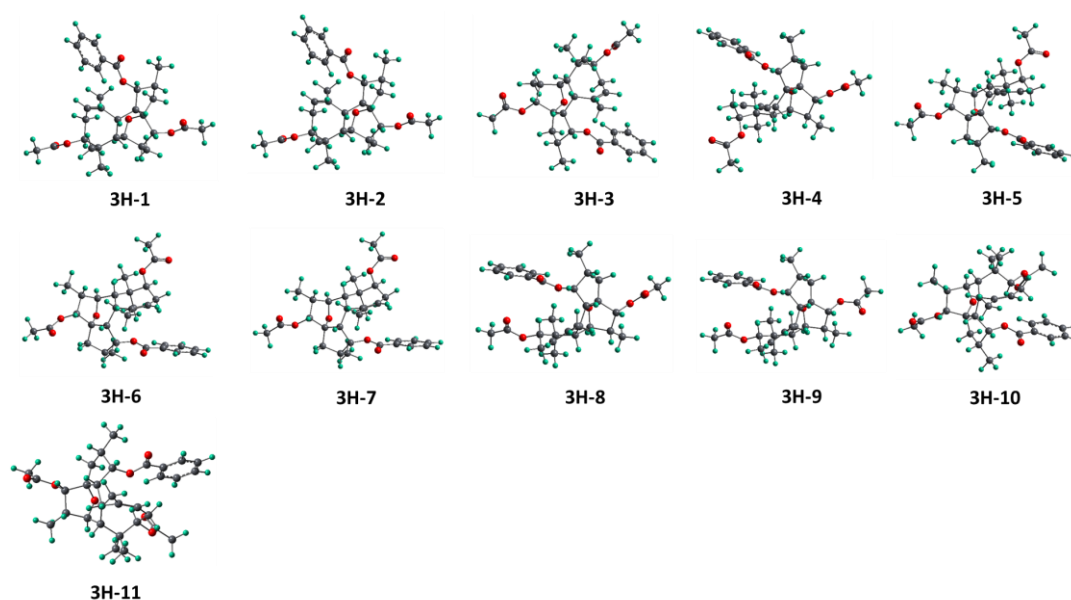

**Figure S21.** Key conformers of isomer **3H**.

**Table S25.** Important thermodynamic parameters and Boltzmann distributions of the optimized isomer **3H** at B3LYP/6-31G\* level in the gas phase.

| Conformations | Energy (a.u) | $\Delta G(\text{kcal/mol})$ | %      | Number of imaginary frequencies |
|---------------|--------------|-----------------------------|--------|---------------------------------|
| <b>3H-1</b>   | -1731.969699 | 0.576235913                 | 12.49% | 0                               |
| <b>3H-2</b>   | -1731.969699 | 0.576348864                 | 12.49% | 0                               |
| <b>3H-3</b>   | -1731.968529 | 1.310226055                 | 3.62%  | 0                               |
| <b>3H-4</b>   | -1731.970144 | 0.296771222                 | 20.03% | 0                               |
| <b>3H-5</b>   | -1731.970617 | 0                           | 33.06% | 0                               |
| <b>3H-6</b>   | -1731.967526 | 1.939875015                 | 1.25%  | 0                               |
| <b>3H-7</b>   | -1731.967514 | 1.946934423                 | 1.23%  | 0                               |
| <b>3H-8</b>   | -1731.968353 | 1.420628916                 | 3.00%  | 0                               |
| <b>3H-9</b>   | -1731.968832 | 1.120400153                 | 4.98%  | 0                               |
| <b>3H-10</b>  | -1731.968606 | 1.262015007                 | 3.92%  | 0                               |
| <b>3H-11</b>  | -1731.968606 | 1.262021282                 | 3.92%  | 0                               |

**Table S26.** Optimized Z-matrixes of isomer **3H** in the gas phase ( $\text{\AA}$ ) at B3LYP/6-31G\* level.

| <b>3H-1</b> |         |         | <b>3H-2</b> |         |         | <b>3H-3</b> |         |         |         |
|-------------|---------|---------|-------------|---------|---------|-------------|---------|---------|---------|
| C           | -3.5587 | -0.1899 | C           | -3.5845 | 0.0347  | C           | -3.6015 | -0.5877 | -0.094  |
| C           | -2.3561 | -0.8848 | C           | -2.4084 | -0.7299 | C           | -2.3094 | -1.2793 | 0.3665  |
| C           | -1.4185 | -1.0985 | C           | -1.5175 | -0.9995 | C           | -1.4042 | -1.1019 | -0.8777 |
| C           | -1.5712 | 0.2269  | C           | -1.6096 | 0.334   | C           | -1.7074 | 0.3543  | -1.311  |
| C           | -2.9048 | 0.8562  | C           | -2.8936 | 1.04    | C           | -3.1037 | 0.6974  | -0.7668 |

|   |         |         |         |   |         |         |         |   |         |         |         |
|---|---------|---------|---------|---|---------|---------|---------|---|---------|---------|---------|
| C | 0.0785  | -1.5291 | -0.4699 | C | -0.0441 | -1.52   | -0.4206 | C | 0.1315  | -1.426  | -0.7783 |
| C | 0.0427  | 0.7621  | -3.1988 | C | -0.0072 | 0.7781  | -3.1438 | C | -0.1831 | 1.4669  | -2.8294 |
| C | -1.2972 | 0.0394  | -2.9964 | C | -1.3818 | 0.1342  | -2.9113 | C | -1.4517 | 0.5992  | -2.8246 |
| C | -4.5658 | 0.4243  | 0.8236  | C | -4.528  | 0.7076  | 0.9891  | C | -4.6234 | -0.3127 | 0.9991  |
| C | 0.4844  | -1.8175 | 0.9745  | C | 0.3759  | -1.8392 | 1.0131  | C | 0.601   | -2.037  | 0.541   |
| C | 1.3018  | -1.0502 | 1.7188  | C | 1.2528  | -1.1247 | 1.7418  | C | 1.3607  | -1.4102 | 1.458   |
| C | 1.9153  | 0.2404  | 1.2851  | C | 1.9332  | 0.1273  | 1.2964  | C | 1.8349  | 0.0036  | 1.3727  |
| C | 2.9914  | 0.1041  | 0.1949  | C | 2.9708  | -0.0677 | 0.1808  | C | 2.8909  | 0.2608  | 0.2848  |
| C | 1.0995  | -0.7481 | -1.405  | C | 0.9996  | -0.7974 | -1.3775 | C | 1.0463  | -0.335  | -1.4779 |
| C | 0.6319  | 0.6933  | -1.7869 | C | 0.6096  | 0.6705  | -1.7462 | C | 0.431   | 1.1008  | -1.4753 |
| C | 0.0021  | -3.1348 | 1.5426  | C | -0.1711 | -3.1283 | 1.5871  | C | 0.2632  | -3.4974 | 0.7479  |
| C | -0.109  | 2.2124  | -3.6689 | C | -0.0849 | 2.2362  | -3.6076 | C | -0.4638 | 2.9717  | -2.9113 |
| O | -2.2965 | 0.5607  | -3.879  | O | -2.369  | 0.7144  | -3.7704 | O | -2.5524 | 1.2325  | -3.4884 |
| H | -1.8915 | -1.8945 | -1.2872 | H | -2.0529 | -1.7647 | -1.1876 | H | -1.8227 | -1.7713 | -1.6457 |
| O | -0.4973 | 1.0637  | -0.9947 | O | -0.477  | 1.1047  | -0.9269 | O | -0.7178 | 1.1472  | -0.6239 |
| C | -3.3469 | -0.2715 | -4.121  | C | -3.4717 | -0.0545 | -3.9882 | C | -2.5563 | 1.1307  | -4.8459 |
| C | -4.301  | 0.3695  | -5.0806 | C | -4.4073 | 0.6416  | -4.9272 | C | -3.7515 | 1.836   | -5.4086 |
| O | -3.5024 | -1.3747 | -3.6176 | O | -3.6809 | -1.1465 | -3.4797 | O | -1.7109 | 0.5553  | -5.5156 |
| C | 2.6301  | -0.8172 | -1.0217 | C | 2.533   | -0.9575 | -1.0323 | C | 2.5867  | -0.3465 | -1.1288 |
| C | 3.4799  | -0.3286 | -2.2354 | C | 3.3755  | -0.5118 | -2.2669 | C | 3.3512  | 0.5217  | -2.1752 |
| C | 3.0828  | -2.2893 | -0.814  | C | 2.904   | -2.4538 | -0.8417 | C | 3.1848  | -1.7692 | -1.311  |
| O | 4.2315  | -0.3621 | 0.7821  | O | 4.1709  | -0.6124 | 0.7845  | O | 4.1846  | -0.2161 | 0.7303  |
| H | 1.0643  | -1.3202 | -2.3468 | H | 0.9077  | -1.3636 | -2.319  | H | 1.041   | -0.6475 | -2.5353 |
| C | 5.0157  | 0.5718  | 1.3839  | C | 5.3256  | 0.089   | 0.6397  | C | 4.8905  | 0.6029  | 1.5551  |
| C | 6.2417  | -0.08   | 1.9457  | C | 6.4426  | -0.6269 | 1.3355  | C | 6.1891  | -0.0454 | 1.9249  |
| O | 4.7715  | 1.767   | 1.4625  | O | 5.4564  | 1.1417  | 0.0324  | O | 4.5332  | 1.7049  | 1.9452  |
| H | 0.1148  | -2.5392 | -0.9148 | H | -0.0789 | -2.5283 | -0.8697 | H | 0.2508  | -2.2782 | -1.4706 |
| O | -1.7736 | -0.001  | 1.4894  | O | -1.75   | 0.1202  | 1.5815  | O | -1.7852 | -0.5892 | 1.5076  |
| C | -1.9849 | -0.2897 | 2.7954  | C | -1.9373 | -0.156  | 2.8936  | C | -1.9213 | -1.1969 | 2.7105  |
| C | -0.1009 | 2.5839  | 5.3573  | C | 0.1534  | 2.6324  | 5.3884  | C | -0.2555 | 1.1796  | 5.864   |
| C | -0.1768 | 2.8381  | 3.9883  | C | 0.0383  | 2.8929  | 4.0232  | C | -0.4097 | 1.7407  | 4.5966  |
| C | -0.7918 | 1.9161  | 3.1386  | C | -0.6417 | 1.9973  | 3.1951  | C | -0.9557 | 0.9836  | 3.558   |
| C | -1.3276 | 0.7291  | 3.6571  | C | -1.2057 | 0.8313  | 3.7316  | C | -1.343  | -0.3446 | 3.7834  |
| C | -1.2528 | 0.484   | 5.0347  | C | -1.091  | 0.5798  | 5.1053  | C | -1.191  | -0.8991 | 5.0612  |
| C | -0.6397 | 1.4094  | 5.8816  | C | -0.4114 | 1.4782  | 5.9303  | C | -0.6473 | -0.1381 | 6.0979  |
| O | -2.6133 | -1.2401 | 3.2345  | O | -2.5988 | -1.0731 | 3.3541  | O | -2.435  | -2.2854 | 2.9164  |
| H | -4.0846 | -0.9217 | -0.7655 | H | -4.1689 | -0.6649 | -0.6096 | H | -4.0781 | -1.2168 | -0.8588 |
| H | -2.6608 | -1.8414 | 0.9573  | H | -2.7579 | -1.6659 | 1.0789  | H | -2.4979 | -2.3382 | 0.5668  |
| H | -2.7279 | 1.791   | -0.4993 | H | -2.6496 | 1.9639  | -0.3846 | H | -3.0436 | 1.5231  | -0.0472 |
| H | -3.5778 | 1.1019  | -1.8703 | H | -3.5717 | 1.3227  | -1.7322 | H | -3.8226 | 0.9916  | -1.5363 |
| H | 0.6704  | 0.2403  | -3.9303 | H | 0.5718  | 0.2229  | -3.8907 | H | 0.4782  | 1.2052  | -3.6631 |
| H | -1.1397 | -1.0212 | -3.235  | H | -1.292  | -0.9334 | -3.154  | H | -1.2582 | -0.3665 | -3.3097 |
| H | -4.9687 | -0.3374 | 1.4986  | H | -4.9569 | -0.0288 | 1.6762  | H | -5.5242 | 0.1412  | 0.5724  |
| H | -4.124  | 1.2205  | 1.4311  | H | -4.0243 | 1.4767  | 1.5832  | H | -4.9178 | -1.2432 | 1.4948  |
| H | -5.4035 | 0.8603  | 0.269   | H | -5.353  | 1.1918  | 0.4559  | H | -4.2384 | 0.3736  | 1.76    |
| H | 1.5621  | -1.3676 | 2.7275  | H | 1.5173  | -1.4619 | 2.7429  | H | 1.6785  | -1.9493 | 2.3492  |
| H | 2.3451  | 0.7168  | 2.1748  | H | 2.4273  | 0.5696  | 2.1715  | H | 2.2384  | 0.2763  | 2.3557  |
| H | 1.125   | 0.9181  | 0.9511  | H | 1.178   | 0.8565  | 0.9905  | H | 0.9745  | 0.6613  | 1.2233  |
| H | 3.1637  | 1.117   | -0.1939 | H | 3.177   | 0.9454  | -0.1867 | H | 2.9555  | 1.3516  | 0.172   |
| H | 1.4091  | 1.4458  | -1.6393 | H | 1.4331  | 1.3753  | -1.6156 | H | 1.1339  | 1.8627  | -1.1322 |
| H | -1.0826 | -3.232  | 1.4736  | H | -1.2608 | -3.1618 | 1.5395  | H | -0.8083 | -3.6817 | 0.6546  |
| H | 0.4526  | -3.9663 | 0.9903  | H | 0.219   | -3.9824 | 1.0234  | H | 0.7784  | -4.1089 | -0.0006 |
| H | 0.2719  | -3.2545 | 2.5974  | H | 0.1122  | -3.2677 | 2.6359  | H | 0.5695  | -3.8575 | 1.7359  |
| H | 0.8647  | 2.7137  | -3.6813 | H | 0.9159  | 2.6799  | -3.6418 | H | 0.4617  | 3.5407  | -2.7711 |
| H | -0.7759 | 2.7885  | -3.0187 | H | -0.7018 | 2.8481  | -2.9411 | H | -1.1785 | 3.299   | -2.1487 |
| H | -0.5112 | 2.251   | -4.6867 | H | -0.5076 | 2.3014  | -4.6156 | H | -0.8666 | 3.2432  | -3.892  |
| H | -4.7232 | 1.2731  | -4.6339 | H | -4.7665 | 1.5679  | -4.472  | H | -4.6666 | 1.3861  | -5.0152 |
| H | -3.785  | 0.6062  | -6.0145 | H | -3.8987 | 0.8486  | -5.8722 | H | -3.7059 | 2.8987  | -5.1578 |
| H | -5.1151 | -0.3267 | -5.3014 | H | -5.2651 | -0.0059 | -5.1301 | H | -3.7535 | 1.7334  | -6.4975 |
| H | 3.2768  | -0.9327 | -3.1272 | H | 3.0916  | -1.0774 | -3.162  | H | 3.1829  | 0.1512  | -3.193  |
| H | 4.5528  | -0.4039 | -2.0225 | H | 4.4457  | -0.6799 | -2.1006 | H | 4.4319  | 0.5023  | -1.991  |
| H | 3.2811  | 0.7157  | -2.4936 | H | 3.2533  | 0.5509  | -2.4963 | H | 3.0453  | 1.5719  | -2.1529 |
| H | 4.1762  | -2.3759 | -0.8135 | H | 3.9906  | -2.6019 | -0.8575 | H | 4.281   | -1.7429 | -1.3343 |
| H | 2.7438  | -2.7233 | 0.127   | H | 2.5538  | -2.8753 | 0.1009  | H | 2.9147  | -2.4632 | -0.5146 |
| H | 2.7152  | -2.9278 | -1.6257 | H | 2.489   | -3.064  | -1.6523 | H | 2.8586  | -2.2099 | -2.2603 |
| H | 5.956   | -0.8222 | 2.6953  | H | 6.2152  | -0.7228 | 2.4002  | H | 5.9978  | -0.9816 | 2.4553  |

|             |         |         |             |   |         |             |         |   |         |         |         |
|-------------|---------|---------|-------------|---|---------|-------------|---------|---|---------|---------|---------|
| H           | 6.8154  | -0.5462 | 1.1408      | H | 6.5904  | -1.6105     | 0.8828  | H | 6.7823  | -0.2265 | 1.0251  |
| H           | 6.8673  | 0.6777  | 2.426       | H | 7.3657  | -0.0503     | 1.2277  | H | 6.7518  | 0.6208  | 2.5851  |
| H           | 0.3788  | 3.3033  | 6.0167      | H | 0.6822  | 3.3316      | 6.0316  | H | 0.1705  | 1.7713  | 6.6707  |
| H           | 0.2442  | 3.7538  | 3.5801      | H | 0.477   | 3.7941      | 3.6018  | H | -1.103  | 2.768   | 4.4149  |
| H           | -0.8419 | 2.132   | 2.0733      | H | -0.7229 | 2.2176      | 2.1326  | H | -1.0684 | 1.4387  | 2.576   |
| H           | -1.6699 | -0.4307 | 5.4514      | H | -1.5295 | -0.3183     | 5.5358  | H | -1.493  | -1.927  | 5.2516  |
| H           | -0.5823 | 1.2132  | 6.9493      | H | -0.3242 | 1.2774      | 6.9951  | H | -0.5289 | -0.5738 | 7.0868  |
| <b>3H-4</b> |         |         | <b>3H-5</b> |   |         | <b>3H-6</b> |         |   |         |         |         |
| C           | -2.8749 | 1.4649  | 0.9199      | C | -3.2651 | 0.6924      | 0.6138  | C | -2.3289 | 2.252   | 0.1708  |
| C           | -1.7656 | 0.4925  | 1.3586      | C | -2.0061 | 0.0013      | 1.1686  | C | -1.8088 | 1.0562  | 1.0023  |
| C           | -1.6488 | -0.4131 | 0.1127      | C | -1.5253 | -0.7877     | -0.0693 | C | -1.6808 | -0.1554 | 0.0331  |
| C           | -1.8235 | 0.5501  | -1.0842     | C | -1.7818 | 0.1685      | -1.2544 | C | -1.9919 | 0.4109  | -1.3639 |
| C           | -2.5104 | 1.8067  | -0.5303     | C | -2.8417 | 1.1736      | -0.7806 | C | -2.8857 | 1.6175  | -1.1046 |
| C           | -0.4699 | -1.4388 | 0.0021      | C | -0.1267 | -1.4928     | -0.0489 | C | -0.4572 | -1.1341 | 0.0897  |
| C           | -1.2903 | -1.3267 | -2.8911     | C | -0.6867 | -1.0203     | -3.015  | C | -1.2661 | -1.3224 | -2.8586 |
| C           | -2.4651 | -0.1256 | -2.307      | C | -2.0823 | -0.5613     | -2.5725 | C | -2.5389 | -0.628  | -2.3564 |
| C           | -3.0426 | 2.7062  | 1.7832      | C | -3.8316 | 1.817       | 1.4673  | C | -1.3057 | 3.3486  | -0.117  |
| C           | -0.1567 | -2.1042 | 1.3369      | C | 0.1728  | -2.1365     | 1.2997  | C | -0.0842 | -1.5553 | 1.5072  |
| C           | 0.9679  | -2.0128 | 2.0623      | C | 1.1432  | -1.8193     | 2.1696  | C | 1.0819  | -1.4003 | 2.1541  |
| C           | 2.2497  | -1.3267 | 1.7415      | C | 2.2492  | -0.8316     | 2.0365  | C | 2.3783  | -0.8115 | 1.7157  |
| C           | 2.7731  | -1.5268 | 0.3181      | C | 2.9762  | -0.8256     | 0.6904  | C | 2.8214  | -1.0576 | 0.2765  |
| C           | 0.6064  | -1.1669 | -1.1317     | C | 0.9803  | -0.9072     | -1.0235 | C | 0.5941  | -0.9978 | -1.0884 |
| C           | -0.0481 | -0.2799 | -2.2364     | C | 0.2684  | -0.1362     | -2.1788 | C | -0.1254 | -0.4162 | -2.3473 |
| C           | -1.2726 | -2.9776 | 1.8897      | C | -0.7556 | -3.2801     | 1.6791  | C | -1.207  | -2.2443 | 2.2703  |
| C           | -1.2011 | -0.9151 | -4.4161     | C | -0.3997 | -0.8995     | -4.51   | C | -1.196  | -1.5193 | -4.3729 |
| O           | -2.9016 | 0.8556  | -3.2695     | O | -2.6395 | 0.3742      | -3.5184 | O | -3.2039 | 0.0191  | -3.4607 |
| H           | -2.5695 | -1.0206 | 0.1463      | H | -2.2672 | -1.5986     | -0.1683 | H | -2.5604 | -0.7722 | 0.2849  |
| O           | -0.5276 | 0.9046  | -1.5813     | O | -0.5647 | 0.8567      | -1.5586 | O | -0.7559 | 0.8132  | -1.9619 |
| C           | -4.2429 | 1.0476  | -3.3789     | C | -3.5969 | -0.1061     | -4.3555 | C | -4.5625 | 0.0433  | -3.4231 |
| C           | -4.5275 | 2.073   | -4.4327     | C | -4.0751 | 0.9854      | -5.2626 | C | -5.0949 | 0.741   | -4.6365 |
| O           | -5.0989 | 0.4832  | -2.7133     | O | -4.0104 | -1.2561     | -4.3792 | O | -5.257  | -0.4235 | -2.5321 |
| C           | 2.0726  | -0.6811 | -0.7842     | C | 2.2335  | -0.1105     | -0.4747 | C | 2.0035  | -0.3325 | -0.8346 |
| C           | 2.1504  | 0.8109  | -0.4236     | C | 1.9068  | 1.3365      | -0.0729 | C | 1.9196  | 1.1721  | -0.5458 |
| C           | 2.9658  | -0.8598 | -2.0588     | C | 3.2921  | -0.0058     | -1.6248 | C | 2.8769  | -0.4773 | -2.1257 |
| O           | 2.7192  | -2.9253 | -0.0585     | O | 3.307   | -2.1748     | 0.2776  | O | 2.8469  | -2.4794 | -0.0049 |
| H           | 0.765   | -2.1516 | -1.6012     | H | 1.4276  | -1.797      | -1.4958 | H | 0.8428  | -2.0354 | -1.3635 |
| C           | 3.6935  | -3.7326 | 0.4381      | C | 4.3778  | -2.756      | 0.8804  | C | 3.9269  | -3.1767 | 0.4374  |
| C           | 3.4623  | -5.142  | -0.013      | C | 4.5501  | -4.1533     | 0.3694  | C | 3.7709  | -4.6256 | 0.0915  |
| O           | 4.6267  | -3.3785 | 1.1439      | O | 5.1035  | -2.2314     | 1.7126  | O | 4.8898  | -2.7079 | 1.0267  |
| H           | -0.9885 | -2.2813 | -0.4916     | H | -0.3588 | -2.4059     | -0.6277 | H | -0.9382 | -2.0722 | -0.244  |
| O           | -0.5647 | 1.2125  | 1.6425      | O | -1.0637 | 0.9792      | 1.6115  | O | -0.6299 | 1.4081  | 1.7239  |
| C           | -0.2719 | 1.3798  | 2.9588      | C | -0.981  | 1.1547      | 2.9564  | C | -0.7393 | 1.4615  | 3.0765  |
| C           | 3.1279  | 3.9186  | 3.5122      | C | 1.5913  | 4.42        | 3.9718  | C | 2.8833  | 2.8301  | 4.8945  |
| C           | 2.3733  | 4.0332  | 2.3445      | C | 0.978   | 4.3982      | 2.7191  | C | 2.5744  | 3.2387  | 3.5971  |
| C           | 1.2602  | 3.2136  | 2.1484      | C | 0.135   | 3.3409      | 2.3719  | C | 1.3951  | 2.8033  | 2.9894  |
| C           | 0.9059  | 2.2681  | 3.1195      | C | -0.0881 | 2.2956      | 3.2775  | C | 0.5256  | 1.9488  | 3.6787  |
| C           | 1.6588  | 2.1672  | 4.2961      | C | 0.5192  | 2.3298      | 4.539   | C | 0.8333  | 1.5541  | 4.9867  |
| C           | 2.7705  | 2.9889  | 4.4887      | C | 1.3608  | 3.389       | 4.8826  | C | 2.0132  | 1.9913  | 5.5907  |
| O           | -0.8662 | 0.8893  | 3.9058      | O | -1.5454 | 0.4931      | 3.8135  | O | -1.7103 | 1.1439  | 3.7452  |
| H           | -3.8296 | 0.9203  | 0.9145      | H | -4.0482 | -0.0689     | 0.4892  | H | -3.1526 | 2.7331  | 0.7144  |
| H           | -2.1032 | -0.0932 | 2.2203      | H | -2.2838 | -0.6899     | 1.9714  | H | -2.6169 | 0.7916  | 1.6979  |
| H           | -1.8313 | 2.6674  | -0.5705     | H | -2.4241 | 2.1869      | -0.7389 | H | -2.8946 | 2.3254  | -1.9399 |
| H           | -3.4178 | 2.0863  | -1.0705     | H | -3.7228 | 1.2066      | -1.43   | H | -3.9148 | 1.2936  | -0.9103 |
| H           | -1.3735 | -1.9757 | -2.5942     | H | -0.5471 | -2.0765     | -2.7589 | H | -1.186  | -2.3213 | -2.4142 |
| H           | -3.283  | -0.8006 | -2.0321     | H | -2.7612 | -1.4052     | -2.4068 | H | -3.2022 | -1.3573 | -1.8775 |
| H           | -3.8807 | 3.3111  | 1.421       | H | -4.0808 | 1.4537      | 2.4693  | H | -1.7421 | 4.1206  | -0.7599 |
| H           | -3.252  | 2.4292  | 2.8213      | H | -3.1293 | 2.6503      | 1.569   | H | -0.992  | 3.8389  | 0.8102  |
| H           | -2.1507 | 3.3403  | 1.7704      | H | -4.7476 | 2.2129      | 1.0159  | H | -0.4138 | 2.966   | -0.6163 |
| H           | 0.9982  | -2.5269 | 3.0245      | H | 1.1799  | -2.3633     | 3.115   | H | 1.1282  | -1.7436 | 3.1899  |
| H           | 2.9967  | -1.755  | 2.4239      | H | 2.9882  | -1.1057     | 2.8019  | H | 3.1407  | -1.2564 | 2.3699  |
| H           | 2.1939  | -0.2714 | 2.0195      | H | 1.9049  | 0.1637      | 2.3284  | H | 2.3941  | 0.2548  | 1.9546  |
| H           | 3.8293  | -1.2192 | 0.3343      | H | 3.9172  | -0.2791     | 0.853   | H | 3.8523  | -0.6787 | 0.2141  |
| H           | 0.6686  | 0.0256  | -2.9995     | H | 0.9758  | 0.3802      | -2.8287 | H | 0.5697  | -0.1999 | -3.1583 |
| H           | -2.1823 | -2.3984 | 2.0672      | H | -1.7932 | -2.9442     | 1.752   | H | -2.0356 | -1.5554 | 2.456   |
| H           | -1.506  | -3.7814 | 1.1832      | H | -0.7004 | -4.0748     | 0.9274  | H | -1.584  | -3.101  | 1.7017  |
| H           | -1.0034 | -3.4529 | 2.8393      | H | -0.495  | -3.7312     | 2.6428  | H | -0.8819 | -2.627  | 3.2441  |

|             |         |         |             |   |         |             |         |   |         |         |         |
|-------------|---------|---------|-------------|---|---------|-------------|---------|---|---------|---------|---------|
| H           | -0.3698 | -1.545  | -4.751      | H | 0.61    | -1.2618     | -4.7324 | H | -0.2804 | -2.0564 | -4.6437 |
| H           | -1.0304 | 0.092   | -4.8112     | H | -0.4611 | 0.1372      | -4.8572 | H | -1.1888 | -0.5646 | -4.9097 |
| H           | -2.1209 | -1.3093 | -4.8602     | H | -1.1037 | -1.5029     | -5.0915 | H | -2.047  | -2.1101 | -4.7274 |
| H           | -5.6094 | 2.1931  | -4.5389     | H | -4.4948 | 1.8024      | -4.6702 | H | -6.1883 | 0.7293  | -4.6109 |
| H           | -4.0952 | 3.0332  | -4.1407     | H | -3.2471 | 1.3428      | -5.8799 | H | -4.7561 | 1.78    | -4.644  |
| H           | -4.1198 | 1.7423  | -5.3914     | H | -4.8574 | 0.5944      | -5.9193 | H | -4.7633 | 0.2209  | -5.5387 |
| H           | 1.9441  | 1.4573  | -1.2829     | H | 1.6552  | 1.9609      | -0.9364 | H | 1.5667  | 1.7364  | -1.4145 |
| H           | 3.1492  | 1.0822  | -0.0621     | H | 2.7605  | 1.8158      | 0.4204  | H | 2.9033  | 1.5796  | -0.2844 |
| H           | 1.437   | 1.0599  | 0.355       | H | 1.0669  | 1.3682      | 0.6129  | H | 1.248   | 1.3824  | 0.0281  |
| H           | 4.0217  | -0.6698 | -1.8303     | H | 4.2347  | 0.4168      | -1.2559 | H | 3.9234  | -0.2134 | -1.93   |
| H           | 2.8947  | -1.8761 | -2.4618     | H | 3.5186  | -0.9876     | -2.0552 | H | 2.8621  | -1.504  | -2.5078 |
| H           | 2.7029  | -0.164  | -2.8604     | H | 2.9687  | 0.6484      | -2.4392 | H | 2.5526  | 0.1905  | -2.9295 |
| H           | 4.2433  | -5.7874 | 0.3989      | H | 3.6568  | -4.742      | 0.5928  | H | 4.6389  | -5.1813 | 0.4575  |
| H           | 2.4933  | -5.4929 | 0.351       | H | 4.7392  | -4.1334     | -0.7068 | H | 2.874   | -5.0262 | 0.5707  |
| H           | 3.5059  | -5.1937 | -1.1037     | H | 5.4065  | -4.6181     | 0.8661  | H | 3.7132  | -4.7432 | -0.9935 |
| H           | 3.994   | 4.5584  | 3.6636      | H | 2.247   | 5.2447      | 4.2408  | H | 3.8021  | 3.1704  | 5.3665  |
| H           | 2.6504  | 4.7624  | 1.5871      | H | 1.1549  | 5.2056      | 2.0127  | H | 3.251   | 3.8986  | 3.0596  |
| H           | 0.6771  | 3.3182  | 1.2362      | H | -0.3413 | 3.3398      | 1.394   | H | 1.163   | 3.1371  | 1.9819  |
| H           | 1.3822  | 1.4463  | 5.063       | H | 0.3399  | 1.53        | 5.255   | H | 0.156   | 0.9027  | 5.5354  |
| H           | 3.356   | 2.9051  | 5.401       | H | 1.8347  | 3.4105      | 5.8609  | H | 2.2522  | 1.6793  | 6.6044  |
| <b>3H-7</b> |         |         | <b>3H-8</b> |   |         | <b>3H-9</b> |         |   |         |         |         |
| C           | -3.1277 | 1.0326  | -0.0122     | C | -2.9838 | 1.0694      | 0.5469  | C | -3.1634 | 0.6898  | -0.3485 |
| C           | -2.3065 | -0.1616 | 0.5296      | C | -1.8075 | 0.2567      | 1.1254  | C | -2.1502 | -0.3245 | 0.223   |
| C           | -1.4207 | -0.6766 | -0.6411     | C | -1.7121 | -0.8835     | 0.0947  | C | -1.4265 | -0.7645 | -1.0632 |
| C           | -1.6345 | 0.3331  | -1.7816     | C | -1.9318 | -0.1949     | -1.2732 | C | -1.2454 | 0.5406  | -1.8708 |
| C           | -3.0197 | 0.9172  | -1.5339     | C | -2.7539 | 1.067       | -0.9748 | C | -2.3848 | 1.4676  | -1.425  |
| C           | 0.0679  | -1.1177 | -0.426      | C | -0.5272 | -1.8888     | 0.1286  | C | -0.1595 | -1.6619 | -0.9971 |
| C           | 0.1062  | -0.1837 | -3.3495     | C | -1.1578 | -1.8603     | -2.8367 | C | 0.4015  | -0.0699 | -3.5193 |
| C           | -1.4172 | -0.2527 | -3.185      | C | -2.4468 | -1.1603     | -2.3561 | C | -1.0878 | 0.3062  | -3.3828 |
| C           | -2.7015 | 2.4066  | 0.5015      | C | -3.1639 | 2.4746      | 1.101   | C | -3.8306 | 1.6124  | 0.6603  |
| C           | 0.266   | -1.9924 | 0.8073      | C | -0.2566 | -2.5483     | 1.4808  | C | -0.2942 | -2.9356 | -0.1629 |
| C           | 1.0523  | -1.7798 | 1.8744      | C | 0.9435  | -2.7982     | 2.031   | C | 0.6259  | -3.4599 | 0.664   |
| C           | 1.9939  | -0.6708 | 2.1953      | C | 2.2905  | -2.3933     | 1.5379  | C | 1.9382  | -2.8842 | 1.0732  |
| C           | 2.8092  | -0.0763 | 1.0506      | C | 2.318   | -0.9677     | 0.9871  | C | 1.8699  | -1.3814 | 1.3438  |
| C           | 1.1712  | -0.1267 | -0.9851     | C | 0.6168  | -1.627      | -0.928  | C | 1.2169  | -0.9083 | -1.1756 |
| C           | 0.5641  | 0.6983  | -2.165      | C | -0.0237 | -1.0191     | -2.216  | C | 1.0028  | 0.2978  | -2.1445 |
| C           | -0.551  | -3.2768 | 0.8009      | C | -1.4763 | -3.1074     | 2.1929  | C | -1.5431 | -3.7601 | -0.4231 |
| C           | 0.5943  | 0.3815  | -4.6829     | C | -1.0158 | -1.9572     | -4.3562 | C | 1.1462  | 0.6361  | -4.6524 |
| O           | -2.0897 | 0.5789  | -4.152      | O | -3.0404 | -0.4381     | -3.4537 | O | -1.3804 | 1.5305  | -4.0861 |
| H           | -1.9493 | -1.5873 | -0.971      | H | -2.6208 | -1.4832     | 0.2747  | H | -2.1838 | -1.3521 | -1.6099 |
| O           | -0.6249 | 1.3388  | -1.6818     | O | -0.6626 | 0.2027      | -1.8136 | O | 0.0122  | 1.1391  | -1.5311 |
| C           | -2.624  | -0.0557 | -5.2292     | C | -4.3974 | -0.4616     | -3.5346 | C | -1.9933 | 1.4042  | -5.2932 |
| C           | -3.2918 | 0.9392  | -6.1277     | C | -4.8506 | 0.3064      | -4.7377 | C | -2.2348 | 2.7579  | -5.8865 |
| O           | -2.5682 | -1.2571 | -5.4474     | O | -5.1473 | -1.0125     | -2.7418 | O | -2.3006 | 0.3492  | -5.8286 |
| C           | 2.0209  | 0.766   | 0.0025      | C | 1.9608  | -0.8683     | -0.5258 | C | 2.1096  | -0.5005 | 0.0818  |
| C           | 1.1932  | 1.8541  | 0.6994      | C | 1.9777  | 0.6363      | -0.9034 | C | 1.9519  | 0.9796  | 0.5194  |
| C           | 3.1267  | 1.5179  | -0.8116     | C | 3.1118  | -1.4885     | -1.3817 | C | 3.6039  | -0.6086 | -0.3619 |
| O           | 3.5455  | -1.119  | 0.3638      | O | 3.645   | -0.4088     | 1.1868  | O | 2.8655  | -1.036  | 2.3452  |
| H           | 1.922   | -0.7799 | -1.458      | H | 0.9483  | -2.6393     | -1.2105 | H | 1.8392  | -1.6286 | -1.7309 |
| C           | 4.695   | -1.5499 | 0.9478      | C | 3.9388  | 0.0454      | 2.4354  | C | 2.5506  | -1.3028 | 3.6418  |
| C           | 5.3025  | -2.6437 | 0.1245      | C | 5.2863  | 0.6985      | 2.4339  | C | 3.6229  | -0.7742 | 4.5436  |
| O           | 5.1763  | -1.1189 | 1.9855      | O | 3.2269  | -0.0635     | 3.4229  | O | 1.5529  | -1.8926 | 4.0296  |
| H           | 0.1582  | -1.8982 | -1.2042     | H | -1.0041 | -2.7611     | -0.3544 | H | -0.2157 | -2.1435 | -1.9904 |
| O           | -1.6161 | 0.1897  | 1.727       | O | -0.6307 | 1.0613      | 1.2088  | O | -1.2973 | 0.2995  | 1.1831  |
| C           | -2.0389 | -0.4112 | 2.8692      | C | -0.3603 | 1.5679      | 2.4439  | C | -1.6368 | 0.0876  | 2.4851  |
| C           | 0.049   | 1.0765  | 6.2937      | C | 2.8567  | 4.3855      | 2.3501  | C | 0.6921  | 2.4796  | 5.159   |
| C           | -0.1147 | 1.9031  | 5.1821      | C | 2.0317  | 4.2514      | 1.2332  | C | 0.4073  | 2.9615  | 3.8813  |
| C           | -0.7955 | 1.4344  | 4.0568      | C | 0.978   | 3.3353      | 1.2482  | C | -0.3509 | 2.1919  | 2.9966  |
| C           | -1.3069 | 0.1307  | 4.0398      | C | 0.7569  | 2.54        | 2.3789  | C | -0.8142 | 0.9296  | 3.3859  |
| C           | -1.1531 | -0.6896 | 5.1645      | C | 1.575   | 2.6927      | 3.5038  | C | -0.5426 | 0.4594  | 4.6755  |
| C           | -0.4717 | -0.2174 | 6.2873      | C | 2.6274  | 3.6096      | 3.486   | C | 0.2153  | 1.2312  | 5.5578  |
| O           | -2.881  | -1.2902 | 2.9645      | O | -0.9414 | 1.297       | 3.4829  | O | -2.502  | -0.6701 | 2.8953  |
| H           | -4.1787 | 0.9051  | 0.2779      | H | -3.9091 | 0.5095      | 0.7451  | H | -3.9553 | 0.1214  | -0.8573 |
| H           | -3.0282 | -0.9659 | 0.7276      | H | -2.0828 | -0.1499     | 2.1035  | H | -2.6828 | -1.1763 | 0.6574  |
| H           | -3.1647 | 1.8854  | -2.0248     | H | -2.2138 | 1.9673      | -1.2921 | H | -1.9888 | 2.4088  | -1.0255 |
| H           | -3.7903 | 0.2256  | -1.897      | H | -3.7275 | 1.0775      | -1.4708 | H | -3.0717 | 1.7149  | -2.2415 |

|              |         |         |         |              |         |         |         |   |         |         |         |
|--------------|---------|---------|---------|--------------|---------|---------|---------|---|---------|---------|---------|
| H            | 0.537   | -1.1879 | -3.2623 | H            | -1.1187 | -2.8882 | -2.4594 | H | 0.5075  | -1.1444 | -3.7049 |
| H            | -1.7879 | -1.2827 | -3.2351 | H            | -3.145  | -1.9018 | -1.952  | H | -1.7457 | -0.5034 | -3.7182 |
| H            | -3.2916 | 3.1951  | 0.0221  | H            | -3.2991 | 2.4485  | 2.1868  | H | -4.5649 | 2.254   | 0.1614  |
| H            | -2.8702 | 2.4865  | 1.5802  | H            | -2.3081 | 3.1181  | 0.8752  | H | -4.3576 | 1.0338  | 1.4254  |
| H            | -1.6476 | 2.6151  | 0.3069  | H            | -4.0517 | 2.9446  | 0.6645  | H | -3.1087 | 2.2666  | 1.1585  |
| H            | 1.0198  | -2.5217 | 2.6753  | H            | 0.9796  | -3.345  | 2.9744  | H | 0.4135  | -4.4198 | 1.1372  |
| H            | 2.7076  | -1.0893 | 2.9181  | H            | 2.6571  | -3.1337 | 0.8207  | H | 2.7018  | -3.1495 | 0.336   |
| H            | 1.464   | 0.1096  | 2.7472  | H            | 2.9816  | -2.4718 | 2.3866  | H | 2.2489  | -3.4071 | 1.9865  |
| H            | 3.5363  | 0.6001  | 1.5238  | H            | 1.6142  | -0.3385 | 1.5439  | H | 0.8892  | -1.1205 | 1.758   |
| H            | 1.2438  | 1.4729  | -2.5195 | H            | 0.7436  | -0.7934 | -2.9623 | H | 1.9289  | 0.8669  | -2.267  |
| H            | -1.6216 | -3.061  | 0.8549  | H            | -2.113  | -2.3067 | 2.5755  | H | -2.4335 | -3.2641 | -0.0305 |
| H            | -0.3542 | -3.8487 | -0.1121 | H            | -2.0662 | -3.7279 | 1.5098  | H | -1.6771 | -3.9214 | -1.498  |
| H            | -0.3117 | -3.9328 | 1.6451  | H            | -1.2091 | -3.7404 | 3.0464  | H | -1.4957 | -4.7505 | 0.0433  |
| H            | 1.6894  | 0.3942  | -4.7116 | H            | -0.1002 | -2.4988 | -4.618  | H | 2.1924  | 0.3118  | -4.6786 |
| H            | 0.2484  | 1.4081  | -4.8431 | H            | -0.9593 | -0.9692 | -4.8256 | H | 1.142   | 1.7243  | -4.5294 |
| H            | 0.2509  | -0.2364 | -5.5184 | H            | -1.8608 | -2.5007 | -4.7914 | H | 0.7023  | 0.3929  | -5.6227 |
| H            | -2.5537 | 1.6524  | -6.5031 | H            | -4.5621 | 1.3556  | -4.6368 | H | -2.7458 | 2.6468  | -6.8471 |
| H            | -3.738  | 0.4168  | -6.9787 | H            | -4.4146 | -0.1281 | -5.6409 | H | -2.8711 | 3.3463  | -5.2205 |
| H            | -4.0854 | 1.4566  | -5.5828 | H            | -5.9399 | 0.2479  | -4.8159 | H | -1.2808 | 3.2638  | -6.0545 |
| H            | 0.8261  | 2.6052  | -0.0069 | H            | 1.9282  | 0.7986  | -1.985  | H | 2.2874  | 1.6834  | -0.2492 |
| H            | 1.7927  | 2.39    | 1.4447  | H            | 2.8976  | 1.1321  | -0.5729 | H | 2.5477  | 1.2101  | 1.4099  |
| H            | 0.3331  | 1.4337  | 1.2118  | H            | 1.1464  | 1.1659  | -0.4467 | H | 0.9175  | 1.2111  | 0.7574  |
| H            | 3.8617  | 1.9867  | -0.1457 | H            | 4.0723  | -0.9952 | -1.195  | H | 4.291   | -0.3069 | 0.4364  |
| H            | 3.6708  | 0.8364  | -1.4747 | H            | 3.2456  | -2.5555 | -1.1802 | H | 3.8725  | -1.6265 | -0.6596 |
| H            | 2.721   | 2.3328  | -1.4185 | H            | 2.9077  | -1.3886 | -2.4536 | H | 3.811   | 0.0405  | -1.2202 |
| H            | 4.6076  | -3.4845 | 0.0552  | H            | 5.4989  | 1.0928  | 3.4317  | H | 3.3451  | -0.9609 | 5.5849  |
| H            | 5.5494  | -2.2649 | -0.8705 | H            | 6.0536  | -0.0354 | 2.1758  | H | 4.5668  | -1.2838 | 4.3356  |
| H            | 6.2221  | -2.9907 | 0.6042  | H            | 5.2937  | 1.5302  | 1.7247  | H | 3.7273  | 0.3045  | 4.4016  |
| H            | 0.5793  | 1.4433  | 7.1694  | H            | 3.6749  | 5.1014  | 2.3382  | H | 1.2801  | 3.0811  | 5.8479  |
| H            | 0.2859  | 2.9138  | 5.1928  | H            | 2.2051  | 4.8637  | 0.3517  | H | 0.7713  | 3.939   | 3.5746  |
| H            | -0.9236 | 2.0925  | 3.2018  | H            | 0.3332  | 3.2497  | 0.3768  | H | -0.5778 | 2.5841  | 2.008   |
| H            | -1.5604 | -1.6986 | 5.1658  | H            | 1.4049  | 2.083   | 4.3898  | H | -0.9056 | -0.5183 | 4.9883  |
| H            | -0.349  | -0.8579 | 7.1573  | H            | 3.2656  | 3.7155  | 4.3596  | H | 0.4316  | 0.8552  | 6.5547  |
| <b>3H-10</b> |         |         |         | <b>3H-11</b> |         |         |         |   |         |         |         |
| C            | -3.0522 | 1.1096  | 0.0537  | C            | -3.3041 | -0.3185 | 0.6276  |   |         |         |         |
| C            | -2.1452 | 0.2264  | 0.933   | C            | -1.927  | -0.7546 | 1.1656  |   |         |         |         |
| C            | -1.754  | -0.8877 | -0.0704 | C            | -1.3485 | -1.495  | -0.0658 |   |         |         |         |
| C            | -1.5631 | -0.1318 | -1.4074 | C            | -1.7259 | -0.5666 | -1.2245 |   |         |         |         |
| C            | -2.2554 | 1.2289  | -1.2494 | C            | -3.038  | 0.1189  | -0.8238 |   |         |         |         |
| C            | -0.6397 | -1.9337 | 0.2977  | C            | 0.156   | -1.9322 | -0.071  |   |         |         |         |
| C            | -0.8533 | -1.9465 | -2.7648 | C            | -0.3637 | -0.6937 | -3.2128 |   |         |         |         |
| C            | -2      | -0.9458 | -2.6342 | C            | -1.6281 | -1.2925 | -2.5875 |   |         |         |         |
| C            | -3.4276 | 2.4692  | 0.6229  | C            | -4.0294 | 0.7517  | 1.429   |   |         |         |         |
| C            | -0.5338 | -2.1649 | 1.7949  | C            | 0.6107  | -2.2999 | 1.3366  |   |         |         |         |
| C            | 0.395   | -1.6691 | 2.6284  | C            | 1.4633  | -1.6351 | 2.1347  |   |         |         |         |
| C            | 1.5978  | -0.8263 | 2.3591  | C            | 2.306   | -0.4245 | 1.903   |   |         |         |         |
| C            | 2.0211  | -0.4833 | 0.9234  | C            | 2.4309  | 0.2127  | 0.5138  |   |         |         |         |
| C            | 0.6274  | -2.0129 | -0.6565 | C            | 1.1058  | -1.2284 | -1.1389 |   |         |         |         |
| C            | 0.3036  | -1.2703 | -1.9843 | C            | 0.3709  | -0.1353 | -1.9883 |   |         |         |         |
| C            | -1.6345 | -3.0301 | 2.3794  | C            | 0.005   | -3.5892 | 1.8697  |   |         |         |         |
| C            | -0.4459 | -2.3038 | -4.1916 | C            | -0.655  | 0.4175  | -4.2285 |   |         |         |         |
| O            | -2.0587 | -0.0825 | -3.7876 | O            | -2.7589 | -1.1249 | -3.4506 |   |         |         |         |
| H            | -2.6819 | -1.4758 | -0.1752 | H            | -1.9487 | -2.4145 | -0.1636 |   |         |         |         |
| O            | -0.1588 | 0.0375  | -1.6237 | O            | -0.6919 | 0.4382  | -1.2357 |   |         |         |         |
| C            | -3.0461 | -0.3348 | -4.6869 | C            | -3.7685 | -2.0202 | -3.2686 |   |         |         |         |
| C            | -2.9757 | 0.6518  | -5.8115 | C            | -4.8665 | -1.7642 | -4.254  |   |         |         |         |
| O            | -3.8708 | -1.2334 | -4.6056 | O            | -3.7899 | -2.8955 | -2.4151 |   |         |         |         |
| C            | 2.0586  | -1.6939 | -0.0548 | C            | 2.552   | -0.7841 | -0.6752 |   |         |         |         |
| C            | 3.0901  | -1.4222 | -1.1885 | C            | 3.3235  | -0.1245 | -1.8627 |   |         |         |         |
| C            | 2.6141  | -2.9744 | 0.636   | C            | 3.4303  | -2.0237 | -0.3451 |   |         |         |         |
| O            | 3.3652  | 0.0591  | 1.0949  | O            | 3.6361  | 1.0255  | 0.6081  |   |         |         |         |
| H            | 0.7102  | -3.0715 | -0.9536 | H            | 1.3375  | -2.0223 | -1.8685 |   |         |         |         |
| C            | 3.66    | 1.2514  | 0.5131  | C            | 3.5523  | 2.333   | 0.2443  |   |         |         |         |
| C            | 5.0548  | 1.6573  | 0.8794  | C            | 4.8622  | 3.0127  | 0.5014  |   |         |         |         |
| O            | 2.9257  | 1.9067  | -0.2105 | O            | 2.5765  | 2.8867  | -0.24   |   |         |         |         |
| H            | -1.1293 | -2.8725 | -0.0207 | H            | 0.0953  | -2.9301 | -0.5432 |   |         |         |         |

|   |         |         |         |   |         |         |         |  |  |  |  |
|---|---------|---------|---------|---|---------|---------|---------|--|--|--|--|
| O | -1.0249 | 0.9943  | 1.3842  | O | -1.1419 | 0.3875  | 1.5279  |  |  |  |  |
| C | -1.1375 | 1.5111  | 2.6366  | C | -1.1333 | 0.7188  | 2.8427  |  |  |  |  |
| C | 1.9427  | 4.3614  | 3.4969  | C | 0.9307  | 4.4084  | 3.5498  |  |  |  |  |
| C | 1.7084  | 3.986   | 2.1749  | C | 0.6464  | 4.0253  | 2.2399  |  |  |  |  |
| C | 0.71    | 3.056   | 1.8757  | C | -0.0275 | 2.8279  | 1.9886  |  |  |  |  |
| C | -0.056  | 2.4938  | 2.9031  | C | -0.4149 | 2.0035  | 3.0521  |  |  |  |  |
| C | 0.177   | 2.883   | 4.2291  | C | -0.1319 | 2.3982  | 4.3672  |  |  |  |  |
| C | 1.1767  | 3.8121  | 4.5243  | C | 0.5404  | 3.5969  | 4.6141  |  |  |  |  |
| O | -2.0072 | 1.2463  | 3.4526  | O | -1.6452 | 0.0848  | 3.7525  |  |  |  |  |
| H | -3.9809 | 0.5592  | -0.1525 | H | -3.9481 | -1.209  | 0.5947  |  |  |  |  |
| H | -2.7124 | -0.2014 | 1.7673  | H | -2.0485 | -1.4433 | 2.0084  |  |  |  |  |
| H | -1.514  | 2.0352  | -1.1893 | H | -2.9435 | 1.2092  | -0.8969 |  |  |  |  |
| H | -2.9351 | 1.4707  | -2.0726 | H | -3.8957 | -0.1705 | -1.4346 |  |  |  |  |
| H | -1.1392 | -2.8872 | -2.2794 | H | 0.2275  | -1.4602 | -3.7266 |  |  |  |  |
| H | -2.9633 | -1.4372 | -2.4583 | H | -1.4476 | -2.3667 | -2.4465 |  |  |  |  |
| H | -2.5549 | 3.1142  | 0.7637  | H | -5.0117 | 0.9557  | 0.9895  |  |  |  |  |
| H | -4.1103 | 2.9894  | -0.0576 | H | -4.1871 | 0.4228  | 2.4609  |  |  |  |  |
| H | -3.9354 | 2.3588  | 1.5861  | H | -3.4761 | 1.6959  | 1.4481  |  |  |  |  |
| H | 0.2993  | -1.9106 | 3.6889  | H | 1.6316  | -2.0462 | 3.1328  |  |  |  |  |
| H | 2.4429  | -1.3248 | 2.8567  | H | 3.3184  | -0.694  | 2.2401  |  |  |  |  |
| H | 1.494   | 0.1095  | 2.9199  | H | 1.9968  | 0.3528  | 2.6123  |  |  |  |  |
| H | 1.3593  | 0.2909  | 0.5251  | H | 1.5614  | 0.8586  | 0.3555  |  |  |  |  |
| H | 1.1666  | -1.1599 | -2.6406 | H | 1.0239  | 0.6819  | -2.2863 |  |  |  |  |
| H | -2.6201 | -2.6145 | 2.149   | H | -1.0875 | -3.549  | 1.865   |  |  |  |  |
| H | -1.5783 | -4.0416 | 1.9632  | H | 0.3211  | -4.4343 | 1.2488  |  |  |  |  |
| H | -1.5656 | -3.1197 | 3.4688  | H | 0.3156  | -3.8068 | 2.8973  |  |  |  |  |
| H | 0.3657  | -3.0394 | -4.181  | H | 0.2784  | 0.8769  | -4.5714 |  |  |  |  |
| H | -0.0911 | -1.4303 | -4.7484 | H | -1.2817 | 1.2076  | -3.8013 |  |  |  |  |
| H | -1.2866 | -2.7441 | -4.737  | H | -1.1648 | 0.016   | -5.1106 |  |  |  |  |
| H | -3.0963 | 1.6661  | -5.4227 | H | -5.3002 | -0.7771 | -4.076  |  |  |  |  |
| H | -2.0211 | 0.5501  | -6.3337 | H | -4.4754 | -1.8354 | -5.2721 |  |  |  |  |
| H | -3.7848 | 0.4524  | -6.5199 | H | -5.648  | -2.5192 | -4.1298 |  |  |  |  |
| H | 3.0523  | -2.2057 | -1.9547 | H | 3.2182  | -0.719  | -2.7779 |  |  |  |  |
| H | 4.1183  | -1.4129 | -0.8068 | H | 4.3973  | -0.0527 | -1.649  |  |  |  |  |
| H | 2.9209  | -0.4559 | -1.6738 | H | 2.9898  | 0.8922  | -2.0827 |  |  |  |  |
| H | 3.5602  | -2.7688 | 1.1499  | H | 4.3936  | -1.7186 | 0.0801  |  |  |  |  |
| H | 1.9248  | -3.4087 | 1.3625  | H | 2.975   | -2.7291 | 0.3487  |  |  |  |  |
| H | 2.8122  | -3.7611 | -0.1027 | H | 3.6438  | -2.5993 | -1.2546 |  |  |  |  |
| H | 5.1412  | 1.7479  | 1.9652  | H | 5.1246  | 2.9246  | 1.5588  |  |  |  |  |
| H | 5.7672  | 0.9231  | 0.4954  | H | 5.6387  | 2.5693  | -0.1268 |  |  |  |  |
| H | 5.2785  | 2.63    | 0.4319  | H | 4.7741  | 4.0746  | 0.2548  |  |  |  |  |
| H | 2.7193  | 5.0871  | 3.7254  | H | 1.4543  | 5.3419  | 3.74    |  |  |  |  |
| H | 2.3017  | 4.4129  | 1.3692  | H | 0.9528  | 4.6528  | 1.4055  |  |  |  |  |
| H | 0.545   | 2.7791  | 0.8358  | H | -0.236  | 2.5506  | 0.9566  |  |  |  |  |
| H | -0.4206 | 2.4631  | 5.0359  | H | -0.4349 | 1.7715  | 5.2038  |  |  |  |  |
| H | 1.3539  | 4.1097  | 5.5548  | H | 0.7571  | 3.897   | 5.6361  |  |  |  |  |

**Table S27.** Experimental chemical shifts of **3**, calculated shielding tensors and chemical shifts of isomers **3A–3D** in gas phase with TMS as reference at mPW1PW91/6-31G\* level.

| Nuclie                                                                                                                                                                                                                                                                                                                                                                                                                                                                          | $\delta(\text{exptl})$ | 3A                    |                        |                         |            |            | 3B                    |                        |                         |            |            | 3C                    |                        |                         |            |            | 3D                    |                        |                         |            |            |
|---------------------------------------------------------------------------------------------------------------------------------------------------------------------------------------------------------------------------------------------------------------------------------------------------------------------------------------------------------------------------------------------------------------------------------------------------------------------------------|------------------------|-----------------------|------------------------|-------------------------|------------|------------|-----------------------|------------------------|-------------------------|------------|------------|-----------------------|------------------------|-------------------------|------------|------------|-----------------------|------------------------|-------------------------|------------|------------|
|                                                                                                                                                                                                                                                                                                                                                                                                                                                                                 |                        | $\sigma_{\text{iso}}$ | $\delta(\text{calcd})$ | $\delta(\text{scaled})$ | $\Delta 1$ | $\Delta 2$ | $\sigma_{\text{iso}}$ | $\delta(\text{calcd})$ | $\delta(\text{scaled})$ | $\Delta 1$ | $\Delta 2$ | $\sigma_{\text{iso}}$ | $\delta(\text{calcd})$ | $\delta(\text{scaled})$ | $\Delta 1$ | $\Delta 2$ | $\sigma_{\text{iso}}$ | $\delta(\text{calcd})$ | $\delta(\text{scaled})$ | $\Delta 1$ | $\Delta 2$ |
| C-1                                                                                                                                                                                                                                                                                                                                                                                                                                                                             | 36.3                   | 156.6                 | 35.4                   | 36.3                    | 0.9        | 0.0        | 155.2                 | 36.8                   | 36.6                    | 0.5        | 0.3        | 155.0                 | 37.0                   | 35.9                    | 0.7        | 0.4        | 156.5                 | 35.5                   | 36.4                    | 0.8        | 0.1        |
| C-2                                                                                                                                                                                                                                                                                                                                                                                                                                                                             | 36.3                   | 156.1                 | 35.9                   | 36.8                    | 0.4        | 0.5        | 155.9                 | 36.1                   | 35.8                    | 0.2        | 0.5        | 155.4                 | 36.6                   | 35.5                    | 0.3        | 0.8        | 156.2                 | 35.8                   | 36.7                    | 0.5        | 0.4        |
| C-3                                                                                                                                                                                                                                                                                                                                                                                                                                                                             | 78.6                   | 117.0                 | 75.0                   | 78.1                    | 3.6        | 0.5        | 113.2                 | 78.8                   | 81.5                    | 0.2        | 2.9        | 114.3                 | 77.7                   | 79.9                    | 0.9        | 1.3        | 116.8                 | 75.2                   | 78.3                    | 3.4        | 0.3        |
| C-4                                                                                                                                                                                                                                                                                                                                                                                                                                                                             | 46.4                   | 147.1                 | 44.9                   | 46.3                    | 1.5        | 0.1        | 146.4                 | 45.6                   | 46.1                    | 0.8        | 0.3        | 144.9                 | 47.1                   | 46.9                    | 0.7        | 0.5        | 146.9                 | 45.1                   | 46.6                    | 1.3        | 0.2        |
| C-5                                                                                                                                                                                                                                                                                                                                                                                                                                                                             | 31.7                   | 160.5                 | 31.5                   | 32.1                    | 0.2        | 0.4        | 157.8                 | 34.2                   | 33.9                    | 2.5        | 2.2        | 155.3                 | 36.7                   | 35.6                    | 5.0        | 3.9        | 160.0                 | 32.0                   | 32.6                    | 0.3        | 0.9        |
| C-6                                                                                                                                                                                                                                                                                                                                                                                                                                                                             | 140.5                  | 54.7                  | 137.3                  | 143.8                   | 3.2        | 3.3        | 61.4                  | 130.6                  | 136.8                   | 9.9        | 3.7        | 58.3                  | 133.7                  | 140.2                   | 6.8        | 0.3        | 55.8                  | 136.2                  | 142.9                   | 4.3        | 2.4        |
| C-7                                                                                                                                                                                                                                                                                                                                                                                                                                                                             | 121.7                  | 71.5                  | 120.5                  | 126.1                   | 1.2        | 4.4        | 71.2                  | 120.8                  | 126.4                   | 0.9        | 4.7        | 71.7                  | 120.3                  | 125.8                   | 1.4        | 4.1        | 72.1                  | 119.9                  | 125.6                   | 1.8        | 3.9        |
| C-8                                                                                                                                                                                                                                                                                                                                                                                                                                                                             | 25.3                   | 163.5                 | 28.5                   | 29.0                    | 3.2        | 3.7        | 160.2                 | 31.8                   | 31.3                    | 6.5        | 6.0        | 161.3                 | 30.7                   | 29.2                    | 5.4        | 3.9        | 166.2                 | 25.8                   | 26.1                    | 0.5        | 0.8        |
| C-9                                                                                                                                                                                                                                                                                                                                                                                                                                                                             | 77.9                   | 117.6                 | 74.4                   | 77.4                    | 3.5        | 0.5        | 116.9                 | 75.1                   | 77.5                    | 2.8        | 0.4        | 117.2                 | 74.8                   | 76.8                    | 3.1        | 1.1        | 117.1                 | 74.9                   | 78.0                    | 3.0        | 0.1        |
| C-10                                                                                                                                                                                                                                                                                                                                                                                                                                                                            | 41.0                   | 150.1                 | 41.9                   | 43.2                    | 0.9        | 2.2        | 155.5                 | 36.5                   | 36.3                    | 4.5        | 4.7        | 153.8                 | 38.2                   | 37.3                    | 2.8        | 3.7        | 151.1                 | 40.9                   | 42.1                    | 0.1        | 1.1        |
| C-11                                                                                                                                                                                                                                                                                                                                                                                                                                                                            | 47.0                   | 141.5                 | 50.5                   | 52.2                    | 3.5        | 5.2        | 144.1                 | 47.9                   | 48.4                    | 0.9        | 1.4        | 143.5                 | 48.5                   | 48.3                    | 1.5        | 1.3        | 146.2                 | 45.8                   | 47.2                    | 1.2        | 0.2        |
| C-12                                                                                                                                                                                                                                                                                                                                                                                                                                                                            | 80.4                   | 115.1                 | 76.9                   | 80.1                    | 3.5        | 0.3        | 113.6                 | 78.4                   | 81.0                    | 2.0        | 0.6        | 111.9                 | 80.1                   | 82.4                    | 0.3        | 2.0        | 115.4                 | 76.6                   | 79.8                    | 3.8        | 0.6        |
| C-13                                                                                                                                                                                                                                                                                                                                                                                                                                                                            | 44.5                   | 147.7                 | 44.3                   | 45.6                    | 0.2        | 1.1        | 152.7                 | 39.3                   | 39.3                    | 5.2        | 5.2        | 153.0                 | 39.0                   | 38.2                    | 5.5        | 6.3        | 147.8                 | 44.2                   | 45.6                    | 0.3        | 1.1        |
| C-14                                                                                                                                                                                                                                                                                                                                                                                                                                                                            | 79.2                   | 114.5                 | 77.5                   | 80.7                    | 1.7        | 1.5        | 114.0                 | 78.0                   | 80.6                    | 1.2        | 1.4        | 113.9                 | 78.1                   | 80.3                    | 1.1        | 1.1        | 114.3                 | 77.7                   | 81.0                    | 1.5        | 1.8        |
| C-15                                                                                                                                                                                                                                                                                                                                                                                                                                                                            | 89.7                   | 104.4                 | 87.6                   | 91.4                    | 2.1        | 1.7        | 102.5                 | 89.5                   | 92.9                    | 0.2        | 3.2        | 103.2                 | 88.8                   | 91.8                    | 0.9        | 2.1        | 104.3                 | 87.7                   | 91.6                    | 2.0        | 1.9        |
| C-16                                                                                                                                                                                                                                                                                                                                                                                                                                                                            | 13.4                   | 179.2                 | 12.8                   | 12.4                    | 0.6        | 1.0        | 178.1                 | 13.9                   | 12.1                    | 0.5        | 1.3        | 178.2                 | 13.8                   | 10.9                    | 0.4        | 2.5        | 179.1                 | 12.9                   | 12.4                    | 0.5        | 1.0        |
| C-17                                                                                                                                                                                                                                                                                                                                                                                                                                                                            | 20.4                   | 171.4                 | 20.6                   | 20.6                    | 0.2        | 0.2        | 165.5                 | 26.5                   | 25.6                    | 6.1        | 5.2        | 164.0                 | 28.0                   | 26.2                    | 7.6        | 5.8        | 171.0                 | 21.0                   | 21.0                    | 0.6        | 0.6        |
| C-18                                                                                                                                                                                                                                                                                                                                                                                                                                                                            | 27.2                   | 167.1                 | 24.9                   | 25.2                    | 2.3        | 2.0        | 163.8                 | 28.2                   | 27.4                    | 1.0        | 0.2        | 165.8                 | 26.2                   | 24.2                    | 1.0        | 3.0        | 166.2                 | 25.8                   | 26.1                    | 1.4        | 1.1        |
| C-19                                                                                                                                                                                                                                                                                                                                                                                                                                                                            | 20.6                   | 177.9                 | 14.1                   | 13.8                    | 6.5        | 6.8        | 171.6                 | 20.4                   | 19.1                    | 0.2        | 1.5        | 165.4                 | 26.6                   | 24.7                    | 6.0        | 4.1        | 172.7                 | 19.3                   | 19.3                    | 1.3        | 1.3        |
| C-20                                                                                                                                                                                                                                                                                                                                                                                                                                                                            | 13.3                   | 178.9                 | 13.1                   | 12.8                    | 0.2        | 0.5        | 177.8                 | 14.2                   | 12.4                    | 0.9        | 0.9        | 176.1                 | 15.9                   | 13.1                    | 2.6        | 0.2        | 178.7                 | 13.3                   | 12.8                    | 0.0        | 0.5        |
| C-1'                                                                                                                                                                                                                                                                                                                                                                                                                                                                            | 165.4                  | 35.2                  | 156.8                  | 164.4                   | 8.6        | 1.0        | 33.6                  | 158.4                  | 166.5                   | 7.0        | 1.1        | 34.5                  | 157.5                  | 166.0                   | 7.9        | 0.6        | 35.2                  | 156.8                  | 164.7                   | 8.6        | 0.7        |
| C-2'                                                                                                                                                                                                                                                                                                                                                                                                                                                                            | 129.8                  | 68.9                  | 123.1                  | 128.9                   | 6.7        | 0.9        | 68.0                  | 124.0                  | 129.7                   | 5.8        | 0.1        | 68.6                  | 123.4                  | 129.2                   | 6.4        | 0.6        | 69.0                  | 123.0                  | 129.0                   | 6.8        | 0.8        |
| C-3',7'                                                                                                                                                                                                                                                                                                                                                                                                                                                                         | 129.5                  | 66.0                  | 126.0                  | 131.9                   | 3.5        | 2.4        | 67.7                  | 124.3                  | 130.1                   | 5.2        | 0.6        | 68.5                  | 123.5                  | 129.2                   | 6.0        | 0.3        | 65.9                  | 126.1                  | 132.2                   | 3.4        | 2.7        |
| C-3',7'                                                                                                                                                                                                                                                                                                                                                                                                                                                                         | 129.5                  | 69.5                  | 122.5                  | 128.2                   | 7.0        | 1.3        | 66.8                  | 125.2                  | 131.1                   | 4.3        | 1.6        | 66.4                  | 125.6                  | 131.5                   | 3.9        | 2.0        | 69.6                  | 122.4                  | 128.3                   | 7.1        | 1.2        |
| C-4',6'                                                                                                                                                                                                                                                                                                                                                                                                                                                                         | 128.5                  | 70.5                  | 121.5                  | 127.1                   | 7.0        | 1.4        | 70.5                  | 121.5                  | 127.1                   | 7.0        | 1.4        | 70.8                  | 121.2                  | 126.7                   | 7.3        | 1.8        | 70.5                  | 121.5                  | 127.4                   | 7.0        | 1.1        |
| C-4',6'                                                                                                                                                                                                                                                                                                                                                                                                                                                                         | 128.5                  | 70.9                  | 121.1                  | 126.7                   | 7.4        | 1.8        | 71.0                  | 121.0                  | 126.5                   | 7.5        | 2.0        | 70.7                  | 121.3                  | 126.9                   | 7.2        | 1.6        | 70.9                  | 121.1                  | 126.9                   | 7.4        | 1.6        |
| C-5'                                                                                                                                                                                                                                                                                                                                                                                                                                                                            | 133.2                  | 66.4                  | 125.6                  | 131.5                   | 7.6        | 1.7        | 66.3                  | 125.7                  | 131.6                   | 7.5        | 1.6        | 66.3                  | 125.7                  | 131.6                   | 7.5        | 1.6        | 66.3                  | 125.7                  | 131.8                   | 7.5        | 1.4        |
| C-1''                                                                                                                                                                                                                                                                                                                                                                                                                                                                           | 170.4                  | 31.5                  | 160.5                  | 168.3                   | 9.9        | 2.1        | 30.2                  | 161.8                  | 170.1                   | 8.6        | 0.3        | 30.9                  | 161.1                  | 169.9                   | 9.3        | 0.5        | 31.7                  | 160.3                  | 168.4                   | 10.1       | 2.0        |
| C-2''                                                                                                                                                                                                                                                                                                                                                                                                                                                                           | 21.0                   | 172.6                 | 19.4                   | 19.4                    | 1.6        | 1.6        | 173.0                 | 19.0                   | 17.6                    | 2.0        | 3.4        | 171.4                 | 20.6                   | 18.2                    | 0.4        | 2.8        | 172.6                 | 19.4                   | 19.3                    | 1.6        | 1.7        |
| C-1'''                                                                                                                                                                                                                                                                                                                                                                                                                                                                          | 171.3                  | 30.1                  | 161.9                  | 169.8                   | 9.4        | 1.5        | 30.3                  | 161.7                  | 170.0                   | 9.6        | 1.3        | 30.5                  | 161.5                  | 170.2                   | 9.8        | 1.1        | 30.1                  | 161.9                  | 170.1                   | 9.4        | 1.2        |
| C-2'''                                                                                                                                                                                                                                                                                                                                                                                                                                                                          | 20.9                   | 172.8                 | 19.2                   | 19.2                    | 1.7        | 1.7        | 172.8                 | 19.2                   | 17.8                    | 1.7        | 3.1        | 172.8                 | 19.2                   | 16.7                    | 1.7        | 4.2        | 172.7                 | 19.3                   | 19.2                    | 1.6        | 1.7        |
| $\Delta 1 =  \delta(\text{calcd}) - \delta(\text{exptl}) $ , $\Delta 2 =  \delta(\text{scaled}) - \delta(\text{exptl}) $ ;<br><b>3A:</b> $Y = 0.9476X + 1.0201$ , $R^2 = 0.9980$ , MAE = 3.5 ppm, CMAE = 1.7 ppm; <b>3B:</b> $Y = 0.9361X + 2.5303$ , $R^2 = 0.9974$ , MAE = 3.7 ppm, CMAE = 2.0 ppm;<br><b>3C:</b> $Y = 0.927X + 3.6835$ , $R^2 = 0.9974$ , MAE = 3.9 ppm, CMAE = 2.1 ppm; <b>3D:</b> $Y = 0.9451X + 1.1367$ , $R^2 = 0.9992$ , MAE = 3.2 ppm, CMAE = 1.2 ppm. |                        |                       |                        |                         |            |            |                       |                        |                         |            |            |                       |                        |                         |            |            |                       |                        |                         |            |            |

  

| Nuclie | $\delta(\text{exptl})$ | 3A                    |                        |                         |            |            | 3B                    |                        |                         |            |            | 3C                    |                        |                         |            |            | 3D                    |                        |                         |            |            |
|--------|------------------------|-----------------------|------------------------|-------------------------|------------|------------|-----------------------|------------------------|-------------------------|------------|------------|-----------------------|------------------------|-------------------------|------------|------------|-----------------------|------------------------|-------------------------|------------|------------|
|        |                        | $\sigma_{\text{iso}}$ | $\delta(\text{calcd})$ | $\delta(\text{scaled})$ | $\Delta 1$ | $\Delta 2$ | $\sigma_{\text{iso}}$ | $\delta(\text{calcd})$ | $\delta(\text{scaled})$ | $\Delta 1$ | $\Delta 2$ | $\sigma_{\text{iso}}$ | $\delta(\text{calcd})$ | $\delta(\text{scaled})$ | $\Delta 1$ | $\Delta 2$ | $\sigma_{\text{iso}}$ | $\delta(\text{calcd})$ | $\delta(\text{scaled})$ | $\Delta 1$ | $\Delta 2$ |
| H-1a   | 1.90                   | 30.20                 | 1.80                   | 1.88                    | 0.10       | 0.02       | 29.93                 | 2.07                   | 2.07                    | 0.17       | 0.17       | 29.96                 | 2.04                   | 2.01                    | 0.14       | 0.11       | 30.17                 | 1.83                   | 1.89                    | 0.07       | 0.01       |
| H-1b   | 1.94                   | 29.93                 | 2.07                   | 2.13                    | 0.13       | 0.19       | 30.18                 | 1.82                   | 1.82                    | 0.12       | 0.12       | 30.22                 | 1.78                   | 1.75                    | 0.16       | 0.19       | 29.92                 | 2.08                   | 2.13                    | 0.14       | 0.19       |
| H-2    | 2.09                   | 30.01                 | 1.99                   | 2.06                    | 0.10       | 0.03       | 30.01                 | 1.99                   | 1.99                    | 0.10       | 0.10       | 29.99                 | 2.01                   | 1.98                    | 0.08       | 0.11       | 30.01                 | 1.99                   | 2.05                    | 0.10       | 0.04       |
| H-3    | 5.50                   | 26.49                 | 5.51                   | 5.51                    | 0.01       | 0.01       | 26.44                 | 5.56                   | 5.46                    | 0.06       | 0.04       | 26.50                 | 5.50                   | 5.40                    | 0.00       | 0.10       | 26.44                 | 5.56                   | 5.55                    | 0.06       | 0.05       |
| H-4    | 2.29                   | 30.20                 | 1.80                   | 1.88                    | 0.49       | 0.41       | 30.00                 | 2.00                   | 1.99                    | 0.29       | 0.30       | 29.94                 | 2.06                   | 2.03                    | 0.23       | 0.26       | 30.14                 | 1.86                   | 1.92                    | 0.43       | 0.37       |
| H-5    | 2.90                   | 28.71                 | 3.29                   | 3.33                    | 0.39       | 0.43       | 28.29                 | 3.71                   | 3.66                    | 0.81       | 0.76       | 29.13                 | 2.87                   | 2.82                    | 0.03       | 0.08       | 28.82                 | 3.18                   | 3.21                    | 0.28       | 0.31       |
| H-7    | 5.04                   | 26.58                 | 5.42                   | 5.41                    | 0.38       | 0.37       | 26.76                 | 5.24                   | 5.15                    | 0.20       | 0.11       | 26.65                 | 5.35                   | 5.26                    | 0.31       | 0.22       | 26.81                 | 5.19                   | 5.20                    | 0.15       | 0.16       |
| H-8a   | 1.92                   | 30.53                 | 1.47                   | 1.55                    | 0.45       | 0.37       | 29.96                 | 2.04                   | 2.04                    | 0.12       | 0.12       | 29.77                 | 2.23                   | 2.19                    | 0.31       | 0.27       | 30.00                 | 2.00                   | 2.05                    | 0.08       | 0.13       |
| H-8b   | 1.55                   | 29.87                 | 2.13                   | 2.20                    | 0.58       | 0.65       | 29.64                 | 2.36                   | 2.34                    | 0.81       | 0.79       | 29.83                 | 2.17                   | 2.13                    | 0.62       | 0.58       | 30.14                 | 1.86                   | 1.92                    | 0.31       | 0.37       |
| H-9    | 4.18                   | 27.82                 | 4.18                   | 4.20                    | 0.00       | 0.02       | 27.71                 | 4.29                   | 4.22                    | 0.11       | 0.04       | 27.47                 | 4.53                   | 4.45                    | 0.35       | 0.27       | 27.90                 | 4.10                   | 4.11                    | 0.08       | 0.07       |
| H-11   | 1.23                   | 30.91                 | 1.09                   | 1.18                    | 0.14       | 0.05       | 29.40                 | 2.60                   | 2.57                    | 1.37       | 1.34       | 29.44                 | 2.56                   | 2.51                    | 1.33       | 1.28       | 30.56                 | 1.44                   | 1.50                    | 0.21       | 0.27       |
| H-12   | 3.80                   | 28.24                 | 3.76                   | 3.79                    | 0.04       | 0.01       | 28.20                 | 3.80                   | 3.74                    | 0.00       | 0.06       | 27.92                 | 4.08                   | 4.01                    | 0.28       | 0.21       | 28.22                 | 3.78                   | 3.80                    | 0.02       | 0.00       |
| H-13   | 2.21                   | 29.97                 | 2.03                   | 2.10                    | 0.18       | 0.11       | 29.49                 | 2.51                   | 2.49                    | 0.30       | 0.28       | 28.85                 | 3.15                   | 3.10                    | 0.94       | 0.89       | 29.92                 | 2.08                   | 2.13                    | 0.13       | 0.08       |



|                                                                                                                                                                                                                                                                                                                                                                                                                                                                                                                                                                 |      |       |      |      |      |      |       |      |      |      |      |       |      |      |      |      |       |      |      |      |      |
|-----------------------------------------------------------------------------------------------------------------------------------------------------------------------------------------------------------------------------------------------------------------------------------------------------------------------------------------------------------------------------------------------------------------------------------------------------------------------------------------------------------------------------------------------------------------|------|-------|------|------|------|------|-------|------|------|------|------|-------|------|------|------|------|-------|------|------|------|------|
| H-14                                                                                                                                                                                                                                                                                                                                                                                                                                                                                                                                                            | 5.06 | 27.10 | 4.90 | 4.90 | 0.16 | 0.16 | 26.63 | 5.37 | 5.27 | 0.31 | 0.21 | 26.89 | 5.11 | 5.02 | 0.05 | 0.04 | 27.08 | 4.92 | 4.93 | 0.14 | 0.13 |
| H-16                                                                                                                                                                                                                                                                                                                                                                                                                                                                                                                                                            | 0.94 | 31.18 | 0.82 | 0.92 | 0.12 | 0.02 | 31.18 | 0.82 | 0.85 | 0.12 | 0.09 | 31.13 | 0.87 | 0.86 | 0.07 | 0.08 | 31.03 | 0.97 | 1.04 | 0.03 | 0.10 |
| H-16                                                                                                                                                                                                                                                                                                                                                                                                                                                                                                                                                            | 0.94 | 31.20 | 0.80 | 0.90 | 0.14 | 0.04 | 31.09 | 0.91 | 0.94 | 0.03 | 0.00 | 31.18 | 0.82 | 0.81 | 0.12 | 0.13 | 31.16 | 0.84 | 0.91 | 0.10 | 0.03 |
| H-16                                                                                                                                                                                                                                                                                                                                                                                                                                                                                                                                                            | 0.94 | 31.02 | 0.98 | 1.07 | 0.04 | 0.13 | 31.17 | 0.83 | 0.85 | 0.11 | 0.09 | 31.06 | 0.94 | 0.93 | 0.00 | 0.01 | 31.20 | 0.80 | 0.87 | 0.14 | 0.07 |
| H-17                                                                                                                                                                                                                                                                                                                                                                                                                                                                                                                                                            | 1.70 | 30.25 | 1.75 | 1.83 | 0.05 | 0.13 | 30.49 | 1.51 | 1.52 | 0.19 | 0.18 | 29.96 | 2.04 | 2.00 | 0.34 | 0.30 | 30.58 | 1.42 | 1.48 | 0.28 | 0.22 |
| H-17                                                                                                                                                                                                                                                                                                                                                                                                                                                                                                                                                            | 1.70 | 30.45 | 1.55 | 1.62 | 0.15 | 0.08 | 30.10 | 1.90 | 1.89 | 0.20 | 0.19 | 30.52 | 1.48 | 1.46 | 0.22 | 0.24 | 30.17 | 1.83 | 1.88 | 0.13 | 0.18 |
| H-17                                                                                                                                                                                                                                                                                                                                                                                                                                                                                                                                                            | 1.70 | 30.57 | 1.43 | 1.51 | 0.27 | 0.19 | 30.23 | 1.77 | 1.77 | 0.07 | 0.07 | 30.47 | 1.53 | 1.51 | 0.17 | 0.19 | 30.38 | 1.62 | 1.68 | 0.08 | 0.02 |
| H-18                                                                                                                                                                                                                                                                                                                                                                                                                                                                                                                                                            | 0.84 | 31.07 | 0.93 | 1.02 | 0.09 | 0.18 | 31.75 | 0.25 | 0.29 | 0.59 | 0.55 | 30.48 | 1.52 | 1.50 | 0.68 | 0.66 | 31.01 | 0.99 | 1.05 | 0.15 | 0.21 |
| H-18                                                                                                                                                                                                                                                                                                                                                                                                                                                                                                                                                            | 0.84 | 30.88 | 1.12 | 1.21 | 0.28 | 0.37 | 31.07 | 0.93 | 0.95 | 0.09 | 0.11 | 31.44 | 0.56 | 0.56 | 0.28 | 0.28 | 31.49 | 0.51 | 0.58 | 0.33 | 0.26 |
| H-18                                                                                                                                                                                                                                                                                                                                                                                                                                                                                                                                                            | 0.84 | 31.67 | 0.33 | 0.44 | 0.51 | 0.40 | 31.22 | 0.78 | 0.80 | 0.06 | 0.04 | 31.53 | 0.47 | 0.47 | 0.37 | 0.37 | 31.04 | 0.96 | 1.02 | 0.12 | 0.18 |
| H-19                                                                                                                                                                                                                                                                                                                                                                                                                                                                                                                                                            | 1.01 | 30.98 | 1.02 | 1.12 | 0.01 | 0.11 | 30.63 | 1.37 | 1.38 | 0.36 | 0.37 | 31.62 | 0.38 | 0.38 | 0.63 | 0.63 | 30.60 | 1.40 | 1.46 | 0.39 | 0.45 |
| H-19                                                                                                                                                                                                                                                                                                                                                                                                                                                                                                                                                            | 1.01 | 31.01 | 0.99 | 1.08 | 0.02 | 0.07 | 31.39 | 0.61 | 0.64 | 0.40 | 0.37 | 31.54 | 0.46 | 0.46 | 0.55 | 0.55 | 30.65 | 1.35 | 1.41 | 0.34 | 0.40 |
| H-19                                                                                                                                                                                                                                                                                                                                                                                                                                                                                                                                                            | 1.01 | 30.50 | 1.50 | 1.58 | 0.49 | 0.57 | 31.51 | 0.49 | 0.52 | 0.52 | 0.49 | 30.78 | 1.22 | 1.21 | 0.21 | 0.20 | 31.59 | 0.41 | 0.48 | 0.60 | 0.53 |
| H-20                                                                                                                                                                                                                                                                                                                                                                                                                                                                                                                                                            | 0.99 | 31.09 | 0.91 | 1.01 | 0.08 | 0.02 | 30.87 | 1.13 | 1.15 | 0.14 | 0.16 | 30.97 | 1.03 | 1.02 | 0.04 | 0.03 | 30.88 | 1.12 | 1.18 | 0.13 | 0.19 |
| H-20                                                                                                                                                                                                                                                                                                                                                                                                                                                                                                                                                            | 0.99 | 30.89 | 1.11 | 1.20 | 0.12 | 0.21 | 31.03 | 0.97 | 0.99 | 0.02 | 0.00 | 30.75 | 1.25 | 1.24 | 0.26 | 0.25 | 31.17 | 0.83 | 0.90 | 0.16 | 0.09 |
| H-20                                                                                                                                                                                                                                                                                                                                                                                                                                                                                                                                                            | 0.99 | 31.19 | 0.81 | 0.91 | 0.18 | 0.08 | 31.12 | 0.88 | 0.91 | 0.11 | 0.08 | 31.29 | 0.71 | 0.70 | 0.28 | 0.29 | 31.07 | 0.93 | 1.00 | 0.06 | 0.01 |
| H-3',7'                                                                                                                                                                                                                                                                                                                                                                                                                                                                                                                                                         | 7.99 | 23.81 | 8.19 | 8.12 | 0.20 | 0.13 | 23.53 | 8.47 | 8.29 | 0.48 | 0.30 | 23.63 | 8.37 | 8.21 | 0.38 | 0.22 | 23.81 | 8.19 | 8.15 | 0.20 | 0.16 |
| H-3',7'                                                                                                                                                                                                                                                                                                                                                                                                                                                                                                                                                         | 7.99 | 23.78 | 8.22 | 8.15 | 0.23 | 0.16 | 23.88 | 8.12 | 7.95 | 0.13 | 0.04 | 23.82 | 8.18 | 8.03 | 0.19 | 0.04 | 23.83 | 8.17 | 8.13 | 0.18 | 0.14 |
| H-4',6'                                                                                                                                                                                                                                                                                                                                                                                                                                                                                                                                                         | 7.37 | 24.65 | 7.35 | 7.30 | 0.02 | 0.07 | 24.63 | 7.37 | 7.22 | 0.00 | 0.15 | 24.65 | 7.35 | 7.22 | 0.02 | 0.15 | 24.63 | 7.37 | 7.34 | 0.00 | 0.03 |
| H-4',6'                                                                                                                                                                                                                                                                                                                                                                                                                                                                                                                                                         | 7.37 | 24.65 | 7.35 | 7.30 | 0.02 | 0.07 | 24.65 | 7.35 | 7.20 | 0.02 | 0.17 | 24.63 | 7.37 | 7.24 | 0.00 | 0.13 | 24.68 | 7.32 | 7.29 | 0.05 | 0.08 |
| H-5'                                                                                                                                                                                                                                                                                                                                                                                                                                                                                                                                                            | 7.49 | 24.57 | 7.43 | 7.38 | 0.06 | 0.11 | 24.55 | 7.45 | 7.30 | 0.04 | 0.19 | 24.56 | 7.44 | 7.30 | 0.05 | 0.19 | 24.57 | 7.43 | 7.40 | 0.06 | 0.09 |
| H-2''                                                                                                                                                                                                                                                                                                                                                                                                                                                                                                                                                           | 1.90 | 30.30 | 1.70 | 1.77 | 0.20 | 0.13 | 30.49 | 1.51 | 1.51 | 0.39 | 0.39 | 30.20 | 1.80 | 1.77 | 0.10 | 0.13 | 30.66 | 1.34 | 1.40 | 0.56 | 0.50 |
| H-2''                                                                                                                                                                                                                                                                                                                                                                                                                                                                                                                                                           | 1.90 | 30.40 | 1.60 | 1.67 | 0.30 | 0.23 | 30.68 | 1.32 | 1.34 | 0.58 | 0.56 | 30.36 | 1.64 | 1.62 | 0.26 | 0.28 | 30.26 | 1.74 | 1.79 | 0.16 | 0.11 |
| H-2''                                                                                                                                                                                                                                                                                                                                                                                                                                                                                                                                                           | 1.90 | 30.67 | 1.33 | 1.42 | 0.57 | 0.48 | 30.23 | 1.77 | 1.77 | 0.13 | 0.13 | 30.12 | 1.88 | 1.85 | 0.02 | 0.05 | 30.25 | 1.75 | 1.81 | 0.15 | 0.09 |
| H-2''                                                                                                                                                                                                                                                                                                                                                                                                                                                                                                                                                           | 2.11 | 30.45 | 1.55 | 1.63 | 0.56 | 0.48 | 30.16 | 1.84 | 1.83 | 0.27 | 0.28 | 30.05 | 1.95 | 1.92 | 0.16 | 0.19 | 30.03 | 1.97 | 2.02 | 0.14 | 0.09 |
| H-2''                                                                                                                                                                                                                                                                                                                                                                                                                                                                                                                                                           | 2.11 | 30.05 | 1.95 | 2.02 | 0.16 | 0.09 | 30.31 | 1.69 | 1.69 | 0.42 | 0.42 | 30.46 | 1.54 | 1.52 | 0.57 | 0.59 | 30.27 | 1.73 | 1.78 | 0.38 | 0.33 |
| H-2''                                                                                                                                                                                                                                                                                                                                                                                                                                                                                                                                                           | 2.11 | 30.04 | 1.96 | 2.03 | 0.15 | 0.08 | 30.03 | 1.97 | 1.96 | 0.14 | 0.15 | 30.11 | 1.89 | 1.86 | 0.22 | 0.25 | 30.22 | 1.78 | 1.84 | 0.33 | 0.27 |
| $\Delta 1 =  \delta(\text{calcd}) - \delta(\text{exptl}) $ , $\Delta 2 =  \delta(\text{scaled}) - \delta(\text{exptl}) $ ;<br><b>3A:</b> $Y = 1.0228X - 0.116$ , $R^2 = 0.9871$ , $\text{MAE} = 0.20$ ppm, $\text{CMAE} = 0.19$ ppm; <b>3B:</b> $Y = 1.0276X - 0.0477$ , $R^2 = 0.9738$ , $\text{MAE} = 0.30$ ppm, $\text{CMAE} = 0.30$ ppm;<br><b>3C:</b> $Y = 1.0205X - 0.0098$ , $R^2 = 0.9720$ , $\text{MAE} = 0.30$ ppm, $\text{CMAE} = 0.30$ ppm; <b>3D:</b> $Y = 1.0153X - 0.0818$ , $R^2 = 0.9898$ , $\text{MAE} = 0.20$ ppm, $\text{CMAE} = 0.20$ ppm; |      |       |      |      |      |      |       |      |      |      |      |       |      |      |      |      |       |      |      |      |      |

**Table S28.** Experimental chemical shifts of **3**, calculated shielding tensors and chemical shifts of isomers **3E–3H** in gas phase with TMS as reference at mPW1PW91/6-31G\* level.

| Nuclie | $\delta(\text{exptl})$ | 3E                    |                        |                         |            |            | 3F                    |                        |                         |            |            | 3G                    |                        |                         |            |            | 3H                    |                        |                         |            |            |
|--------|------------------------|-----------------------|------------------------|-------------------------|------------|------------|-----------------------|------------------------|-------------------------|------------|------------|-----------------------|------------------------|-------------------------|------------|------------|-----------------------|------------------------|-------------------------|------------|------------|
|        |                        | $\sigma_{\text{iso}}$ | $\delta(\text{calcd})$ | $\delta(\text{scaled})$ | $\Delta 1$ | $\Delta 2$ | $\sigma_{\text{iso}}$ | $\delta(\text{calcd})$ | $\delta(\text{scaled})$ | $\Delta 1$ | $\Delta 2$ | $\sigma_{\text{iso}}$ | $\delta(\text{calcd})$ | $\delta(\text{scaled})$ | $\Delta 1$ | $\Delta 2$ | $\sigma_{\text{iso}}$ | $\delta(\text{calcd})$ | $\delta(\text{scaled})$ | $\Delta 1$ | $\Delta 2$ |
| C-1    | 36.3                   | 155.4                 | 36.6                   | 35.3                    | 0.3        | 1.0        | 155.1                 | 36.9                   | 36.8                    | 0.6        | 0.5        | 155.0                 | 37.0                   | 36.9                    | 0.7        | 0.6        | 155.0                 | 37.0                   | 36.3                    | 0.7        | 0.0        |
| C-2    | 36.3                   | 154.2                 | 37.8                   | 36.6                    | 1.5        | 0.3        | 154.6                 | 37.4                   | 37.3                    | 1.1        | 1.0        | 154.6                 | 37.4                   | 37.4                    | 1.1        | 1.1        | 154.7                 | 37.3                   | 36.6                    | 1.0        | 0.3        |
| C-3    | 78.6                   | 116.3                 | 75.7                   | 77.7                    | 2.9        | 0.9        | 116.8                 | 75.2                   | 77.8                    | 3.4        | 0.8        | 116.9                 | 75.1                   | 77.7                    | 3.5        | 0.9        | 117.0                 | 75.0                   | 77.1                    | 3.6        | 1.5        |
| C-4    | 46.4                   | 138.7                 | 53.3                   | 53.5                    | 6.9        | 7.1        | 145.0                 | 47.0                   | 47.7                    | 0.6        | 1.3        | 145.0                 | 47.0                   | 47.6                    | 0.6        | 1.2        | 142.9                 | 49.1                   | 49.3                    | 2.7        | 2.9        |
| C-5    | 31.7                   | 153.8                 | 38.2                   | 37.1                    | 6.5        | 5.4        | 151.9                 | 40.1                   | 40.3                    | 8.4        | 8.6        | 151.7                 | 40.3                   | 40.5                    | 8.6        | 8.8        | 153.4                 | 38.6                   | 38.0                    | 6.9        | 6.3        |
| C-6    | 140.5                  | 56.8                  | 135.2                  | 142.1                   | 5.3        | 1.6        | 59.3                  | 132.7                  | 139.2                   | 7.8        | 1.3        | 60.7                  | 131.3                  | 137.7                   | 9.2        | 2.8        | 61.1                  | 130.9                  | 137.4                   | 9.6        | 3.1        |
| C-7    | 121.7                  | 74.9                  | 117.1                  | 122.6                   | 4.6        | 0.9        | 72.4                  | 119.6                  | 125.2                   | 2.1        | 3.5        | 71.8                  | 120.2                  | 125.9                   | 1.5        | 4.2        | 72.3                  | 119.7                  | 125.3                   | 2.0        | 3.6        |
| C-8    | 25.3                   | 163.1                 | 28.9                   | 27.0                    | 3.6        | 1.7        | 163.6                 | 28.4                   | 27.8                    | 3.1        | 2.5        | 163.0                 | 29.0                   | 28.3                    | 3.7        | 3.0        | 164.0                 | 28.0                   | 26.5                    | 2.7        | 1.2        |
| C-9    | 77.9                   | 118.5                 | 73.5                   | 75.3                    | 4.4        | 2.6        | 113.8                 | 78.2                   | 81.0                    | 0.3        | 3.1        | 113.6                 | 78.4                   | 81.2                    | 0.5        | 3.3        | 115.7                 | 76.3                   | 78.5                    | 1.6        | 0.6        |
| C-10   | 41.0                   | 152.2                 | 39.8                   | 38.8                    | 1.2        | 2.2        | 154.7                 | 37.3                   | 37.3                    | 3.7        | 3.7        | 154.7                 | 37.3                   | 37.3                    | 3.7        | 3.7        | 151.7                 | 40.3                   | 39.8                    | 0.7        | 1.2        |
| C-11   | 47.0                   | 145.3                 | 46.7                   | 46.3                    | 0.3        | 0.7        | 151.2                 | 40.8                   | 41.0                    | 6.2        | 6.0        | 150.0                 | 42.0                   | 42.3                    | 5.0        | 4.7        | 147.2                 | 44.8                   | 44.7                    | 2.2        | 2.3        |
| C-12   | 80.4                   | 114.7                 | 77.3                   | 79.4                    | 3.1        | 1.0        | 111.0                 | 81.0                   | 84.0                    | 0.6        | 3.6        | 111.1                 | 80.9                   | 83.8                    | 0.5        | 3.4        | 112.7                 | 79.3                   | 81.8                    | 1.1        | 1.4        |
| C-13   | 44.5                   | 147.4                 | 44.6                   | 44.0                    | 0.1        | 0.5        | 153.4                 | 38.6                   | 38.7                    | 5.9        | 5.8        | 153.4                 | 38.6                   | 38.6                    | 5.9        | 5.9        | 148.8                 | 43.2                   | 42.9                    | 1.3        | 1.6        |
| C-14   | 79.2                   | 110.5                 | 81.5                   | 84.0                    | 2.3        | 4.8        | 114.1                 | 77.9                   | 80.7                    | 1.3        | 1.5        | 113.9                 | 78.1                   | 80.9                    | 1.1        | 1.7        | 112.6                 | 79.4                   | 81.9                    | 0.2        | 2.7        |
| C-15   | 89.7                   | 106.7                 | 85.3                   | 88.0                    | 4.4        | 1.7        | 101.0                 | 91.0                   | 94.7                    | 1.3        | 5.0        | 101.2                 | 90.8                   | 94.5                    | 1.1        | 4.8        | 104.0                 | 88.0                   | 91.2                    | 1.7        | 1.5        |
| C-16   | 13.4                   | 178.5                 | 13.5                   | 10.3                    | 0.1        | 3.1        | 177.9                 | 14.1                   | 12.4                    | 0.7        | 1.0        | 178.0                 | 14.0                   | 12.4                    | 0.6        | 1.0        | 178.6                 | 13.4                   | 10.8                    | 0.0        | 2.6        |
| C-17   | 20.4                   | 165.7                 | 26.3                   | 24.2                    | 5.9        | 3.8        | 168.5                 | 23.5                   | 22.5                    | 3.1        | 2.1        | 168.5                 | 23.5                   | 22.5                    | 3.1        | 2.1        | 165.4                 | 26.6                   | 25.0                    | 6.2        | 4.6        |
| C-18   | 27.2                   | 164.2                 | 27.8                   | 25.8                    | 0.6        | 1.4        | 168.1                 | 23.9                   | 22.9                    | 3.3        | 4.3        | 173.5                 | 18.5                   | 17.1                    | 8.7        | 10.1       | 166.1                 | 25.9                   | 24.3                    | 1.3        | 2.9        |
| C-19   | 20.6                   | 165.5                 | 26.5                   | 24.4                    | 5.9        | 3.8        | 168.5                 | 23.5                   | 22.6                    | 2.9        | 2.0        | 164.5                 | 27.5                   | 26.7                    | 6.9        | 6.1        | 168.0                 | 24.0                   | 22.3                    | 3.4        | 1.7        |

|                                                                                                                                                                                                                                                                                                                                                                                                                                                                                  |                        |                       |                        |                         |            |            |                       |                        |                         |            |            |                       |                        |                         |            |            |                       |                        |                         |            |            |
|----------------------------------------------------------------------------------------------------------------------------------------------------------------------------------------------------------------------------------------------------------------------------------------------------------------------------------------------------------------------------------------------------------------------------------------------------------------------------------|------------------------|-----------------------|------------------------|-------------------------|------------|------------|-----------------------|------------------------|-------------------------|------------|------------|-----------------------|------------------------|-------------------------|------------|------------|-----------------------|------------------------|-------------------------|------------|------------|
| C-20                                                                                                                                                                                                                                                                                                                                                                                                                                                                             | 13.3                   | 178.3                 | 13.7                   | 10.5                    | 0.4        | 2.8        | 177.3                 | 14.7                   | 13.1                    | 1.4        | 0.2        | 177.5                 | 14.5                   | 12.9                    | 1.2        | 0.4        | 177.8                 | 14.2                   | 11.7                    | 0.9        | 1.6        |
| C-1'                                                                                                                                                                                                                                                                                                                                                                                                                                                                             | 165.4                  | 34.0                  | 158.0                  | 166.8                   | 7.4        | 1.4        | 34.5                  | 157.5                  | 165.7                   | 7.9        | 0.3        | 34.5                  | 157.5                  | 165.8                   | 7.9        | 0.4        | 33.6                  | 158.4                  | 167.0                   | 7.0        | 1.6        |
| C-2'                                                                                                                                                                                                                                                                                                                                                                                                                                                                             | 129.8                  | 69.0                  | 123.0                  | 129.0                   | 6.8        | 0.8        | 67.8                  | 124.2                  | 130.2                   | 5.6        | 0.4        | 68.2                  | 123.8                  | 129.7                   | 6.0        | 0.1        | 68.5                  | 123.5                  | 129.4                   | 6.3        | 0.4        |
| C-3',7'                                                                                                                                                                                                                                                                                                                                                                                                                                                                          | 129.5                  | 67.6                  | 124.4                  | 130.5                   | 5.1        | 1.0        | 66.5                  | 125.5                  | 131.6                   | 4.0        | 2.1        | 68.8                  | 123.2                  | 129.1                   | 6.3        | 0.4        | 68.2                  | 123.8                  | 129.7                   | 5.7        | 0.2        |
| C-3',7'                                                                                                                                                                                                                                                                                                                                                                                                                                                                          | 129.5                  | 66.5                  | 125.5                  | 131.7                   | 4.0        | 2.2        | 68.0                  | 124.0                  | 130.0                   | 5.5        | 0.5        | 66.6                  | 125.4                  | 131.4                   | 4.1        | 1.9        | 66.1                  | 125.9                  | 132.0                   | 3.6        | 2.5        |
| C-4',6'                                                                                                                                                                                                                                                                                                                                                                                                                                                                          | 128.5                  | 71.2                  | 120.8                  | 126.6                   | 7.7        | 1.9        | 70.8                  | 121.2                  | 126.9                   | 7.3        | 1.6        | 70.7                  | 121.3                  | 127.1                   | 7.2        | 1.4        | 71.1                  | 120.9                  | 126.6                   | 7.6        | 1.9        |
| C-4',6'                                                                                                                                                                                                                                                                                                                                                                                                                                                                          | 128.5                  | 71.2                  | 120.8                  | 126.6                   | 7.7        | 1.9        | 71.1                  | 120.9                  | 126.6                   | 7.6        | 1.9        | 70.6                  | 121.4                  | 127.2                   | 7.1        | 1.3        | 70.9                  | 121.1                  | 126.9                   | 7.4        | 1.6        |
| C-5'                                                                                                                                                                                                                                                                                                                                                                                                                                                                             | 133.2                  | 66.5                  | 125.5                  | 131.6                   | 7.7        | 1.6        | 66.8                  | 125.2                  | 131.2                   | 8.0        | 2.0        | 66.2                  | 125.8                  | 131.9                   | 7.4        | 1.3        | 66.4                  | 125.6                  | 131.6                   | 7.6        | 1.6        |
| C-1''                                                                                                                                                                                                                                                                                                                                                                                                                                                                            | 170.4                  | 32.2                  | 159.8                  | 168.8                   | 10.6       | 1.6        | 32.2                  | 159.8                  | 168.2                   | 10.6       | 2.2        | 31.4                  | 160.6                  | 169.1                   | 9.8        | 1.3        | 31.4                  | 160.6                  | 169.3                   | 9.8        | 1.1        |
| C-2''                                                                                                                                                                                                                                                                                                                                                                                                                                                                            | 21.0                   | 172.3                 | 19.7                   | 17.1                    | 1.3        | 3.9        | 172.7                 | 19.3                   | 18.0                    | 1.7        | 3.0        | 172.6                 | 19.4                   | 18.1                    | 1.6        | 2.9        | 172.5                 | 19.5                   | 17.4                    | 1.5        | 3.6        |
| C-1'''                                                                                                                                                                                                                                                                                                                                                                                                                                                                           | 171.3                  | 30.0                  | 162.0                  | 171.2                   | 9.3        | 0.1        | 30.6                  | 161.4                  | 170.0                   | 9.9        | 1.3        | 30.5                  | 161.5                  | 170.0                   | 9.8        | 1.3        | 30.3                  | 161.7                  | 170.6                   | 9.6        | 0.7        |
| C-2'''                                                                                                                                                                                                                                                                                                                                                                                                                                                                           | 20.9                   | 172.8                 | 19.2                   | 16.5                    | 1.7        | 4.4        | 172.9                 | 19.1                   | 17.8                    | 1.8        | 3.1        | 172.9                 | 19.1                   | 17.8                    | 1.8        | 3.1        | 172.8                 | 19.2                   | 17.1                    | 1.7        | 3.8        |
| $\Delta 1 =  \delta(\text{calcd}) - \delta(\text{exptl}) $ , $\Delta 2 =  \delta(\text{scaled}) - \delta(\text{exptl}) $ ;<br><b>3E:</b> $Y = 0.9232X + 3.9661$ , $R^2 = 0.9973$ , MAE = 4.2 ppm, CMAE = 2.2 ppm; <b>3F:</b> $Y = 0.9355X + 2.4288$ , $R^2 = 0.9965$ , MAE = 4.1 ppm, CMAE = 2.5 ppm;<br><b>3G:</b> $Y = 0.9355X + 2.4374$ , $R^2 = 0.9951$ , MAE = 4.4 ppm, CMAE = 2.7 ppm; <b>3H:</b> $Y = 0.9287X + 3.3127$ , $R^2 = 0.9978$ , MAE = 3.8 ppm, CMAE = 2.0 ppm. |                        |                       |                        |                         |            |            |                       |                        |                         |            |            |                       |                        |                         |            |            |                       |                        |                         |            |            |
| <b>3E</b>                                                                                                                                                                                                                                                                                                                                                                                                                                                                        |                        |                       |                        |                         |            |            |                       |                        |                         |            |            |                       |                        |                         |            |            |                       |                        |                         |            |            |
| <b>3F</b>                                                                                                                                                                                                                                                                                                                                                                                                                                                                        |                        |                       |                        |                         |            |            |                       |                        |                         |            |            |                       |                        |                         |            |            |                       |                        |                         |            |            |
| <b>3G</b>                                                                                                                                                                                                                                                                                                                                                                                                                                                                        |                        |                       |                        |                         |            |            |                       |                        |                         |            |            |                       |                        |                         |            |            |                       |                        |                         |            |            |
| <b>3H</b>                                                                                                                                                                                                                                                                                                                                                                                                                                                                        |                        |                       |                        |                         |            |            |                       |                        |                         |            |            |                       |                        |                         |            |            |                       |                        |                         |            |            |
| Nuclie                                                                                                                                                                                                                                                                                                                                                                                                                                                                           | $\delta(\text{exptl})$ | $\sigma_{\text{iso}}$ | $\delta(\text{calcd})$ | $\delta(\text{scaled})$ | $\Delta 1$ | $\Delta 2$ | $\sigma_{\text{iso}}$ | $\delta(\text{calcd})$ | $\delta(\text{scaled})$ | $\Delta 1$ | $\Delta 2$ | $\sigma_{\text{iso}}$ | $\delta(\text{calcd})$ | $\delta(\text{scaled})$ | $\Delta 1$ | $\Delta 2$ | $\sigma_{\text{iso}}$ | $\delta(\text{calcd})$ | $\delta(\text{scaled})$ | $\Delta 1$ | $\Delta 2$ |
| H-1a                                                                                                                                                                                                                                                                                                                                                                                                                                                                             | 1.90                   | 30.09                 | 1.91                   | 1.92                    | 0.01       | 0.02       | 30.29                 | 1.71                   | 1.77                    | 0.19       | 0.13       | 30.27                 | 1.73                   | 1.77                    | 0.17       | 0.13       | 29.98                 | 2.02                   | 2.04                    | 0.12       | 0.14       |
| H-1b                                                                                                                                                                                                                                                                                                                                                                                                                                                                             | 1.94                   | 30.15                 | 1.85                   | 1.86                    | 0.09       | 0.08       | 29.99                 | 2.01                   | 2.06                    | 0.07       | 0.12       | 29.98                 | 2.02                   | 2.06                    | 0.08       | 0.12       | 30.04                 | 1.96                   | 1.99                    | 0.02       | 0.05       |
| H-2                                                                                                                                                                                                                                                                                                                                                                                                                                                                              | 2.09                   | 30.07                 | 1.93                   | 1.94                    | 0.16       | 0.15       | 29.99                 | 2.01                   | 2.06                    | 0.08       | 0.03       | 30.01                 | 1.99                   | 2.02                    | 0.10       | 0.07       | 30.14                 | 1.86                   | 1.89                    | 0.23       | 0.20       |
| H-3                                                                                                                                                                                                                                                                                                                                                                                                                                                                              | 5.50                   | 26.22                 | 5.78                   | 5.72                    | 0.28       | 0.22       | 26.55                 | 5.45                   | 5.41                    | 0.05       | 0.09       | 26.56                 | 5.44                   | 5.41                    | 0.06       | 0.09       | 26.33                 | 5.67                   | 5.64                    | 0.17       | 0.14       |
| H-4                                                                                                                                                                                                                                                                                                                                                                                                                                                                              | 2.29                   | 29.60                 | 2.40                   | 2.40                    | 0.11       | 0.11       | 30.04                 | 1.96                   | 2.01                    | 0.33       | 0.28       | 30.04                 | 1.96                   | 2.00                    | 0.33       | 0.29       | 29.89                 | 2.11                   | 2.14                    | 0.18       | 0.15       |
| H-5                                                                                                                                                                                                                                                                                                                                                                                                                                                                              | 2.90                   | 29.33                 | 2.67                   | 2.67                    | 0.23       | 0.23       | 29.62                 | 2.38                   | 2.42                    | 0.52       | 0.48       | 29.54                 | 2.46                   | 2.49                    | 0.44       | 0.41       | 29.18                 | 2.82                   | 2.83                    | 0.08       | 0.07       |
| H-7                                                                                                                                                                                                                                                                                                                                                                                                                                                                              | 5.04                   | 26.95                 | 5.05                   | 5.01                    | 0.01       | 0.03       | 26.71                 | 5.29                   | 5.25                    | 0.25       | 0.21       | 26.70                 | 5.30                   | 5.28                    | 0.26       | 0.24       | 26.79                 | 5.21                   | 5.19                    | 0.17       | 0.15       |
| H-8a                                                                                                                                                                                                                                                                                                                                                                                                                                                                             | 1.92                   | 29.01                 | 2.99                   | 2.99                    | 1.07       | 1.07       | 30.36                 | 1.64                   | 1.70                    | 0.28       | 0.22       | 30.58                 | 1.42                   | 1.46                    | 0.50       | 0.46       | 29.90                 | 2.10                   | 2.13                    | 0.18       | 0.21       |
| H-8b                                                                                                                                                                                                                                                                                                                                                                                                                                                                             | 1.55                   | 30.02                 | 1.98                   | 2.00                    | 0.43       | 0.45       | 30.27                 | 1.73                   | 1.78                    | 0.18       | 0.23       | 29.93                 | 2.07                   | 2.11                    | 0.52       | 0.56       | 29.96                 | 2.04                   | 2.07                    | 0.49       | 0.52       |
| H-9                                                                                                                                                                                                                                                                                                                                                                                                                                                                              | 4.18                   | 27.33                 | 4.67                   | 4.63                    | 0.49       | 0.45       | 27.66                 | 4.34                   | 4.33                    | 0.16       | 0.15       | 27.73                 | 4.27                   | 4.26                    | 0.09       | 0.08       | 27.51                 | 4.49                   | 4.48                    | 0.31       | 0.30       |
| H-11                                                                                                                                                                                                                                                                                                                                                                                                                                                                             | 1.23                   | 30.55                 | 1.45                   | 1.47                    | 0.22       | 0.24       | 28.82                 | 3.18                   | 3.19                    | 1.95       | 1.96       | 29.17                 | 2.83                   | 2.85                    | 1.60       | 1.62       | 30.40                 | 1.60                   | 1.64                    | 0.37       | 0.41       |
| H-12                                                                                                                                                                                                                                                                                                                                                                                                                                                                             | 3.80                   | 27.43                 | 4.57                   | 4.53                    | 0.77       | 0.73       | 27.88                 | 4.12                   | 4.12                    | 0.32       | 0.32       | 27.96                 | 4.04                   | 4.03                    | 0.24       | 0.23       | 27.97                 | 4.03                   | 4.03                    | 0.23       | 0.23       |
| H-13                                                                                                                                                                                                                                                                                                                                                                                                                                                                             | 2.21                   | 29.92                 | 2.08                   | 2.09                    | 0.13       | 0.12       | 29.63                 | 2.37                   | 2.41                    | 0.16       | 0.20       | 29.58                 | 2.42                   | 2.44                    | 0.21       | 0.23       | 29.80                 | 2.20                   | 2.23                    | 0.01       | 0.02       |
| H-14                                                                                                                                                                                                                                                                                                                                                                                                                                                                             | 5.06                   | 27.02                 | 4.98                   | 4.94                    | 0.08       | 0.12       | 26.91                 | 5.09                   | 5.06                    | 0.03       | 0.00       | 26.94                 | 5.06                   | 5.04                    | 0.00       | 0.02       | 26.97                 | 5.03                   | 5.01                    | 0.03       | 0.05       |
| H-16                                                                                                                                                                                                                                                                                                                                                                                                                                                                             | 0.94                   | 31.43                 | 0.57                   | 0.61                    | 0.37       | 0.33       | 30.97                 | 1.03                   | 1.10                    | 0.09       | 0.16       | 31.15                 | 0.85                   | 0.90                    | 0.09       | 0.04       | 31.11                 | 0.89                   | 0.94                    | 0.05       | 0.00       |
| H-16                                                                                                                                                                                                                                                                                                                                                                                                                                                                             | 0.94                   | 31.32                 | 0.68                   | 0.71                    | 0.26       | 0.23       | 31.13                 | 0.87                   | 0.95                    | 0.07       | 0.01       | 31.21                 | 0.79                   | 0.85                    | 0.15       | 0.09       | 31.22                 | 0.78                   | 0.83                    | 0.16       | 0.11       |
| H-16                                                                                                                                                                                                                                                                                                                                                                                                                                                                             | 0.94                   | 30.90                 | 1.10                   | 1.13                    | 0.16       | 0.19       | 31.19                 | 0.81                   | 0.88                    | 0.13       | 0.06       | 30.97                 | 1.03                   | 1.08                    | 0.09       | 0.14       | 31.25                 | 0.75                   | 0.80                    | 0.19       | 0.14       |
| H-17                                                                                                                                                                                                                                                                                                                                                                                                                                                                             | 1.70                   | 30.05                 | 1.95                   | 1.96                    | 0.25       | 0.26       | 30.53                 | 1.47                   | 1.53                    | 0.23       | 0.17       | 30.20                 | 1.80                   | 1.84                    | 0.10       | 0.14       | 30.06                 | 1.94                   | 1.97                    | 0.24       | 0.27       |
| H-17                                                                                                                                                                                                                                                                                                                                                                                                                                                                             | 1.70                   | 30.68                 | 1.32                   | 1.34                    | 0.38       | 0.36       | 30.21                 | 1.79                   | 1.85                    | 0.09       | 0.15       | 30.67                 | 1.33                   | 1.38                    | 0.37       | 0.32       | 30.57                 | 1.43                   | 1.47                    | 0.27       | 0.23       |
| H-17                                                                                                                                                                                                                                                                                                                                                                                                                                                                             | 1.70                   | 30.84                 | 1.16                   | 1.19                    | 0.54       | 0.51       | 30.69                 | 1.31                   | 1.38                    | 0.39       | 0.32       | 30.52                 | 1.48                   | 1.52                    | 0.22       | 0.18       | 30.58                 | 1.42                   | 1.46                    | 0.28       | 0.24       |
| H-18                                                                                                                                                                                                                                                                                                                                                                                                                                                                             | 0.84                   | 30.49                 | 1.51                   | 1.53                    | 0.67       | 0.69       | 30.74                 | 1.26                   | 1.33                    | 0.42       | 0.49       | 30.63                 | 1.37                   | 1.42                    | 0.53       | 0.58       | 31.30                 | 0.70                   | 0.75                    | 0.14       | 0.09       |
| H-18                                                                                                                                                                                                                                                                                                                                                                                                                                                                             | 0.84                   | 31.34                 | 0.66                   | 0.70                    | 0.18       | 0.14       | 31.38                 | 0.62                   | 0.70                    | 0.22       | 0.14       | 31.46                 | 0.54                   | 0.61                    | 0.30       | 0.23       | 30.82                 | 1.18                   | 1.22                    | 0.34       | 0.38       |
| H-18                                                                                                                                                                                                                                                                                                                                                                                                                                                                             | 0.84                   | 31.29                 | 0.71                   | 0.74                    | 0.13       | 0.10       | 31.44                 | 0.56                   | 0.64                    | 0.28       | 0.20       | 31.09                 | 0.91                   | 0.96                    | 0.07       | 0.12       | 31.21                 | 0.79                   | 0.84                    | 0.05       | 0.00       |
| H-19                                                                                                                                                                                                                                                                                                                                                                                                                                                                             | 1.01                   | 31.64                 | 0.36                   | 0.40                    | 0.65       | 0.61       | 31.26                 | 0.74                   | 0.82                    | 0.27       | 0.19       | 31.36                 | 0.64                   | 0.70                    | 0.37       | 0.31       | 31.11                 | 0.89                   | 0.94                    | 0.12       | 0.07       |
| H-19                                                                                                                                                                                                                                                                                                                                                                                                                                                                             | 1.01                   | 31.26                 | 0.74                   | 0.77                    | 0.27       | 0.24       | 31.46                 | 0.54                   | 0.63                    | 0.47       | 0.38       | 31.14                 | 0.86                   | 0.91                    | 0.15       | 0.10       | 31.61                 | 0.39                   | 0.45                    | 0.62       | 0.56       |
| H-19                                                                                                                                                                                                                                                                                                                                                                                                                                                                             | 1.01                   | 30.66                 | 1.34                   | 1.36                    | 0.33       | 0.35       | 30.71                 | 1.29                   | 1.36                    | 0.28       | 0.35       | 31.15                 | 0.85                   | 0.91                    | 0.16       | 0.10       | 30.30                 | 1.70                   | 1.74                    | 0.69       | 0.73       |
| H-20                                                                                                                                                                                                                                                                                                                                                                                                                                                                             | 0.99                   | 31.08                 | 0.92                   | 0.95                    | 0.07       | 0.04       | 30.69                 | 1.31                   | 1.38                    | 0.32       | 0.39       | 30.72                 | 1.28                   | 1.32                    | 0.29       | 0.33       | 31.12                 | 0.88                   | 0.93                    | 0.11       | 0.06       |
| H-20                                                                                                                                                                                                                                                                                                                                                                                                                                                                             | 0.99                   | 31.08                 | 0.92                   | 0.95                    | 0.07       | 0.04       | 31.18                 | 0.82                   | 0.90                    | 0.17       | 0.09       | 31.20                 | 0.80                   | 0.86                    | 0.19       | 0.13       | 30.81                 | 1.19                   | 1.24                    | 0.20       | 0.25       |
| H-20                                                                                                                                                                                                                                                                                                                                                                                                                                                                             | 0.99                   | 30.82                 | 1.18                   | 1.20                    | 0.19       | 0.21       | 31.10                 | 0.90                   | 0.98                    | 0.09       | 0.01       | 31.12                 | 0.88                   | 0.93                    | 0.11       | 0.06       | 31.13                 | 0.87                   | 0.92                    | 0.12       | 0.07       |
| H-3',7'                                                                                                                                                                                                                                                                                                                                                                                                                                                                          | 7.99                   | 23.90                 | 8.10                   | 8.00                    | 0.11       | 0.01       | 23.83                 | 8.17                   | 8.07                    | 0.18       | 0.08       | 23.62                 | 8.38                   | 8.30                    | 0.39       | 0.31       | 23.90                 | 8.10                   | 8.04                    | 0.11       | 0.05       |
| H-3',7'                                                                                                                                                                                                                                                                                                                                                                                                                                                                          | 7.99                   | 23.85                 | 8.15                   | 8.06                    | 0.16       | 0.07       | 23.51                 | 8.49                   | 8.38                    | 0.50       | 0.39       | 23.85                 | 8.15                   | 8.07                    | 0.16       | 0.08       | 23.84                 | 8.16                   | 8.10                    | 0.17       | 0.11       |
| H-4',6'                                                                                                                                                                                                                                                                                                                                                                                                                                                                          | 7.37                   | 24.76                 | 7.24                   | 7.16                    | 0.13       | 0.21       | 24.64                 | 7.36                   | 7.28                    | 0.01       | 0.09       | 24.64                 | 7.36                   | 7.30                    | 0.01       | 0.07       | 24.71                 | 7.29                   | 7.24                    | 0.08       | 0.13       |
| H-4',6'                                                                                                                                                                                                                                                                                                                                                                                                                                                                          | 7.37                   | 24.65                 | 7.35                   | 7.26                    | 0.02       | 0.11       | 24.61                 | 7.39                   | 7.30                    | 0.02       | 0.07       | 24.63                 | 7.37                   | 7.31                    | 0.00       | 0.06       | 24.65                 | 7.35                   | 7.30                    | 0.02       | 0.07       |
| H-5'                                                                                                                                                                                                                                                                                                                                                                                                                                                                             | 7.49                   | 24.61                 | 7.39                   | 7.31                    | 0.10       | 0.18       | 24.59                 | 7.41                   | 7.32                    | 0.08       | 0.17       | 24.54                 | 7.46                   | 7.39                    | 0.03       | 0.10       | 24.59                 | 7.41                   | 7.35                    | 0.08       | 0.14       |
| H-2''                                                                                                                                                                                                                                                                                                                                                                                                                                                                            | 1.90                   | 30.15                 | 1.85                   | 1.86                    | 0.05       | 0.04       | 30.51                 | 1.49                   | 1.56                    | 0.41       | 0.34       | 30.24                 | 1.76                   | 1.80                    | 0.14       | 0.10       | 30.39                 | 1.61                   | 1.65                    | 0.29       | 0.25       |
| H-2''                                                                                                                                                                                                                                                                                                                                                                                                                                                                            | 1.90                   | 30.52                 | 1.48                   | 1.50                    | 0.42       | 0.40       | 30.67                 | 1.33                   | 1.39                    | 0.57       | 0.51       | 30.67                 | 1.33                   | 1.38                    | 0.57       | 0.52       | 30.27                 | 1.73                   | 1.76                    | 0.17       | 0.14       |

|                                                                                                                                                                                                                                                                                                                                                                                                                                                                                         |      |       |      |      |      |      |       |      |      |      |      |       |      |      |      |      |       |      |      |      |      |
|-----------------------------------------------------------------------------------------------------------------------------------------------------------------------------------------------------------------------------------------------------------------------------------------------------------------------------------------------------------------------------------------------------------------------------------------------------------------------------------------|------|-------|------|------|------|------|-------|------|------|------|------|-------|------|------|------|------|-------|------|------|------|------|
| H-2''                                                                                                                                                                                                                                                                                                                                                                                                                                                                                   | 1.90 | 30.11 | 1.89 | 1.90 | 0.01 | 0.00 | 30.67 | 1.33 | 1.40 | 0.57 | 0.50 | 30.27 | 1.73 | 1.77 | 0.17 | 0.13 | 30.55 | 1.45 | 1.49 | 0.45 | 0.41 |
| H-2'''                                                                                                                                                                                                                                                                                                                                                                                                                                                                                  | 2.11 | 30.01 | 1.99 | 2.00 | 0.12 | 0.11 | 30.05 | 1.95 | 1.99 | 0.16 | 0.12 | 30.06 | 1.94 | 1.97 | 0.17 | 0.14 | 30.14 | 1.86 | 1.89 | 0.25 | 0.22 |
| H-2''''                                                                                                                                                                                                                                                                                                                                                                                                                                                                                 | 2.11 | 30.04 | 1.96 | 1.98 | 0.15 | 0.13 | 30.03 | 1.97 | 2.01 | 0.14 | 0.10 | 30.03 | 1.97 | 2.00 | 0.14 | 0.11 | 30.03 | 1.97 | 2.00 | 0.14 | 0.11 |
| H-2'''''                                                                                                                                                                                                                                                                                                                                                                                                                                                                                | 2.11 | 30.45 | 1.55 | 1.57 | 0.56 | 0.54 | 30.47 | 1.53 | 1.59 | 0.58 | 0.52 | 30.47 | 1.53 | 1.57 | 0.58 | 0.54 | 30.33 | 1.67 | 1.70 | 0.44 | 0.41 |
| $\Delta 1 =  \delta(\text{calcd}) - \delta(\text{exptl}) $ , $\Delta 2 =  \delta(\text{scaled}) - \delta(\text{exptl}) $ ;<br><b>3E:</b> $Y = 1.0182X - 0.0468$ , $R^2 = 0.9765$ , MAE = 0.30 ppm, CMAE = 0.30 ppm; <b>3F:</b> $Y = 1.0253X - 0.0994$ , $R^2 = 0.9672$ , MAE = 0.30 ppm, CMAE = 0.30 ppm;<br><b>3G:</b> $Y = 1.0189X - 0.0742$ , $R^2 = 0.9739$ , MAE = 0.30 ppm, CMAE = 0.20 ppm; <b>3H:</b> $Y = 1.0157X - 0.061$ , $R^2 = 0.9869$ , MAE = 0.20 ppm, CMAE = 0.20 ppm; |      |       |      |      |      |      |       |      |      |      |      |       |      |      |      |      |       |      |      |      |      |

**Table S29.** Experimental chemical shifts of **3**, calculated shielding tensors and chemical shifts of isomers **3A–3D** in chloroform with TMS as reference at mPW1PW91/6-31G\*\* level.

| Nuclie                                                                                                                                                                                                                                                                                                                                                                                                                                                                          | $\delta(\text{exptl})$ | 3A    |                        |                         |            |            | 3B    |                        |                         |            |            | 3C    |                        |                         |            |            | 3D    |                        |                         |            |            |
|---------------------------------------------------------------------------------------------------------------------------------------------------------------------------------------------------------------------------------------------------------------------------------------------------------------------------------------------------------------------------------------------------------------------------------------------------------------------------------|------------------------|-------|------------------------|-------------------------|------------|------------|-------|------------------------|-------------------------|------------|------------|-------|------------------------|-------------------------|------------|------------|-------|------------------------|-------------------------|------------|------------|
|                                                                                                                                                                                                                                                                                                                                                                                                                                                                                 |                        | oiso  | $\delta(\text{calcd})$ | $\delta(\text{scaled})$ | $\Delta 1$ | $\Delta 2$ | oiso  | $\delta(\text{calcd})$ | $\delta(\text{scaled})$ | $\Delta 1$ | $\Delta 2$ | oiso  | $\delta(\text{calcd})$ | $\delta(\text{scaled})$ | $\Delta 1$ | $\Delta 2$ | oiso  | $\delta(\text{calcd})$ | $\delta(\text{scaled})$ | $\Delta 1$ | $\Delta 2$ |
| C-1                                                                                                                                                                                                                                                                                                                                                                                                                                                                             | 36.3                   | 158.1 | 33.9                   | 36.1                    | 2.4        | 0.2        | 156.4 | 35.6                   | 36.6                    | 0.7        | 0.3        | 156.4 | 35.6                   | 35.8                    | 0.7        | 0.5        | 157.9 | 34.1                   | 36.3                    | 2.2        | 0.0        |
| C-2                                                                                                                                                                                                                                                                                                                                                                                                                                                                             | 36.3                   | 157.0 | 35.0                   | 37.3                    | 1.3        | 1.0        | 157.0 | 35.0                   | 36.0                    | 1.3        | 0.3        | 156.5 | 35.5                   | 35.7                    | 0.8        | 0.6        | 157.0 | 35.0                   | 37.2                    | 1.3        | 0.9        |
| C-3                                                                                                                                                                                                                                                                                                                                                                                                                                                                             | 78.6                   | 117.1 | 74.9                   | 78.6                    | 3.7        | 0.0        | 113.2 | 78.8                   | 82.0                    | 0.2        | 3.4        | 114.4 | 77.6                   | 80.3                    | 1.0        | 1.7        | 117.0 | 75.0                   | 78.8                    | 3.6        | 0.2        |
| C-4                                                                                                                                                                                                                                                                                                                                                                                                                                                                             | 46.4                   | 148.1 | 43.9                   | 46.5                    | 2.5        | 0.1        | 147.0 | 45.0                   | 46.5                    | 1.4        | 0.1        | 145.5 | 46.5                   | 47.4                    | 0.1        | 1.0        | 147.8 | 44.2                   | 46.8                    | 2.2        | 0.4        |
| C-5                                                                                                                                                                                                                                                                                                                                                                                                                                                                             | 31.7                   | 161.2 | 30.8                   | 32.9                    | 0.9        | 1.2        | 158.2 | 33.8                   | 34.7                    | 2.1        | 3.0        | 156.0 | 36.0                   | 36.2                    | 4.3        | 4.5        | 160.8 | 31.2                   | 33.3                    | 0.5        | 1.6        |
| C-6                                                                                                                                                                                                                                                                                                                                                                                                                                                                             | 140.5                  | 53.2  | 138.8                  | 144.8                   | 1.7        | 4.3        | 60.9  | 131.1                  | 137.0                   | 9.4        | 3.5        | 57.9  | 134.1                  | 140.3                   | 6.4        | 0.2        | 54.7  | 137.3                  | 143.6                   | 3.2        | 3.1        |
| C-7                                                                                                                                                                                                                                                                                                                                                                                                                                                                             | 121.7                  | 73.3  | 118.7                  | 124.0                   | 3.0        | 2.3        | 72.3  | 119.7                  | 125.0                   | 2.0        | 3.3        | 72.8  | 119.2                  | 124.5                   | 2.5        | 2.8        | 73.7  | 118.3                  | 123.8                   | 3.4        | 2.1        |
| C-8                                                                                                                                                                                                                                                                                                                                                                                                                                                                             | 25.3                   | 165.0 | 27.0                   | 29.0                    | 1.7        | 3.7        | 161.5 | 30.5                   | 31.2                    | 5.2        | 5.9        | 162.6 | 29.4                   | 29.2                    | 4.1        | 3.9        | 167.6 | 24.4                   | 26.3                    | 0.9        | 1.0        |
| C-9                                                                                                                                                                                                                                                                                                                                                                                                                                                                             | 77.9                   | 118.0 | 74.0                   | 77.7                    | 3.9        | 0.2        | 116.9 | 75.1                   | 78.1                    | 2.8        | 0.2        | 117.5 | 74.5                   | 77.0                    | 3.4        | 0.9        | 117.5 | 74.5                   | 78.3                    | 3.4        | 0.4        |
| C-10                                                                                                                                                                                                                                                                                                                                                                                                                                                                            | 41.0                   | 150.5 | 41.5                   | 44.0                    | 0.5        | 3.0        | 155.9 | 36.1                   | 37.2                    | 4.9        | 3.8        | 154.2 | 37.8                   | 38.2                    | 3.2        | 2.8        | 151.5 | 40.5                   | 42.9                    | 0.5        | 1.9        |
| C-11                                                                                                                                                                                                                                                                                                                                                                                                                                                                            | 47.0                   | 142.5 | 49.5                   | 52.3                    | 2.5        | 5.3        | 144.5 | 47.5                   | 49.1                    | 0.5        | 2.1        | 144.1 | 47.9                   | 48.9                    | 0.9        | 1.9        | 147.1 | 44.9                   | 47.5                    | 2.1        | 0.5        |
| C-12                                                                                                                                                                                                                                                                                                                                                                                                                                                                            | 80.4                   | 115.9 | 76.1                   | 79.8                    | 4.3        | 0.6        | 114.5 | 77.5                   | 80.6                    | 2.9        | 0.2        | 112.7 | 79.3                   | 82.2                    | 1.1        | 1.8        | 116.3 | 75.7                   | 79.6                    | 4.7        | 0.8        |
| C-13                                                                                                                                                                                                                                                                                                                                                                                                                                                                            | 44.5                   | 149.1 | 42.9                   | 45.5                    | 1.6        | 1.0        | 153.6 | 38.4                   | 39.6                    | 6.1        | 4.9        | 153.9 | 38.1                   | 38.4                    | 6.4        | 6.1        | 149.1 | 42.9                   | 45.5                    | 1.6        | 1.0        |
| C-14                                                                                                                                                                                                                                                                                                                                                                                                                                                                            | 79.2                   | 115.2 | 76.8                   | 80.6                    | 2.4        | 1.4        | 114.6 | 77.4                   | 80.5                    | 1.8        | 1.3        | 114.6 | 77.4                   | 80.1                    | 1.8        | 0.9        | 115.1 | 76.9                   | 80.8                    | 2.3        | 1.6        |
| C-15                                                                                                                                                                                                                                                                                                                                                                                                                                                                            | 89.7                   | 104.6 | 87.4                   | 91.6                    | 2.3        | 1.9        | 102.7 | 89.3                   | 93.0                    | 0.4        | 3.3        | 103.4 | 88.6                   | 92.0                    | 1.1        | 2.3        | 104.5 | 87.5                   | 91.8                    | 2.2        | 2.1        |
| C-16                                                                                                                                                                                                                                                                                                                                                                                                                                                                            | 13.4                   | 181.2 | 10.8                   | 12.2                    | 2.6        | 1.2        | 180.1 | 11.9                   | 11.7                    | 1.5        | 1.7        | 180.1 | 11.9                   | 10.7                    | 1.5        | 2.7        | 181.1 | 10.9                   | 12.1                    | 2.5        | 1.3        |
| C-17                                                                                                                                                                                                                                                                                                                                                                                                                                                                            | 20.4                   | 173.4 | 18.6                   | 20.2                    | 1.8        | 0.2        | 167.5 | 24.5                   | 25.0                    | 4.1        | 4.6        | 166.0 | 26.0                   | 25.7                    | 5.6        | 5.3        | 173.1 | 18.9                   | 20.5                    | 1.5        | 0.1        |
| C-18                                                                                                                                                                                                                                                                                                                                                                                                                                                                            | 27.2                   | 169.0 | 23.0                   | 24.8                    | 4.2        | 2.4        | 165.5 | 26.5                   | 27.0                    | 0.7        | 0.2        | 167.7 | 24.3                   | 23.8                    | 2.9        | 3.4        | 168.2 | 23.8                   | 25.6                    | 3.4        | 1.6        |
| C-19                                                                                                                                                                                                                                                                                                                                                                                                                                                                            | 20.6                   | 179.7 | 12.3                   | 13.7                    | 8.3        | 6.9        | 173.5 | 18.5                   | 18.6                    | 2.1        | 2.0        | 167.2 | 24.8                   | 24.3                    | 4.2        | 3.7        | 174.5 | 17.5                   | 19.1                    | 3.1        | 1.5        |
| C-20                                                                                                                                                                                                                                                                                                                                                                                                                                                                            | 13.3                   | 180.8 | 11.2                   | 12.6                    | 2.1        | 0.7        | 179.8 | 12.2                   | 12.0                    | 1.1        | 1.3        | 178.0 | 14.0                   | 12.9                    | 0.7        | 0.4        | 180.7 | 11.3                   | 12.6                    | 2.0        | 0.7        |
| C-1'                                                                                                                                                                                                                                                                                                                                                                                                                                                                            | 165.4                  | 34.1  | 157.9                  | 164.6                   | 7.5        | 0.8        | 32.9  | 159.1                  | 166.5                   | 6.3        | 1.1        | 33.5  | 158.5                  | 166.1                   | 6.9        | 0.7        | 34.1  | 157.9                  | 165.0                   | 7.5        | 0.4        |
| C-2'                                                                                                                                                                                                                                                                                                                                                                                                                                                                            | 129.8                  | 69.2  | 122.8                  | 128.2                   | 7.0        | 1.6        | 68.3  | 123.7                  | 129.2                   | 6.1        | 0.6        | 68.7  | 123.3                  | 128.8                   | 6.5        | 1.0        | 69.3  | 122.7                  | 128.4                   | 7.1        | 1.4        |
| C-3',7'                                                                                                                                                                                                                                                                                                                                                                                                                                                                         | 129.5                  | 67.2  | 124.8                  | 130.4                   | 4.7        | 0.9        | 68.4  | 123.6                  | 129.1                   | 5.9        | 0.4        | 68.9  | 123.1                  | 128.6                   | 6.4        | 0.9        | 67.1  | 124.9                  | 130.7                   | 4.6        | 1.2        |
| C-3',7'                                                                                                                                                                                                                                                                                                                                                                                                                                                                         | 129.5                  | 69.6  | 122.4                  | 127.8                   | 7.1        | 1.7        | 67.5  | 124.5                  | 130.1                   | 5.0        | 0.6        | 67.5  | 124.5                  | 130.0                   | 5.0        | 0.5        | 69.7  | 122.3                  | 127.9                   | 7.2        | 1.6        |
| C-4',6'                                                                                                                                                                                                                                                                                                                                                                                                                                                                         | 128.5                  | 70.6  | 121.4                  | 126.8                   | 7.1        | 1.7        | 70.5  | 121.5                  | 126.9                   | 7.0        | 1.6        | 70.7  | 121.3                  | 126.7                   | 7.2        | 1.8        | 70.6  | 121.4                  | 127.0                   | 7.1        | 1.5        |
| C-4',6'                                                                                                                                                                                                                                                                                                                                                                                                                                                                         | 128.5                  | 70.7  | 121.3                  | 126.7                   | 7.2        | 1.8        | 70.8  | 121.2                  | 126.6                   | 7.3        | 1.9        | 70.7  | 121.3                  | 126.7                   | 7.2        | 1.8        | 70.7  | 121.3                  | 127.0                   | 7.2        | 1.5        |
| C-5'                                                                                                                                                                                                                                                                                                                                                                                                                                                                            | 133.2                  | 65.7  | 126.3                  | 131.9                   | 6.9        | 1.3        | 65.7  | 126.3                  | 132.0                   | 6.9        | 1.2        | 65.7  | 126.3                  | 132.0                   | 6.9        | 1.2        | 65.7  | 126.3                  | 132.2                   | 6.9        | 1.0        |
| C-1''                                                                                                                                                                                                                                                                                                                                                                                                                                                                           | 170.4                  | 29.6  | 162.4                  | 169.3                   | 8.0        | 1.1        | 28.7  | 163.3                  | 170.9                   | 7.1        | 0.5        | 29.0  | 163.0                  | 170.9                   | 7.4        | 0.5        | 29.9  | 162.1                  | 169.4                   | 8.3        | 1.0        |
| C-2''                                                                                                                                                                                                                                                                                                                                                                                                                                                                           | 21.0                   | 174.0 | 18.0                   | 19.6                    | 3.0        | 1.4        | 174.2 | 17.8                   | 17.9                    | 3.2        | 3.1        | 173.0 | 19.0                   | 18.2                    | 2.0        | 2.8        | 174.1 | 17.9                   | 19.4                    | 3.1        | 1.6        |
| C-1'''                                                                                                                                                                                                                                                                                                                                                                                                                                                                          | 171.3                  | 28.4  | 163.6                  | 170.5                   | 7.7        | 0.8        | 28.7  | 163.3                  | 170.9                   | 8.0        | 0.4        | 28.8  | 163.2                  | 171.1                   | 8.1        | 0.2        | 28.5  | 163.5                  | 170.8                   | 7.8        | 0.5        |
| C-2'''                                                                                                                                                                                                                                                                                                                                                                                                                                                                          | 20.9                   | 174.3 | 17.7                   | 19.4                    | 3.2        | 1.5        | 174.3 | 17.7                   | 17.8                    | 3.2        | 3.1        | 174.3 | 17.7                   | 16.8                    | 3.2        | 4.1        | 174.2 | 17.8                   | 19.4                    | 3.1        | 1.5        |
| $\Delta 1 =  \delta(\text{calcd}) - \delta(\text{exptl}) $ , $\Delta 2 =  \delta(\text{scaled}) - \delta(\text{exptl}) $ ;<br><b>3A:</b> $Y = 0.9649X - 0.9534$ , $R^2 = 0.9981$ , MAE = 4.0 ppm, CMAE = 1.7 ppm; <b>3B:</b> $Y = 0.951X + 0.7786$ , $R^2 = 0.9977$ , MAE = 3.8 ppm, CMAE = 1.9 ppm;<br><b>3C:</b> $Y = 0.9428X + 1.8547$ , $R^2 = 0.9976$ , MAE = 3.9 ppm, CMAE = 2.0 ppm; <b>3D:</b> $Y = 0.9622X - 0.8335$ , $R^2 = 0.9993$ , MAE = 3.8 ppm, CMAE = 1.2 ppm. |                        |       |                        |                         |            |            |       |                        |                         |            |            |       |                        |                         |            |            |       |                        |                         |            |            |
| Nuclie                                                                                                                                                                                                                                                                                                                                                                                                                                                                          | $\delta(\text{exptl})$ | 3A    |                        |                         |            |            | 3B    |                        |                         |            |            | 3C    |                        |                         |            |            | 3D    |                        |                         |            |            |
|                                                                                                                                                                                                                                                                                                                                                                                                                                                                                 |                        | oiso  | $\delta(\text{calcd})$ | $\delta(\text{scaled})$ | $\Delta 1$ | $\Delta 2$ | oiso  | $\delta(\text{calcd})$ | $\delta(\text{scaled})$ | $\Delta 1$ | $\Delta 2$ | oiso  | $\delta(\text{calcd})$ | $\delta(\text{scaled})$ | $\Delta 1$ | $\Delta 2$ | oiso  | $\delta(\text{calcd})$ | $\delta(\text{scaled})$ | $\Delta 1$ | $\Delta 2$ |
| H-1a                                                                                                                                                                                                                                                                                                                                                                                                                                                                            | 1.90                   | 29.65 | 2.35                   | 1.90                    | 0.45       | 0.00       | 29.36 | 2.64                   | 2.11                    | 0.74       | 0.21       | 29.35 | 2.65                   | 2.10                    | 0.75       | 0.20       | 29.63 | 2.37                   | 1.91                    | 0.47       | 0.01       |
| H-1b                                                                                                                                                                                                                                                                                                                                                                                                                                                                            | 1.94                   | 29.57 | 2.43                   | 1.97                    | 0.49       | 0.03       | 29.85 | 2.15                   | 1.65                    | 0.21       | 0.29       | 29.90 | 2.10                   | 1.58                    | 0.16       | 0.36       | 29.55 | 2.45                   | 1.98                    | 0.51       | 0.04       |
| H-2                                                                                                                                                                                                                                                                                                                                                                                                                                                                             | 2.09                   | 29.52 | 2.48                   | 2.02                    | 0.39       | 0.07       | 29.42 | 2.58                   | 2.06                    | 0.49       | 0.03       | 29.40 | 2.60                   | 2.05                    | 0.51       | 0.04       | 29.52 | 2.48                   | 2.01                    | 0.39       | 0.08       |
| H-3                                                                                                                                                                                                                                                                                                                                                                                                                                                                             | 5.50                   | 25.87 | 6.13                   | 5.46                    | 0.63       | 0.04       | 25.84 | 6.16                   | 5.41                    | 0.66       | 0.09       | 25.90 | 6.10                   | 5.35                    | 0.60       | 0.15       | 25.83 | 6.17                   | 5.51                    | 0.67       | 0.01       |
| H-4                                                                                                                                                                                                                                                                                                                                                                                                                                                                             | 2.29                   | 29.58 | 2.42                   | 1.97                    | 0.13       | 0.32       | 29.41 | 2.59                   | 2.07                    | 0.30       | 0.22       | 29.35 | 2.65                   | 2.09                    | 0.36       | 0.20       | 29.53 | 2.47                   | 2.01                    | 0.18       | 0.28       |

|                                                                                                                                                                                                                                                                                                                                                                                                                                                                                          |      |       |      |      |      |      |       |      |      |      |      |       |      |      |      |      |       |      |      |      |      |
|------------------------------------------------------------------------------------------------------------------------------------------------------------------------------------------------------------------------------------------------------------------------------------------------------------------------------------------------------------------------------------------------------------------------------------------------------------------------------------------|------|-------|------|------|------|------|-------|------|------|------|------|-------|------|------|------|------|-------|------|------|------|------|
| H-5                                                                                                                                                                                                                                                                                                                                                                                                                                                                                      | 2.90 | 28.26 | 3.74 | 3.21 | 0.84 | 0.31 | 27.86 | 4.14 | 3.52 | 1.24 | 0.62 | 28.62 | 3.38 | 2.79 | 0.48 | 0.11 | 28.37 | 3.63 | 3.10 | 0.73 | 0.20 |
| H-7                                                                                                                                                                                                                                                                                                                                                                                                                                                                                      | 5.04 | 25.97 | 6.03 | 5.37 | 0.99 | 0.33 | 26.11 | 5.89 | 5.15 | 0.85 | 0.11 | 26.00 | 6.00 | 5.26 | 0.96 | 0.22 | 26.18 | 5.82 | 5.17 | 0.78 | 0.13 |
| H-8a                                                                                                                                                                                                                                                                                                                                                                                                                                                                                     | 1.92 | 30.13 | 1.87 | 1.45 | 0.05 | 0.47 | 29.34 | 2.66 | 2.13 | 0.74 | 0.21 | 29.32 | 2.68 | 2.13 | 0.76 | 0.21 | 29.60 | 2.40 | 1.94 | 0.48 | 0.02 |
| H-8b                                                                                                                                                                                                                                                                                                                                                                                                                                                                                     | 1.55 | 29.35 | 2.65 | 2.18 | 1.10 | 0.63 | 29.22 | 2.78 | 2.24 | 1.23 | 0.69 | 29.26 | 2.74 | 2.18 | 1.19 | 0.63 | 29.61 | 2.39 | 1.93 | 0.84 | 0.38 |
| H-9                                                                                                                                                                                                                                                                                                                                                                                                                                                                                      | 4.18 | 27.41 | 4.59 | 4.01 | 0.41 | 0.17 | 27.25 | 4.75 | 4.09 | 0.57 | 0.09 | 26.99 | 5.01 | 4.32 | 0.83 | 0.14 | 27.46 | 4.54 | 3.96 | 0.36 | 0.22 |
| H-11                                                                                                                                                                                                                                                                                                                                                                                                                                                                                     | 1.23 | 30.47 | 1.53 | 1.13 | 0.30 | 0.10 | 29.07 | 2.93 | 2.38 | 1.70 | 1.15 | 29.05 | 2.95 | 2.38 | 1.72 | 1.15 | 30.20 | 1.80 | 1.37 | 0.57 | 0.14 |
| H-12                                                                                                                                                                                                                                                                                                                                                                                                                                                                                     | 3.80 | 27.64 | 4.36 | 3.79 | 0.56 | 0.01 | 27.65 | 4.35 | 3.71 | 0.55 | 0.09 | 27.38 | 4.62 | 3.95 | 0.82 | 0.15 | 27.64 | 4.36 | 3.79 | 0.56 | 0.01 |
| H-13                                                                                                                                                                                                                                                                                                                                                                                                                                                                                     | 2.21 | 29.36 | 2.64 | 2.17 | 0.43 | 0.04 | 28.99 | 3.01 | 2.46 | 0.80 | 0.25 | 28.34 | 3.66 | 3.05 | 1.45 | 0.84 | 29.33 | 2.67 | 2.19 | 0.46 | 0.02 |
| H-14                                                                                                                                                                                                                                                                                                                                                                                                                                                                                     | 5.06 | 26.49 | 5.51 | 4.87 | 0.45 | 0.19 | 25.99 | 6.01 | 5.27 | 0.95 | 0.21 | 26.31 | 5.69 | 4.97 | 0.63 | 0.09 | 26.48 | 5.52 | 4.89 | 0.46 | 0.17 |
| H-16                                                                                                                                                                                                                                                                                                                                                                                                                                                                                     | 0.94 | 30.76 | 1.24 | 0.86 | 0.30 | 0.08 | 30.76 | 1.24 | 0.80 | 0.30 | 0.14 | 30.76 | 1.24 | 0.77 | 0.30 | 0.17 | 30.63 | 1.37 | 0.96 | 0.43 | 0.02 |
| H-16                                                                                                                                                                                                                                                                                                                                                                                                                                                                                     | 0.94 | 30.68 | 1.32 | 0.93 | 0.38 | 0.01 | 30.73 | 1.27 | 0.83 | 0.33 | 0.11 | 30.65 | 1.35 | 0.87 | 0.41 | 0.07 | 30.76 | 1.24 | 0.84 | 0.30 | 0.10 |
| H-16                                                                                                                                                                                                                                                                                                                                                                                                                                                                                     | 0.94 | 30.63 | 1.37 | 0.98 | 0.43 | 0.04 | 30.66 | 1.34 | 0.89 | 0.40 | 0.05 | 30.69 | 1.31 | 0.83 | 0.37 | 0.11 | 30.68 | 1.32 | 0.91 | 0.38 | 0.03 |
| H-17                                                                                                                                                                                                                                                                                                                                                                                                                                                                                     | 1.70 | 29.76 | 2.24 | 1.79 | 0.54 | 0.09 | 29.99 | 2.01 | 1.52 | 0.31 | 0.18 | 29.48 | 2.52 | 1.97 | 0.82 | 0.27 | 30.10 | 1.90 | 1.46 | 0.20 | 0.24 |
| H-17                                                                                                                                                                                                                                                                                                                                                                                                                                                                                     | 1.70 | 29.77 | 2.23 | 1.78 | 0.53 | 0.08 | 29.53 | 2.47 | 1.95 | 0.77 | 0.25 | 30.04 | 1.96 | 1.44 | 0.26 | 0.26 | 29.70 | 2.30 | 1.84 | 0.60 | 0.14 |
| H-17                                                                                                                                                                                                                                                                                                                                                                                                                                                                                     | 1.70 | 30.11 | 1.89 | 1.47 | 0.19 | 0.23 | 29.72 | 2.28 | 1.78 | 0.58 | 0.08 | 29.91 | 2.09 | 1.57 | 0.39 | 0.13 | 29.71 | 2.29 | 1.83 | 0.59 | 0.13 |
| H-18                                                                                                                                                                                                                                                                                                                                                                                                                                                                                     | 0.84 | 30.51 | 1.49 | 1.09 | 0.65 | 0.25 | 31.32 | 0.68 | 0.27 | 0.16 | 0.57 | 29.95 | 2.05 | 1.52 | 1.21 | 0.68 | 30.47 | 1.53 | 1.11 | 0.69 | 0.27 |
| H-18                                                                                                                                                                                                                                                                                                                                                                                                                                                                                     | 0.84 | 30.42 | 1.58 | 1.17 | 0.74 | 0.33 | 30.54 | 1.46 | 1.01 | 0.62 | 0.17 | 31.03 | 0.97 | 0.51 | 0.13 | 0.33 | 31.09 | 0.91 | 0.53 | 0.07 | 0.31 |
| H-18                                                                                                                                                                                                                                                                                                                                                                                                                                                                                     | 0.84 | 31.20 | 0.80 | 0.44 | 0.04 | 0.40 | 30.89 | 1.11 | 0.67 | 0.27 | 0.17 | 31.09 | 0.91 | 0.46 | 0.07 | 0.38 | 30.58 | 1.42 | 1.01 | 0.58 | 0.17 |
| H-19                                                                                                                                                                                                                                                                                                                                                                                                                                                                                     | 1.01 | 30.58 | 1.42 | 1.02 | 0.41 | 0.01 | 30.15 | 1.85 | 1.37 | 0.84 | 0.36 | 31.24 | 0.76 | 0.31 | 0.25 | 0.70 | 30.10 | 1.90 | 1.46 | 0.89 | 0.45 |
| H-19                                                                                                                                                                                                                                                                                                                                                                                                                                                                                     | 1.01 | 30.57 | 1.43 | 1.03 | 0.42 | 0.02 | 30.91 | 1.09 | 0.66 | 0.08 | 0.35 | 31.07 | 0.93 | 0.47 | 0.08 | 0.54 | 30.29 | 1.71 | 1.29 | 0.70 | 0.28 |
| H-19                                                                                                                                                                                                                                                                                                                                                                                                                                                                                     | 1.01 | 29.99 | 2.01 | 1.58 | 1.00 | 0.57 | 31.01 | 0.99 | 0.57 | 0.02 | 0.44 | 30.29 | 1.71 | 1.21 | 0.70 | 0.20 | 31.11 | 0.89 | 0.50 | 0.12 | 0.51 |
| H-20                                                                                                                                                                                                                                                                                                                                                                                                                                                                                     | 0.99 | 30.53 | 1.47 | 1.07 | 0.48 | 0.08 | 30.43 | 1.57 | 1.11 | 0.58 | 0.12 | 30.40 | 1.60 | 1.10 | 0.61 | 0.11 | 30.49 | 1.51 | 1.09 | 0.52 | 0.10 |
| H-20                                                                                                                                                                                                                                                                                                                                                                                                                                                                                     | 0.99 | 30.49 | 1.51 | 1.11 | 0.52 | 0.12 | 30.62 | 1.38 | 0.93 | 0.39 | 0.06 | 30.42 | 1.58 | 1.08 | 0.59 | 0.09 | 30.74 | 1.26 | 0.86 | 0.27 | 0.13 |
| H-20                                                                                                                                                                                                                                                                                                                                                                                                                                                                                     | 0.99 | 30.75 | 1.25 | 0.86 | 0.26 | 0.13 | 30.58 | 1.42 | 0.97 | 0.43 | 0.02 | 30.84 | 1.16 | 0.69 | 0.17 | 0.30 | 30.52 | 1.48 | 1.06 | 0.49 | 0.07 |
| H-3',7'                                                                                                                                                                                                                                                                                                                                                                                                                                                                                  | 7.99 | 23.18 | 8.82 | 7.99 | 0.83 | 0.00 | 22.89 | 9.11 | 8.18 | 1.12 | 0.19 | 22.96 | 9.04 | 8.13 | 1.05 | 0.14 | 23.17 | 8.83 | 8.02 | 0.84 | 0.03 |
| H-3',7'                                                                                                                                                                                                                                                                                                                                                                                                                                                                                  | 7.99 | 23.01 | 8.99 | 8.16 | 1.00 | 0.17 | 23.20 | 8.80 | 7.89 | 0.81 | 0.10 | 23.16 | 8.84 | 7.93 | 0.85 | 0.06 | 23.06 | 8.94 | 8.13 | 0.95 | 0.14 |
| H-4',6'                                                                                                                                                                                                                                                                                                                                                                                                                                                                                  | 7.37 | 23.85 | 8.15 | 7.36 | 0.78 | 0.01 | 23.84 | 8.16 | 7.28 | 0.79 | 0.09 | 23.84 | 8.16 | 7.29 | 0.79 | 0.08 | 23.85 | 8.15 | 7.38 | 0.78 | 0.01 |
| H-4',6'                                                                                                                                                                                                                                                                                                                                                                                                                                                                                  | 7.37 | 23.84 | 8.16 | 7.37 | 0.79 | 0.00 | 23.84 | 8.16 | 7.28 | 0.79 | 0.09 | 23.83 | 8.17 | 7.31 | 0.80 | 0.06 | 23.87 | 8.13 | 7.36 | 0.76 | 0.01 |
| H-5'                                                                                                                                                                                                                                                                                                                                                                                                                                                                                     | 7.49 | 23.73 | 8.27 | 7.47 | 0.78 | 0.02 | 23.72 | 8.28 | 7.39 | 0.79 | 0.10 | 23.73 | 8.27 | 7.40 | 0.78 | 0.09 | 23.74 | 8.26 | 7.48 | 0.77 | 0.01 |
| H-2''                                                                                                                                                                                                                                                                                                                                                                                                                                                                                    | 1.90 | 29.61 | 2.39 | 1.94 | 0.49 | 0.04 | 29.93 | 2.07 | 1.58 | 0.17 | 0.32 | 29.55 | 2.45 | 1.91 | 0.55 | 0.01 | 30.12 | 1.88 | 1.44 | 0.02 | 0.46 |
| H-2''                                                                                                                                                                                                                                                                                                                                                                                                                                                                                    | 1.90 | 29.73 | 2.27 | 1.83 | 0.37 | 0.07 | 30.05 | 1.95 | 1.46 | 0.05 | 0.44 | 29.80 | 2.20 | 1.67 | 0.30 | 0.23 | 29.59 | 2.41 | 1.94 | 0.51 | 0.04 |
| H-2''                                                                                                                                                                                                                                                                                                                                                                                                                                                                                    | 1.90 | 30.12 | 1.88 | 1.46 | 0.02 | 0.44 | 29.64 | 2.36 | 1.84 | 0.46 | 0.06 | 29.46 | 2.54 | 2.00 | 0.64 | 0.10 | 29.54 | 2.46 | 1.99 | 0.56 | 0.09 |
| H-2'''                                                                                                                                                                                                                                                                                                                                                                                                                                                                                   | 2.11 | 29.89 | 2.11 | 1.67 | 0.00 | 0.44 | 29.53 | 2.47 | 1.95 | 0.36 | 0.16 | 29.37 | 2.63 | 2.08 | 0.52 | 0.03 | 29.34 | 2.66 | 2.18 | 0.55 | 0.07 |
| H-2'''                                                                                                                                                                                                                                                                                                                                                                                                                                                                                   | 2.11 | 29.39 | 2.61 | 2.15 | 0.50 | 0.04 | 29.72 | 2.28 | 1.77 | 0.17 | 0.34 | 29.89 | 2.11 | 1.58 | 0.00 | 0.53 | 29.67 | 2.33 | 1.87 | 0.22 | 0.24 |
| H-2'''                                                                                                                                                                                                                                                                                                                                                                                                                                                                                   | 2.11 | 29.36 | 2.64 | 2.18 | 0.53 | 0.07 | 29.36 | 2.64 | 2.11 | 0.53 | 0.00 | 29.43 | 2.57 | 2.02 | 0.46 | 0.09 | 29.61 | 2.39 | 1.93 | 0.28 | 0.18 |
| $\Delta 1 =  \delta(\text{calcd}) - \delta(\text{exptl}) $ , $\Delta 2 =  \delta(\text{scaled}) - \delta(\text{exptl}) $ ;<br><b>3A:</b> $Y = 1.0619X + 0.3311$ , $R^2 = 0.9887$ , MAE = 0.50 ppm, CMAE = 0.20 ppm; <b>3B:</b> $Y = 1.0669X + 0.3886$ , $R^2 = 0.9796$ , MAE = 0.60 ppm, CMAE = 0.20 ppm;<br><b>3C:</b> $Y = 1.0598X + 0.4289$ , $R^2 = 0.9745$ , MAE = 0.60 ppm, CMAE = 0.30 ppm; <b>3D:</b> $Y = 1.0558X + 0.3555$ , $R^2 = 0.9918$ , MAE = 0.50 ppm, CMAE = 0.10 ppm; |      |       |      |      |      |      |       |      |      |      |      |       |      |      |      |      |       |      |      |      |      |

**Table S30.** Experimental chemical shifts of **3**, calculated shielding tensors and chemical shifts of isomers **3E–3H** in chloroform with TMS as reference at mPW1PW91/6-31G\*\* level.

| Nuclie | $\delta(\text{exptl})$ | <b>3E</b>             |                        |                         |            |            | <b>3F</b>             |                        |                         |            |            | <b>3G</b>             |                        |                         |            |            | <b>3H</b>             |                        |                         |            |            |
|--------|------------------------|-----------------------|------------------------|-------------------------|------------|------------|-----------------------|------------------------|-------------------------|------------|------------|-----------------------|------------------------|-------------------------|------------|------------|-----------------------|------------------------|-------------------------|------------|------------|
|        |                        | $\sigma_{\text{iso}}$ | $\delta(\text{calcd})$ | $\delta(\text{scaled})$ | $\Delta 1$ | $\Delta 2$ | $\sigma_{\text{iso}}$ | $\delta(\text{calcd})$ | $\delta(\text{scaled})$ | $\Delta 1$ | $\Delta 2$ | $\sigma_{\text{iso}}$ | $\delta(\text{calcd})$ | $\delta(\text{scaled})$ | $\Delta 1$ | $\Delta 2$ | $\sigma_{\text{iso}}$ | $\delta(\text{calcd})$ | $\delta(\text{scaled})$ | $\Delta 1$ | $\Delta 2$ |
| C-1    | 36.3                   | 156.8                 | 35.2                   | 35.3                    | 1.1        | 1.0        | 156.4                 | 35.6                   | 36.8                    | 0.7        | 0.5        | 156.4                 | 35.6                   | 36.9                    | 0.7        | 0.6        | 156.4                 | 35.6                   | 36.2                    | 0.7        | 0.1        |
| C-2    | 36.3                   | 155.0                 | 37.0                   | 37.2                    | 0.7        | 0.9        | 155.7                 | 36.3                   | 37.5                    | 0.0        | 1.2        | 155.7                 | 36.3                   | 37.6                    | 0.0        | 1.3        | 155.6                 | 36.4                   | 37.1                    | 0.1        | 0.8        |
| C-3    | 78.6                   | 116.4                 | 75.6                   | 78.2                    | 3.0        | 0.4        | 116.9                 | 75.1                   | 78.3                    | 3.5        | 0.3        | 117.0                 | 75.0                   | 78.3                    | 3.6        | 0.3        | 117.1                 | 74.9                   | 77.7                    | 3.7        | 0.9        |
| C-4    | 46.4                   | 139.4                 | 52.6                   | 53.8                    | 6.2        | 7.4        | 145.8                 | 46.2                   | 48.0                    | 0.2        | 1.6        | 145.8                 | 46.2                   | 47.9                    | 0.2        | 1.5        | 143.8                 | 48.2                   | 49.5                    | 1.8        | 3.1        |
| C-5    | 31.7                   | 154.8                 | 37.2                   | 37.4                    | 5.5        | 5.7        | 152.7                 | 39.3                   | 40.7                    | 7.6        | 9.0        | 152.6                 | 39.4                   | 40.9                    | 7.7        | 9.2        | 154.5                 | 37.5                   | 38.2                    | 5.8        | 6.5        |
| C-6    | 140.5                  | 55.7                  | 136.3                  | 142.9                   | 4.2        | 2.4        | 57.6                  | 134.4                  | 140.6                   | 6.1        | 0.1        | 59.0                  | 133.0                  | 139.1                   | 7.5        | 1.4        | 59.5                  | 132.5                  | 138.7                   | 8.0        | 1.8        |
| C-7    | 121.7                  | 76.6                  | 115.4                  | 120.6                   | 6.3        | 1.1        | 74.7                  | 117.3                  | 122.7                   | 4.4        | 1.0        | 74.0                  | 118.0                  | 123.3                   | 3.7        | 1.6        | 74.4                  | 117.6                  | 123.0                   | 4.1        | 1.3        |
| C-8    | 25.3                   | 164.3                 | 27.7                   | 27.3                    | 2.4        | 2.0        | 164.8                 | 27.2                   | 28.0                    | 1.9        | 2.7        | 164.4                 | 27.6                   | 28.4                    | 2.3        | 3.1        | 165.3                 | 26.7                   | 26.8                    | 1.4        | 1.5        |
| C-9    | 77.9                   | 119.0                 | 73.0                   | 75.5                    | 4.9        | 2.4        | 114.1                 | 77.9                   | 81.2                    | 0.0        | 3.3        | 114.0                 | 78.0                   | 81.4                    | 0.1        | 3.5        | 116.1                 | 75.9                   | 78.8                    | 2.0        | 0.9        |
| C-10   | 41.0                   | 152.6                 | 39.4                   | 39.7                    | 1.6        | 1.3        | 155.1                 | 36.9                   | 38.2                    | 4.1        | 2.8        | 155.1                 | 36.9                   | 38.2                    | 4.1        | 2.8        | 152.1                 | 39.9                   | 40.8                    | 1.1        | 0.2        |
| C-11   | 47.0                   | 146.4                 | 45.6                   | 46.4                    | 1.4        | 0.6        | 151.7                 | 40.3                   | 41.7                    | 6.7        | 5.3        | 150.6                 | 41.4                   | 42.9                    | 5.6        | 4.1        | 148.2                 | 43.8                   | 44.9                    | 3.2        | 2.1        |

|         |       |       |       |       |     |     |       |       |       |     |     |       |       |       |      |      |       |       |       |     |     |
|---------|-------|-------|-------|-------|-----|-----|-------|-------|-------|-----|-----|-------|-------|-------|------|------|-------|-------|-------|-----|-----|
| C-12    | 80.4  | 115.3 | 76.7  | 79.5  | 3.7 | 0.9 | 111.8 | 80.2  | 83.7  | 0.2 | 3.3 | 111.9 | 80.1  | 83.6  | 0.3  | 3.2  | 113.5 | 78.5  | 81.6  | 1.9 | 1.2 |
| C-13    | 44.5  | 148.5 | 43.5  | 44.1  | 1.0 | 0.4 | 154.5 | 37.5  | 38.8  | 7.0 | 5.7 | 154.5 | 37.5  | 38.8  | 7.0  | 5.7  | 150.0 | 42.0  | 43.0  | 2.5 | 1.5 |
| C-14    | 79.2  | 111.4 | 80.6  | 83.6  | 1.4 | 4.4 | 114.8 | 77.2  | 80.6  | 2.0 | 1.4 | 114.6 | 77.4  | 80.7  | 1.8  | 1.5  | 113.4 | 78.6  | 81.7  | 0.6 | 2.5 |
| C-15    | 89.7  | 107.0 | 85.0  | 88.2  | 4.7 | 1.5 | 101.2 | 90.8  | 94.9  | 1.1 | 5.2 | 101.3 | 90.7  | 94.6  | 1.0  | 4.9  | 104.2 | 87.8  | 91.4  | 1.9 | 1.7 |
| C-16    | 13.4  | 180.5 | 11.5  | 10.1  | 1.9 | 3.3 | 179.8 | 12.2  | 12.2  | 1.2 | 1.2 | 179.9 | 12.1  | 12.2  | 1.3  | 1.2  | 180.6 | 11.4  | 10.6  | 2.0 | 2.8 |
| C-17    | 20.4  | 167.6 | 24.4  | 23.8  | 4.0 | 3.4 | 170.6 | 21.4  | 21.9  | 1.0 | 1.5 | 170.6 | 21.4  | 21.9  | 1.0  | 1.5  | 167.5 | 24.5  | 24.5  | 4.1 | 4.1 |
| C-18    | 27.2  | 166.0 | 26.0  | 25.5  | 1.2 | 1.7 | 170.0 | 22.0  | 22.5  | 5.2 | 4.7 | 175.4 | 16.6  | 16.9  | 10.6 | 10.3 | 168.0 | 24.0  | 23.9  | 3.2 | 3.3 |
| C-19    | 20.6  | 167.4 | 24.6  | 23.9  | 4.0 | 3.3 | 170.3 | 21.7  | 22.2  | 1.1 | 1.6 | 166.4 | 25.6  | 26.3  | 5.0  | 5.7  | 169.7 | 22.3  | 22.2  | 1.7 | 1.6 |
| C-20    | 13.3  | 180.3 | 11.7  | 10.3  | 1.6 | 3.0 | 179.2 | 12.8  | 12.8  | 0.5 | 0.5 | 179.4 | 12.6  | 12.7  | 0.7  | 0.6  | 179.8 | 12.2  | 11.5  | 1.1 | 1.8 |
| C-1'    | 165.4 | 33.2  | 158.8 | 166.8 | 6.6 | 1.4 | 33.5  | 158.5 | 165.9 | 6.9 | 0.5 | 33.4  | 158.6 | 166.0 | 6.8  | 0.6  | 32.6  | 159.4 | 167.1 | 6.0 | 1.7 |
| C-2'    | 129.8 | 69.2  | 122.8 | 128.5 | 7.0 | 1.3 | 68.2  | 123.8 | 129.5 | 6.0 | 0.3 | 68.4  | 123.6 | 129.3 | 6.2  | 0.5  | 68.7  | 123.3 | 128.9 | 6.5 | 0.9 |
| C-3',7' | 129.5 | 68.2  | 123.8 | 129.6 | 5.7 | 0.1 | 67.6  | 124.4 | 130.1 | 5.1 | 0.6 | 69.1  | 122.9 | 128.5 | 6.6  | 1.0  | 68.7  | 123.3 | 129.0 | 6.2 | 0.5 |
| C-3',7' | 129.5 | 67.5  | 124.5 | 130.3 | 5.0 | 0.8 | 68.6  | 123.4 | 129.0 | 6.1 | 0.5 | 67.7  | 124.3 | 129.9 | 5.2  | 0.4  | 67.2  | 124.8 | 130.6 | 4.7 | 1.1 |
| C-4',6' | 128.5 | 71.1  | 120.9 | 126.5 | 7.6 | 2.0 | 70.8  | 121.2 | 126.8 | 7.3 | 1.7 | 70.6  | 121.4 | 127.0 | 7.1  | 1.5  | 71.0  | 121.0 | 126.5 | 7.5 | 2.0 |
| C-4',6' | 128.5 | 71.1  | 120.9 | 126.5 | 7.6 | 2.0 | 70.8  | 121.2 | 126.8 | 7.3 | 1.7 | 70.7  | 121.3 | 126.8 | 7.2  | 1.7  | 70.8  | 121.2 | 126.7 | 7.3 | 1.8 |
| C-5'    | 133.2 | 65.9  | 126.1 | 132.0 | 7.1 | 1.2 | 65.9  | 126.1 | 131.8 | 7.1 | 1.4 | 65.7  | 126.3 | 132.1 | 6.9  | 1.1  | 65.8  | 126.2 | 132.0 | 7.0 | 1.2 |
| C-1''   | 170.4 | 30.2  | 161.8 | 170.0 | 8.6 | 0.4 | 30.4  | 161.6 | 169.2 | 8.8 | 1.2 | 29.5  | 162.5 | 170.1 | 7.9  | 0.3  | 29.6  | 162.4 | 170.3 | 8.0 | 0.1 |
| C-2''   | 21.0  | 173.7 | 18.3  | 17.2  | 2.7 | 3.8 | 174.1 | 17.9  | 18.2  | 3.1 | 2.8 | 174.1 | 17.9  | 18.3  | 3.1  | 2.7  | 174.0 | 18.0  | 17.6  | 3.0 | 3.4 |
| C-1'''  | 171.3 | 28.4  | 163.6 | 172.0 | 7.7 | 0.7 | 28.9  | 163.1 | 170.8 | 8.2 | 0.5 | 28.9  | 163.1 | 170.8 | 8.2  | 0.5  | 28.6  | 163.4 | 171.4 | 7.9 | 0.1 |
| C-2'''  | 20.9  | 174.2 | 17.8  | 16.8  | 3.1 | 4.1 | 174.4 | 17.6  | 18.0  | 3.3 | 2.9 | 174.4 | 17.6  | 18.0  | 3.3  | 2.9  | 174.3 | 17.7  | 17.3  | 3.2 | 3.6 |

$\Delta 1 = |\bar{\delta}(\text{calcd}) - \bar{\delta}(\text{exptl})|$ ,  $\Delta 2 = |\bar{\delta}(\text{scaled}) - \bar{\delta}(\text{exptl})|$ ;  
**3E**:  $Y = 0.9395X + 2.0665$ ,  $R^2 = 0.9974$ , MAE = 4.2 ppm, CMAE = 2.1 ppm; **3F**:  $Y = 0.9521X + 0.5352$ ,  $R^2 = 0.9968$ , MAE = 4.0 ppm, CMAE = 2.2 ppm;  
**3G**:  $Y = 0.9523X + 0.5187$ ,  $R^2 = 0.9955$ , MAE = 4.3 ppm, CMAE = 2.5 ppm; **3H**:  $Y = 0.9456X + 1.3659$ ,  $R^2 = 0.9981$ , MAE = 3.8 ppm, CMAE = 1.8 ppm.

| Nuclie | $\bar{\delta}(\text{exptl})$ | 3E                    |                              |                               |            |            | 3F                    |                              |                               |            |            | 3G                    |                              |                               |            |            | 3H                    |                              |                               |            |            |
|--------|------------------------------|-----------------------|------------------------------|-------------------------------|------------|------------|-----------------------|------------------------------|-------------------------------|------------|------------|-----------------------|------------------------------|-------------------------------|------------|------------|-----------------------|------------------------------|-------------------------------|------------|------------|
|        |                              | $\sigma_{\text{iso}}$ | $\bar{\delta}(\text{calcd})$ | $\bar{\delta}(\text{scaled})$ | $\Delta 1$ | $\Delta 2$ | $\sigma_{\text{iso}}$ | $\bar{\delta}(\text{calcd})$ | $\bar{\delta}(\text{scaled})$ | $\Delta 1$ | $\Delta 2$ | $\sigma_{\text{iso}}$ | $\bar{\delta}(\text{calcd})$ | $\bar{\delta}(\text{scaled})$ | $\Delta 1$ | $\Delta 2$ | $\sigma_{\text{iso}}$ | $\bar{\delta}(\text{calcd})$ | $\bar{\delta}(\text{scaled})$ | $\Delta 1$ | $\Delta 2$ |
| H-1a   | 1.90                         | 29.78                 | 2.22                         | 1.73                          | 0.32       | 0.17       | 29.96                 | 2.04                         | 1.60                          | 0.14       | 0.30       | 29.95                 | 2.05                         | 1.59                          | 0.15       | 0.31       | 29.67                 | 2.33                         | 1.85                          | 0.43       | 0.05       |
| H-1b   | 1.94                         | 29.50                 | 2.50                         | 2.00                          | 0.56       | 0.06       | 29.39                 | 2.61                         | 2.13                          | 0.67       | 0.19       | 29.36                 | 2.64                         | 2.15                          | 0.70       | 0.21       | 29.43                 | 2.57                         | 2.08                          | 0.63       | 0.14       |
| H-2    | 2.09                         | 29.59                 | 2.41                         | 1.92                          | 0.32       | 0.17       | 29.38                 | 2.62                         | 2.14                          | 0.53       | 0.05       | 29.40                 | 2.60                         | 2.11                          | 0.51       | 0.02       | 29.60                 | 2.40                         | 1.92                          | 0.31       | 0.17       |
| H-3    | 5.50                         | 25.61                 | 6.39                         | 5.68                          | 0.89       | 0.18       | 25.99                 | 6.01                         | 5.33                          | 0.51       | 0.17       | 26.00                 | 6.00                         | 5.33                          | 0.50       | 0.17       | 25.74                 | 6.26                         | 5.58                          | 0.76       | 0.08       |
| H-4    | 2.29                         | 29.09                 | 2.91                         | 2.39                          | 0.62       | 0.10       | 29.46                 | 2.54                         | 2.07                          | 0.25       | 0.22       | 29.46                 | 2.54                         | 2.06                          | 0.25       | 0.23       | 29.33                 | 2.67                         | 2.18                          | 0.38       | 0.11       |
| H-5    | 2.90                         | 28.78                 | 3.22                         | 2.69                          | 0.32       | 0.21       | 29.10                 | 2.90                         | 2.41                          | 0.00       | 0.49       | 29.03                 | 2.97                         | 2.46                          | 0.07       | 0.44       | 28.61                 | 3.39                         | 2.86                          | 0.49       | 0.04       |
| H-7    | 5.04                         | 26.41                 | 5.59                         | 4.93                          | 0.55       | 0.11       | 26.12                 | 5.88                         | 5.20                          | 0.84       | 0.16       | 26.11                 | 5.89                         | 5.23                          | 0.85       | 0.19       | 26.23                 | 5.77                         | 5.11                          | 0.73       | 0.07       |
| H-8a   | 1.92                         | 28.52                 | 3.48                         | 2.93                          | 1.56       | 1.01       | 29.97                 | 2.03                         | 1.59                          | 0.11       | 0.33       | 30.21                 | 1.79                         | 1.34                          | 0.13       | 0.58       | 29.40                 | 2.60                         | 2.10                          | 0.68       | 0.18       |
| H-8b   | 1.55                         | 29.63                 | 2.37                         | 1.88                          | 0.82       | 0.33       | 29.83                 | 2.17                         | 1.72                          | 0.62       | 0.17       | 29.45                 | 2.55                         | 2.07                          | 1.00       | 0.52       | 29.54                 | 2.46                         | 1.98                          | 0.91       | 0.43       |
| H-9    | 4.18                         | 26.89                 | 5.11                         | 4.48                          | 0.93       | 0.30       | 27.21                 | 4.79                         | 4.18                          | 0.61       | 0.00       | 27.27                 | 4.73                         | 4.13                          | 0.55       | 0.05       | 27.07                 | 4.93                         | 4.32                          | 0.75       | 0.14       |
| H-11   | 1.23                         | 30.06                 | 1.94                         | 1.47                          | 0.71       | 0.24       | 28.49                 | 3.51                         | 2.98                          | 2.28       | 1.75       | 28.79                 | 3.21                         | 2.69                          | 1.98       | 1.46       | 29.95                 | 2.05                         | 1.58                          | 0.82       | 0.35       |
| H-12   | 3.80                         | 26.96                 | 5.04                         | 4.41                          | 1.24       | 0.61       | 27.35                 | 4.65                         | 4.05                          | 0.85       | 0.25       | 27.42                 | 4.58                         | 3.98                          | 0.78       | 0.18       | 27.43                 | 4.57                         | 3.98                          | 0.77       | 0.18       |
| H-13   | 2.21                         | 29.38                 | 2.62                         | 2.11                          | 0.41       | 0.10       | 29.02                 | 2.98                         | 2.48                          | 0.77       | 0.27       | 28.98                 | 3.02                         | 2.51                          | 0.81       | 0.30       | 29.23                 | 2.77                         | 2.27                          | 0.56       | 0.06       |
| H-14   | 5.06                         | 26.43                 | 5.57                         | 4.91                          | 0.51       | 0.15       | 26.28                 | 5.72                         | 5.05                          | 0.66       | 0.01       | 26.32                 | 5.68                         | 5.03                          | 0.62       | 0.03       | 26.36                 | 5.64                         | 5.00                          | 0.58       | 0.06       |
| H-16   | 0.94                         | 31.05                 | 0.95                         | 0.53                          | 0.01       | 0.41       | 30.63                 | 1.37                         | 0.96                          | 0.43       | 0.02       | 30.79                 | 1.21                         | 0.79                          | 0.27       | 0.15       | 30.70                 | 1.30                         | 0.88                          | 0.36       | 0.06       |
| H-16   | 0.94                         | 30.76                 | 1.24                         | 0.81                          | 0.30       | 0.13       | 30.76                 | 1.24                         | 0.84                          | 0.30       | 0.10       | 30.67                 | 1.33                         | 0.91                          | 0.39       | 0.03       | 30.83                 | 1.17                         | 0.75                          | 0.23       | 0.19       |
| H-16   | 0.94                         | 30.56                 | 1.44                         | 1.00                          | 0.50       | 0.06       | 30.66                 | 1.34                         | 0.94                          | 0.40       | 0.00       | 30.64                 | 1.36                         | 0.94                          | 0.42       | 0.00       | 30.76                 | 1.24                         | 0.81                          | 0.30       | 0.13       |
| H-17   | 1.70                         | 29.63                 | 2.37                         | 1.88                          | 0.67       | 0.18       | 30.07                 | 1.93                         | 1.49                          | 0.23       | 0.21       | 29.63                 | 2.37                         | 1.89                          | 0.67       | 0.19       | 29.52                 | 2.48                         | 1.99                          | 0.78       | 0.29       |
| H-17   | 1.70                         | 30.10                 | 1.90                         | 1.43                          | 0.20       | 0.27       | 29.64                 | 2.36                         | 1.90                          | 0.66       | 0.20       | 30.07                 | 1.93                         | 1.48                          | 0.23       | 0.22       | 29.98                 | 2.02                         | 1.55                          | 0.32       | 0.15       |
| H-17   | 1.70                         | 30.45                 | 1.55                         | 1.10                          | 0.15       | 0.60       | 30.09                 | 1.91                         | 1.47                          | 0.21       | 0.23       | 30.06                 | 1.94                         | 1.48                          | 0.24       | 0.22       | 30.16                 | 1.84                         | 1.39                          | 0.14       | 0.31       |
| H-18   | 0.84                         | 30.04                 | 1.96                         | 1.48                          | 1.12       | 0.64       | 30.31                 | 1.69                         | 1.27                          | 0.85       | 0.43       | 30.20                 | 1.80                         | 1.36                          | 0.96       | 0.52       | 30.91                 | 1.09                         | 0.67                          | 0.25       | 0.17       |
| H-18   | 0.84                         | 30.82                 | 1.18                         | 0.75                          | 0.34       | 0.09       | 30.96                 | 1.04                         | 0.66                          | 0.20       | 0.18       | 30.87                 | 1.13                         | 0.72                          | 0.29       | 0.12       | 30.35                 | 1.65                         | 1.20                          | 0.81       | 0.36       |
| H-18   | 0.84                         | 30.89                 | 1.11                         | 0.68                          | 0.27       | 0.16       | 30.92                 | 1.08                         | 0.70                          | 0.24       | 0.14       | 30.66                 | 1.34                         | 0.91                          | 0.50       | 0.07       | 30.66                 | 1.34                         | 0.91                          | 0.50       | 0.07       |
| H-19   | 1.01                         | 31.13                 | 0.87                         | 0.45                          | 0.14       | 0.56       | 30.71                 | 1.29                         | 0.89                          | 0.28       | 0.12       | 30.87                 | 1.13                         | 0.72                          | 0.12       | 0.29       | 30.68                 | 1.32                         | 0.89                          | 0.31       | 0.12       |
| H-19   | 1.01                         | 30.84                 | 1.16                         | 0.73                          | 0.15       | 0.28       | 31.04                 | 0.96                         | 0.59                          | 0.05       | 0.42       | 30.73                 | 1.27                         | 0.85                          | 0.26       | 0.16       | 31.18                 | 0.82                         | 0.41                          | 0.19       | 0.60       |
| H-19   | 1.01                         | 30.18                 | 1.82                         | 1.36                          | 0.81       | 0.35       | 30.23                 | 1.77                         | 1.35                          | 0.76       | 0.34       | 30.69                 | 1.31                         | 0.89                          | 0.30       | 0.12       | 29.83                 | 2.17                         | 1.70                          | 1.16       | 0.69       |
| H-20   | 0.99                         | 30.60                 | 1.40                         | 0.96                          | 0.41       | 0.03       | 30.35                 | 1.65                         | 1.23                          | 0.66       | 0.24       | 30.38                 | 1.62                         | 1.18                          | 0.63       | 0.19       | 30.56                 | 1.44                         | 1.00                          | 0.45       | 0.01       |
| H-20   | 0.99                         | 30.52                 | 1.48                         | 1.03                          | 0.49       | 0.04       | 30.71                 | 1.29                         | 0.89                          | 0.30       | 0.10       | 30.75                 | 1.25                         | 0.84                          | 0.26       | 0.15       | 30.45                 | 1.55                         | 1.11                          | 0.56       | 0.12       |

|                                                                                                                                                                                                                                                                                                                                                                                                                                                                                             |      |       |      |      |      |      |       |      |      |      |      |       |      |      |      |      |       |      |      |      |      |
|---------------------------------------------------------------------------------------------------------------------------------------------------------------------------------------------------------------------------------------------------------------------------------------------------------------------------------------------------------------------------------------------------------------------------------------------------------------------------------------------|------|-------|------|------|------|------|-------|------|------|------|------|-------|------|------|------|------|-------|------|------|------|------|
| H-20                                                                                                                                                                                                                                                                                                                                                                                                                                                                                        | 0.99 | 30.49 | 1.51 | 1.06 | 0.52 | 0.07 | 30.53 | 1.47 | 1.06 | 0.48 | 0.07 | 30.55 | 1.45 | 1.02 | 0.46 | 0.03 | 30.69 | 1.31 | 0.88 | 0.32 | 0.11 |
| H-3',7'                                                                                                                                                                                                                                                                                                                                                                                                                                                                                     | 7.99 | 23.27 | 8.73 | 7.91 | 0.74 | 0.08 | 23.19 | 8.81 | 7.96 | 0.82 | 0.03 | 22.92 | 9.08 | 8.25 | 1.09 | 0.26 | 23.22 | 8.78 | 7.98 | 0.79 | 0.01 |
| H-3',6'                                                                                                                                                                                                                                                                                                                                                                                                                                                                                     | 7.99 | 23.19 | 8.81 | 7.98 | 0.82 | 0.01 | 22.84 | 9.16 | 8.29 | 1.17 | 0.30 | 23.21 | 8.79 | 7.97 | 0.80 | 0.02 | 23.20 | 8.80 | 7.99 | 0.81 | 0.00 |
| H-4',6'                                                                                                                                                                                                                                                                                                                                                                                                                                                                                     | 7.37 | 23.96 | 8.04 | 7.25 | 0.67 | 0.12 | 23.84 | 8.16 | 7.34 | 0.79 | 0.03 | 23.83 | 8.17 | 7.38 | 0.80 | 0.01 | 23.92 | 8.08 | 7.31 | 0.71 | 0.06 |
| H-4',6'                                                                                                                                                                                                                                                                                                                                                                                                                                                                                     | 7.37 | 23.86 | 8.14 | 7.35 | 0.77 | 0.02 | 23.79 | 8.21 | 7.40 | 0.84 | 0.03 | 23.84 | 8.16 | 7.37 | 0.79 | 0.00 | 23.86 | 8.14 | 7.37 | 0.77 | 0.00 |
| H-5'                                                                                                                                                                                                                                                                                                                                                                                                                                                                                        | 7.49 | 23.77 | 8.23 | 7.43 | 0.74 | 0.06 | 23.73 | 8.27 | 7.45 | 0.78 | 0.04 | 23.72 | 8.28 | 7.48 | 0.79 | 0.01 | 23.76 | 8.24 | 7.46 | 0.75 | 0.03 |
| H-2''                                                                                                                                                                                                                                                                                                                                                                                                                                                                                       | 1.90 | 29.46 | 2.54 | 2.04 | 0.64 | 0.14 | 29.85 | 2.15 | 1.71 | 0.25 | 0.19 | 29.54 | 2.46 | 1.98 | 0.56 | 0.08 | 29.77 | 2.23 | 1.76 | 0.33 | 0.14 |
| H-2''                                                                                                                                                                                                                                                                                                                                                                                                                                                                                       | 1.90 | 29.99 | 2.01 | 1.53 | 0.11 | 0.37 | 30.07 | 1.93 | 1.49 | 0.03 | 0.41 | 30.13 | 1.87 | 1.42 | 0.03 | 0.48 | 29.58 | 2.42 | 1.94 | 0.52 | 0.04 |
| H-2''                                                                                                                                                                                                                                                                                                                                                                                                                                                                                       | 1.90 | 29.41 | 2.59 | 2.09 | 0.69 | 0.19 | 30.06 | 1.94 | 1.51 | 0.04 | 0.39 | 29.60 | 2.40 | 1.92 | 0.50 | 0.02 | 29.96 | 2.04 | 1.57 | 0.14 | 0.33 |
| H-2'''                                                                                                                                                                                                                                                                                                                                                                                                                                                                                      | 2.11 | 29.31 | 2.69 | 2.18 | 0.58 | 0.07 | 29.38 | 2.62 | 2.15 | 0.51 | 0.04 | 29.38 | 2.62 | 2.13 | 0.51 | 0.02 | 29.48 | 2.52 | 2.03 | 0.41 | 0.08 |
| H-2'''                                                                                                                                                                                                                                                                                                                                                                                                                                                                                      | 2.11 | 29.34 | 2.66 | 2.15 | 0.55 | 0.04 | 29.35 | 2.65 | 2.17 | 0.54 | 0.06 | 29.35 | 2.65 | 2.15 | 0.54 | 0.04 | 29.36 | 2.64 | 2.15 | 0.53 | 0.04 |
| H-2'''                                                                                                                                                                                                                                                                                                                                                                                                                                                                                      | 2.11 | 29.89 | 2.11 | 1.63 | 0.00 | 0.48 | 29.91 | 2.09 | 1.64 | 0.02 | 0.47 | 29.91 | 2.09 | 1.62 | 0.02 | 0.49 | 29.74 | 2.26 | 1.78 | 0.15 | 0.33 |
| $\Delta 1 =  \delta(\text{calcd}) - \delta(\text{exptl}) $ , $\Delta 2 =  \delta(\text{scaled}) - \delta(\text{exptl}) $ ;<br><b>3E</b> : $Y = 1.0549X + 0.3859$ , $R^2 = 0.9803$ , MAE = 0.60 ppm, CMAE = 0.20 ppm; <b>3F</b> : $Y = 1.0641X + 0.3399$ , $R^2 = 0.9737$ , MAE = 0.50 ppm, CMAE = 0.20 ppm;<br><b>3G</b> : $Y = 1.0569X + 0.3699$ , $R^2 = 0.9774$ , MAE = 0.50 ppm, CMAE = 0.20 ppm; <b>3H</b> : $Y = 1.0531X + 0.382$ , $R^2 = 0.9897$ , MAE = 0.50 ppm, CMAE = 0.20 ppm; |      |       |      |      |      |      |       |      |      |      |      |       |      |      |      |      |       |      |      |      |      |

| Functional       | Solvent?  |          | Basis Set |          | Type of Data      |          |          |          |
|------------------|-----------|----------|-----------|----------|-------------------|----------|----------|----------|
| mPW1PW91         | Gas Phase |          | 6-31G(d)  |          | Shielding Tensors |          |          |          |
|                  | Isomer 1  | Isomer 2 | Isomer 3  | Isomer 4 | Isomer 5          | Isomer 6 | Isomer 7 | Isomer 8 |
| sDP4+ (H data)   | 2.81%     | 0.00%    | 0.00%     | 97.09%   | 0.00%             | 0.00%    | 0.00%    | 0.09%    |
| sDP4+ (C data)   | 0.00%     | 0.00%    | 0.00%     | 100.00%  | 0.00%             | 0.00%    | 0.00%    | 0.00%    |
| sDP4+ (all data) | 0.00%     | 0.00%    | 0.00%     | 100.00%  | 0.00%             | 0.00%    | 0.00%    | 0.00%    |
| uDP4+ (H data)   | 37.43%    | 0.00%    | 0.00%     | 60.04%   | 0.00%             | 0.00%    | 0.00%    | 2.53%    |
| uDP4+ (C data)   | 0.00%     | 0.00%    | 0.00%     | 100.00%  | 0.00%             | 0.00%    | 0.00%    | 0.00%    |
| uDP4+ (all data) | 0.00%     | 0.00%    | 0.00%     | 100.00%  | 0.00%             | 0.00%    | 0.00%    | 0.00%    |
| DP4+ (H data)    | 1.77%     | 0.00%    | 0.00%     | 98.22%   | 0.00%             | 0.00%    | 0.00%    | 0.00%    |
| DP4+ (C data)    | 0.00%     | 0.00%    | 0.00%     | 100.00%  | 0.00%             | 0.00%    | 0.00%    | 0.00%    |
| DP4+ (all data)  | 0.00%     | 0.00%    | 0.00%     | 100.00%  | 0.00%             | 0.00%    | 0.00%    | 0.00%    |

Figure S22. Detailed DP4+ probability of **3** calculated at mPW1PW91/6-31G\* level in gas phase.

| Functional       | Solvent? |          | Basis Set  |          | Type of Data      |          |          |          |
|------------------|----------|----------|------------|----------|-------------------|----------|----------|----------|
| mPW1PW91         | PCM      |          | 6-31G(d,p) |          | Shielding Tensors |          |          |          |
|                  | Isomer 1 | Isomer 2 | Isomer 3   | Isomer 4 | Isomer 5          | Isomer 6 | Isomer 7 | Isomer 8 |
| sDP4+ (H data)   | 2.06%    | 0.00%    | 0.00%      | 96.60%   | 0.00%             | 0.00%    | 0.00%    | 1.33%    |
| sDP4+ (C data)   | 0.00%    | 0.00%    | 0.00%      | 100.00%  | 0.00%             | 0.00%    | 0.00%    | 0.00%    |
| sDP4+ (all data) | 0.00%    | 0.00%    | 0.00%      | 100.00%  | 0.00%             | 0.00%    | 0.00%    | 0.00%    |
| uDP4+ (H data)   | 11.69%   | 0.00%    | 0.00%      | 61.48%   | 0.00%             | 0.00%    | 0.00%    | 26.84%   |
| uDP4+ (C data)   | 0.00%    | 0.00%    | 0.00%      | 100.00%  | 0.00%             | 0.00%    | 0.00%    | 0.00%    |
| uDP4+ (all data) | 0.00%    | 0.00%    | 0.00%      | 100.00%  | 0.00%             | 0.00%    | 0.00%    | 0.00%    |
| DP4+ (H data)    | 0.40%    | 0.00%    | 0.00%      | 99.00%   | 0.00%             | 0.00%    | 0.00%    | 0.60%    |
| DP4+ (C data)    | 0.00%    | 0.00%    | 0.00%      | 100.00%  | 0.00%             | 0.00%    | 0.00%    | 0.00%    |
| DP4+ (all data)  | 0.00%    | 0.00%    | 0.00%      | 100.00%  | 0.00%             | 0.00%    | 0.00%    | 0.00%    |

Figure S23. Detailed DP4+ probability of compound **3** calculated at mPW1PW91/6-31G\*\* level in chloroform with PCM model.

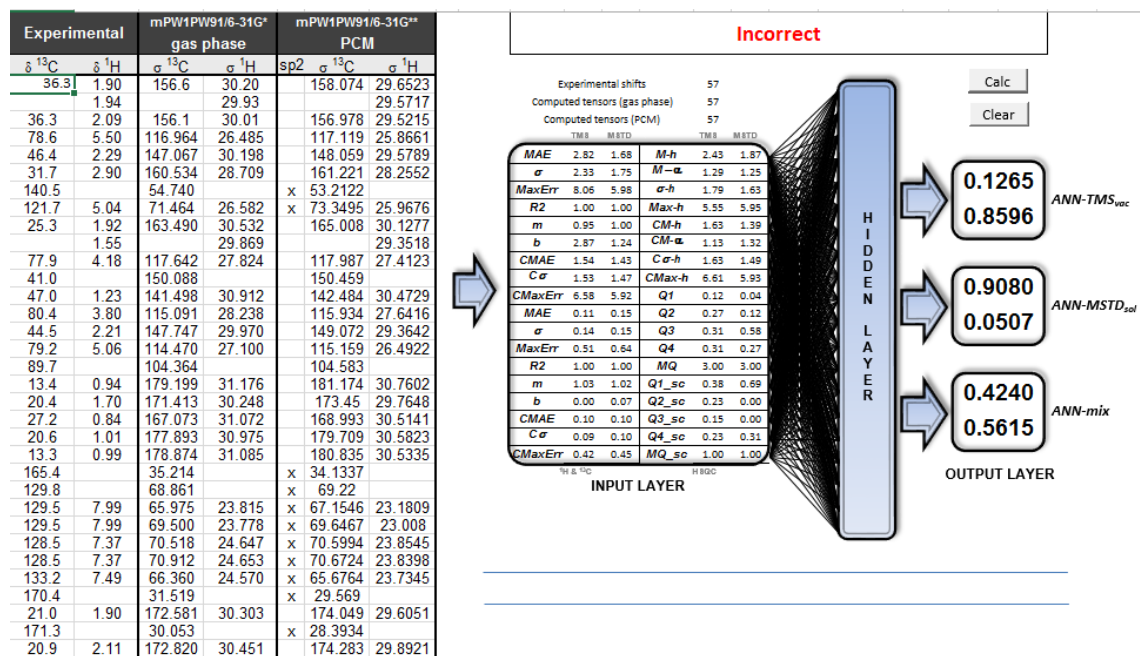

Figure S24. The result of ANN-PRA statistical analysis between compound **3** and isomer **3A**.



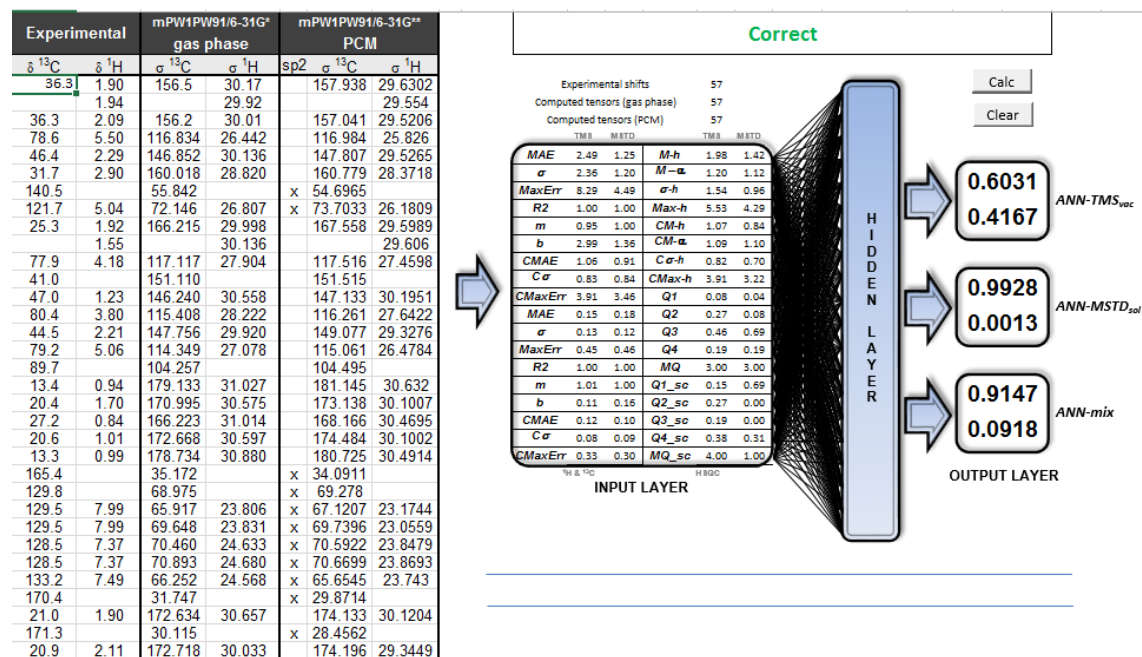

Figure S25. The result of ANN-PRA statistical analysis between compound **3** and isomer **3D**.

NMR, HRESIMS, IR, UV, CD spectra and OR report of compound 1

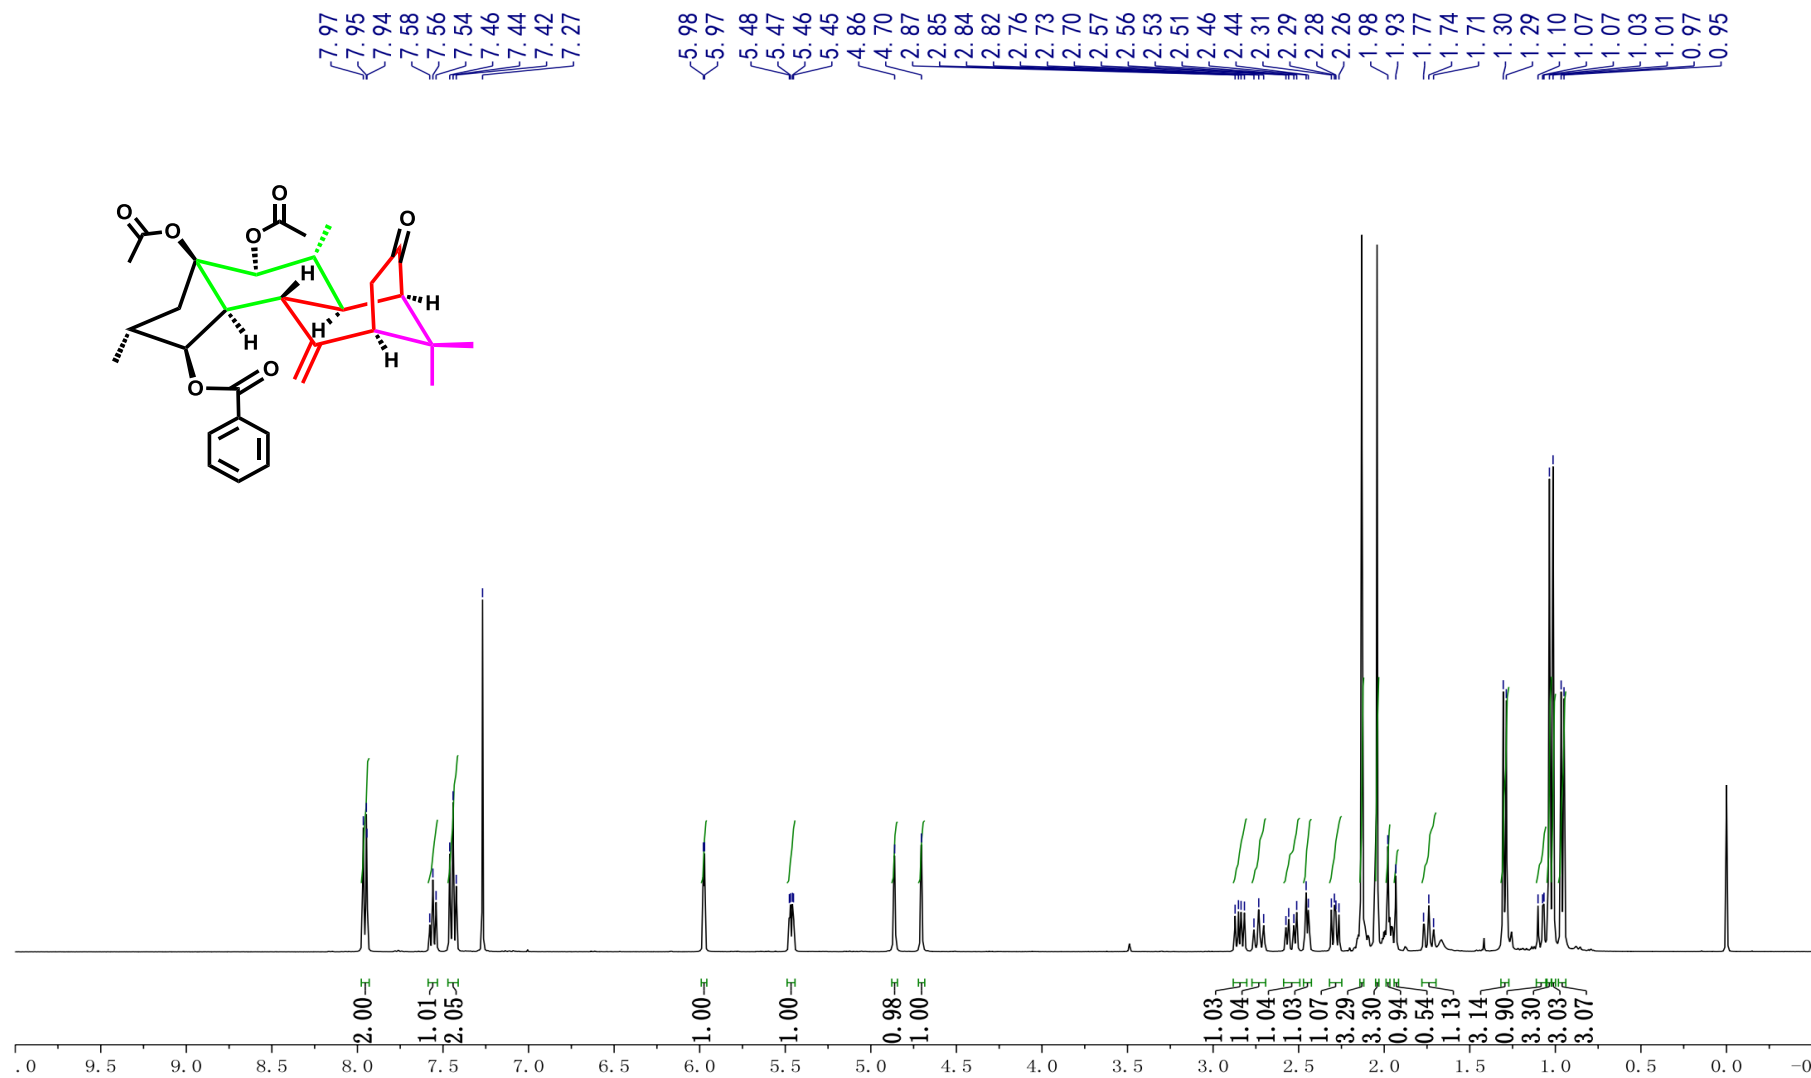

Figure S26. <sup>1</sup>H NMR spectrum of euphoria D (1) in chloroform-d (400 MHz)

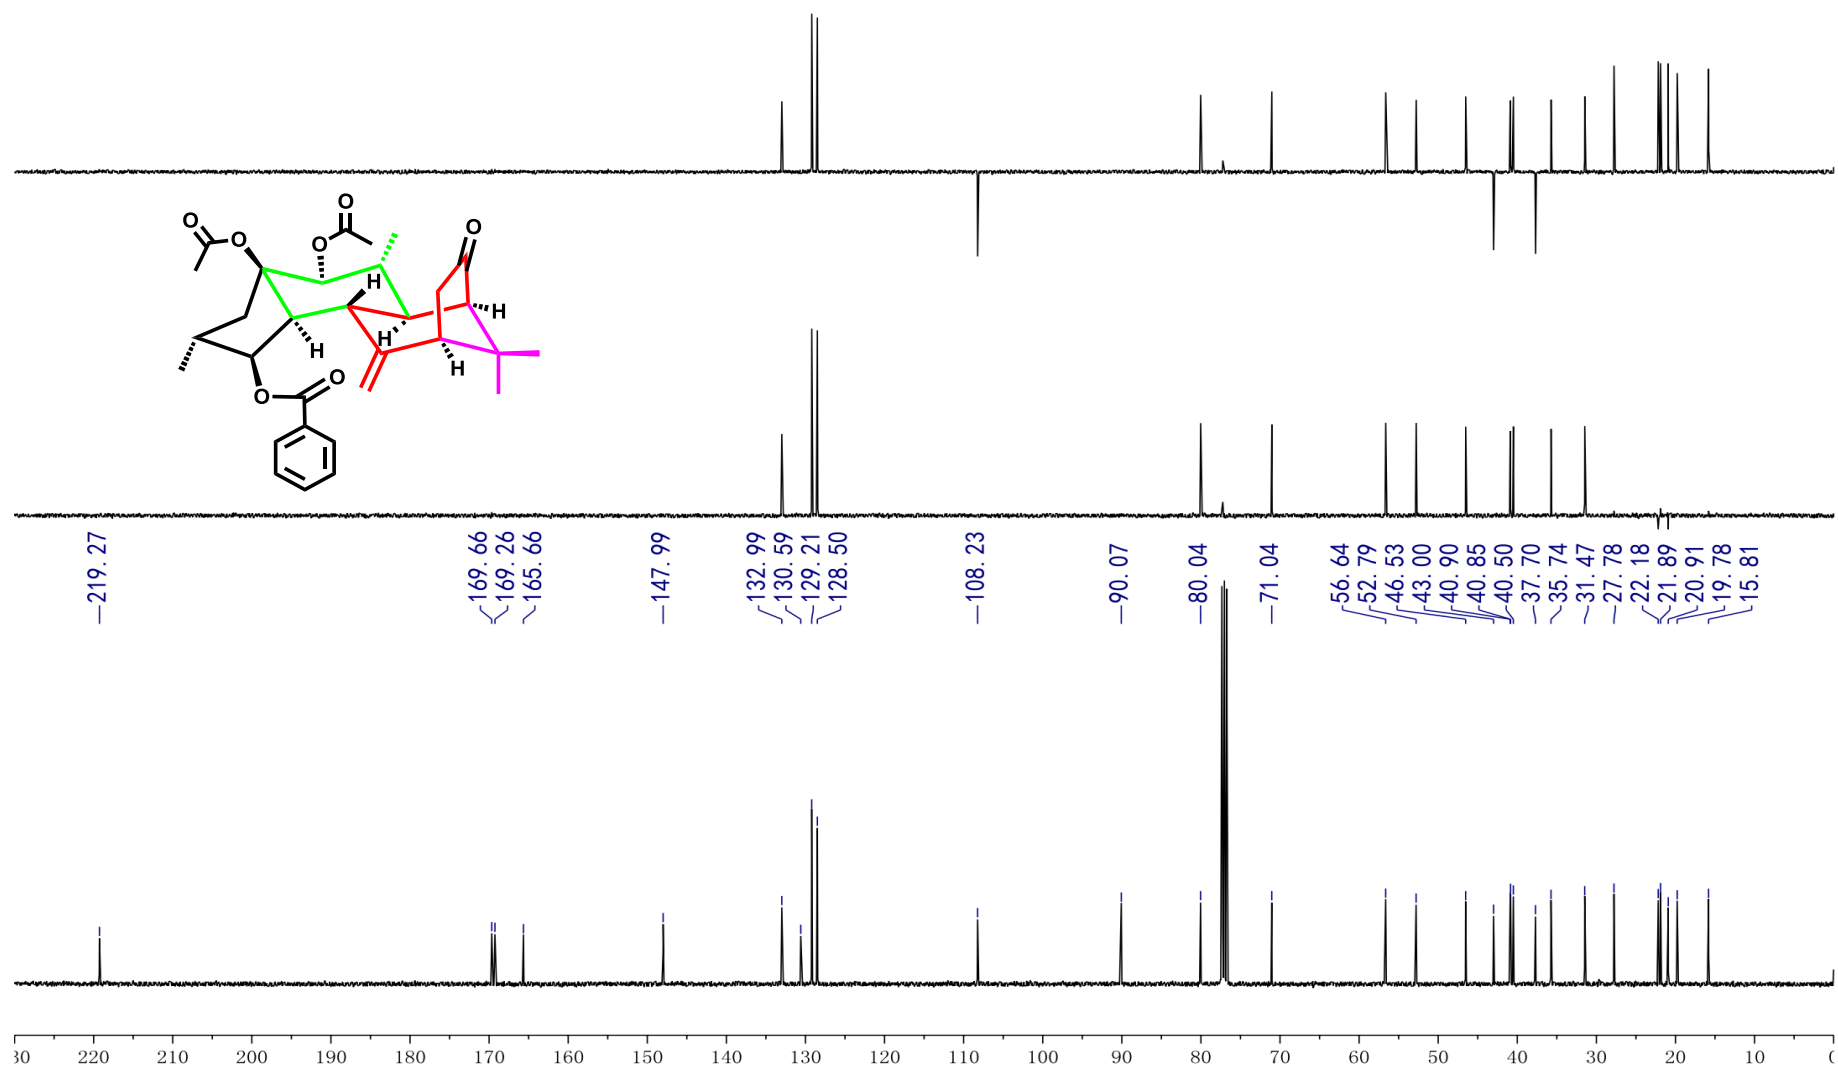

Figure S27.  $^{13}\text{C}$  and DEPT NMR spectra of euphopia D (1) in chloroform-d (100 MHz)

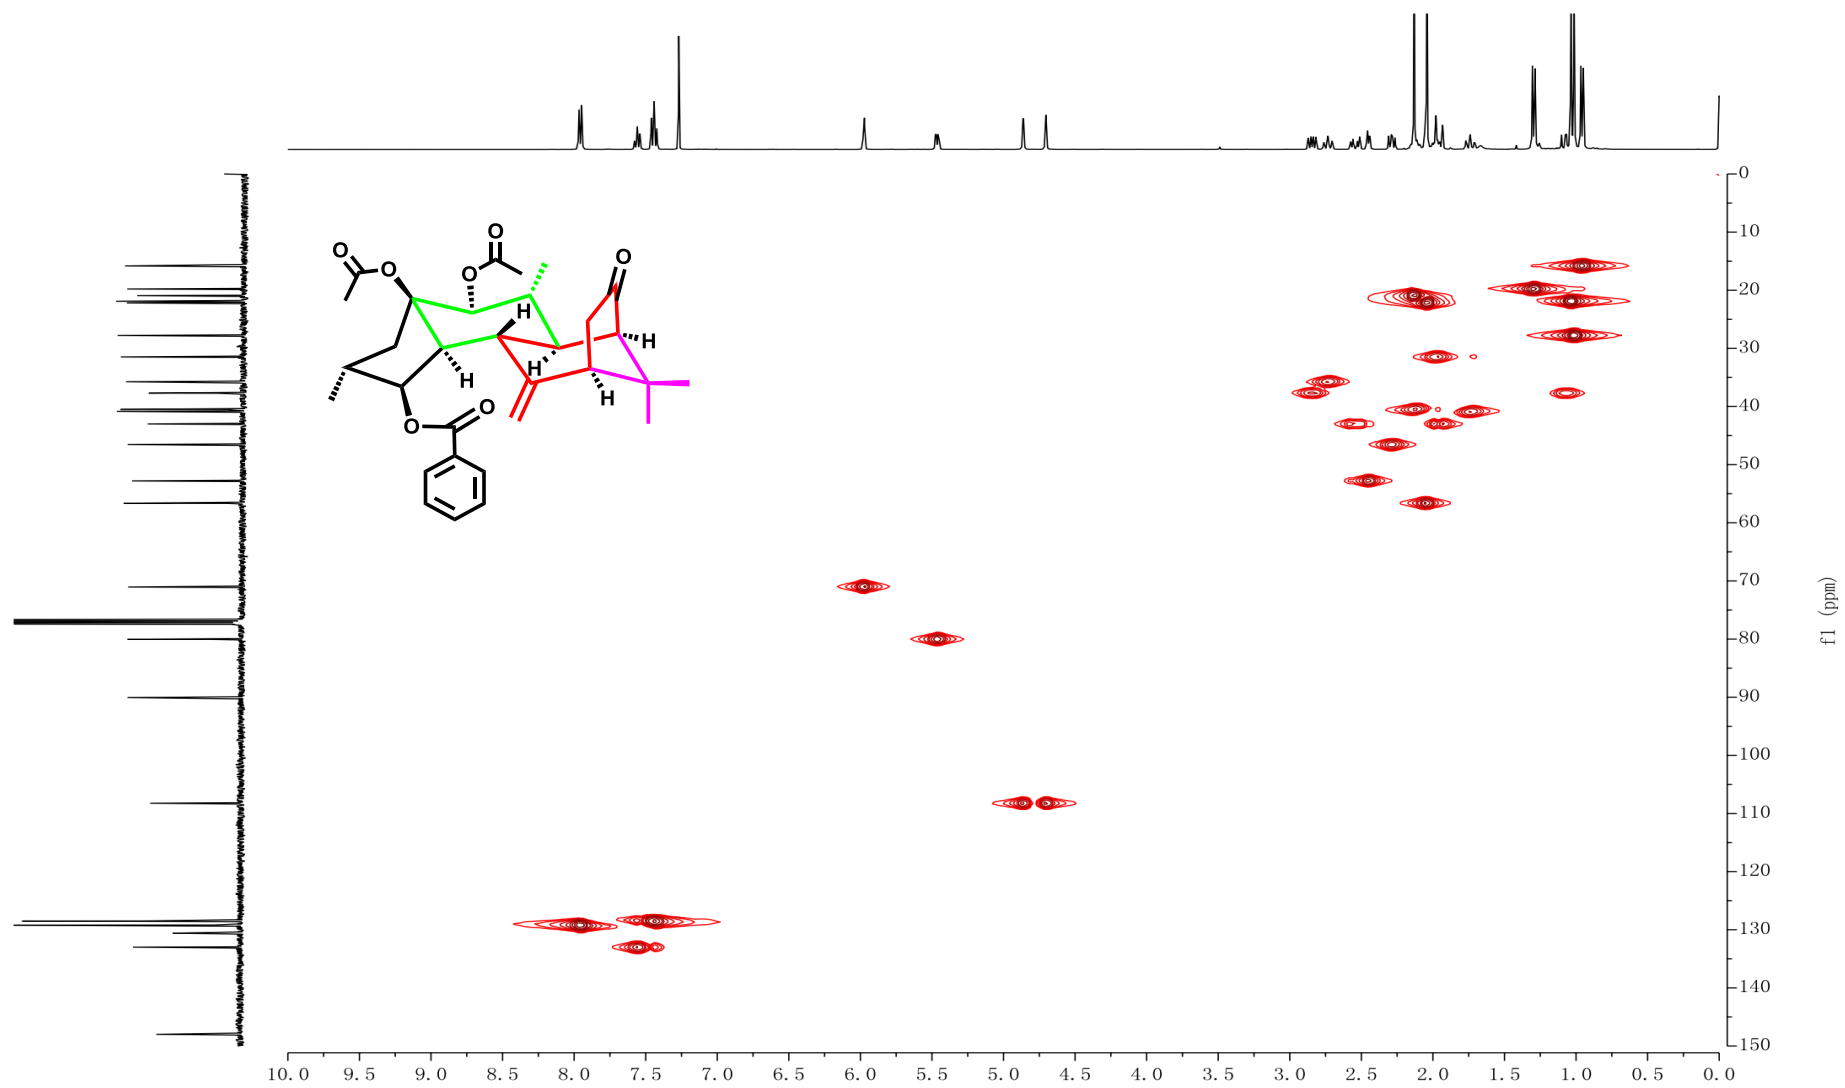

Figure S28. HSQC spectrum of euphopia D (1) in chloroform-d

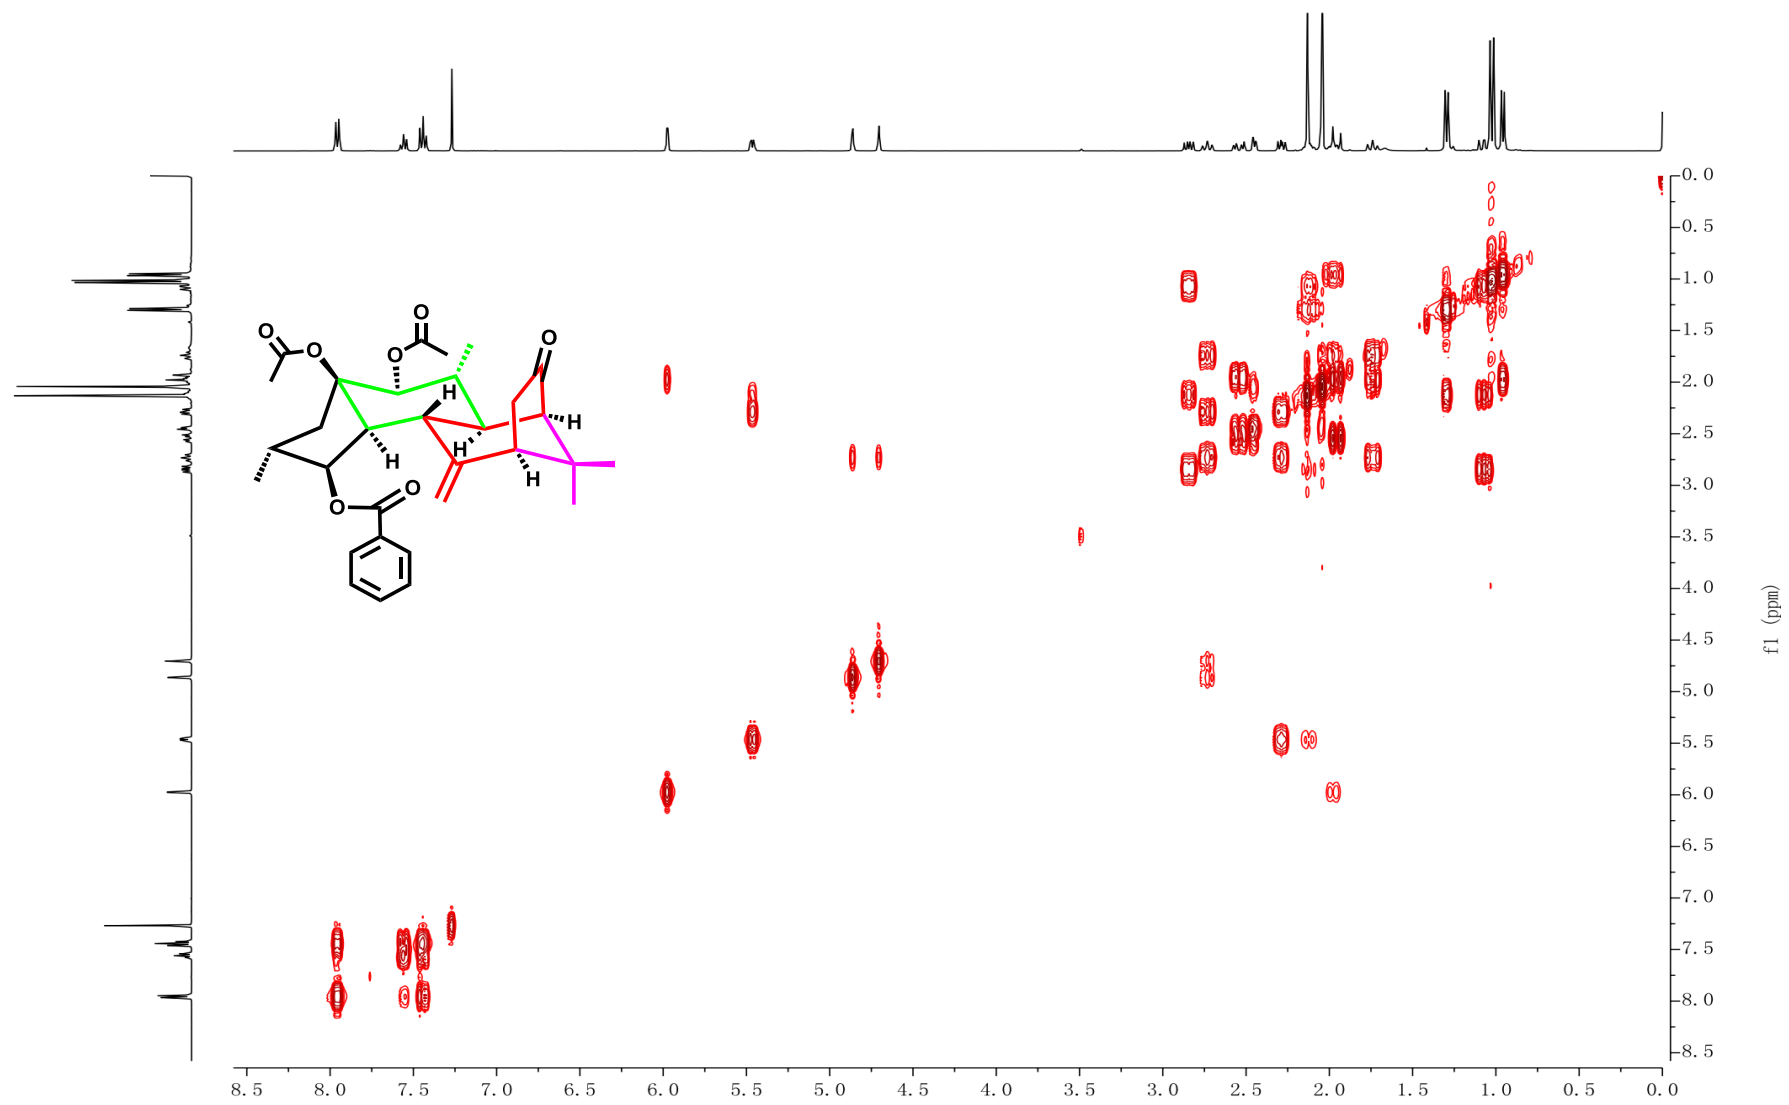

Figure S29.  $^1\text{H}$ - $^1\text{H}$  COSY spectrum of euphopia D (1) in chloroform-d

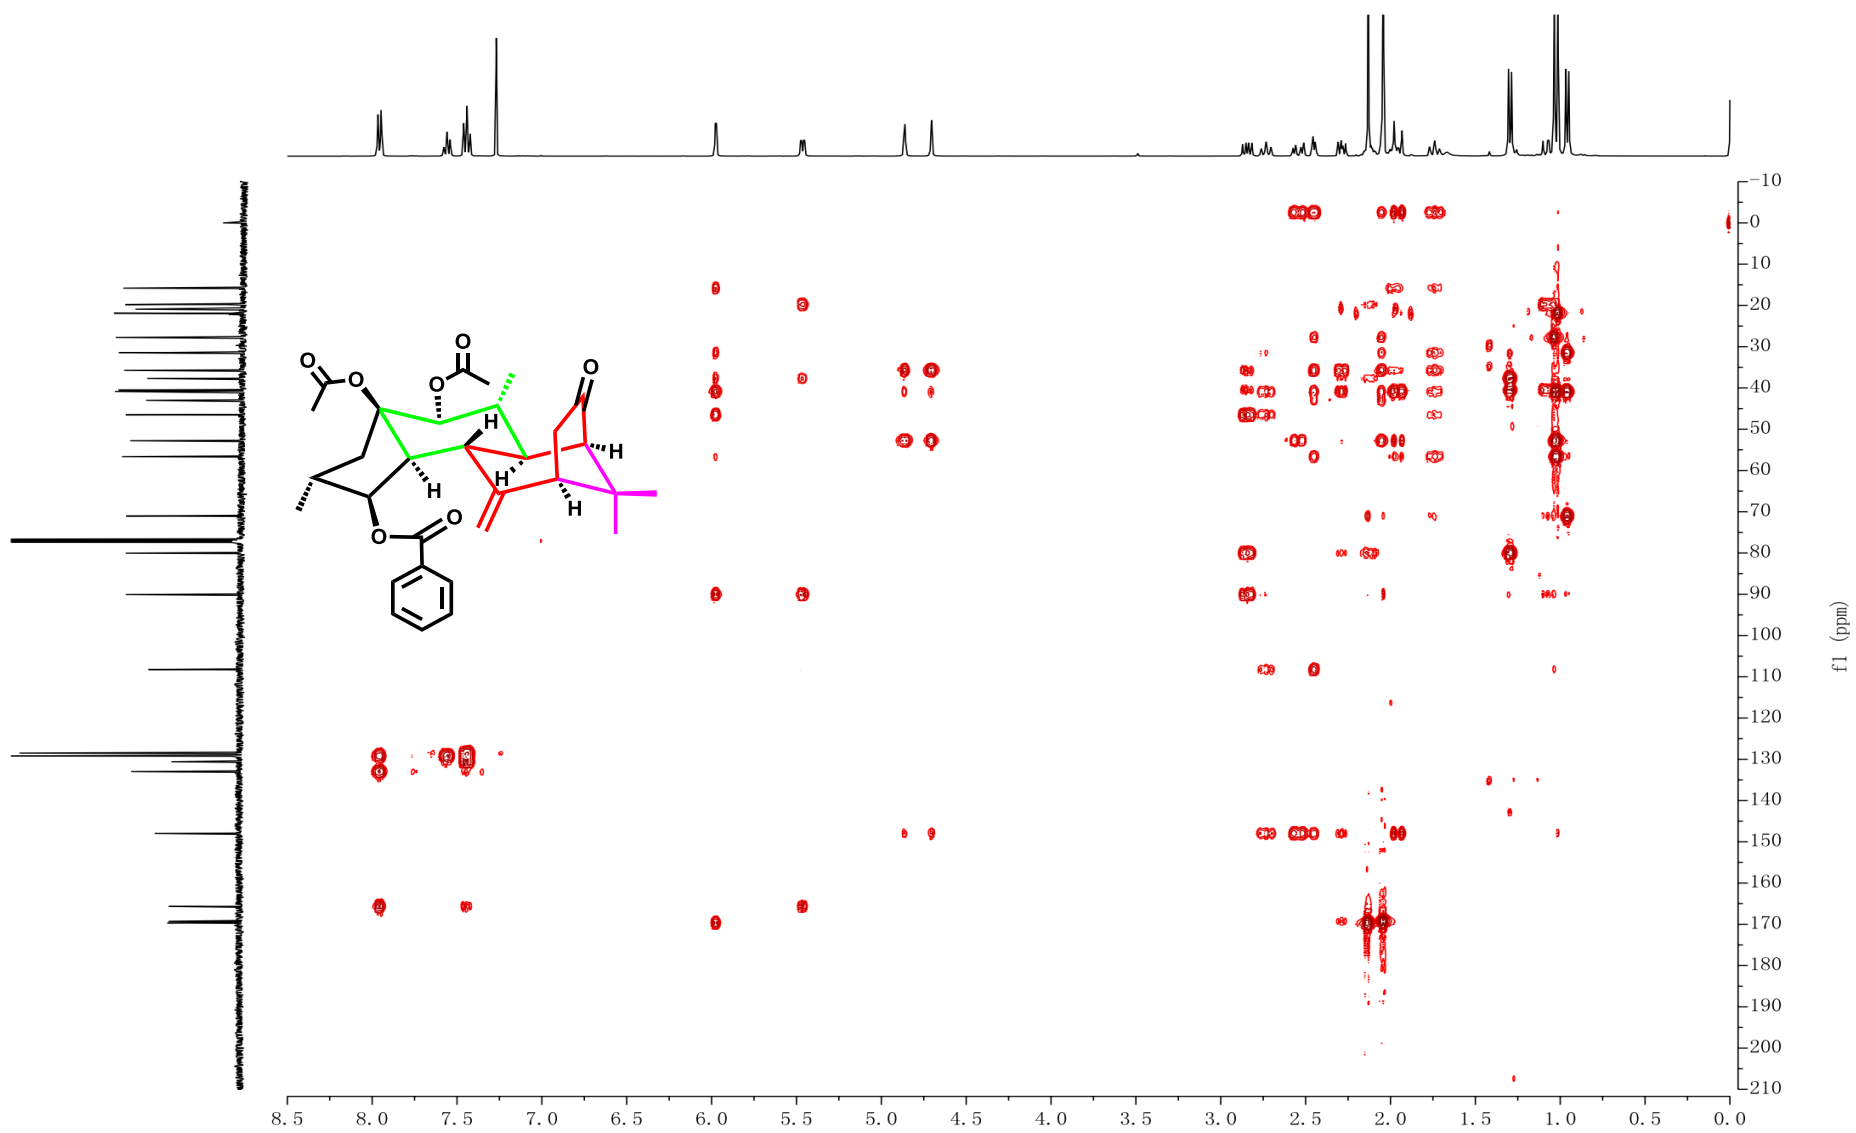

Figure S30. HMBC spectrum of euphoria D (1) in chloroform-d

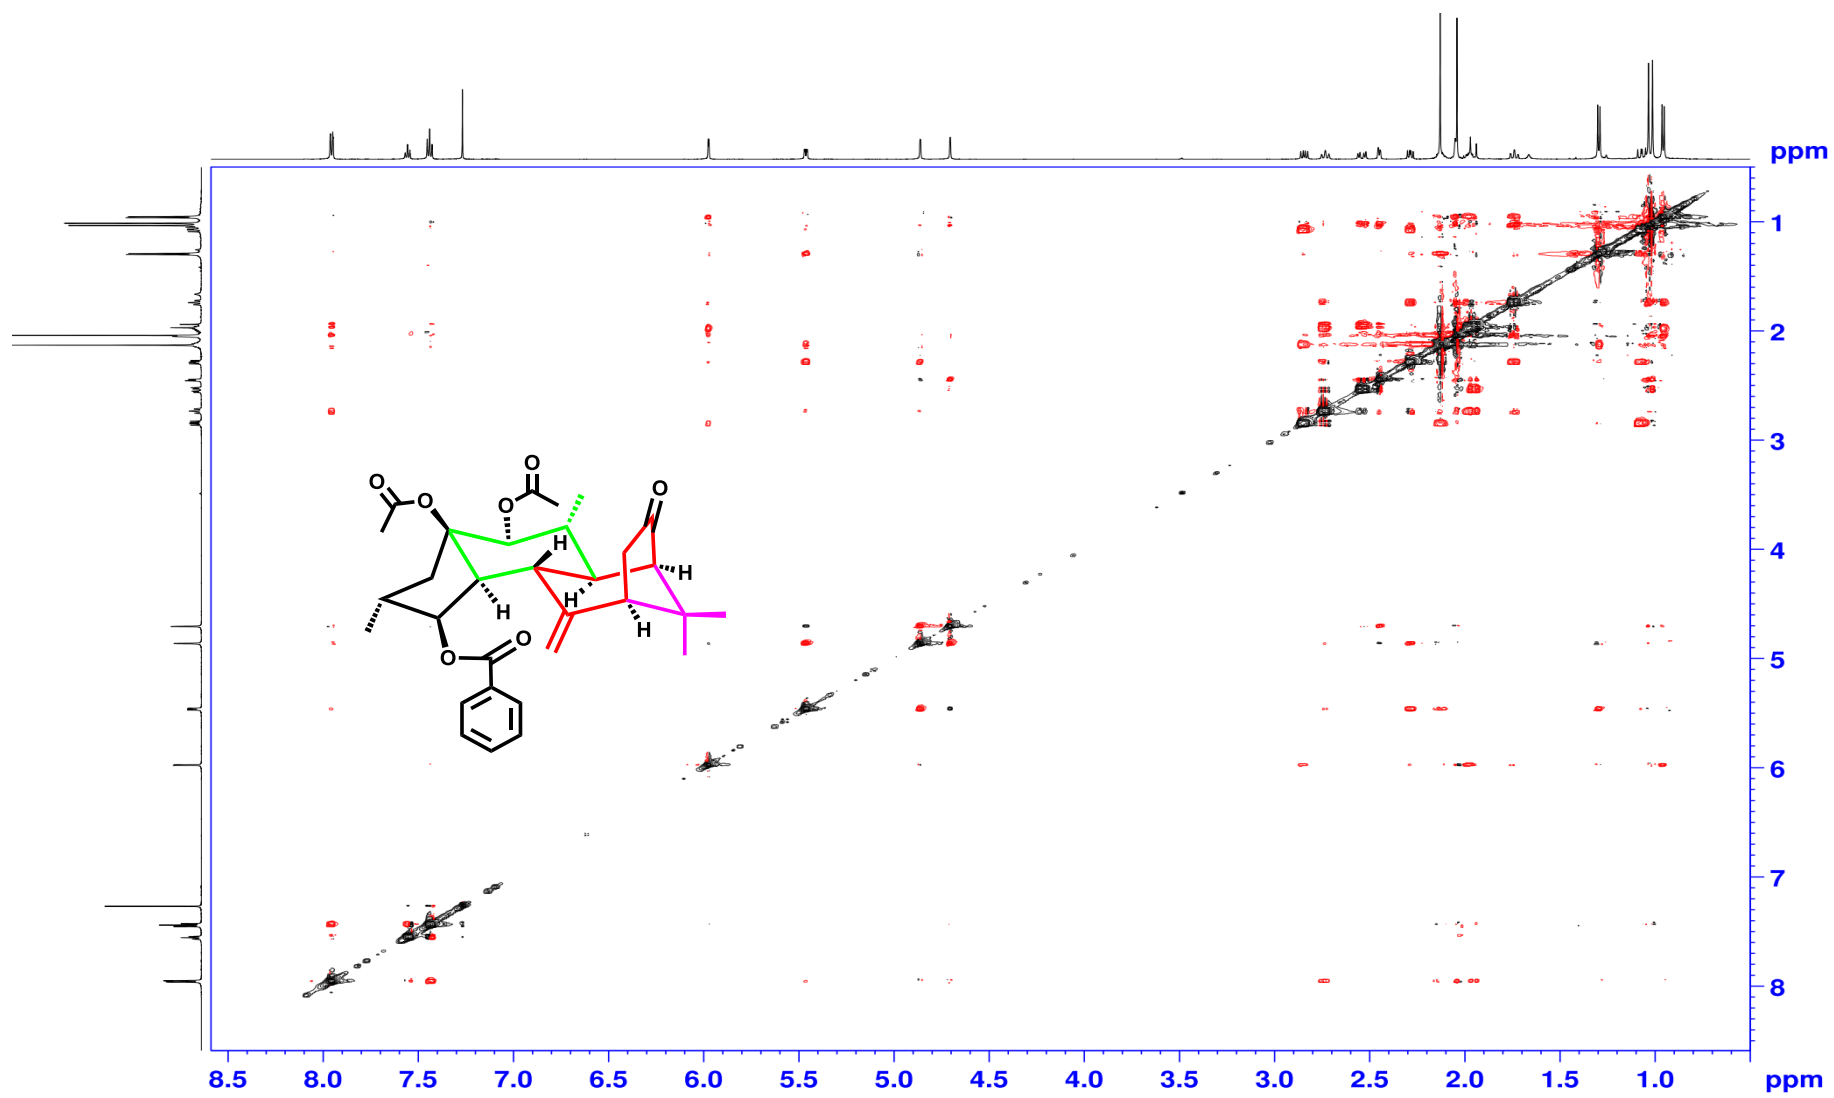

Figure S31. ROESY spectrum of euphopia D (1) in chloroform-d

SEH-3 #48 RT: 1.03 AV: 1 NL: 1.94E7  
T: FTMS + c ESI Full ms [100.00-1000.00]

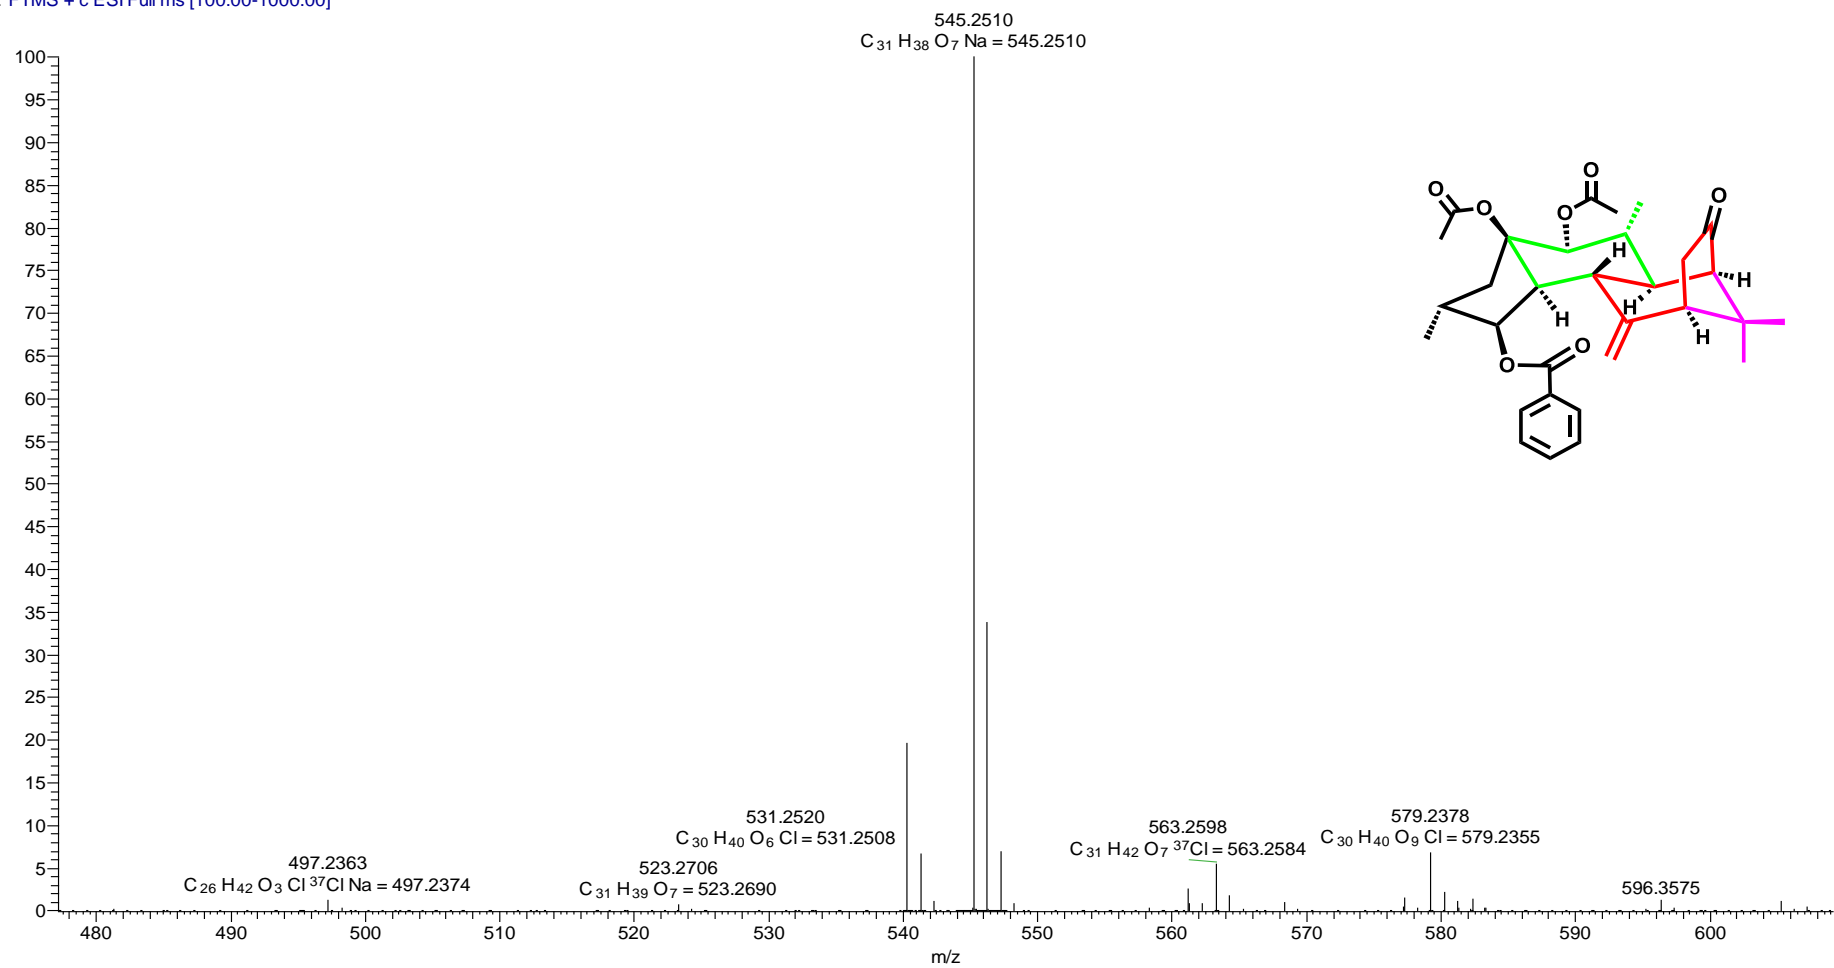

Figure S32. HRESIMS spectrum of euphoria D (1)



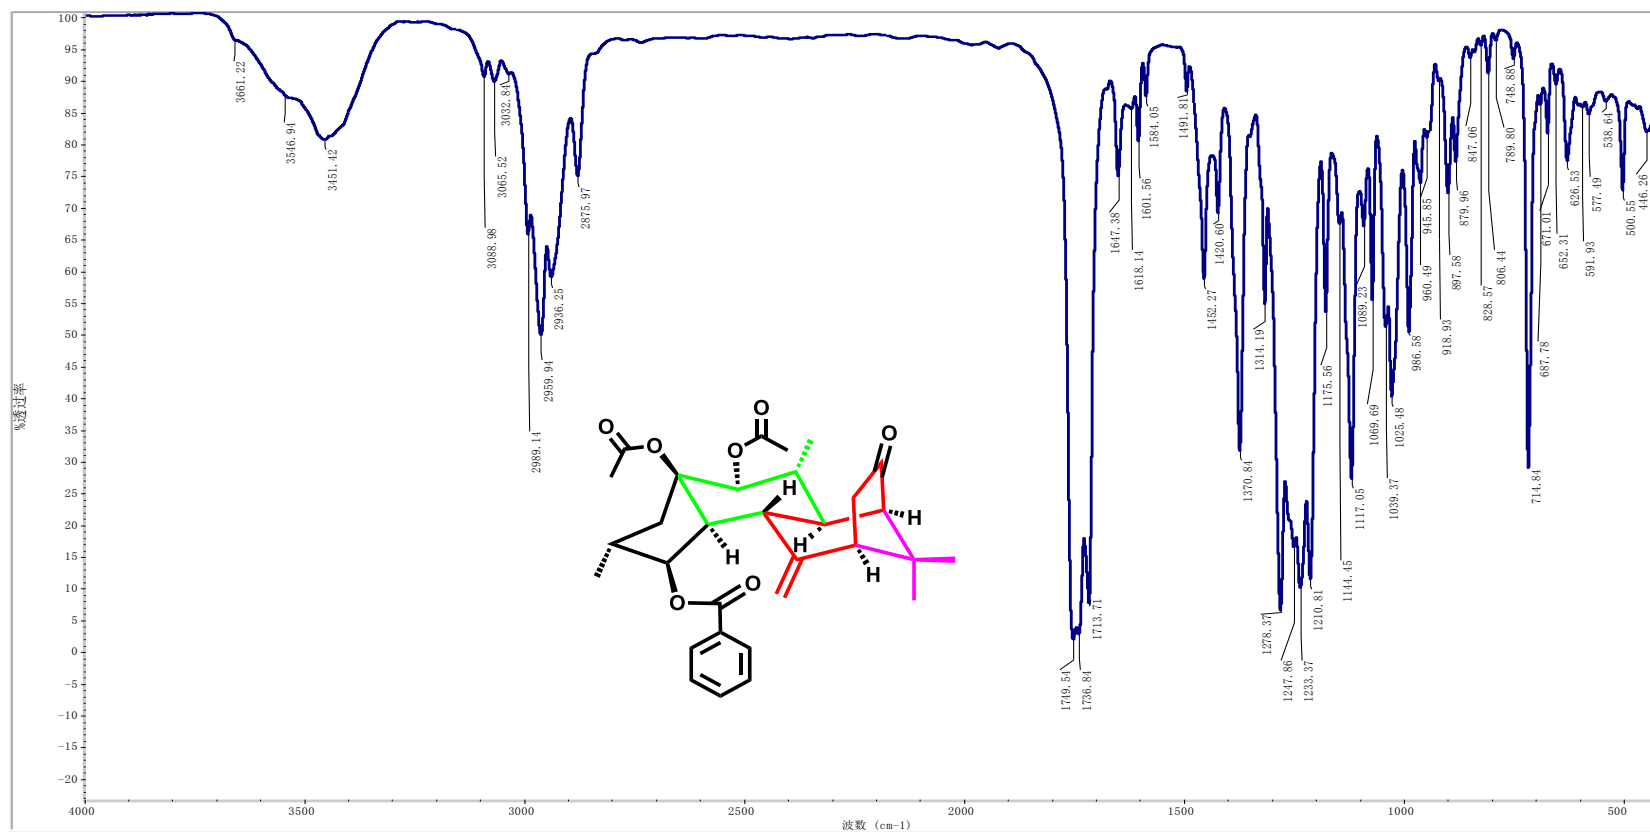

Sample Name: SEH-3  
 KBr压片  
 采集时间: 星期五 10月 09 15:51:28 2020 (GMT+08:00)  
 仪器型号: NICOLET iS10  
 Software version: OMNIC 9.8.372

样品扫描次数: 16  
 背景扫描次数: 16  
 分辨率: 4.000  
 采样增益: 1.0  
 动镜速度: 0.4747  
 光阑: 80.00

Figure S33. IR spectrum of euphopia D (1)

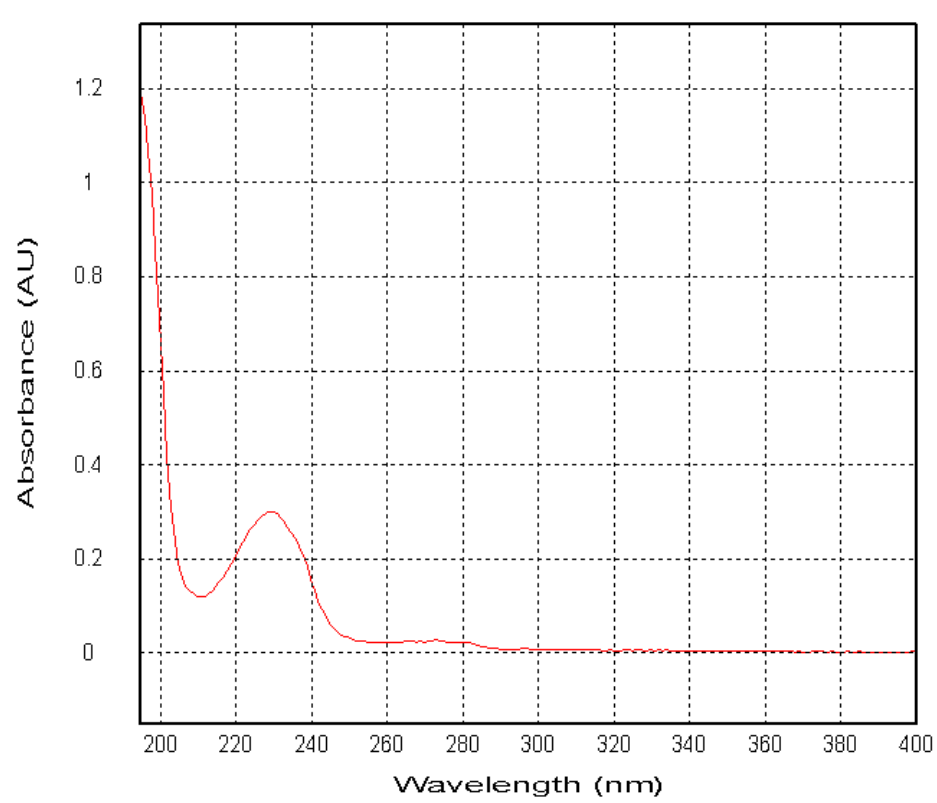

Subtracted:0

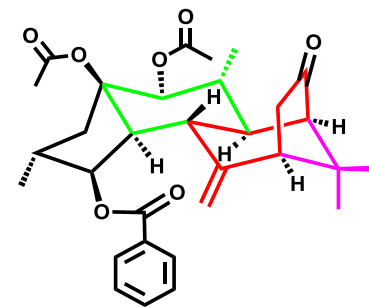

Figure S34. UV spectrum of euphoria D (1)

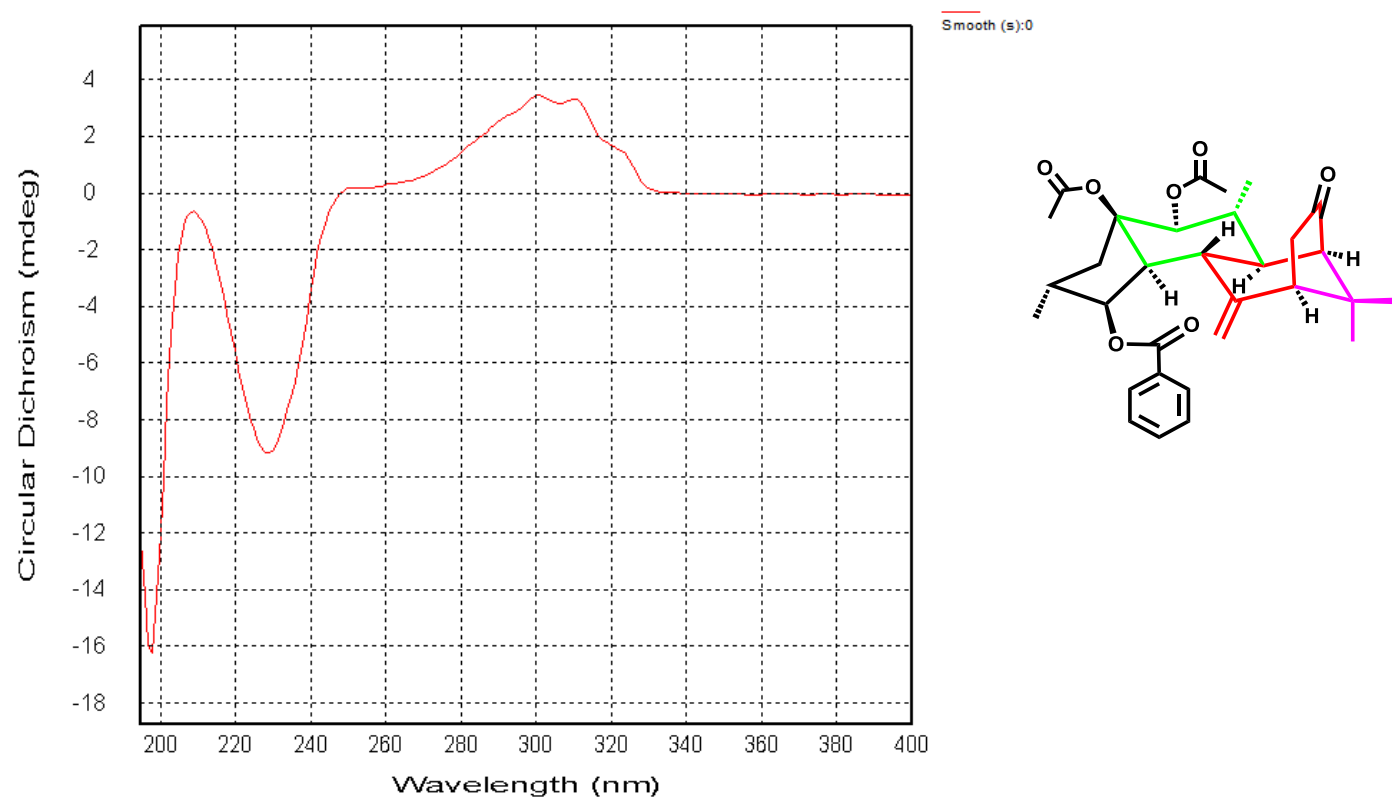

Figure S35. CD spectrum of euphoria D (1)

## Rudolph Research Analytical

This sample was measured on an Autopol VI, Serial #91058  
Manufactured by Rudolph Research Analytical, Hackettstown, NJ, USA.

Measurement Date : Wednesday, 14-OCT-2020

Set Temperature : OFF

Time Delay : Disabled

Delay between Measurement : Disabled

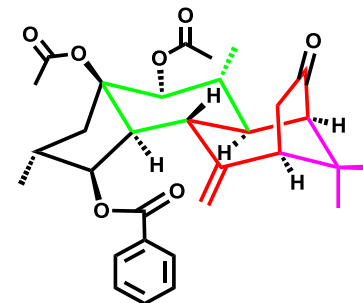

| <u>n</u> | <u>Average</u> | <u>Std.Dev.</u> | <u>% RSD</u> | <u>Maximum</u> | <u>Minimum</u> |
|----------|----------------|-----------------|--------------|----------------|----------------|
| 5        | -12.36         | 1.04            | -8.41        | -11.20         | -13.30         |

| <u>S.No</u> | <u>Sample ID</u> | <u>Time</u> | <u>Result</u> | <u>Scale</u> | <u>OR °Arc</u> | <u>WLG.nm</u> | <u>Lg.mm</u> | <u>Conc.g/100ml</u> | <u>Temp.</u> |
|-------------|------------------|-------------|---------------|--------------|----------------|---------------|--------------|---------------------|--------------|
| 1           | SEH-3            | 07:37:25 PM | -13.30        | SR           | -0.0133        | 589           | 100.00       | 0.100               | 24.0         |
| 2           | SEH-3            | 07:37:34 PM | -12.70        | SR           | -0.0127        | 589           | 100.00       | 0.100               | 24.0         |
| 3           | SEH-3            | 07:37:42 PM | -13.30        | SR           | -0.0133        | 589           | 100.00       | 0.100               | 24.0         |
| 4           | SEH-3            | 07:37:59 PM | -11.20        | SR           | -0.0112        | 589           | 100.00       | 0.100               | 24.0         |
| 5           | SEH-3            | 07:38:07 PM | -11.30        | SR           | -0.0113        | 589           | 100.00       | 0.100               | 24.0         |

Figure S36. OR report of euphoria D (1)

# NMR, HRESIMS, IR, UV, CD spectra and OR report of compound 2

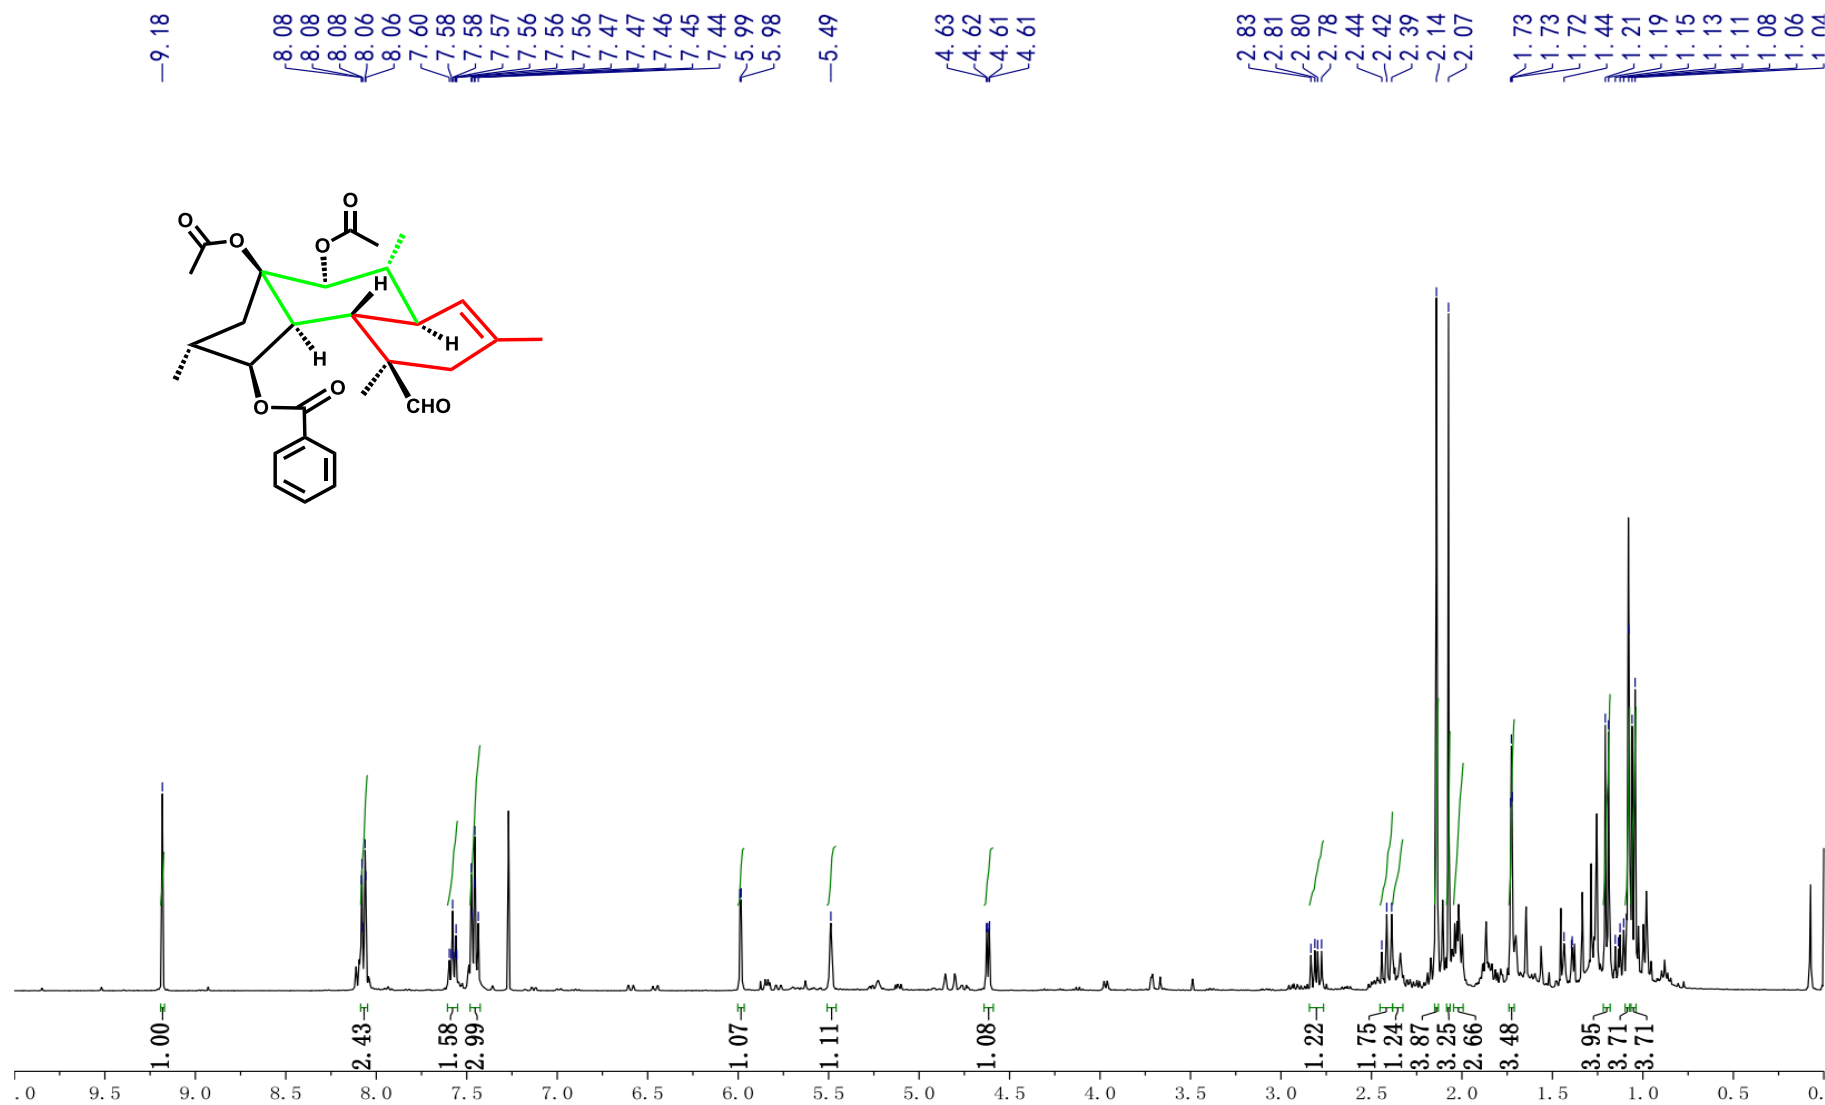

Figure S37. <sup>1</sup>H NMR spectrum of euphoria E (2) in chloroform-d (400 MHz)

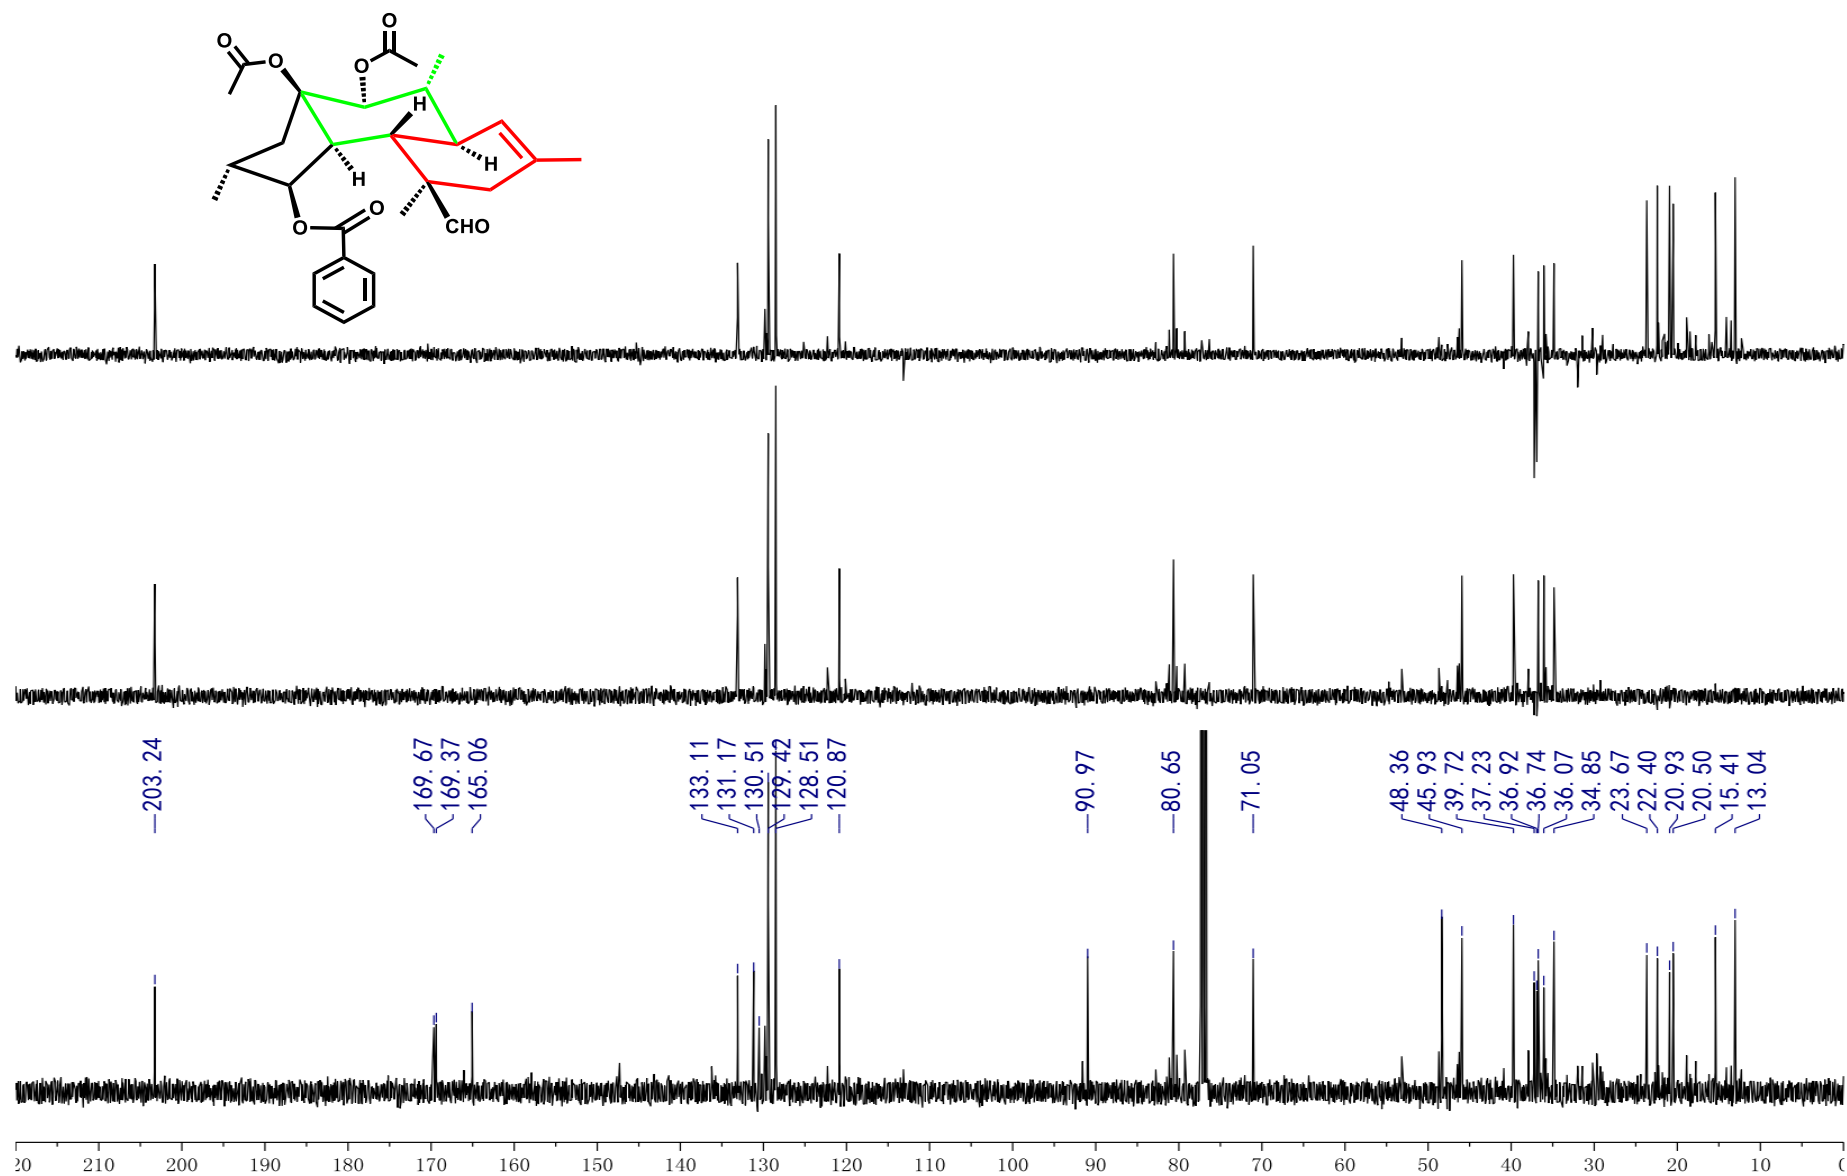

Figure S38.  $^{13}\text{C}$  and DEPT NMR spectra of euphoria E (2) in chloroform-d (100 MHz)

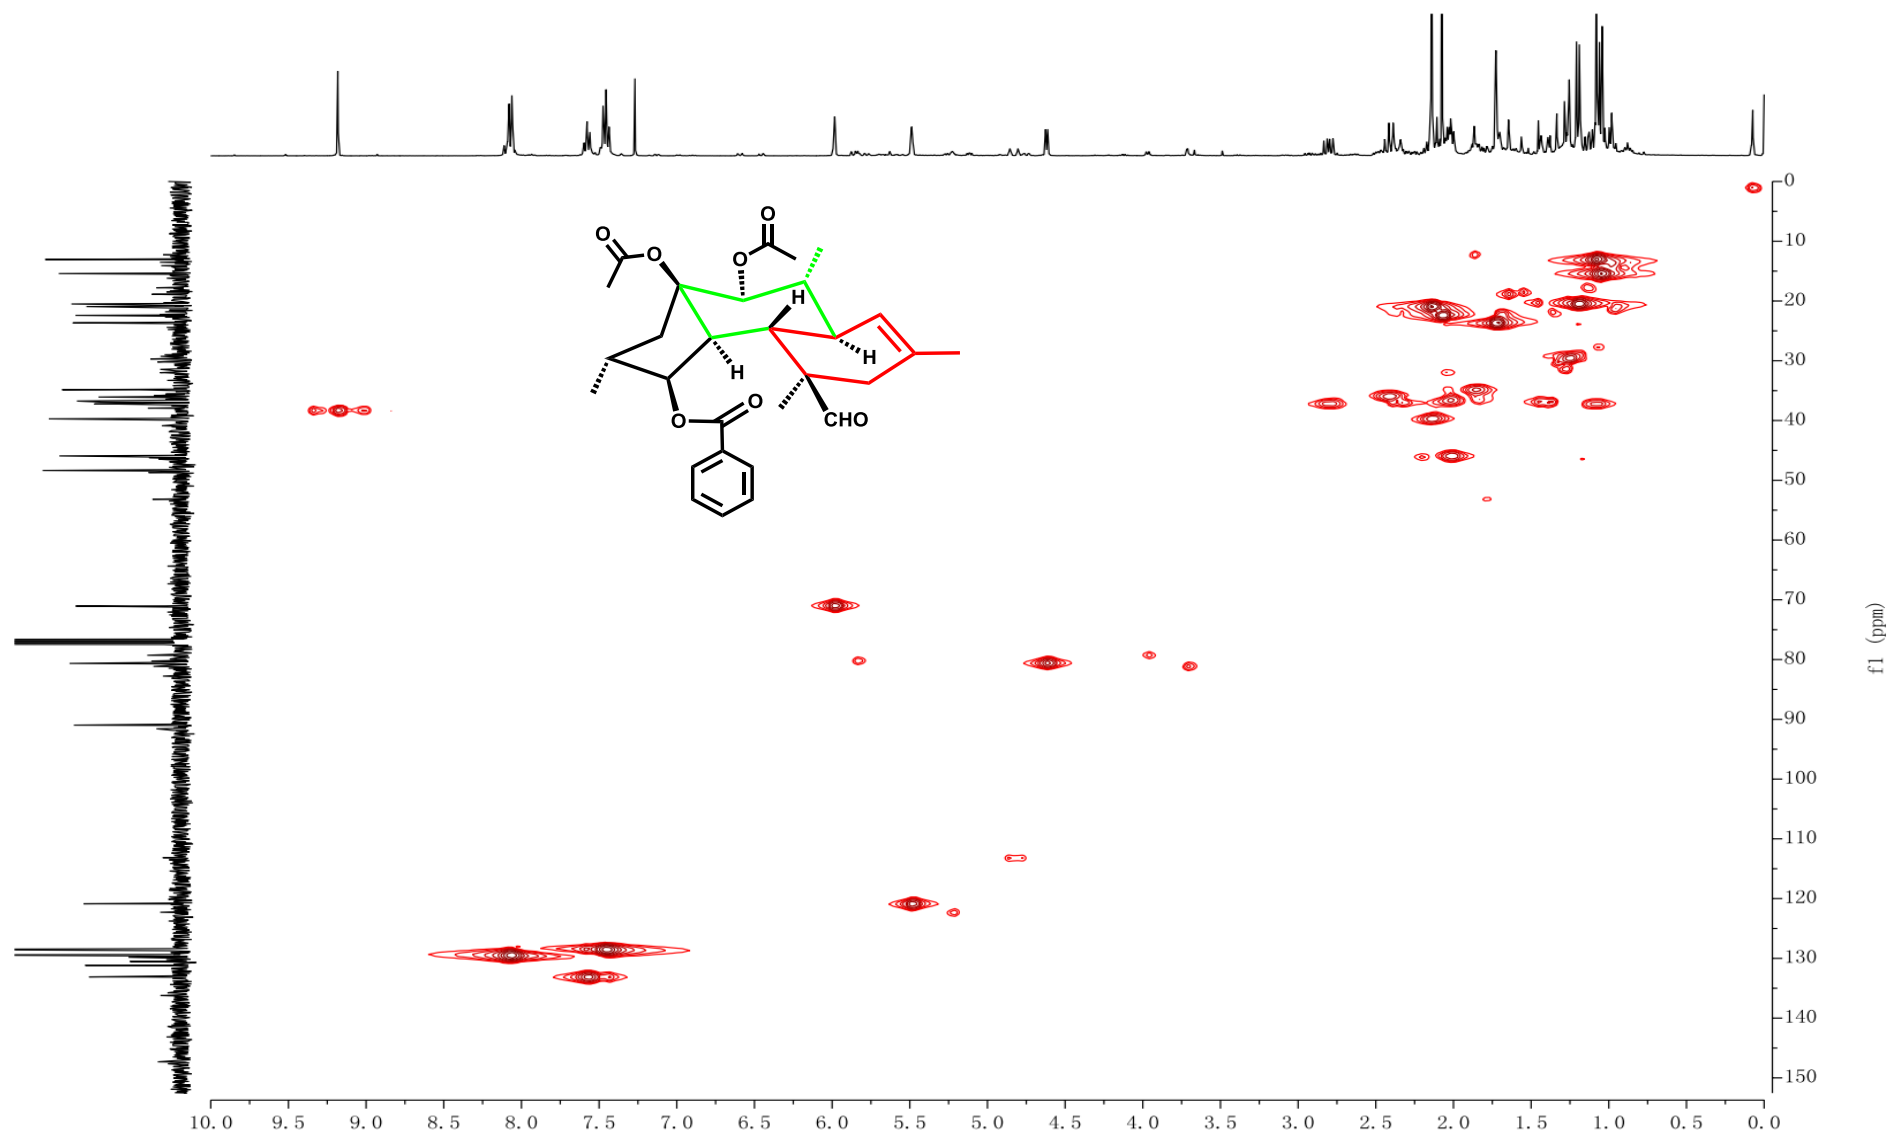

Figure S39. HSQC spectrum of euphopia E (2) in chloroform-d

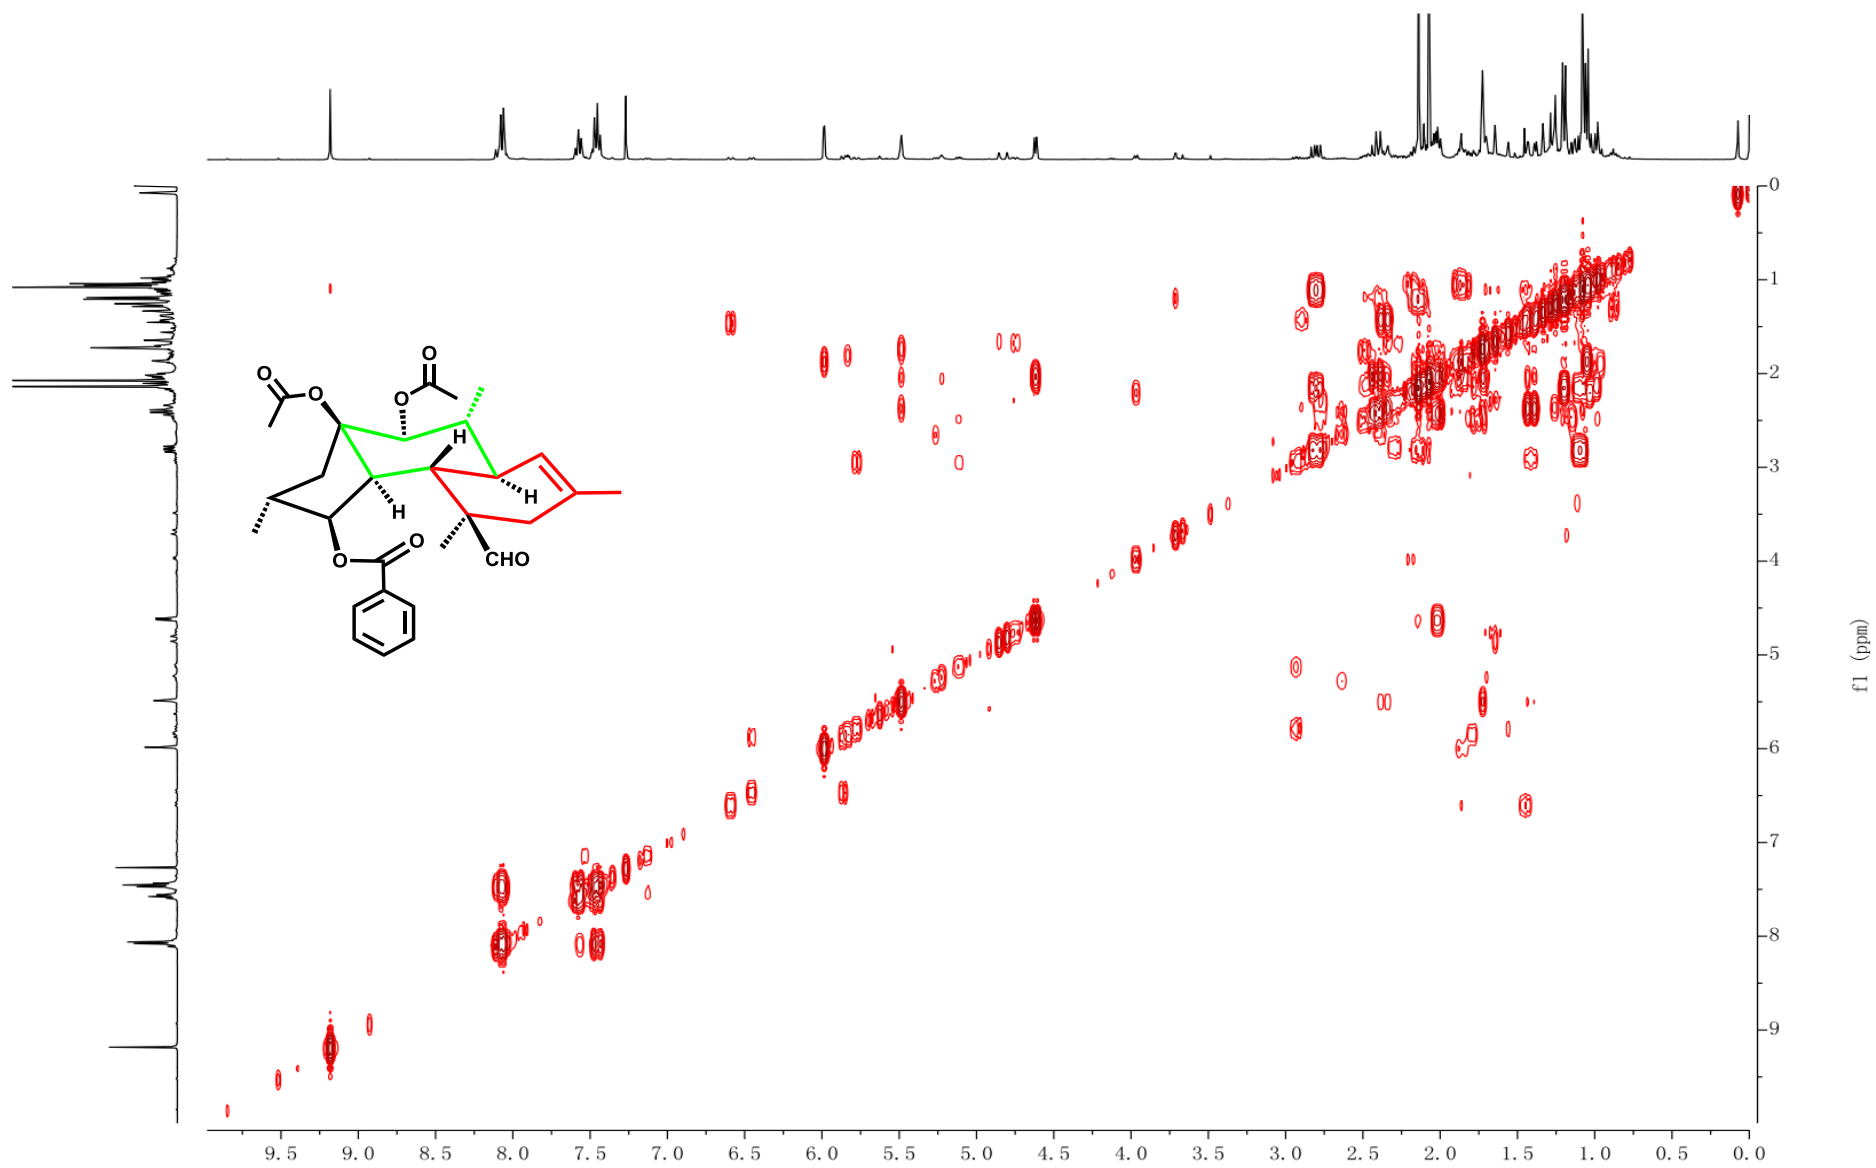

Figure S40.  $^1\text{H}$ - $^1\text{H}$  COSY NMR spectrum of euphoria E (2) in chloroform-d



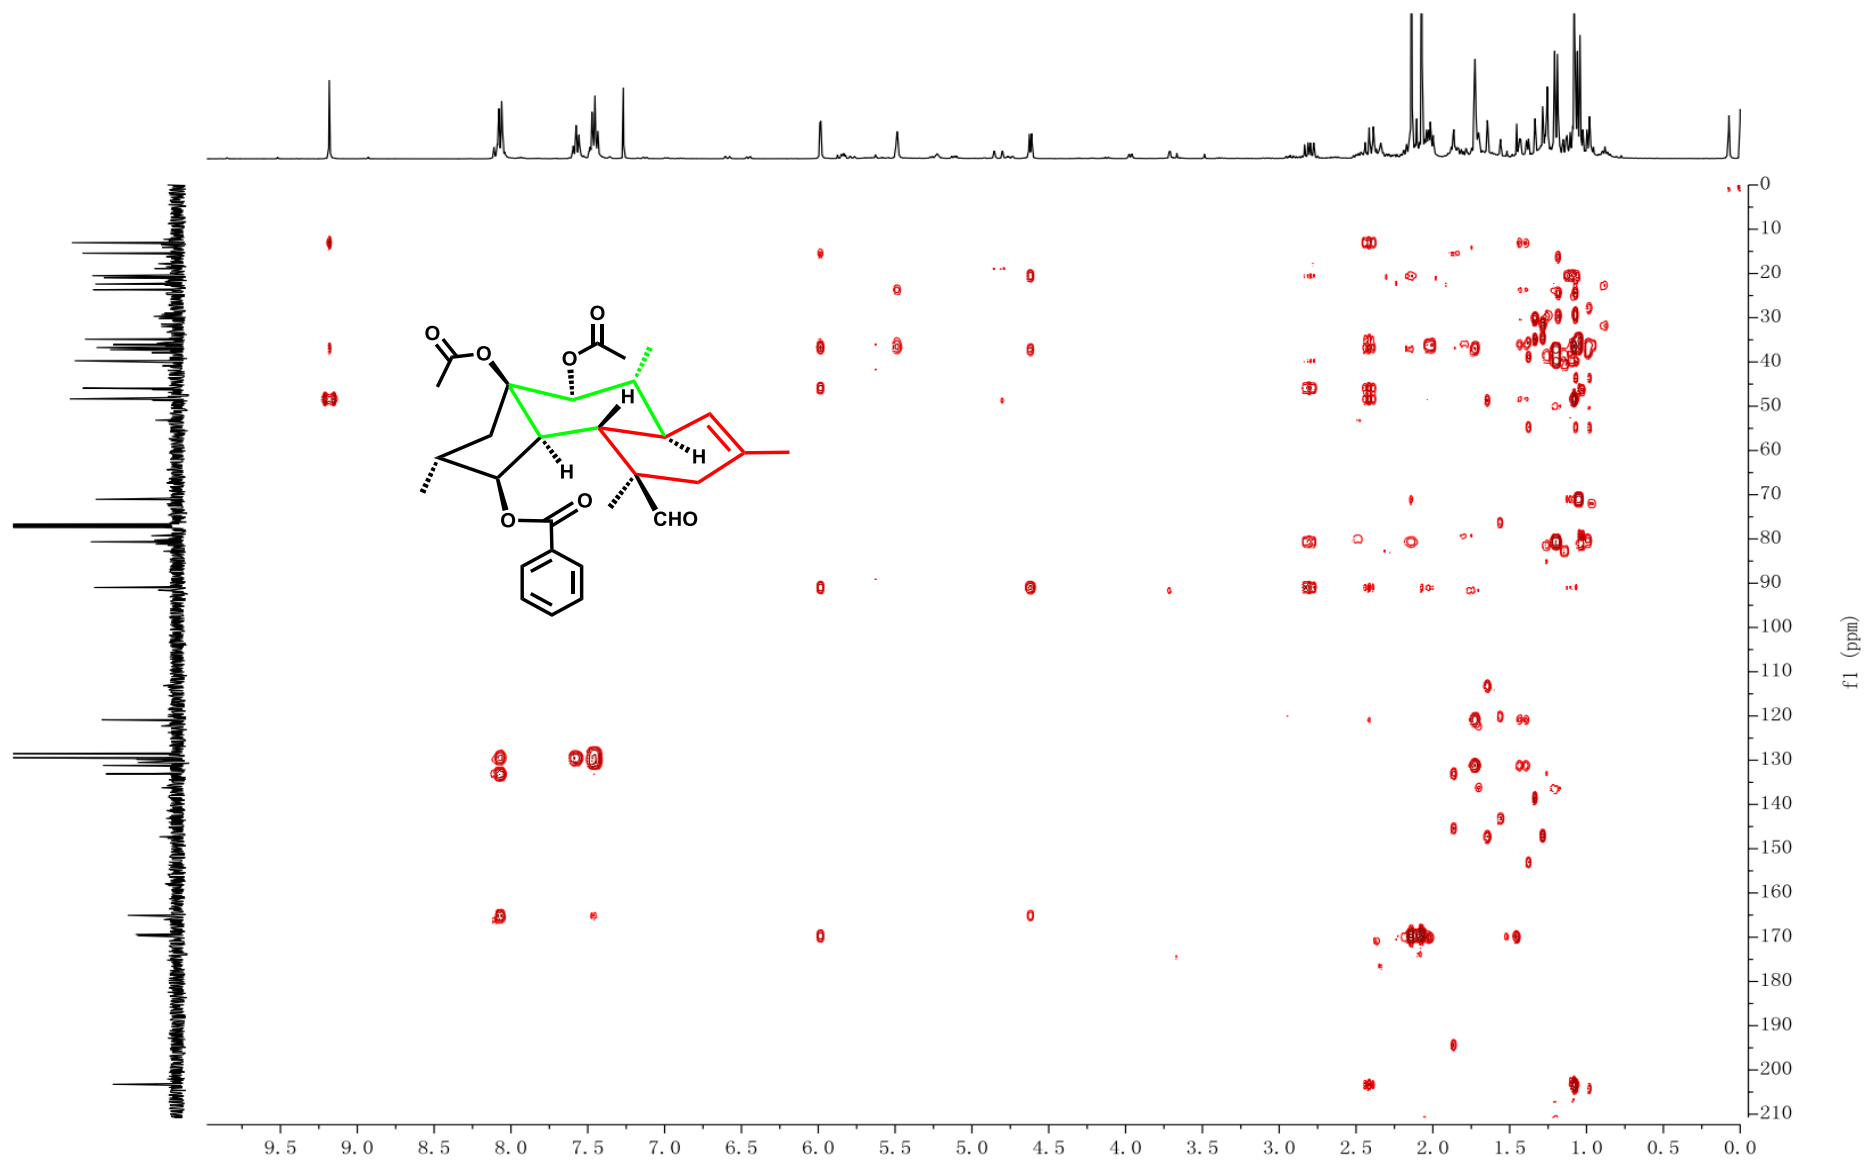

Figure S41. HMBC spectrum of euphoria E (2) in chloroform-d

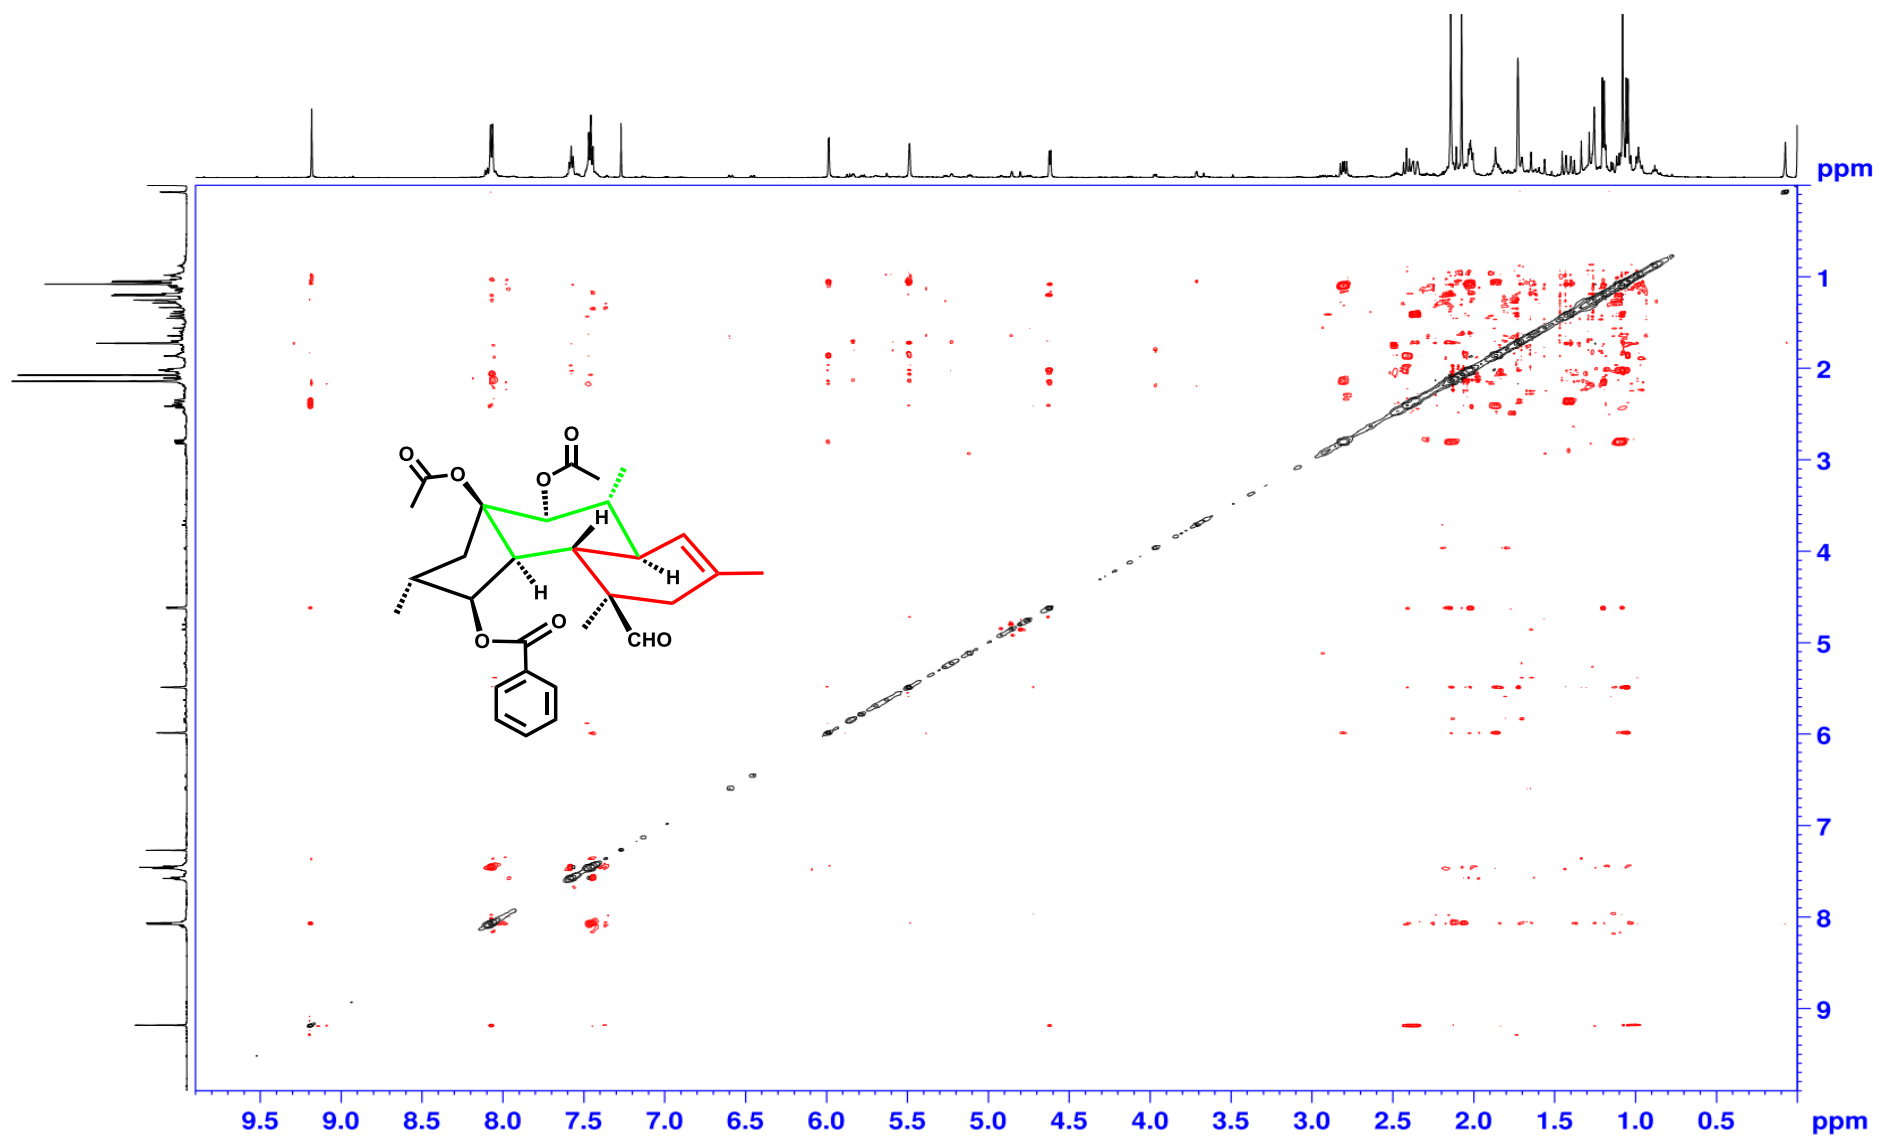

Figure S42. ROESY spectrum of euphopia E (2) in chloroform-d

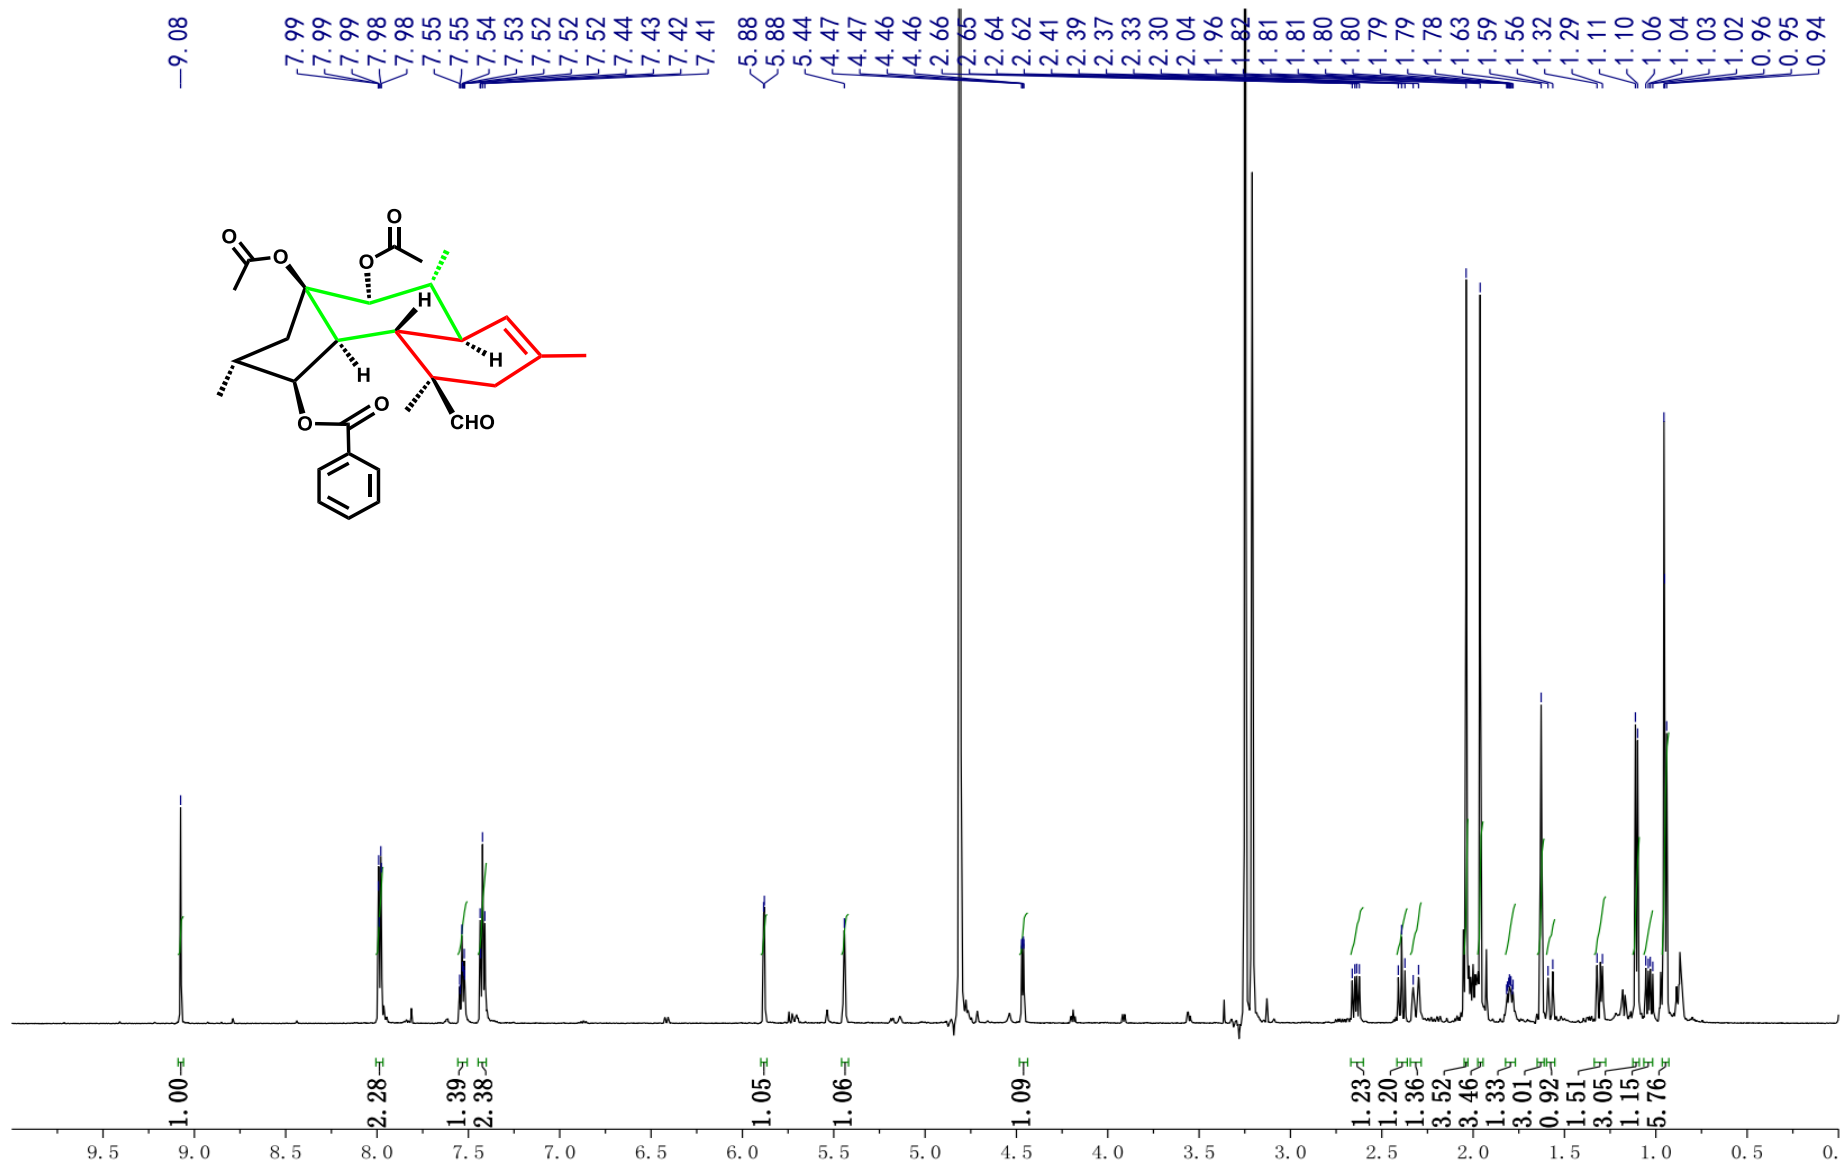

Figure S43. <sup>1</sup>H NMR spectrum of euphoria E (2) in methanol-d<sub>4</sub> (600 MHz)

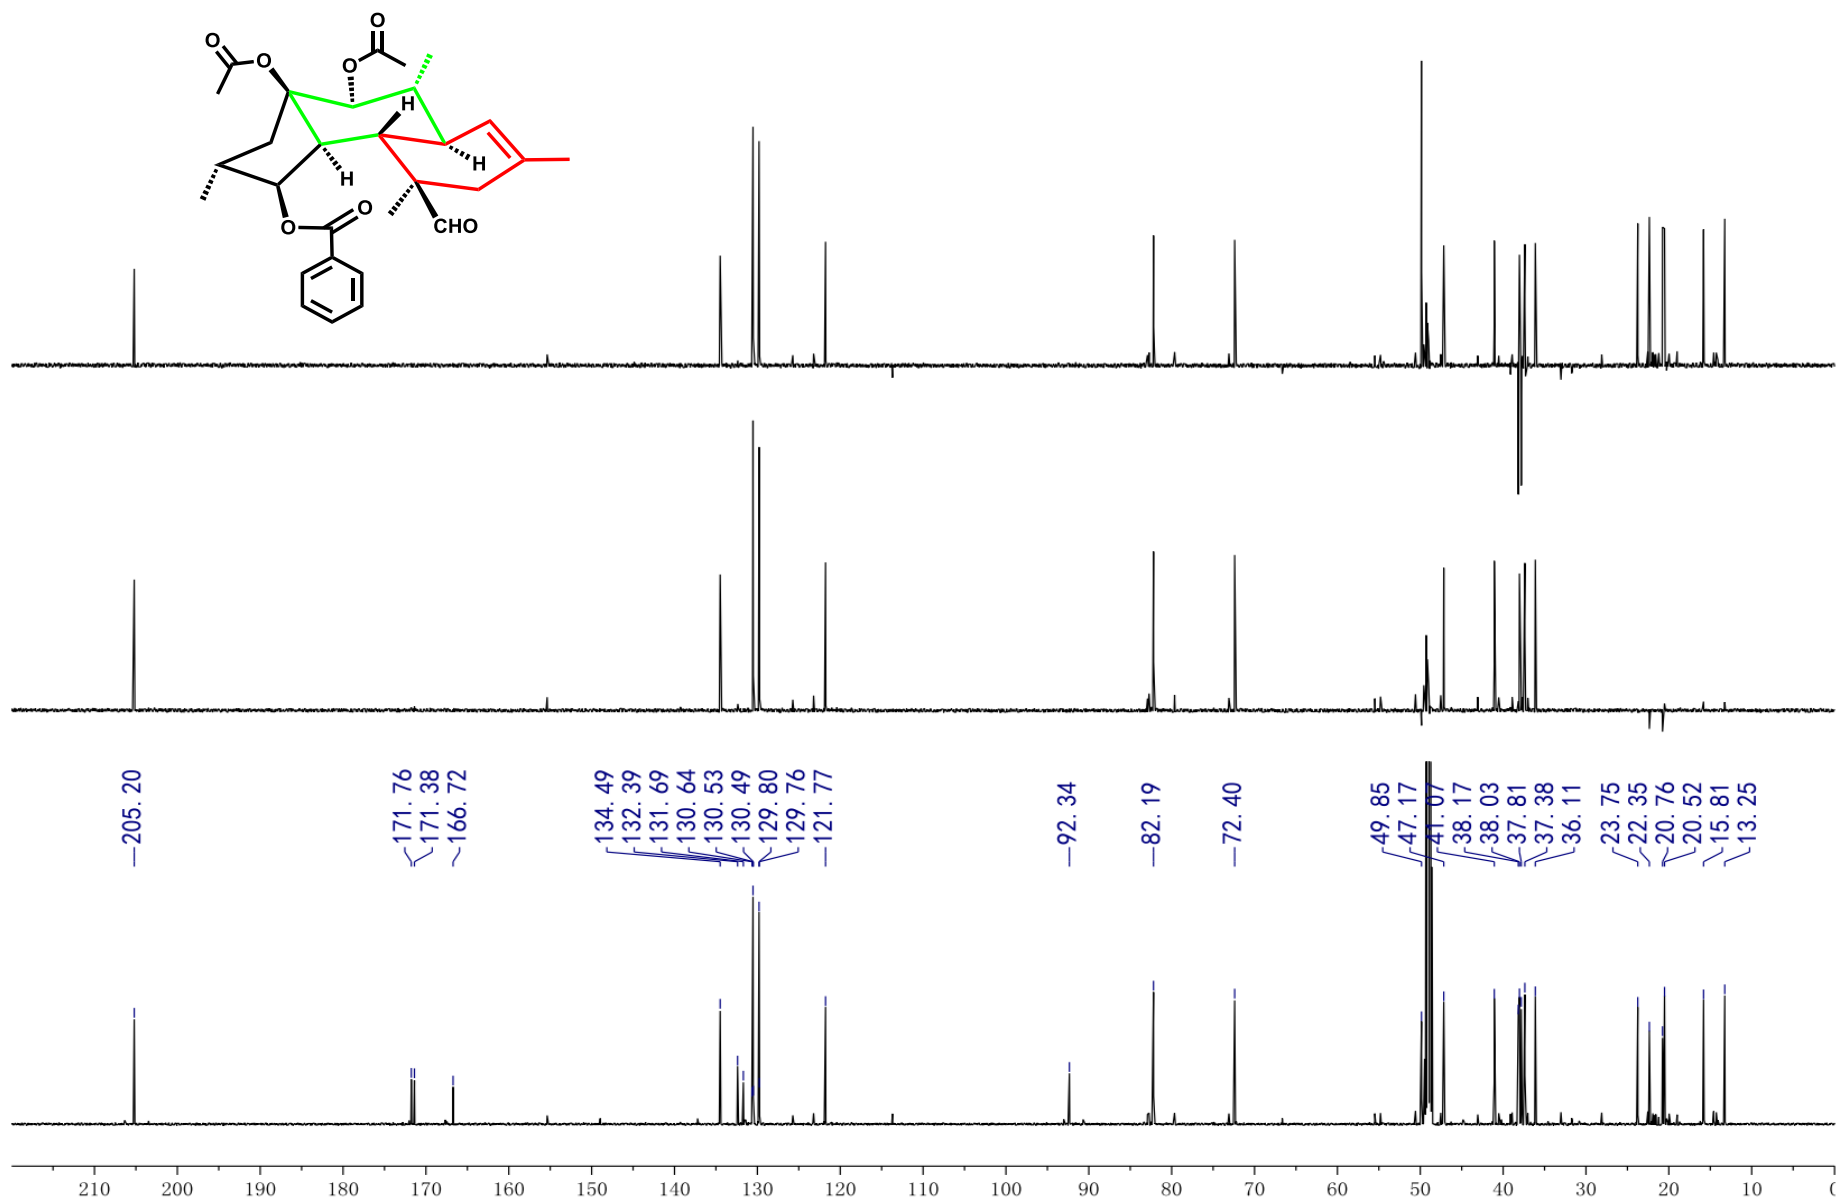

**Figure S44.**  $^{13}\text{C}$  and DEPT NMR spectra of euphopia E (2) in methanol- $\text{d}_4$  (150 MHz)

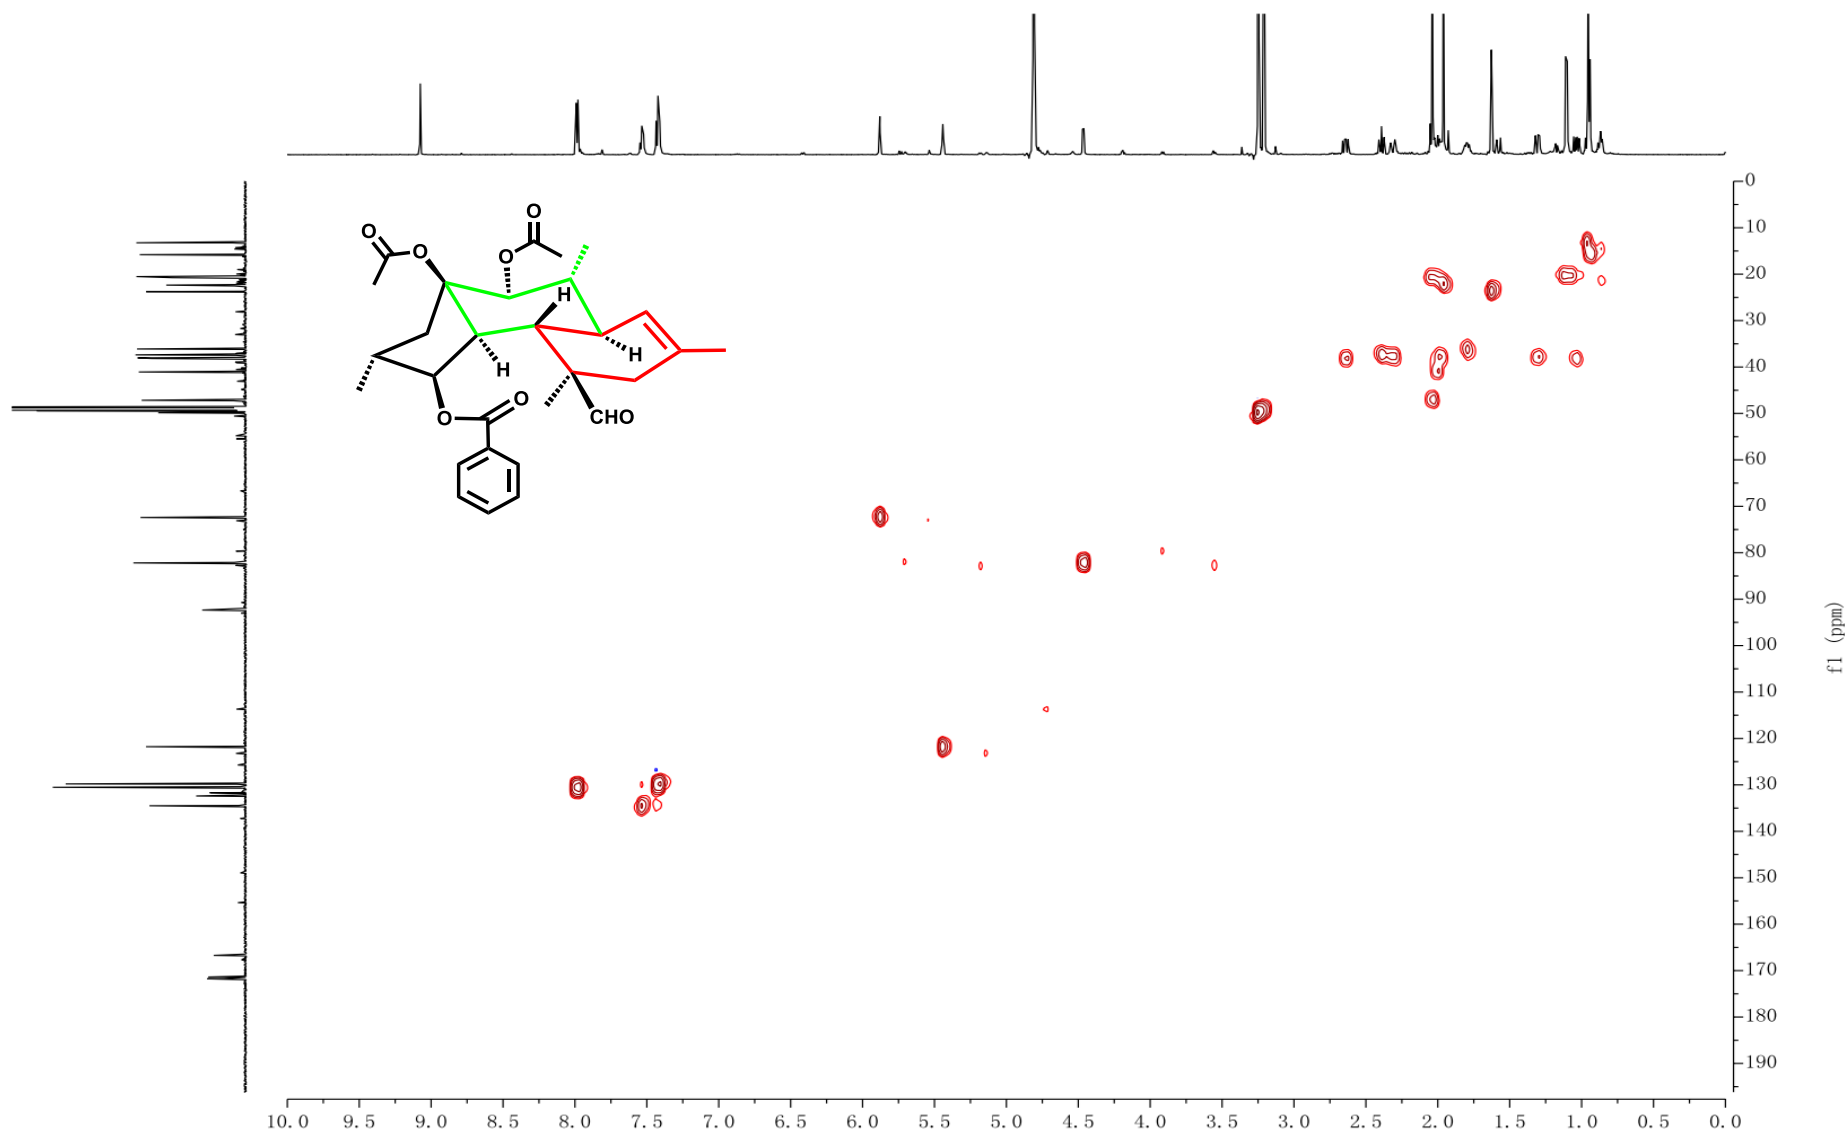

Figure S45. HSQC spectrum of euphoria E (2) in methanol-d<sub>4</sub>

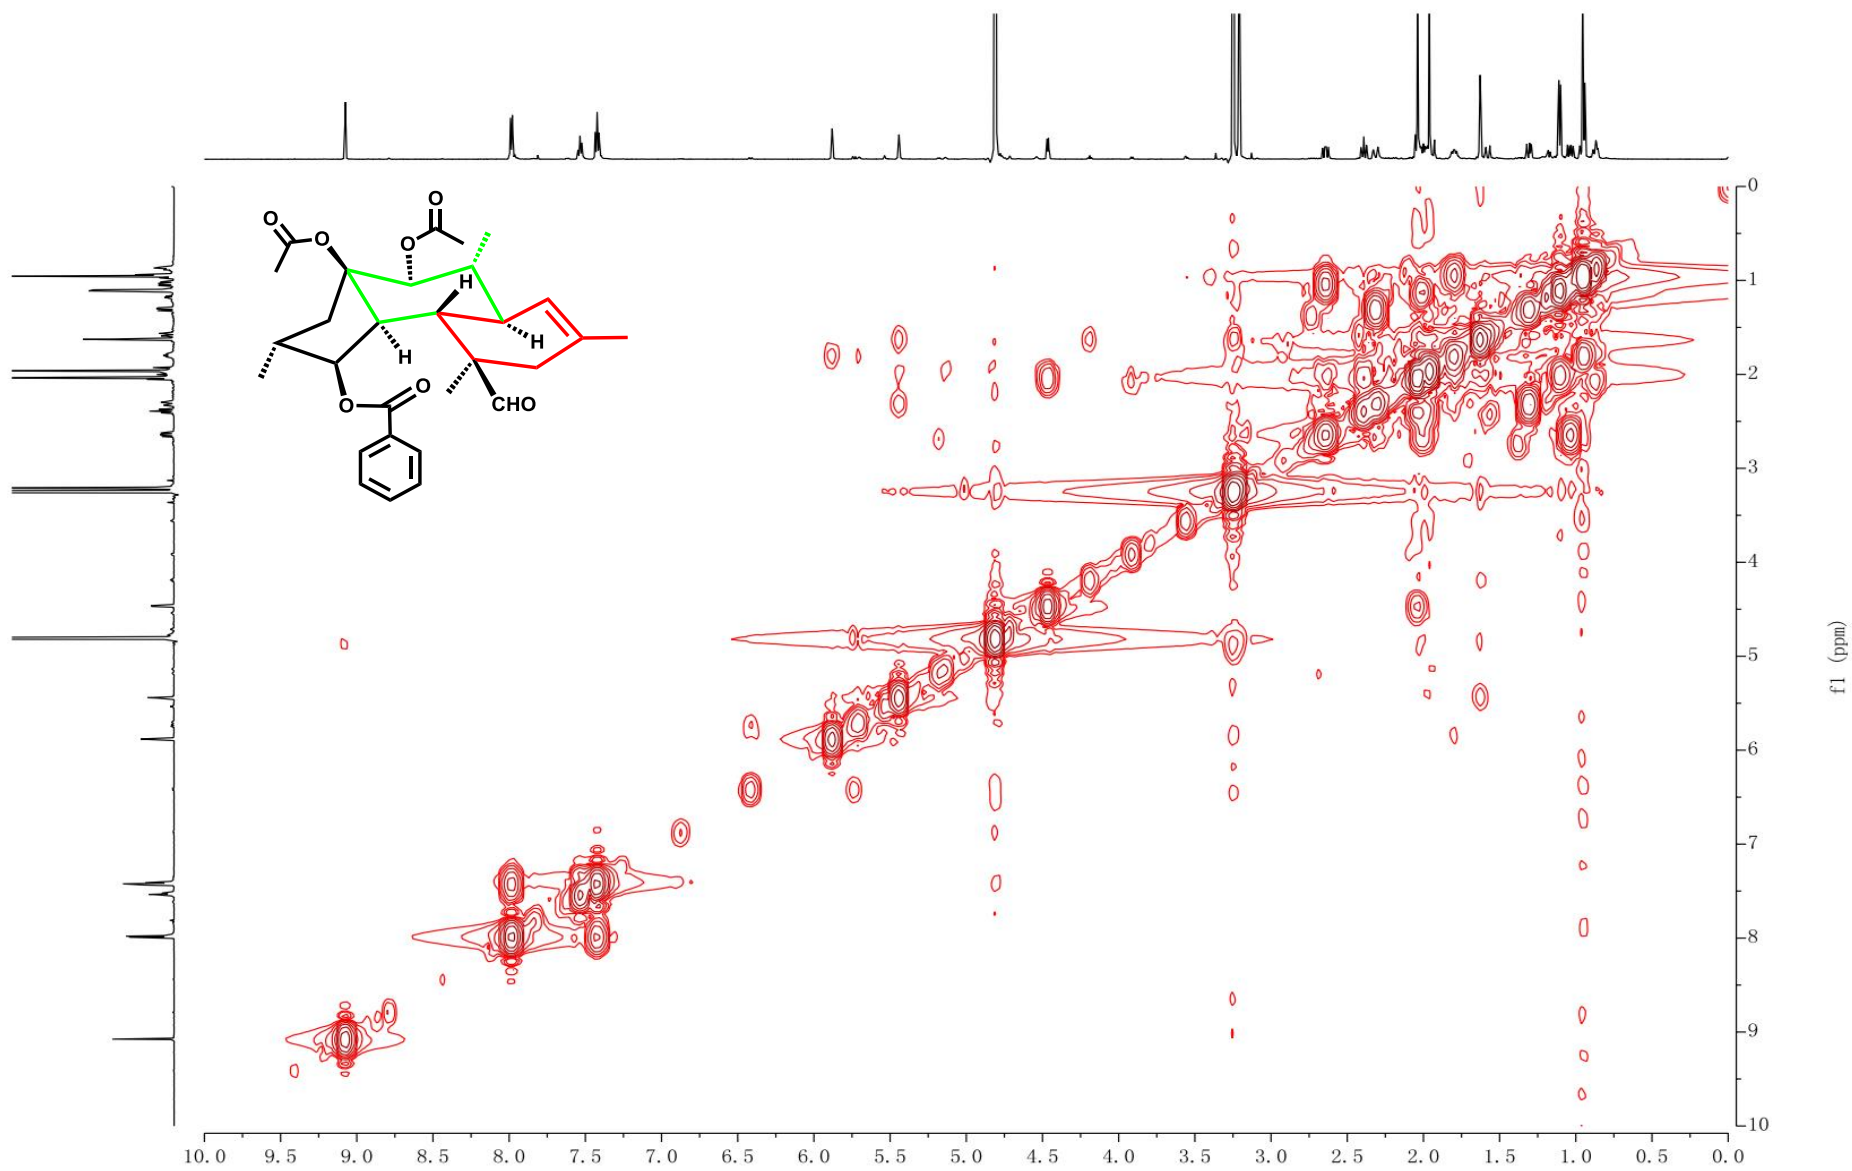

Figure S46.  $^1\text{H}$ - $^1\text{H}$  COSY NMR spectrum of euphoria E (2) in methanol- $d_4$

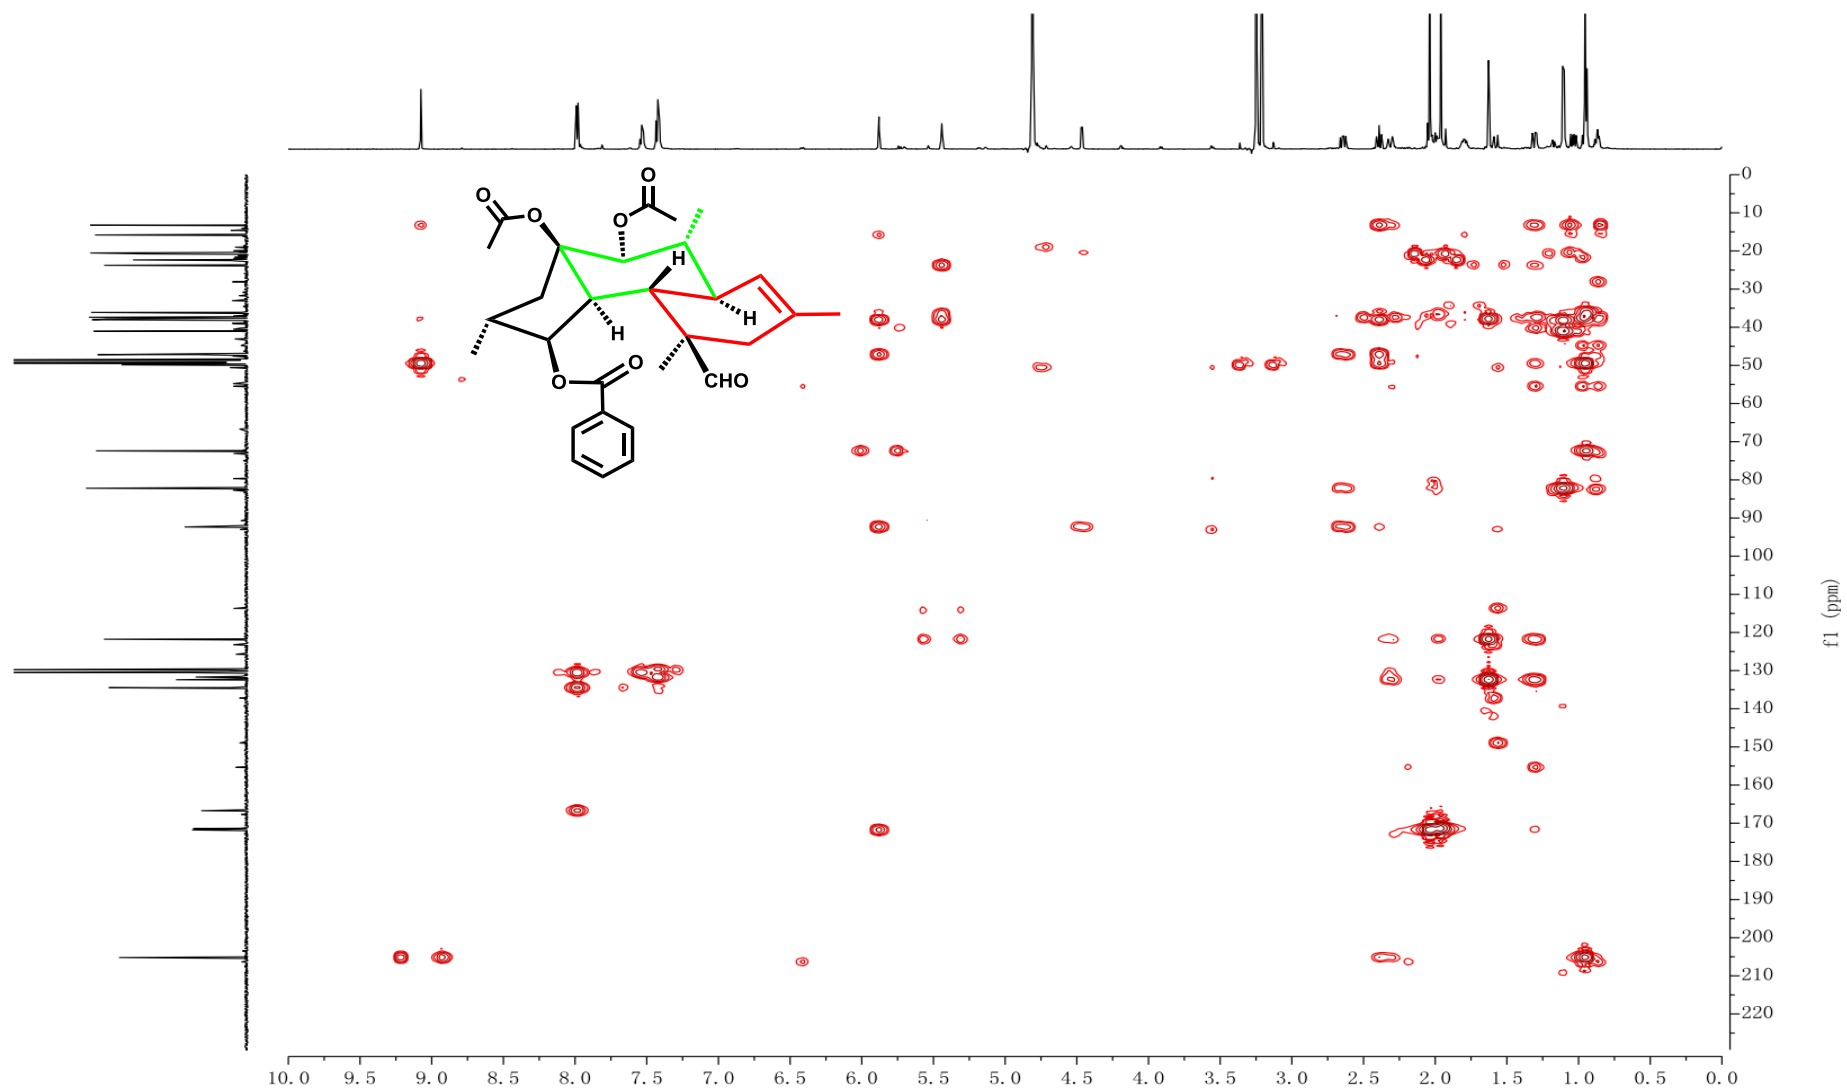

Figure S47. HMBC spectrum of euphoria E (2) in methanol-d<sub>4</sub>

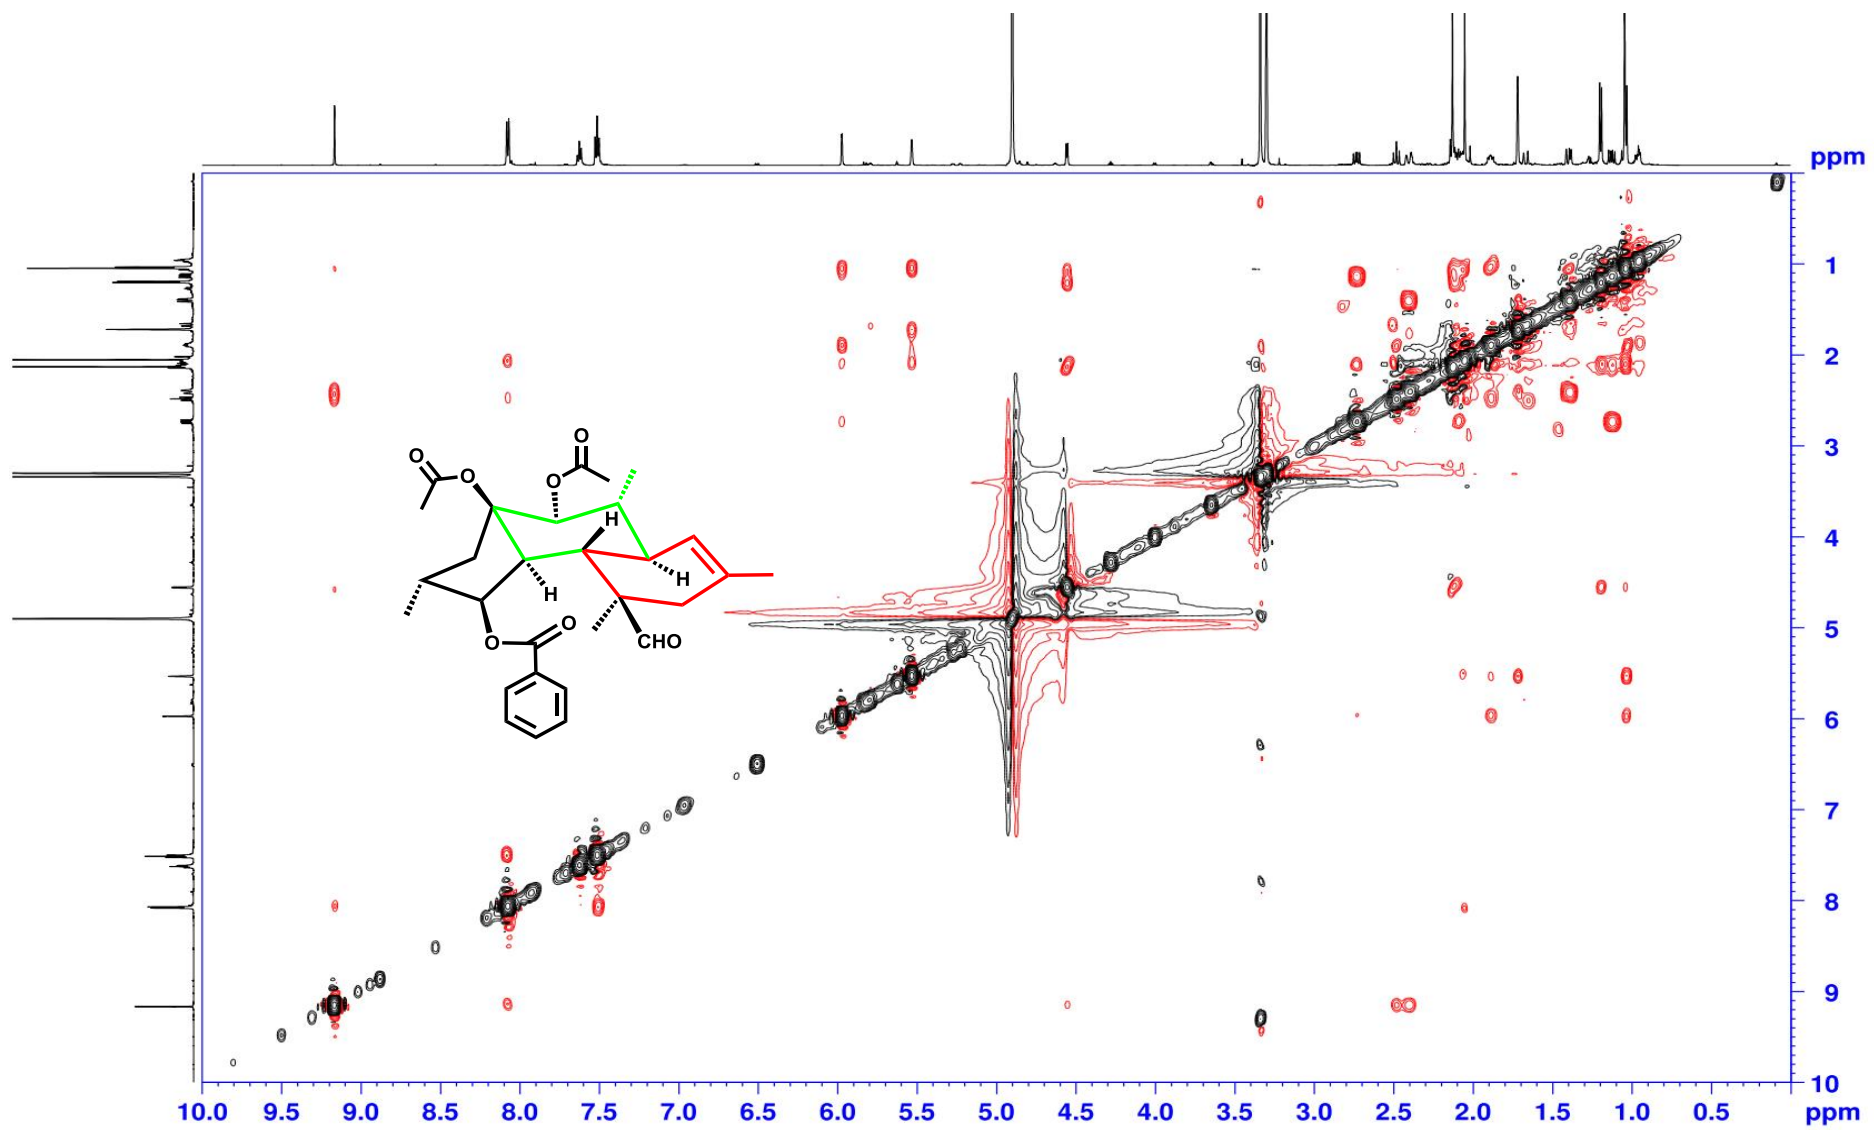

Figure S48. ROESY spectrum of euphopia E (2) in methanol-d<sub>4</sub>



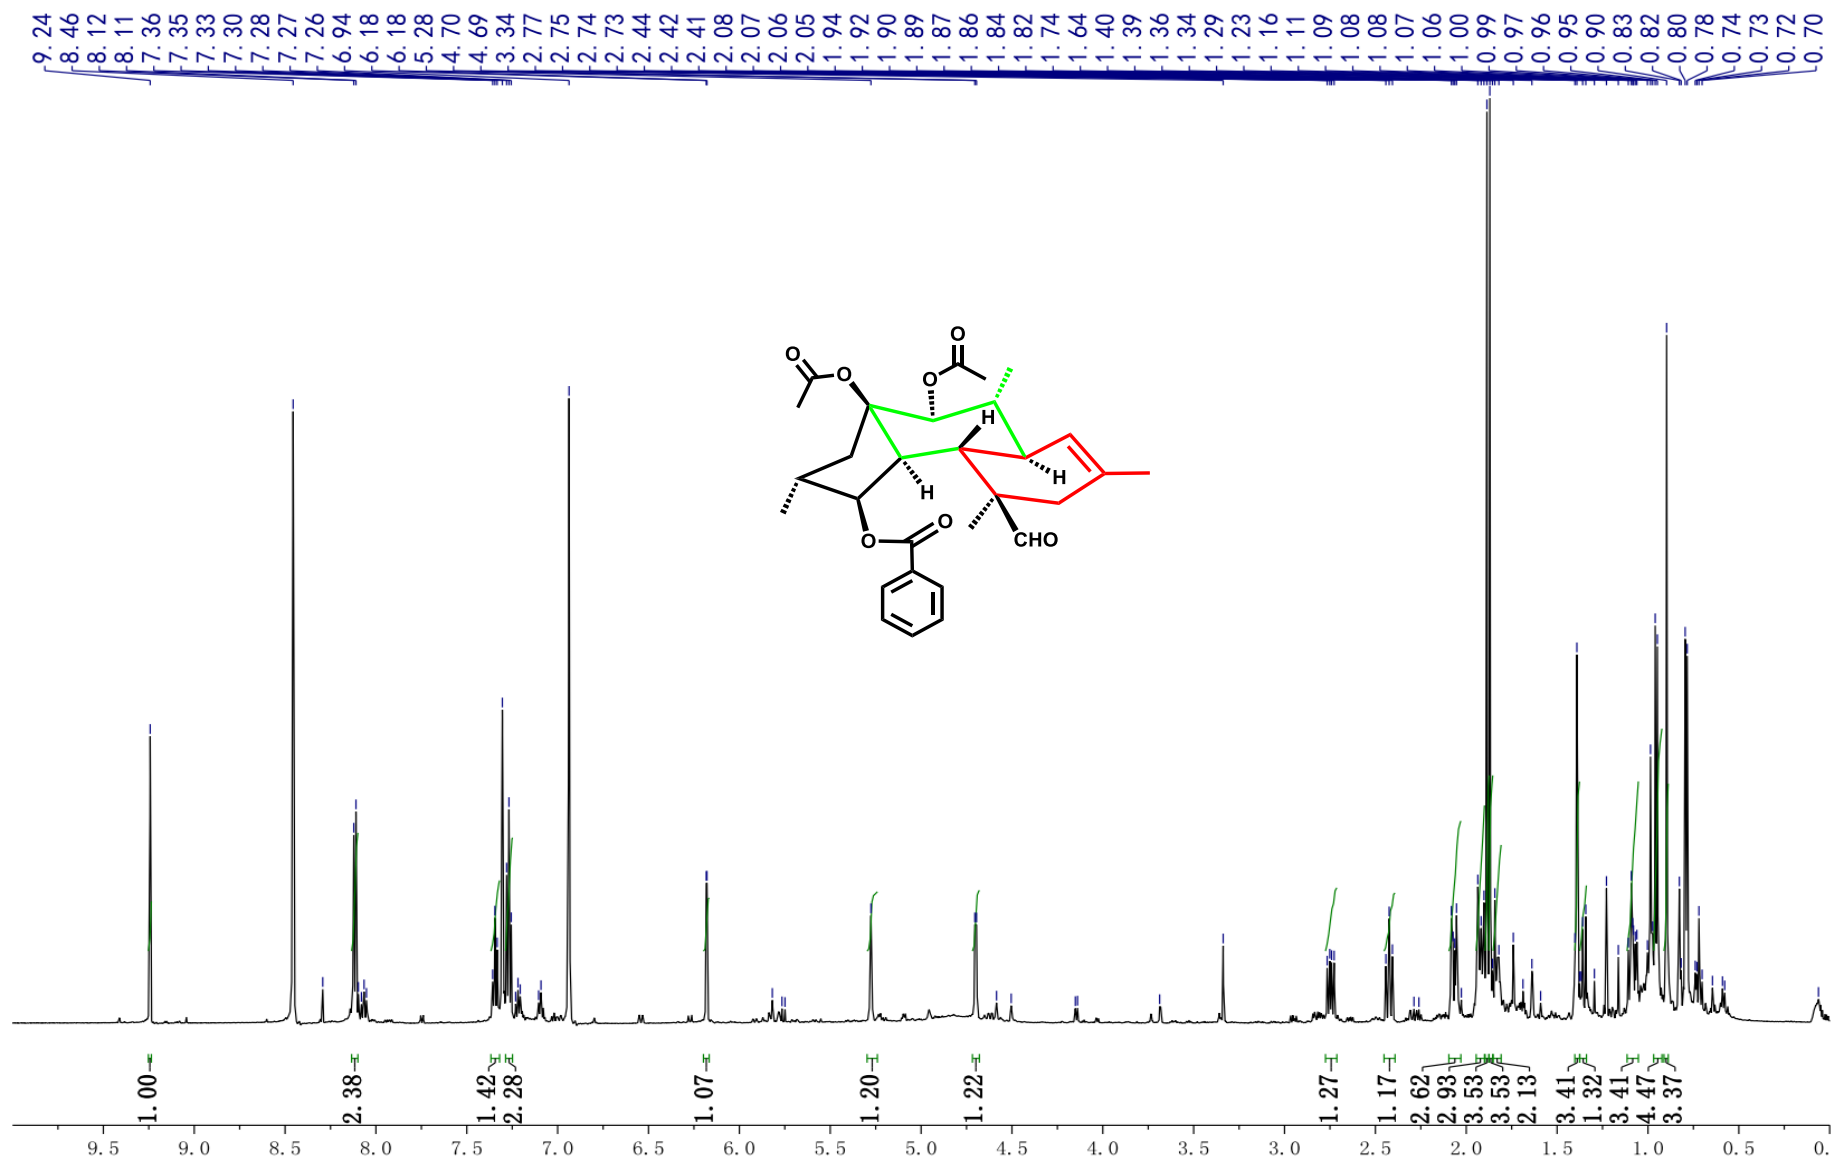

Figure S49. <sup>1</sup>H NMR spectrum of euphoria E (2) in pyridine-d<sub>5</sub> (600 MHz)

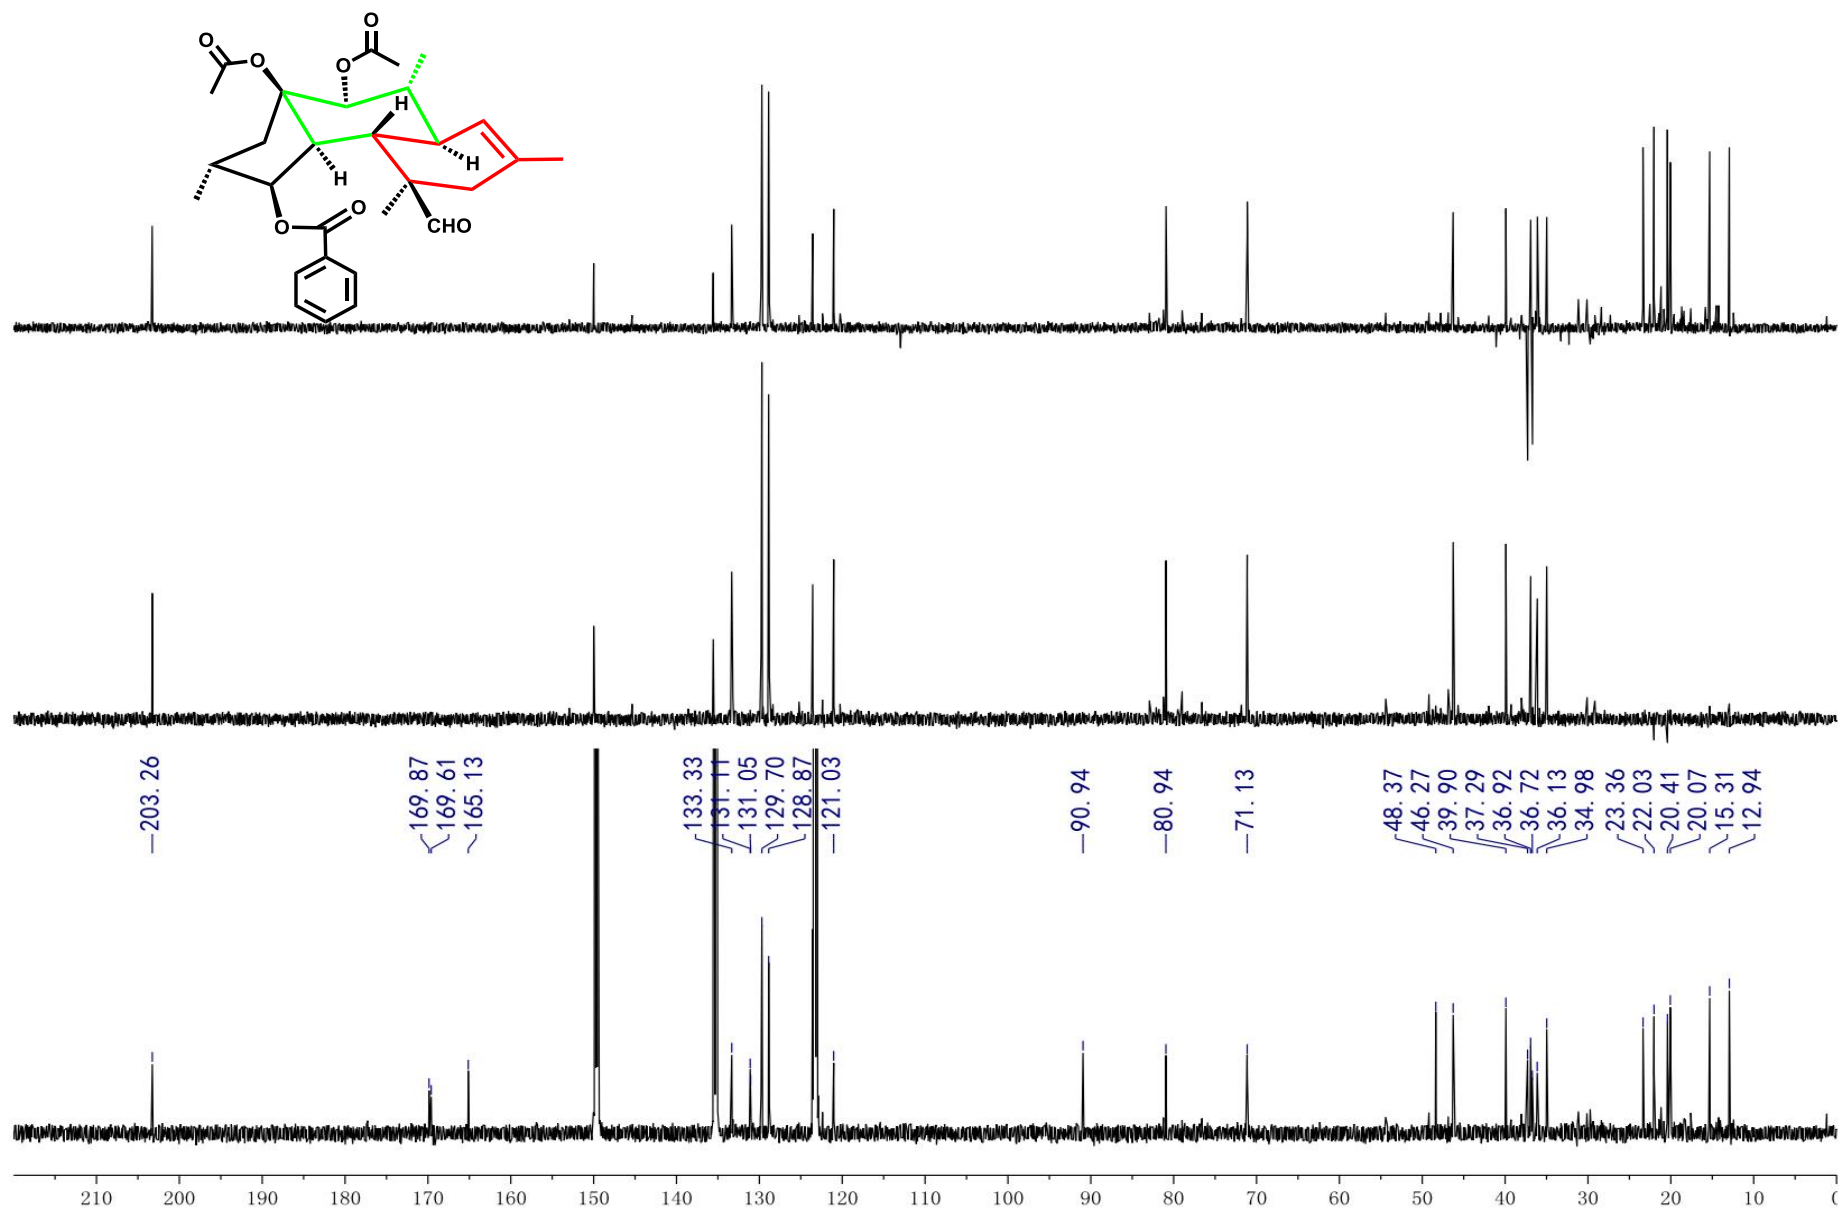

Figure S50. <sup>13</sup>C and DEPT NMR spectra of euphoria E (2) in pyridine-d<sub>5</sub> (150 MHz)

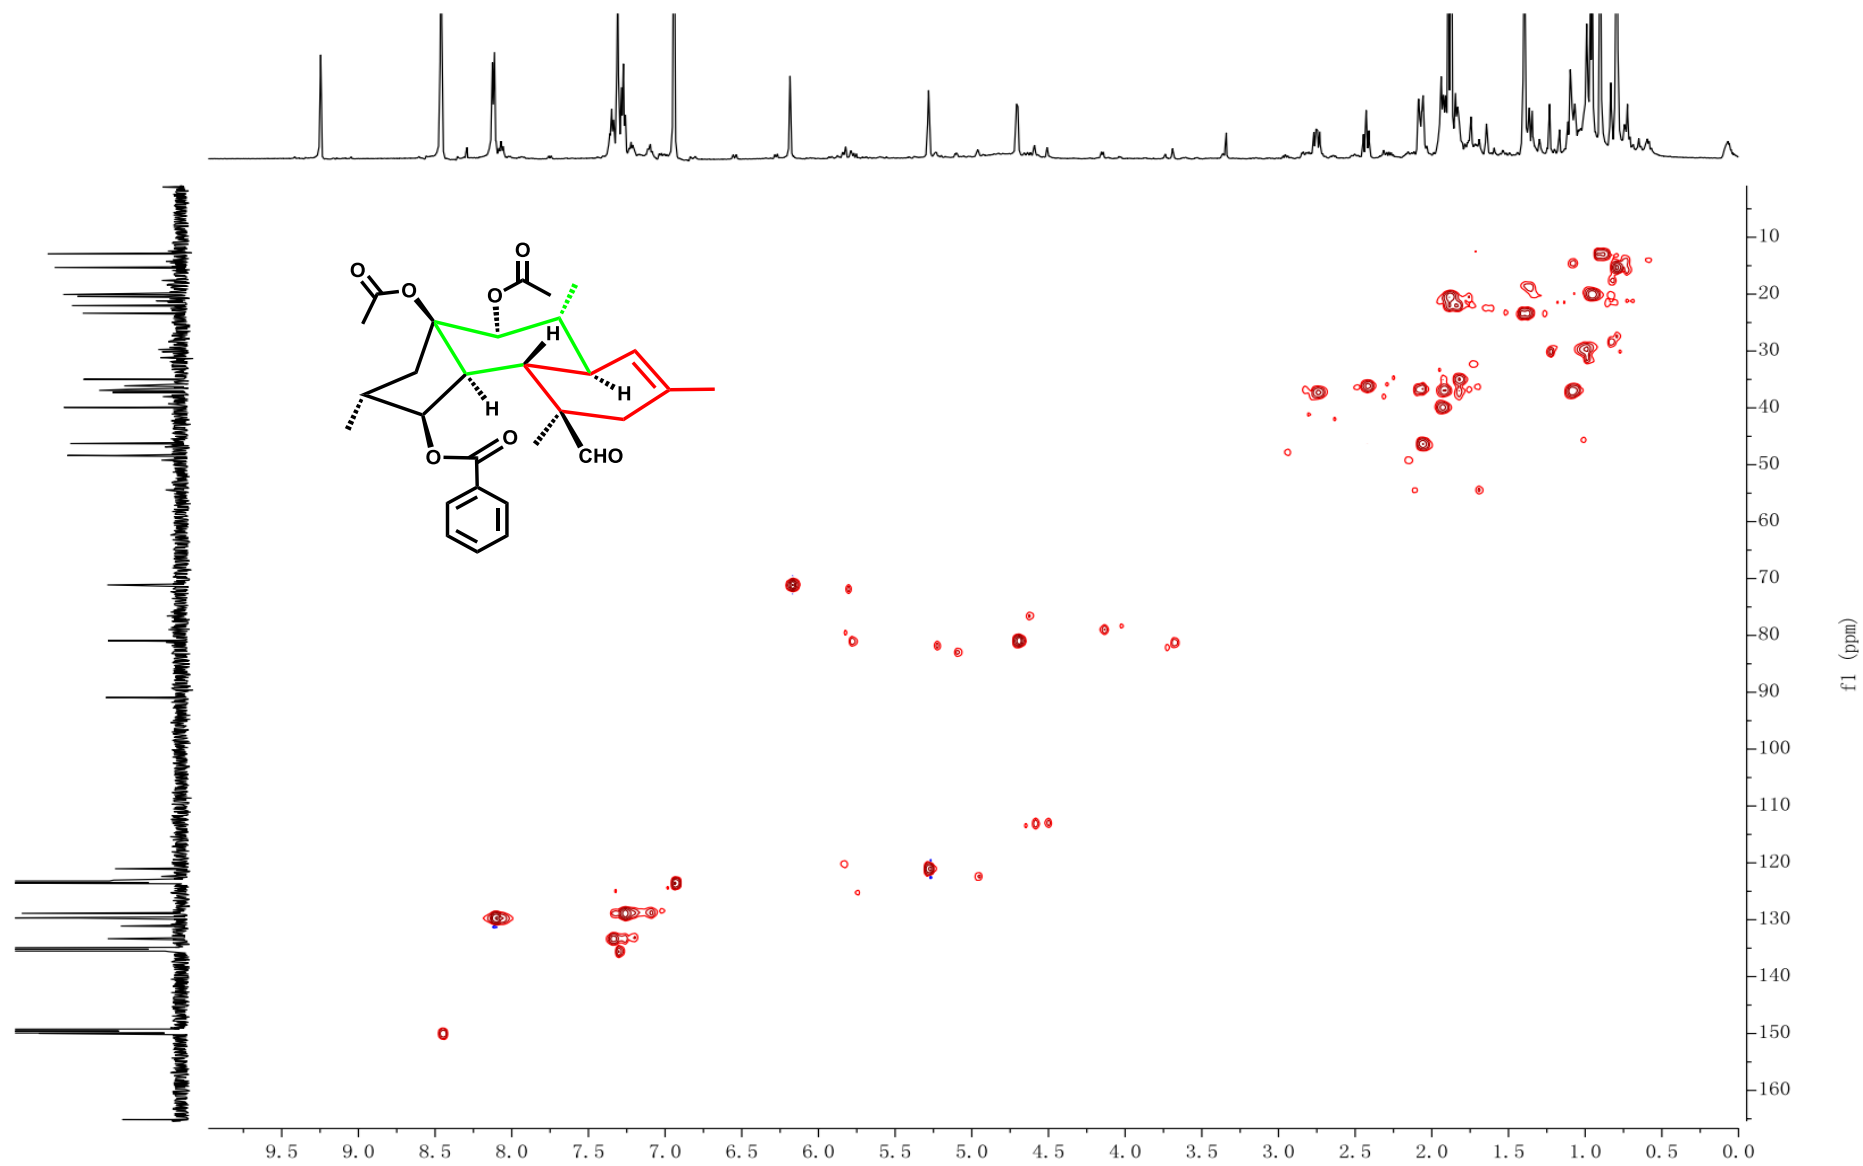

Figure S51. HSQC spectrum of euphopia E (2) in pyridine-d<sub>5</sub>

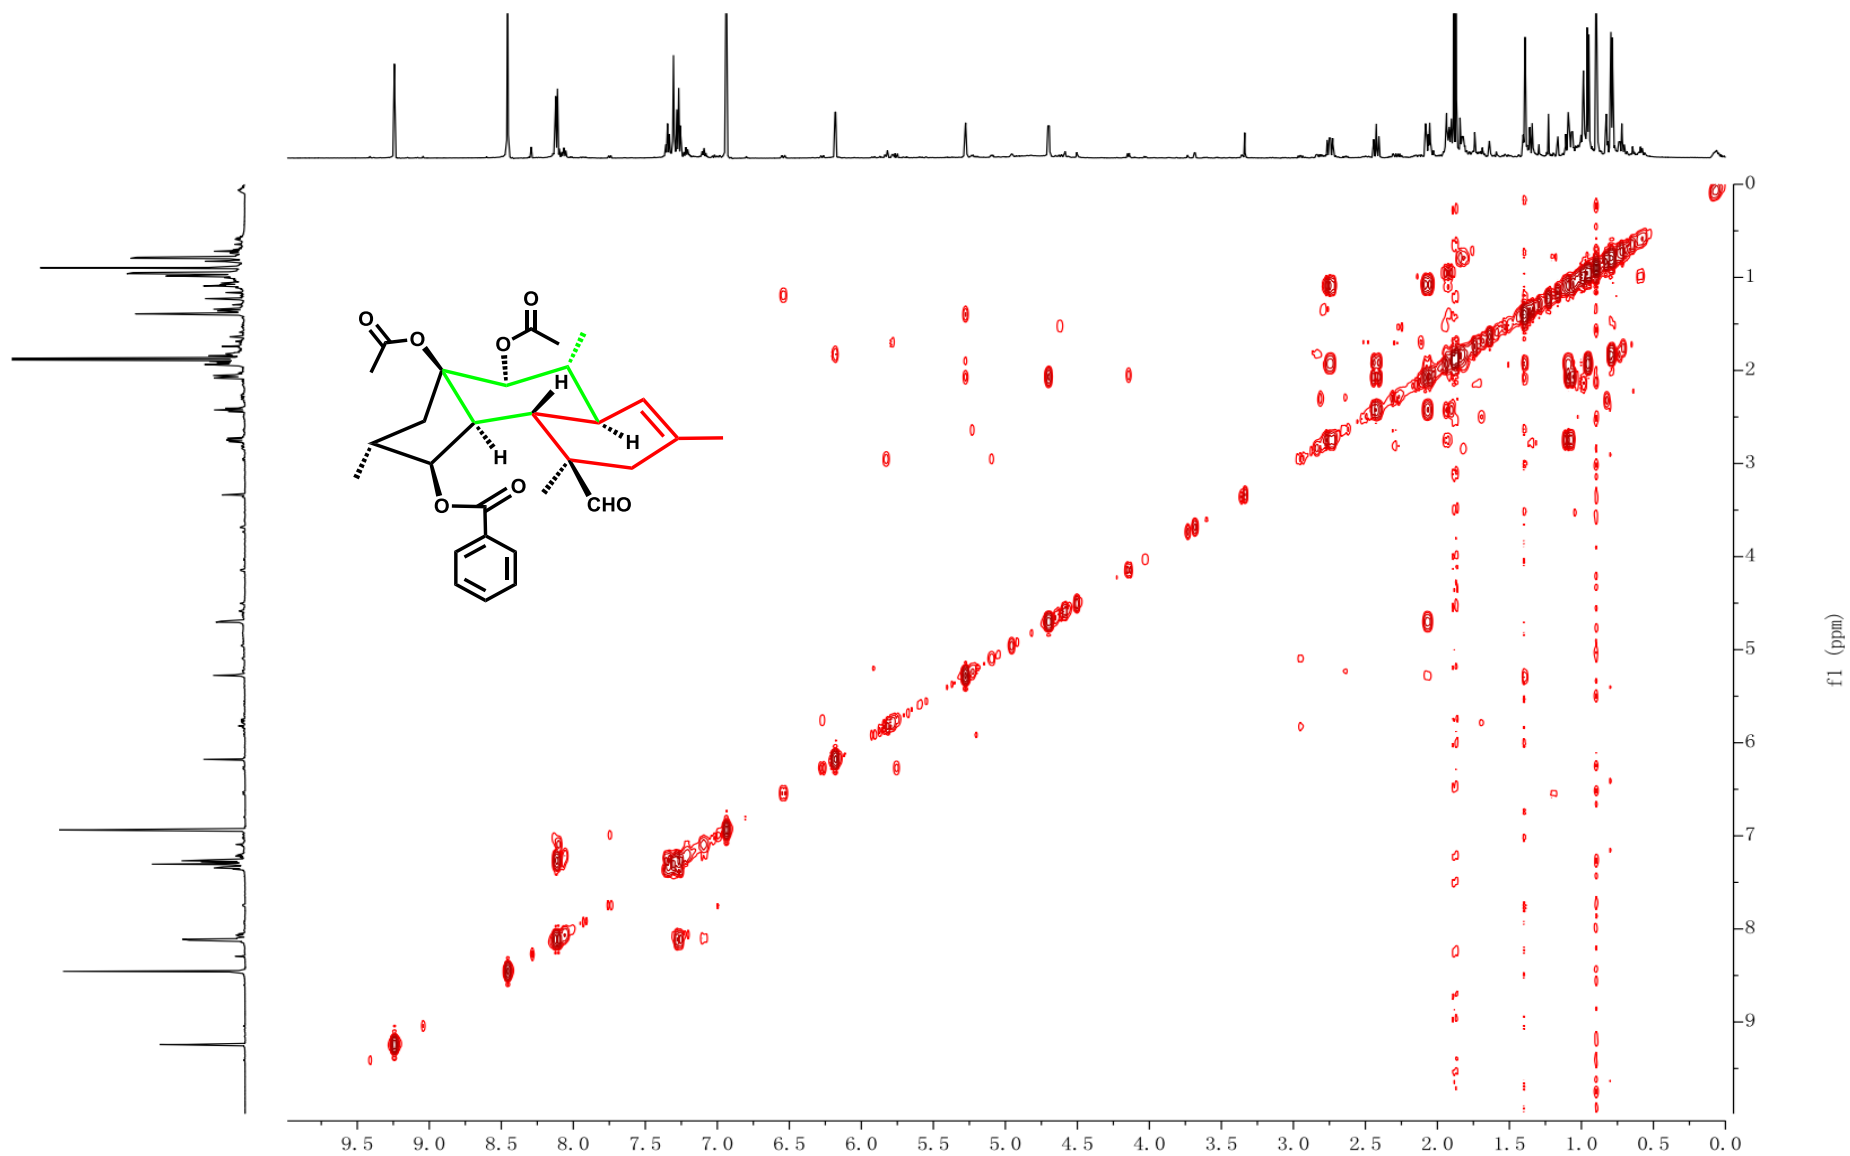

Figure S52.  $^1\text{H}$ - $^1\text{H}$  COSY NMR spectrum of euphoria E (2) in  $\text{pyridine-d}_5$

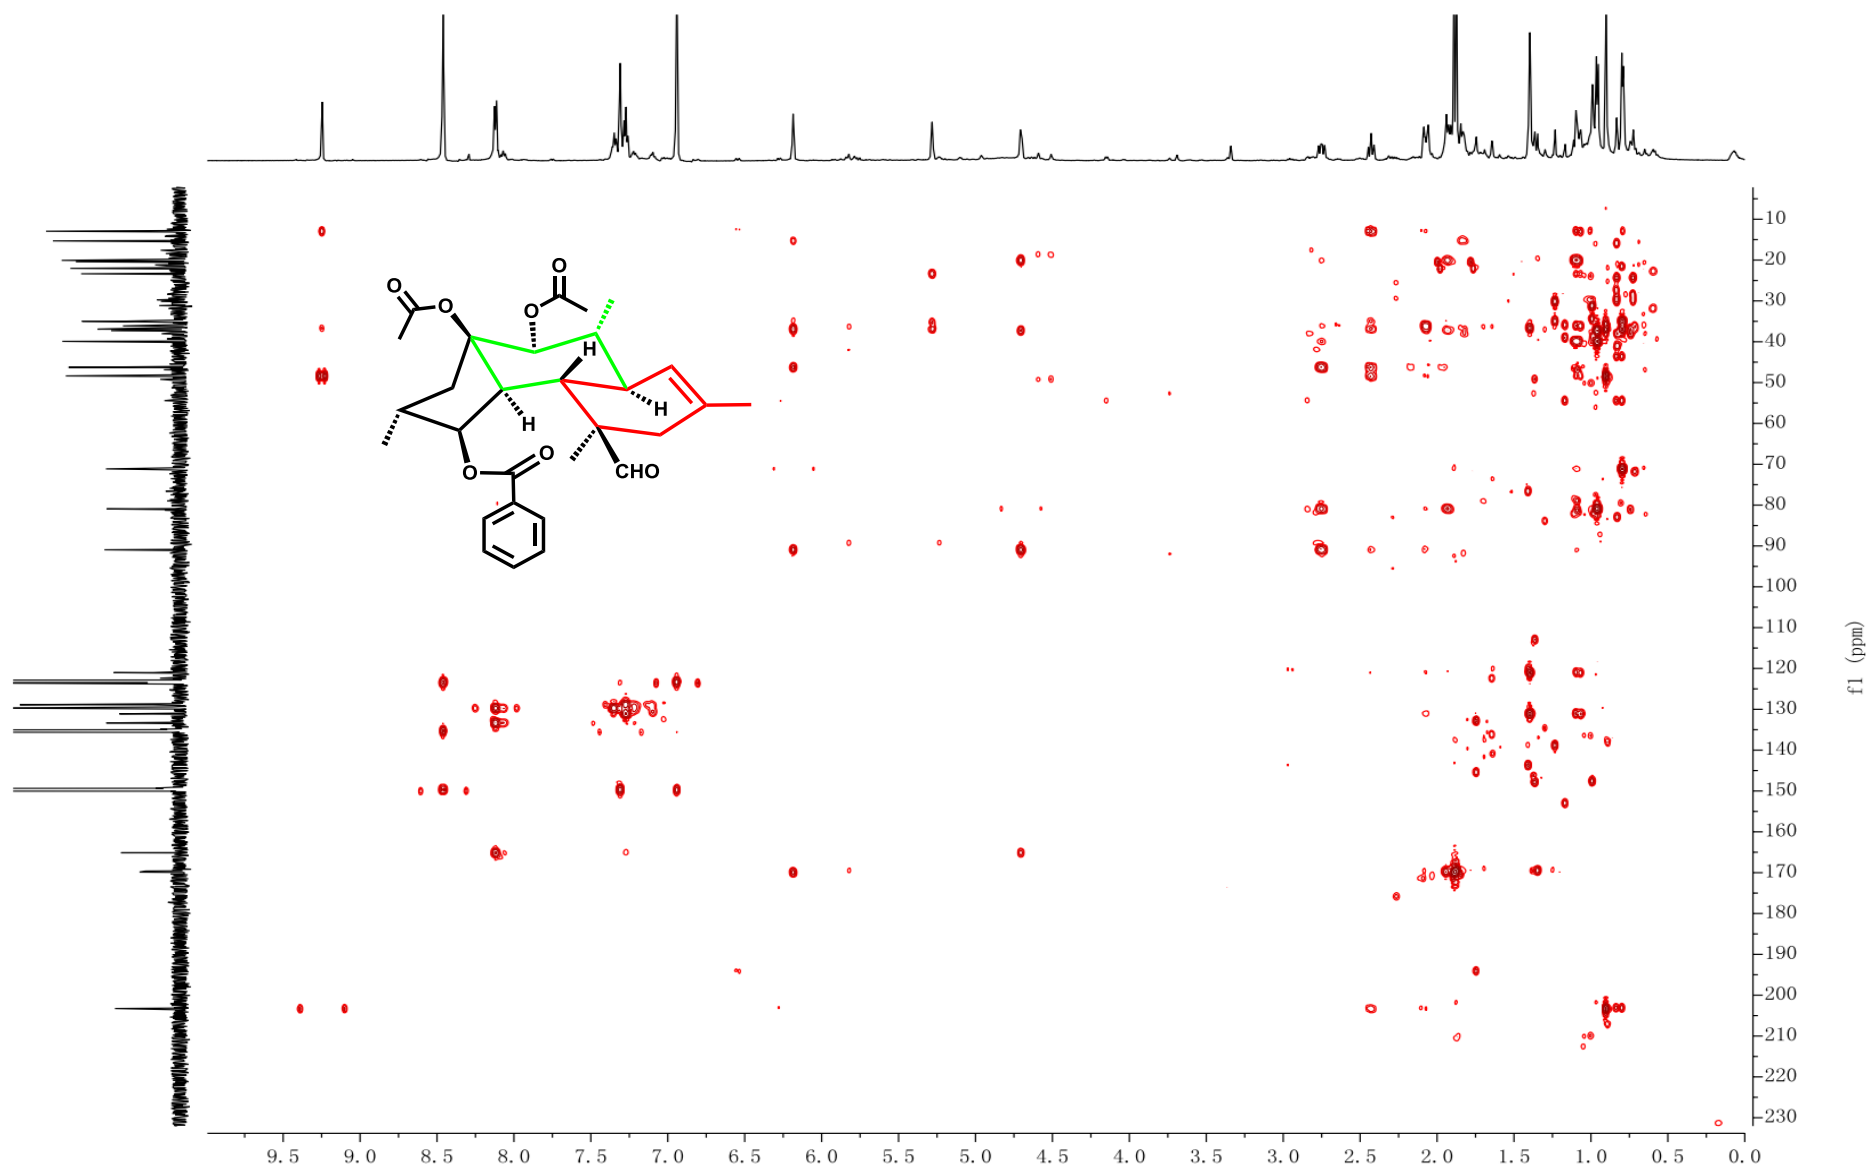

Figure S53. HMBC spectrum of euphoria E (2) in pyridine-d<sub>5</sub>

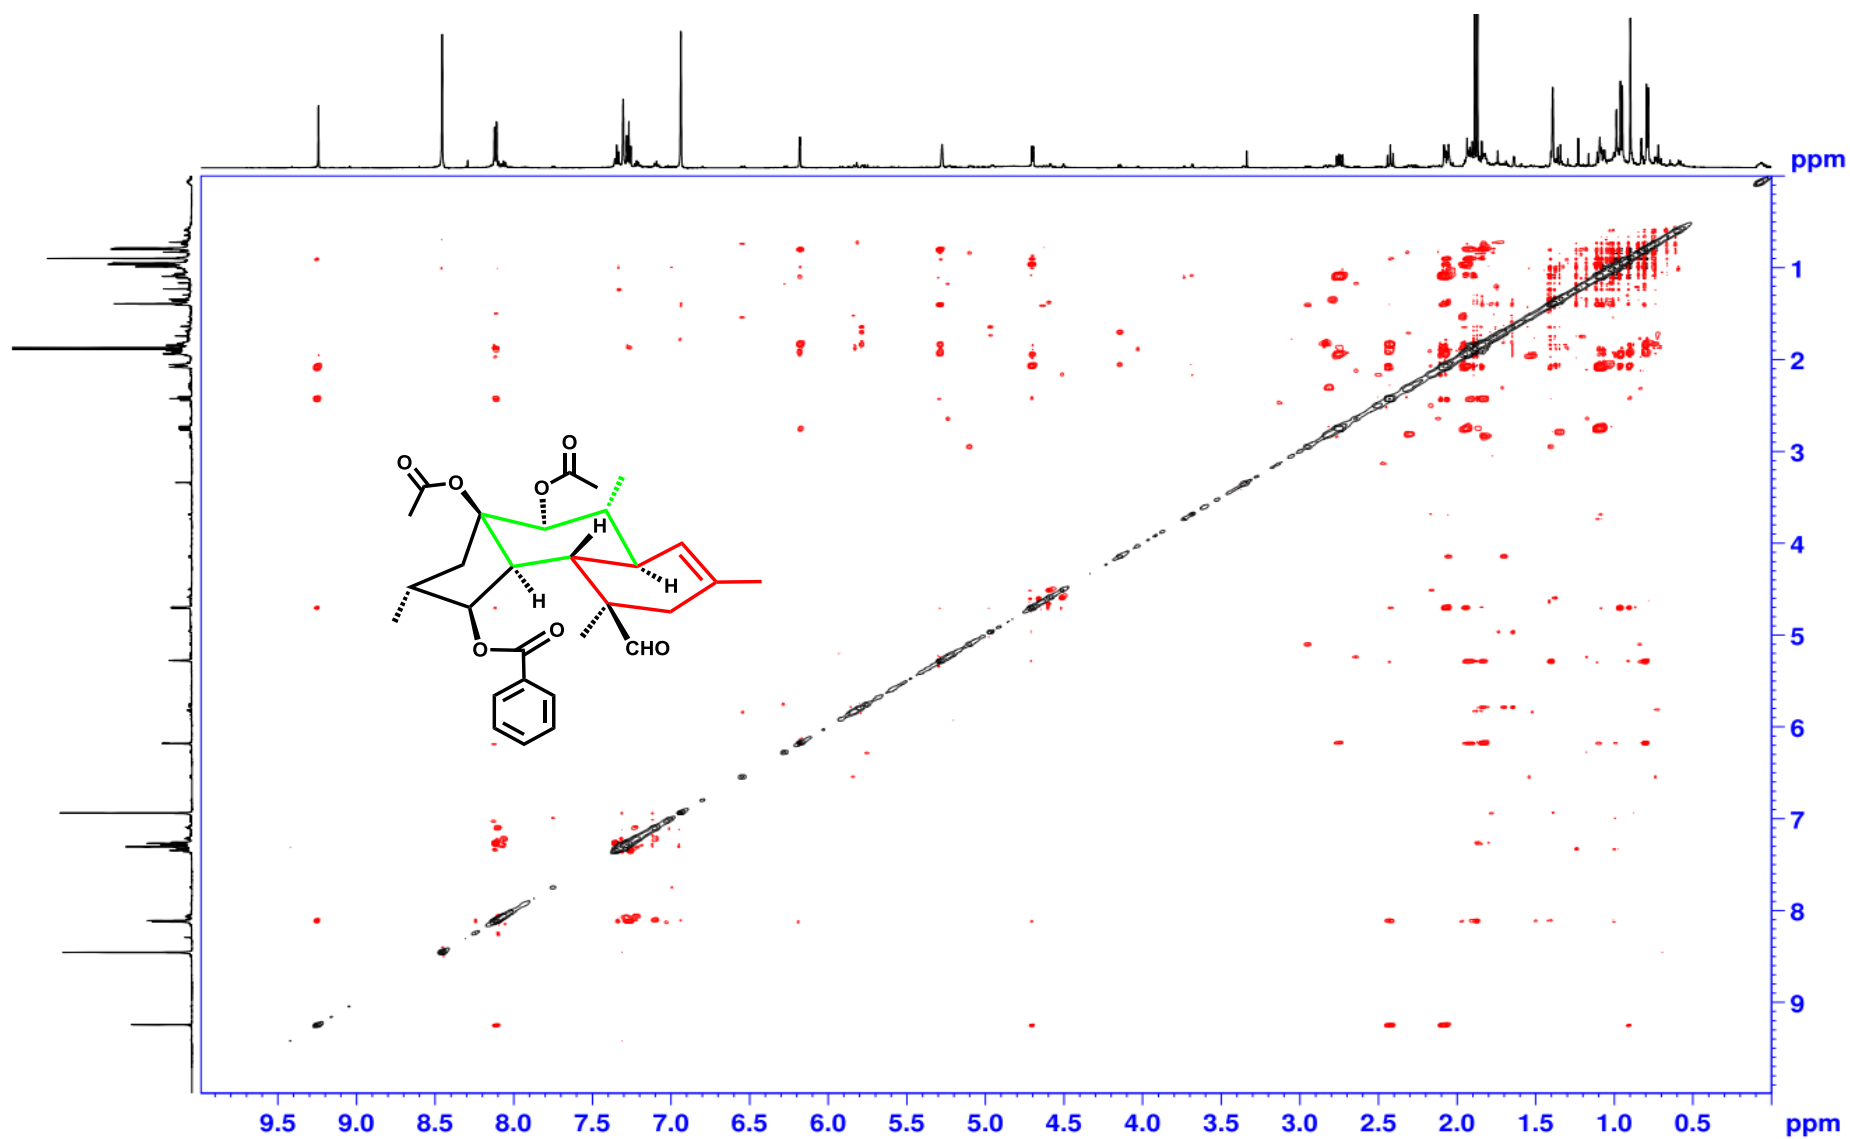

Figure S54. ROESY spectrum of euphoria E (2) in pyridine-d<sub>5</sub>

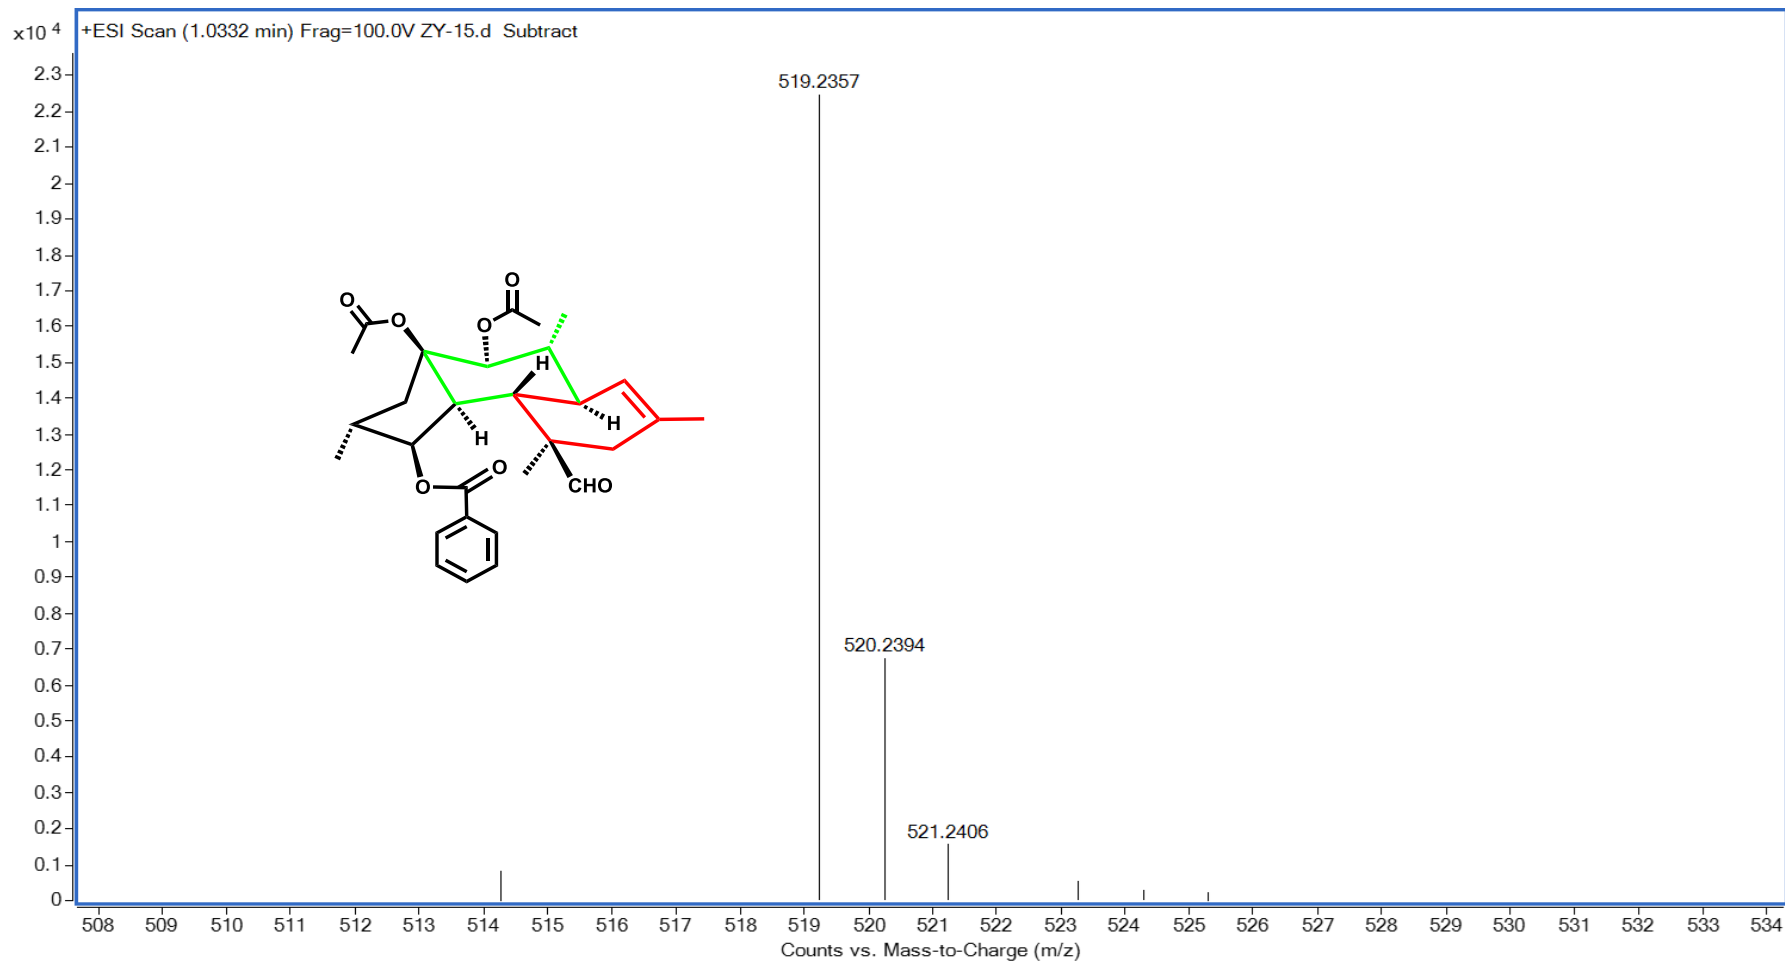

MS Formula Results: + Scan (1.0332 min) Sub (ZY-15.d)

| m/z      | Ion                 | Formula                                          | Abundance |
|----------|---------------------|--------------------------------------------------|-----------|
| 519.2357 | (M+Na) <sup>+</sup> | C <sub>29</sub> H <sub>36</sub> NaO <sub>7</sub> | 22485.9   |

  

| Best                                | Formula (M)                                    | Ion Formula                                      | Score | Cross Score | Calc m/z | Diff (ppm) | Mass Match | Abund Match | Spacing Match |
|-------------------------------------|------------------------------------------------|--------------------------------------------------|-------|-------------|----------|------------|------------|-------------|---------------|
| <input checked="" type="checkbox"/> | C <sub>29</sub> H <sub>36</sub> O <sub>7</sub> | C <sub>29</sub> H <sub>36</sub> NaO <sub>7</sub> | 98.4  |             | 519.2353 | -0.74      | 99.44      | 96.59       | 98.46         |

Figure S55. HRESIMS spectrum of euphopia E (2)

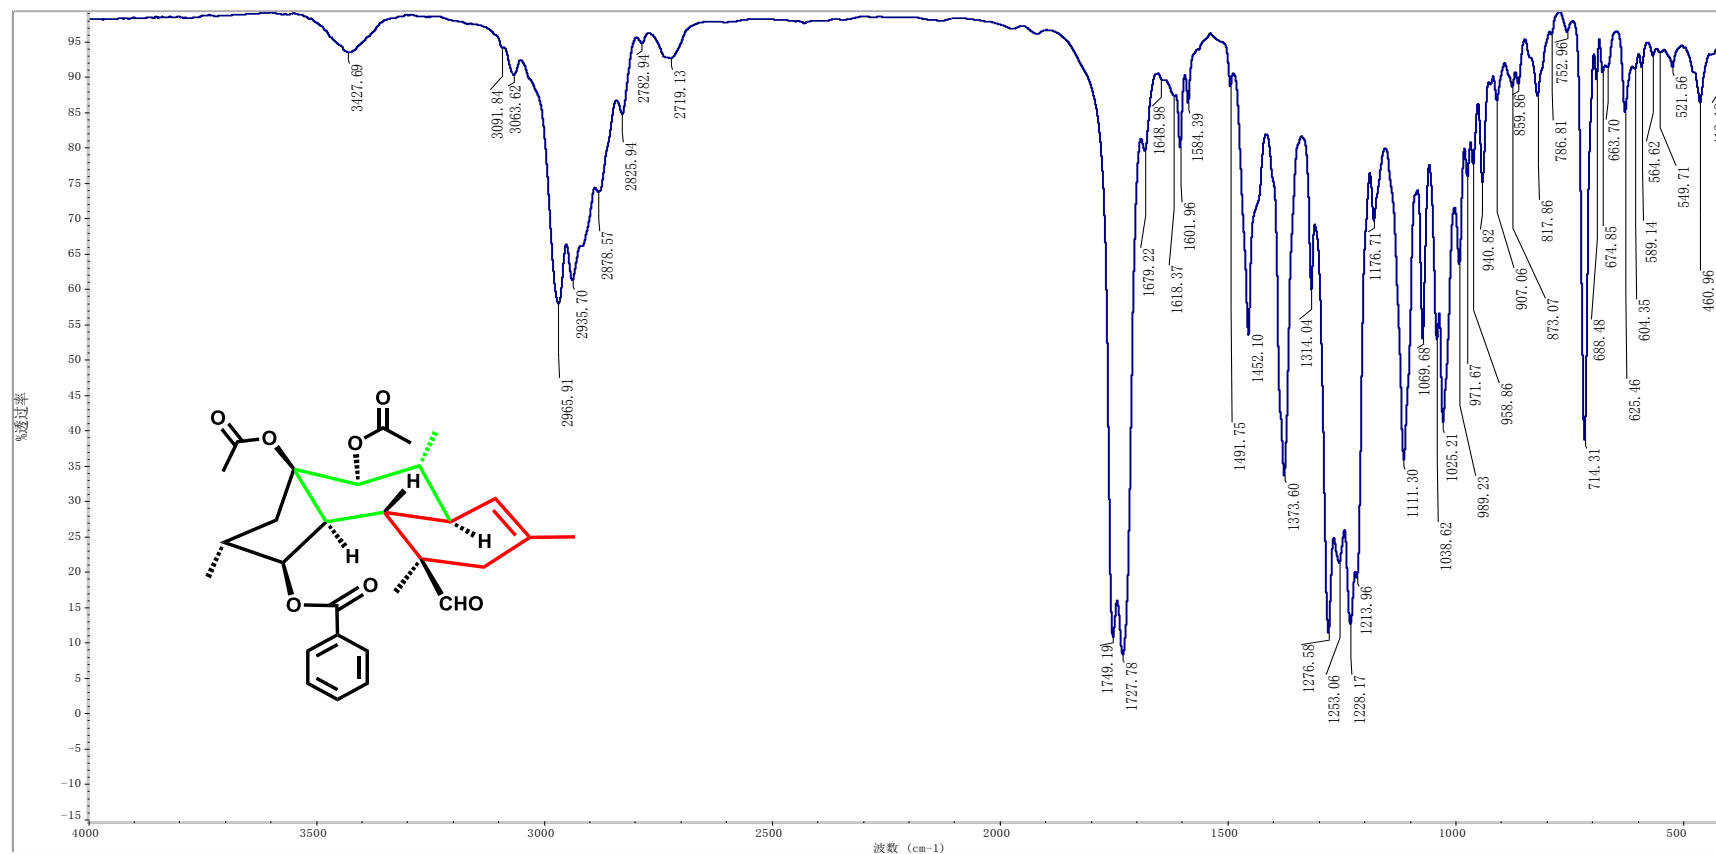

Sample Name: ZY-15  
 KBr压片  
 采集时间: 星期二 2月 02 13:51:53 2021 (GMT+08:00)  
 仪器型号: NICOLET iS10  
 Software version: OMNIC 9.8.372

样品扫描次数: 16  
 背景扫描次数: 16  
 分辨率: 4.000  
 采样增益: 1.0  
 动镜速度: 0.4747  
 光阑: 80.00

Figure S56. IR spectrum of euphoria E (2)



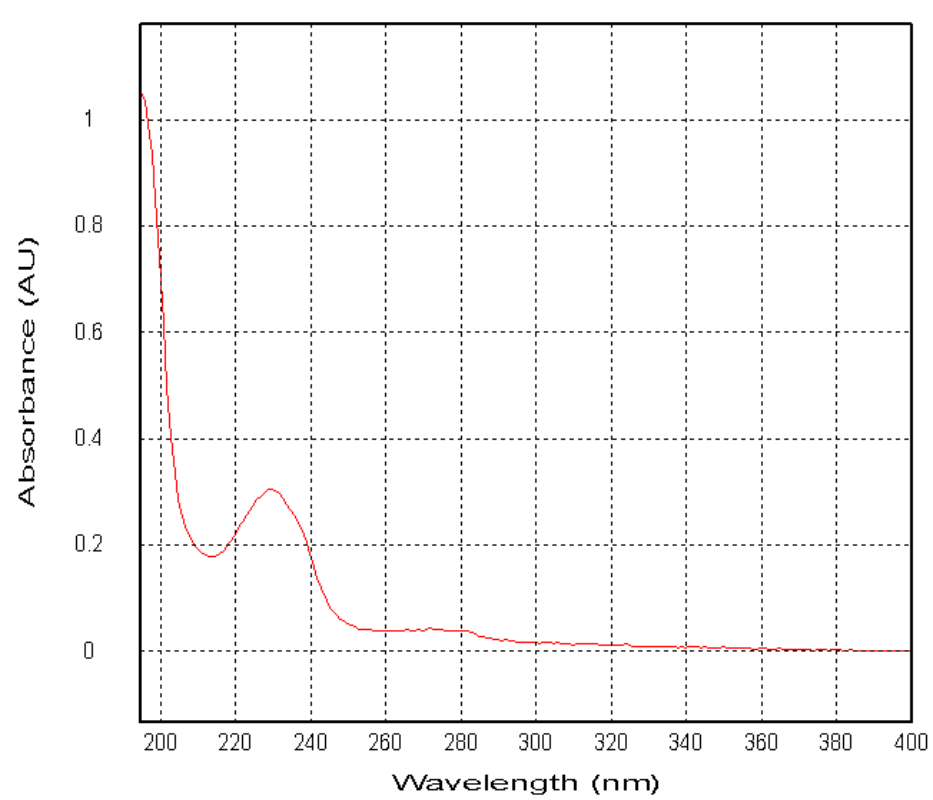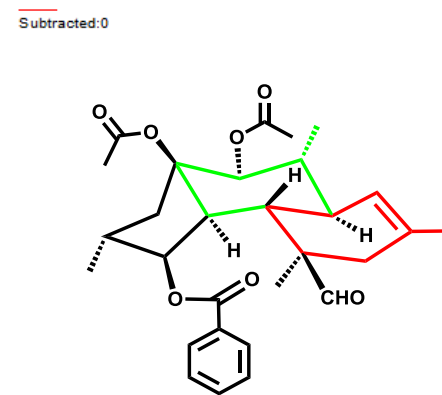

Figure S57. UV spectrum of euphopia E (2)

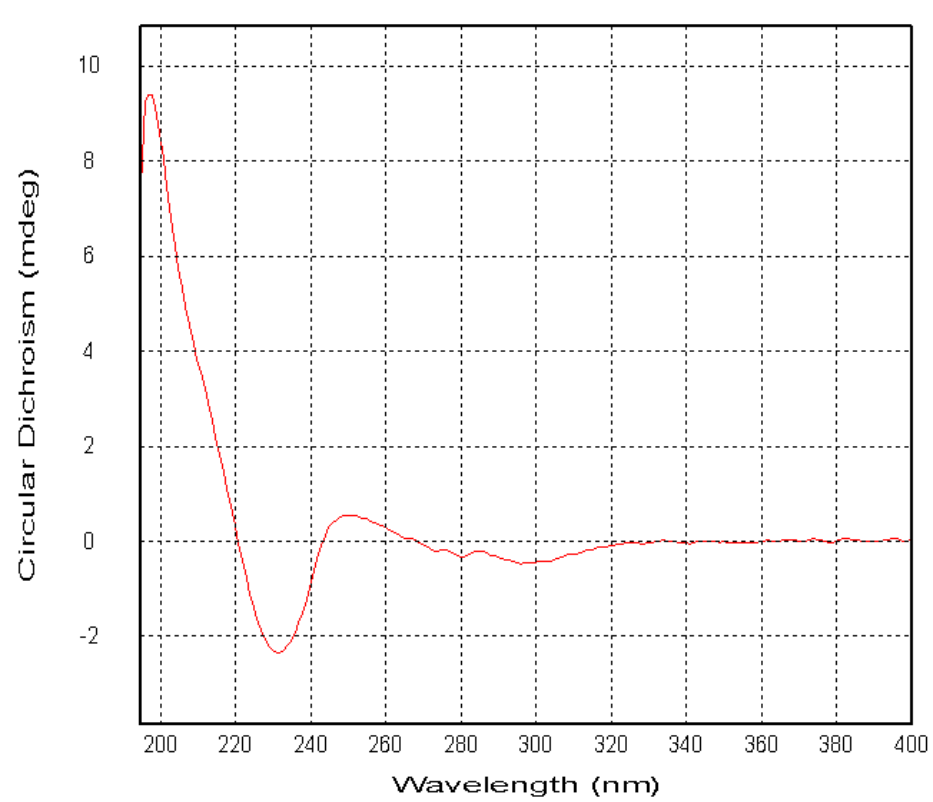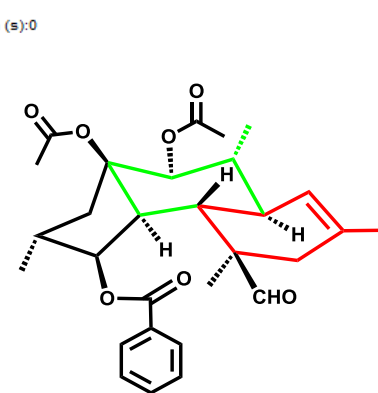

Figure S58. CD spectrum of euphoria E (2)

## Rudolph Research Analytical

This sample was measured on an Autopol VI, Serial #91058  
Manufactured by Rudolph Research Analytical, Hackettstown, NJ, USA.

Measurement Date : Tuesday, 02-FEB-2021

Set Temperature : OFF

Time Delay : Disabled

Delay between Measurement : Disabled

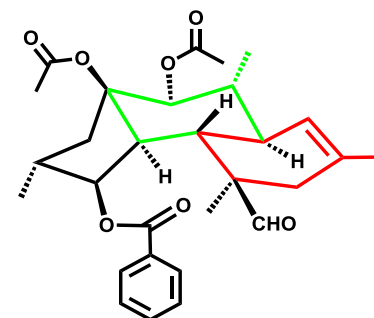

| <u>n</u> | <u>Average</u> | <u>Std.Dev.</u> | <u>% RSD</u> | <u>Maximum</u> | <u>Minimum</u> |
|----------|----------------|-----------------|--------------|----------------|----------------|
| 5        | -13.56         | 0.44            | -3.24        | -13.10         | -14.10         |

| <u>S.No</u> | <u>Sample ID</u> | <u>Time</u> | <u>Result</u> | <u>Scale</u> | <u>OR °Arc</u> | <u>WLG.nm</u> | <u>Lg.mm</u> | <u>Conc.g/100ml</u> | <u>Temp.</u> |
|-------------|------------------|-------------|---------------|--------------|----------------|---------------|--------------|---------------------|--------------|
| 1           | ZY-15            | 08:40:19 PM | -14.10        | SR           | -0.0141        | 589           | 100.00       | 0.100               | 20.7         |
| 2           | ZY-15            | 08:40:28 PM | -13.80        | SR           | -0.0138        | 589           | 100.00       | 0.100               | 20.7         |
| 3           | ZY-15            | 08:40:36 PM | -13.70        | SR           | -0.0137        | 589           | 100.00       | 0.100               | 20.7         |
| 4           | ZY-15            | 08:40:48 PM | -13.10        | SR           | -0.0131        | 589           | 100.00       | 0.100               | 20.7         |
| 5           | ZY-15            | 08:40:56 PM | -13.10        | SR           | -0.0131        | 589           | 100.00       | 0.100               | 20.7         |

Figure S59. OR report of euphoria E (2)

# NMR, HRESIMS, IR, UV, CD spectra and OR report of compound 3

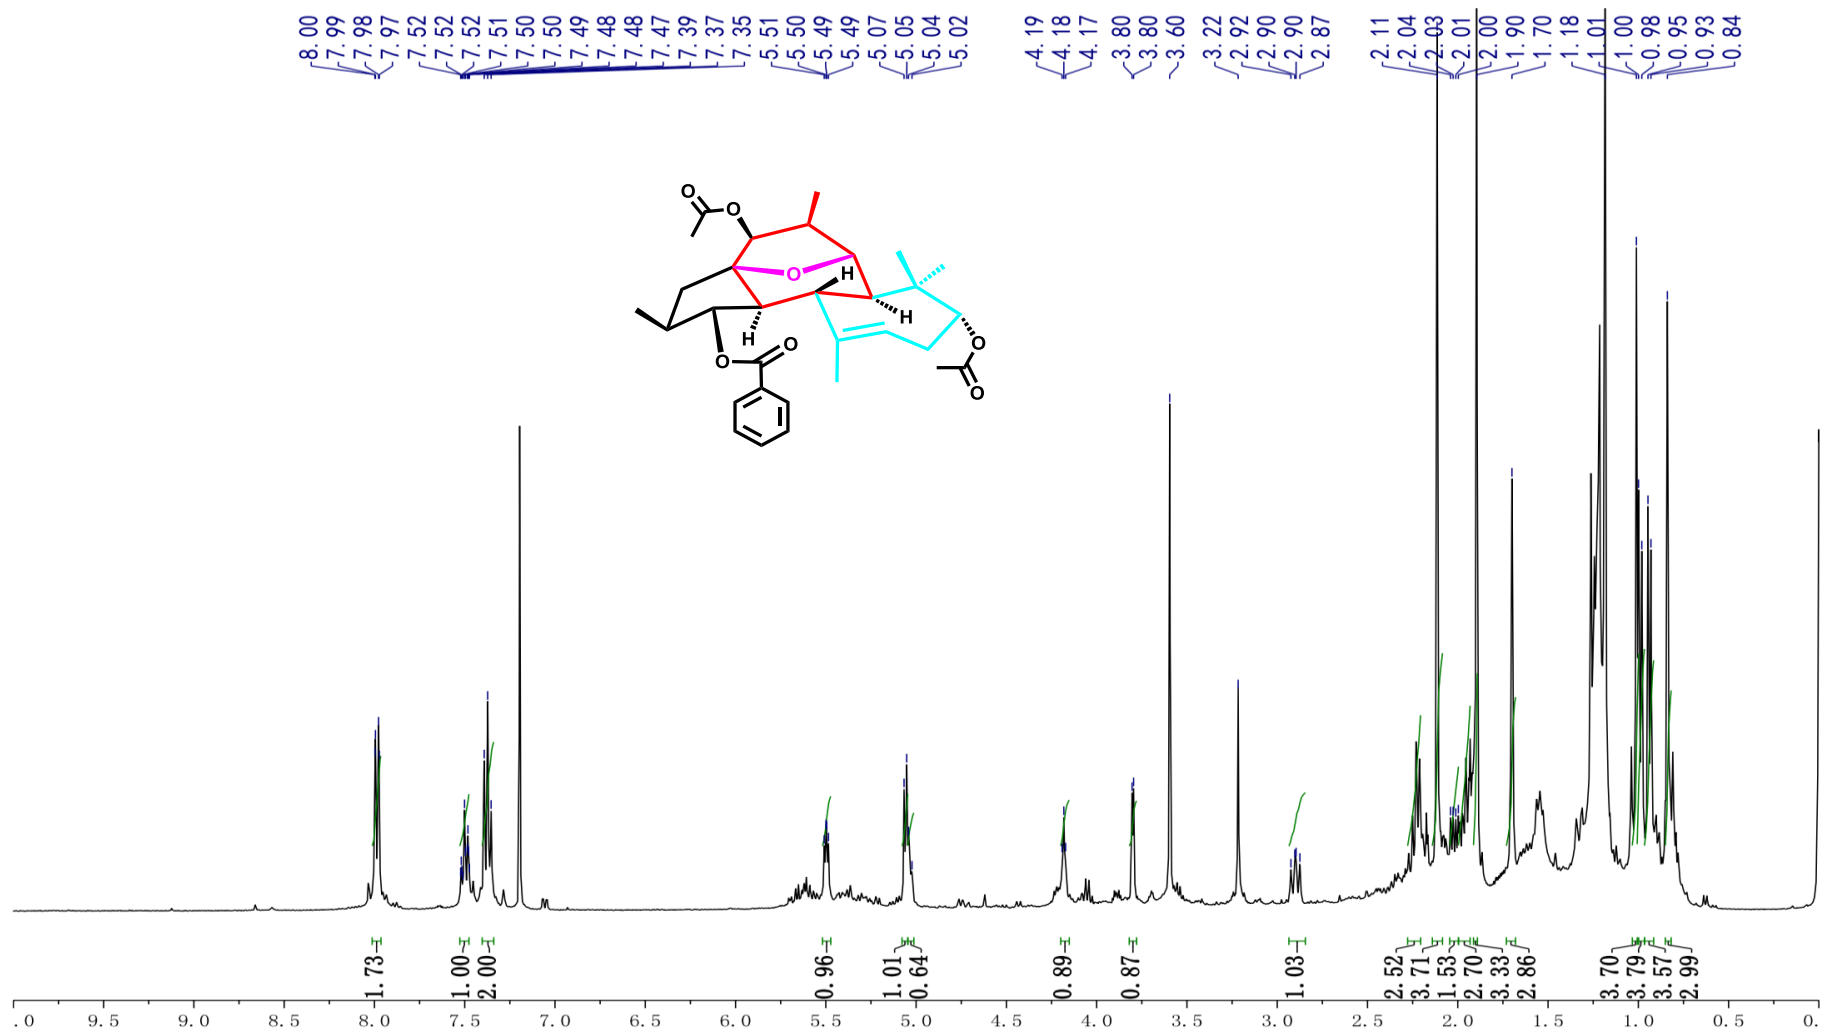

Figure S60. <sup>1</sup>H NMR spectrum of euphoria F (3) in chloroform-d (400 MHz)

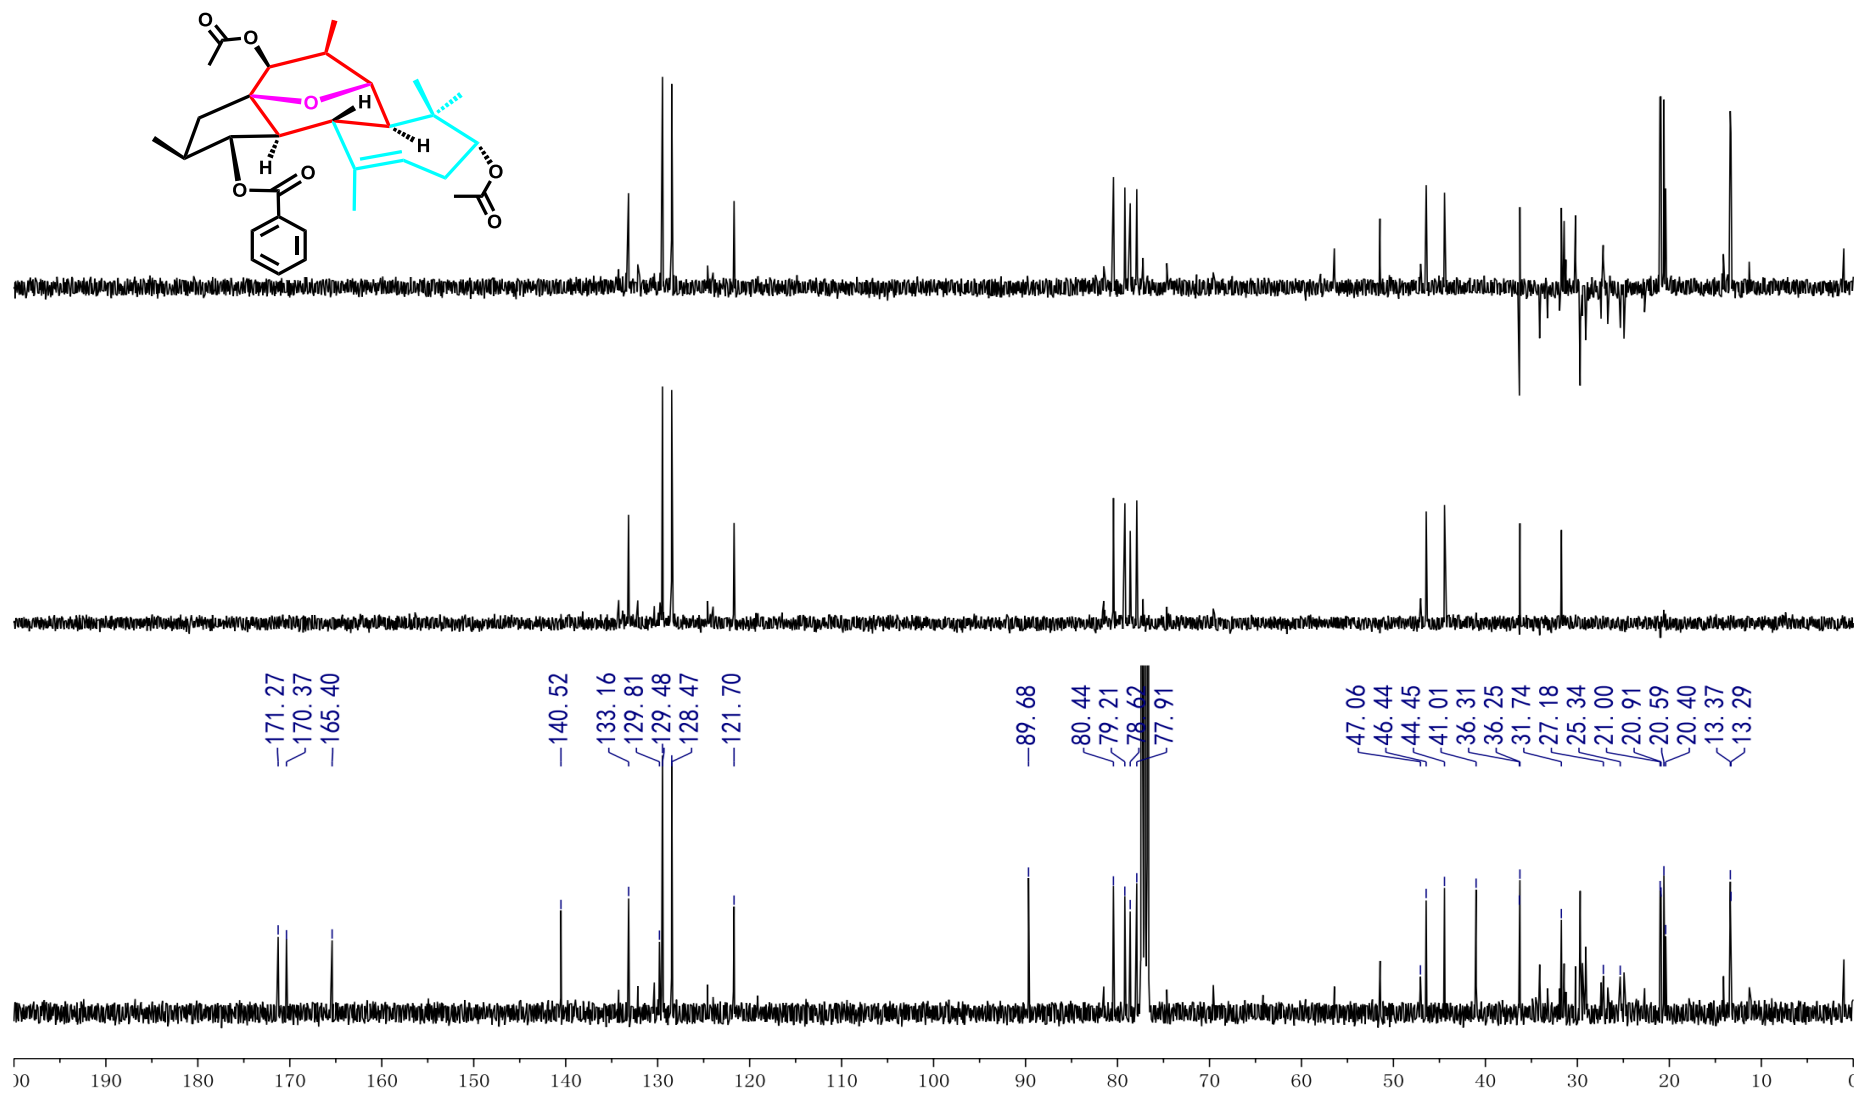

Figure S61.  $^{13}\text{C}$  and DEPT NMR spectra of euphoria F (3) in chloroform-d (100 MHz)

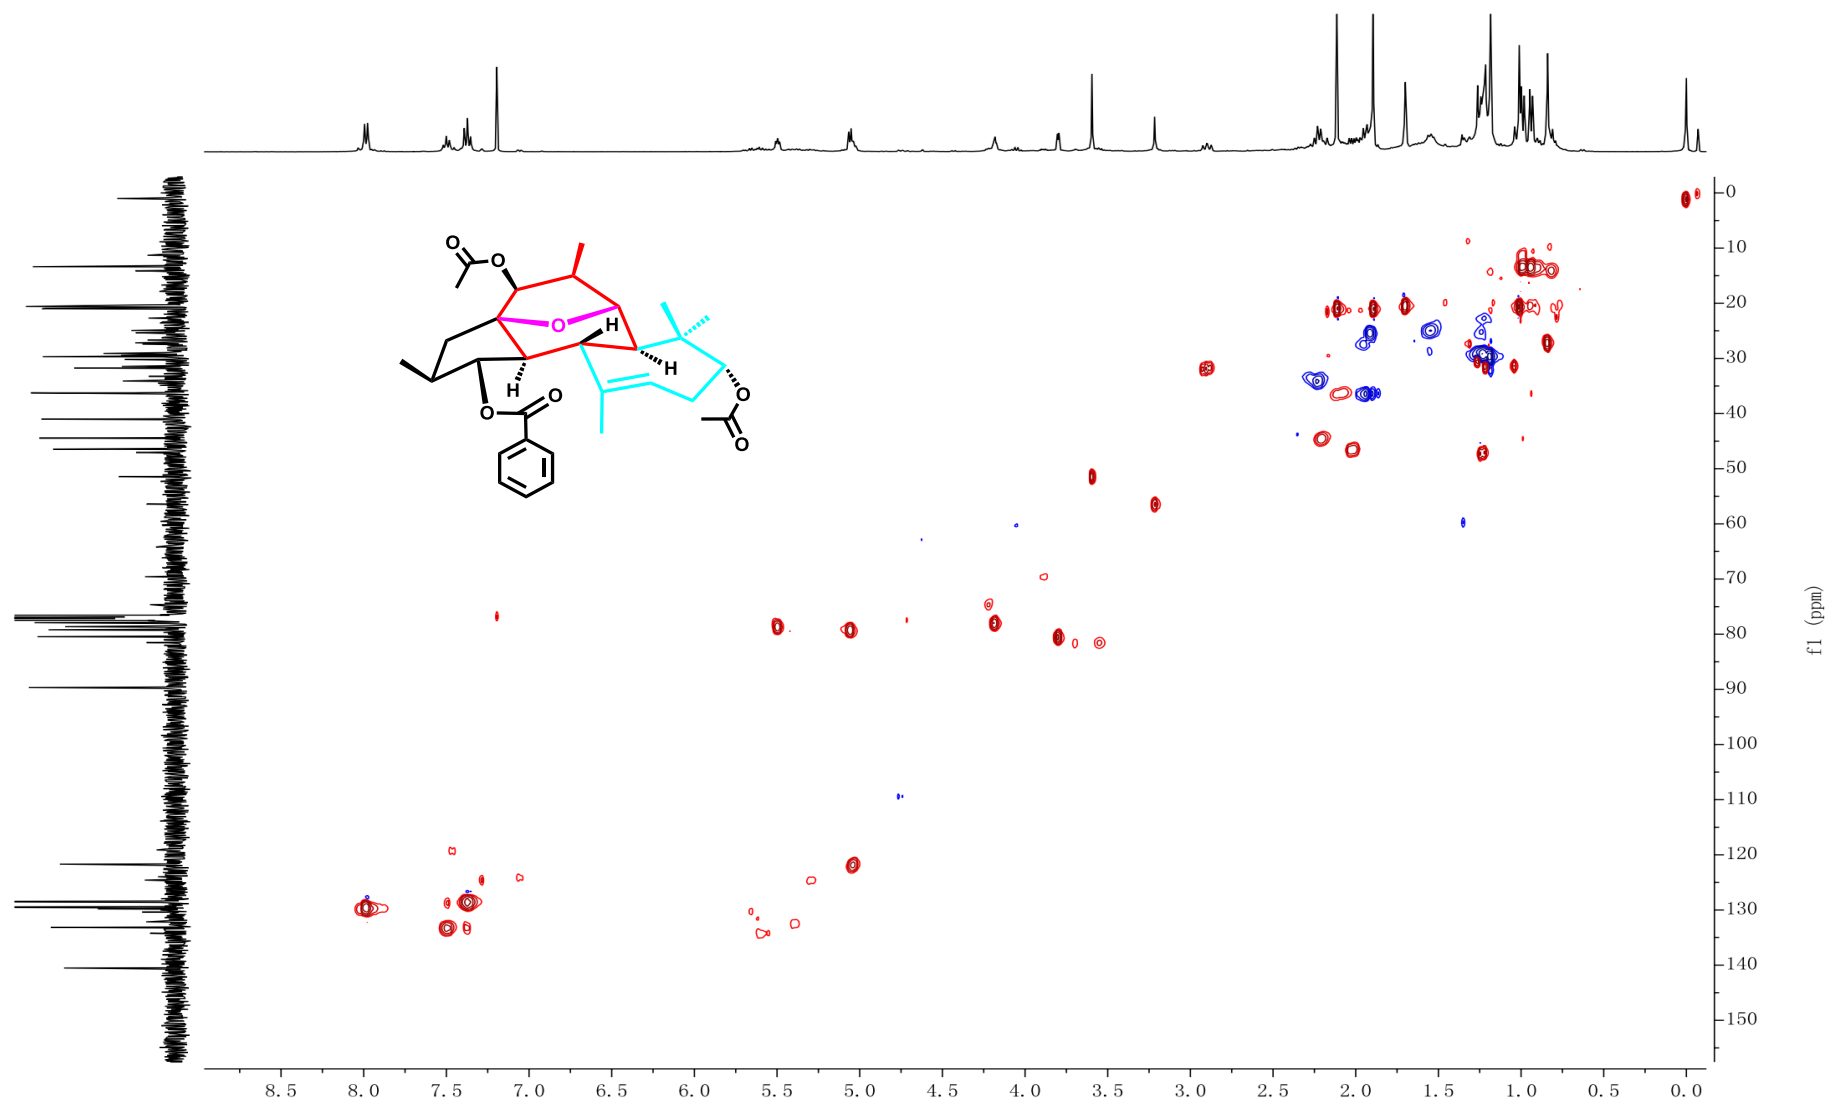

Figure S62. HSQC spectrum of euphoria F (3) in chloroform-d

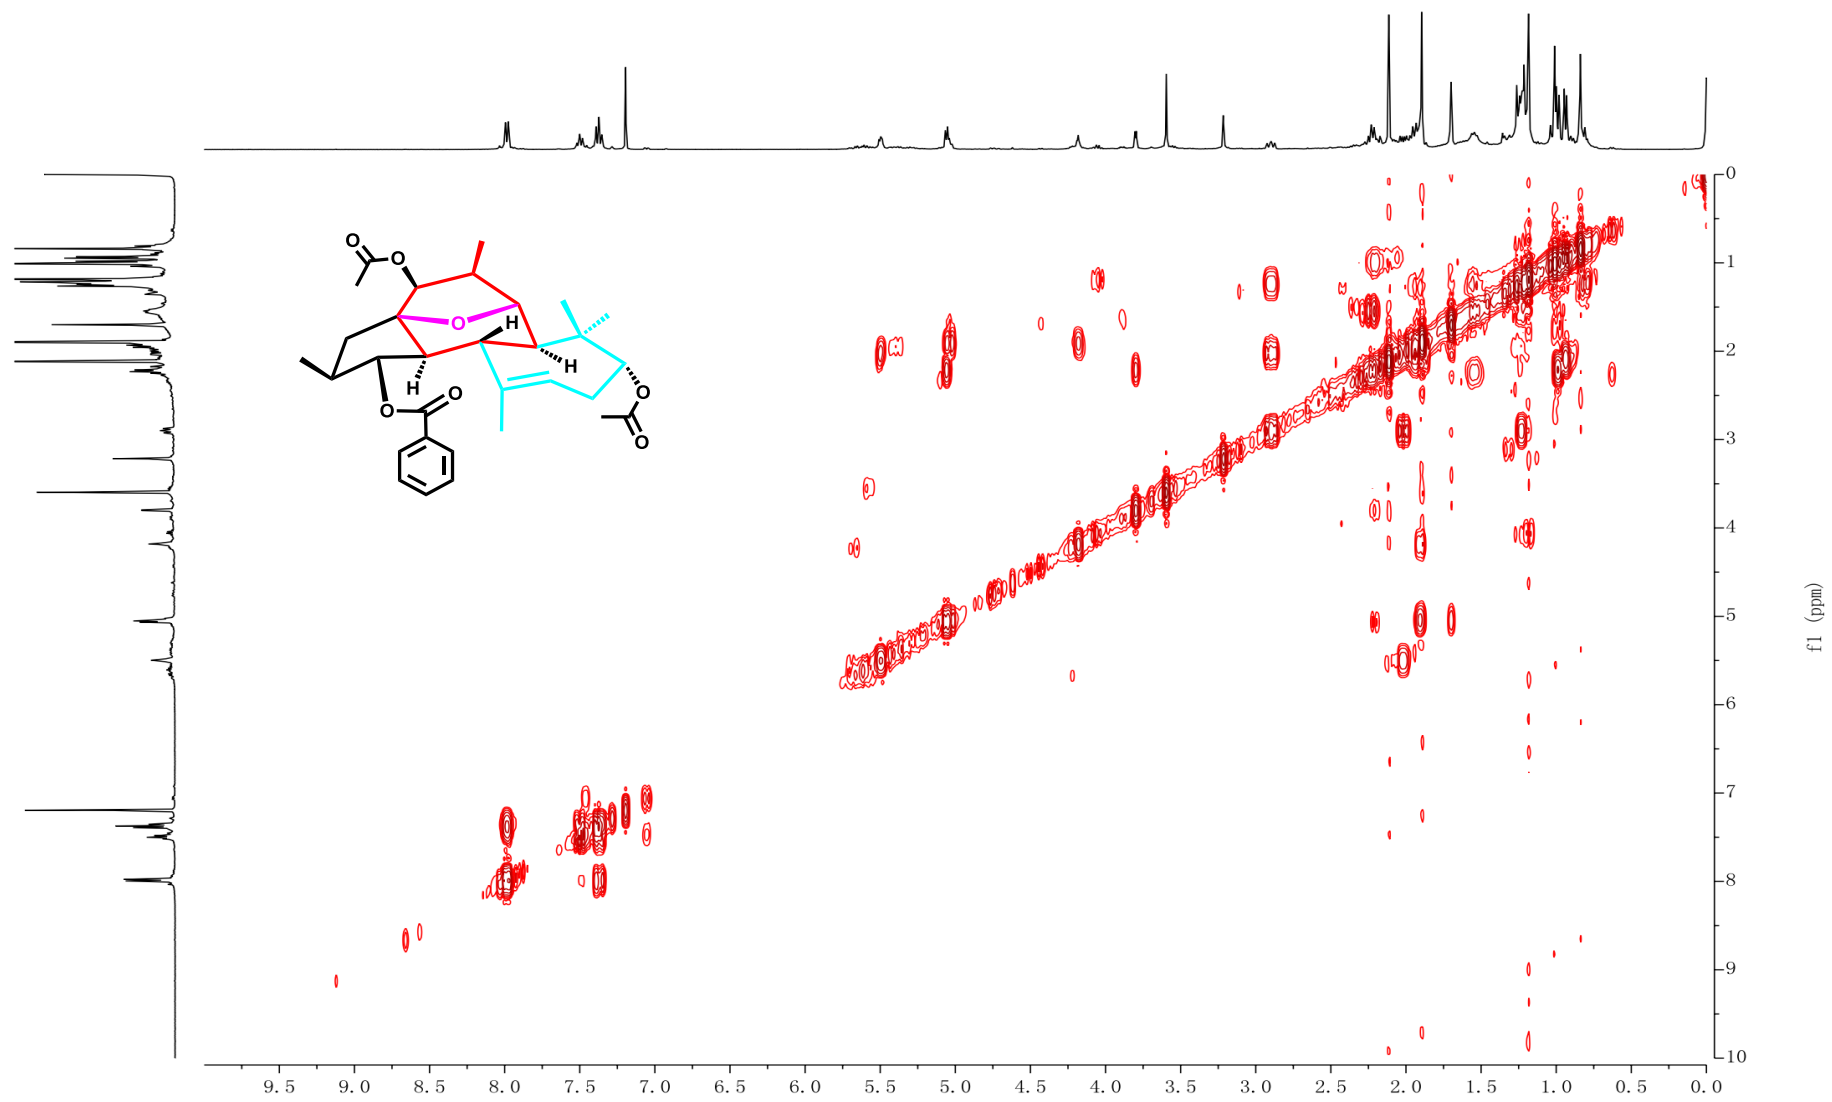

Figure S63.  $^1\text{H}$ - $^1\text{H}$  COSY spectrum of euphoria F (3) in chloroform-d

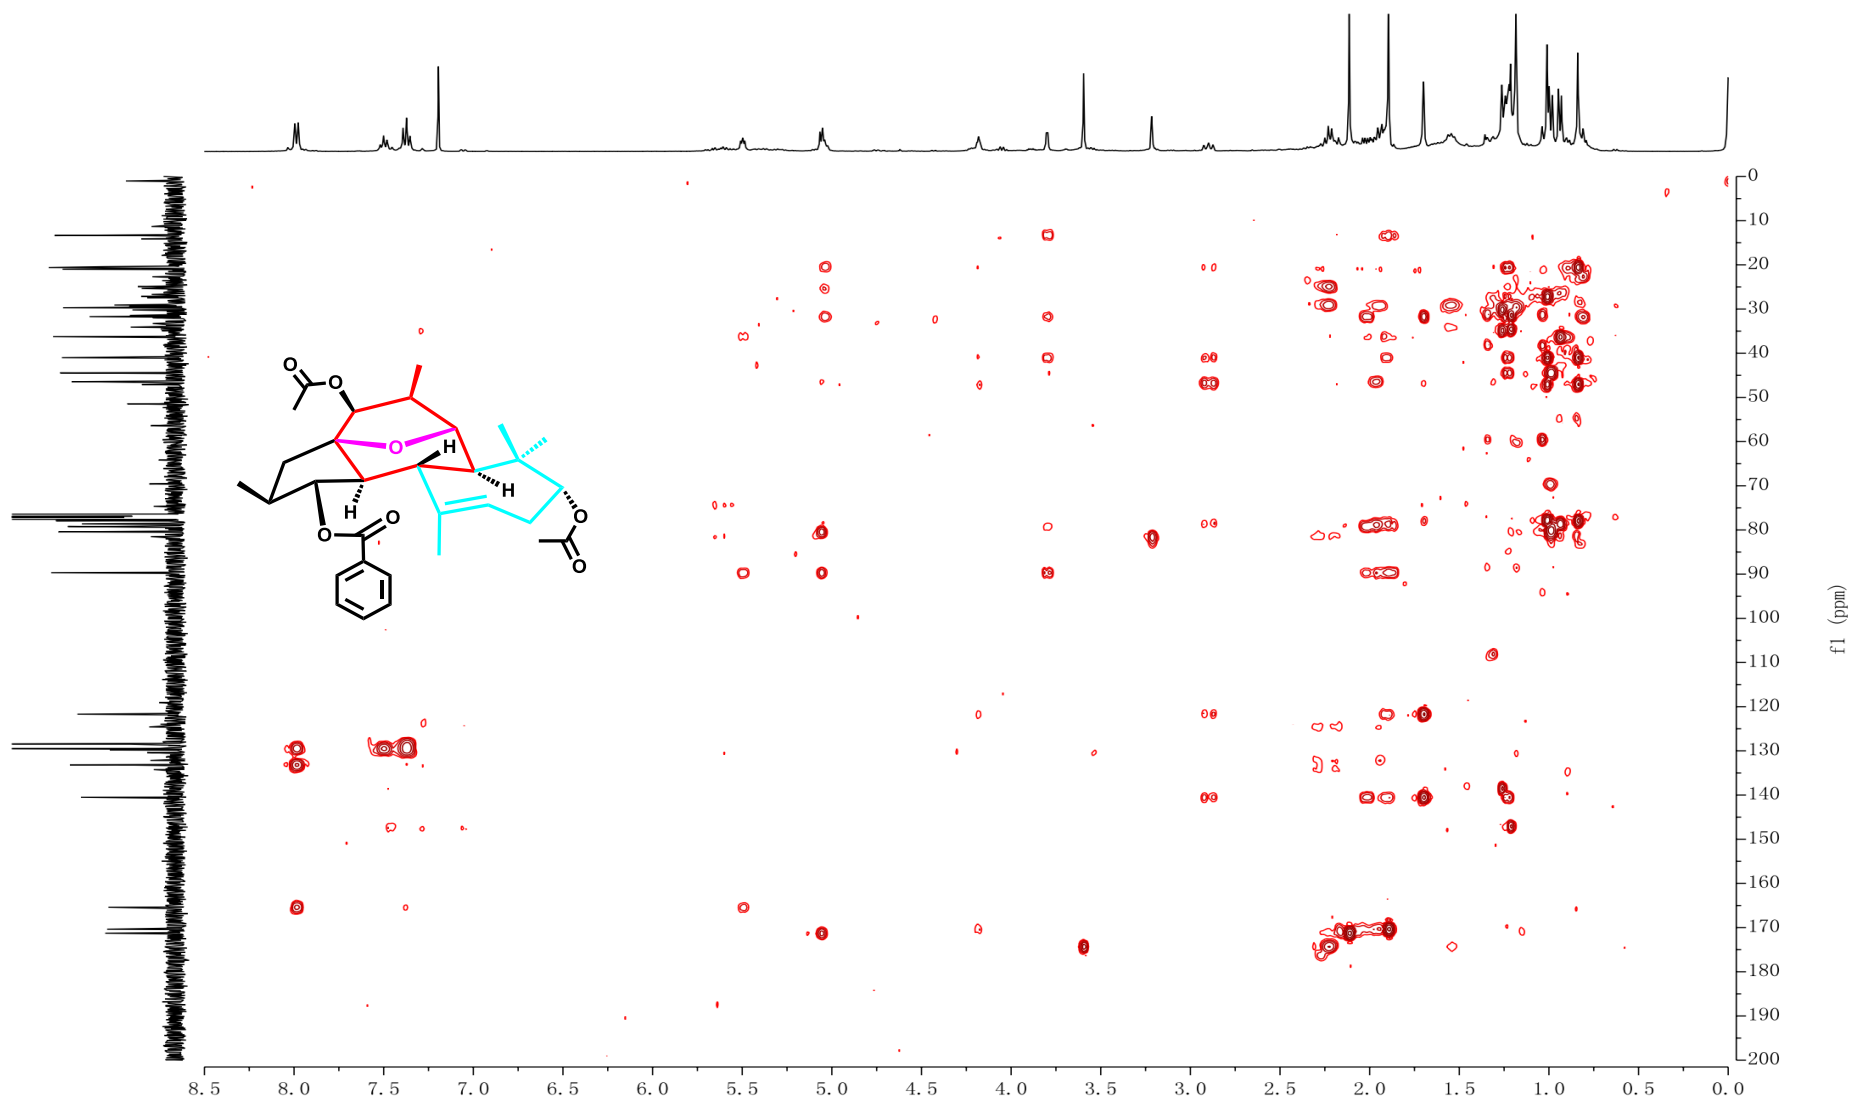

Figure S64. HMBC spectrum of euphopia F (3) in chloroform-d



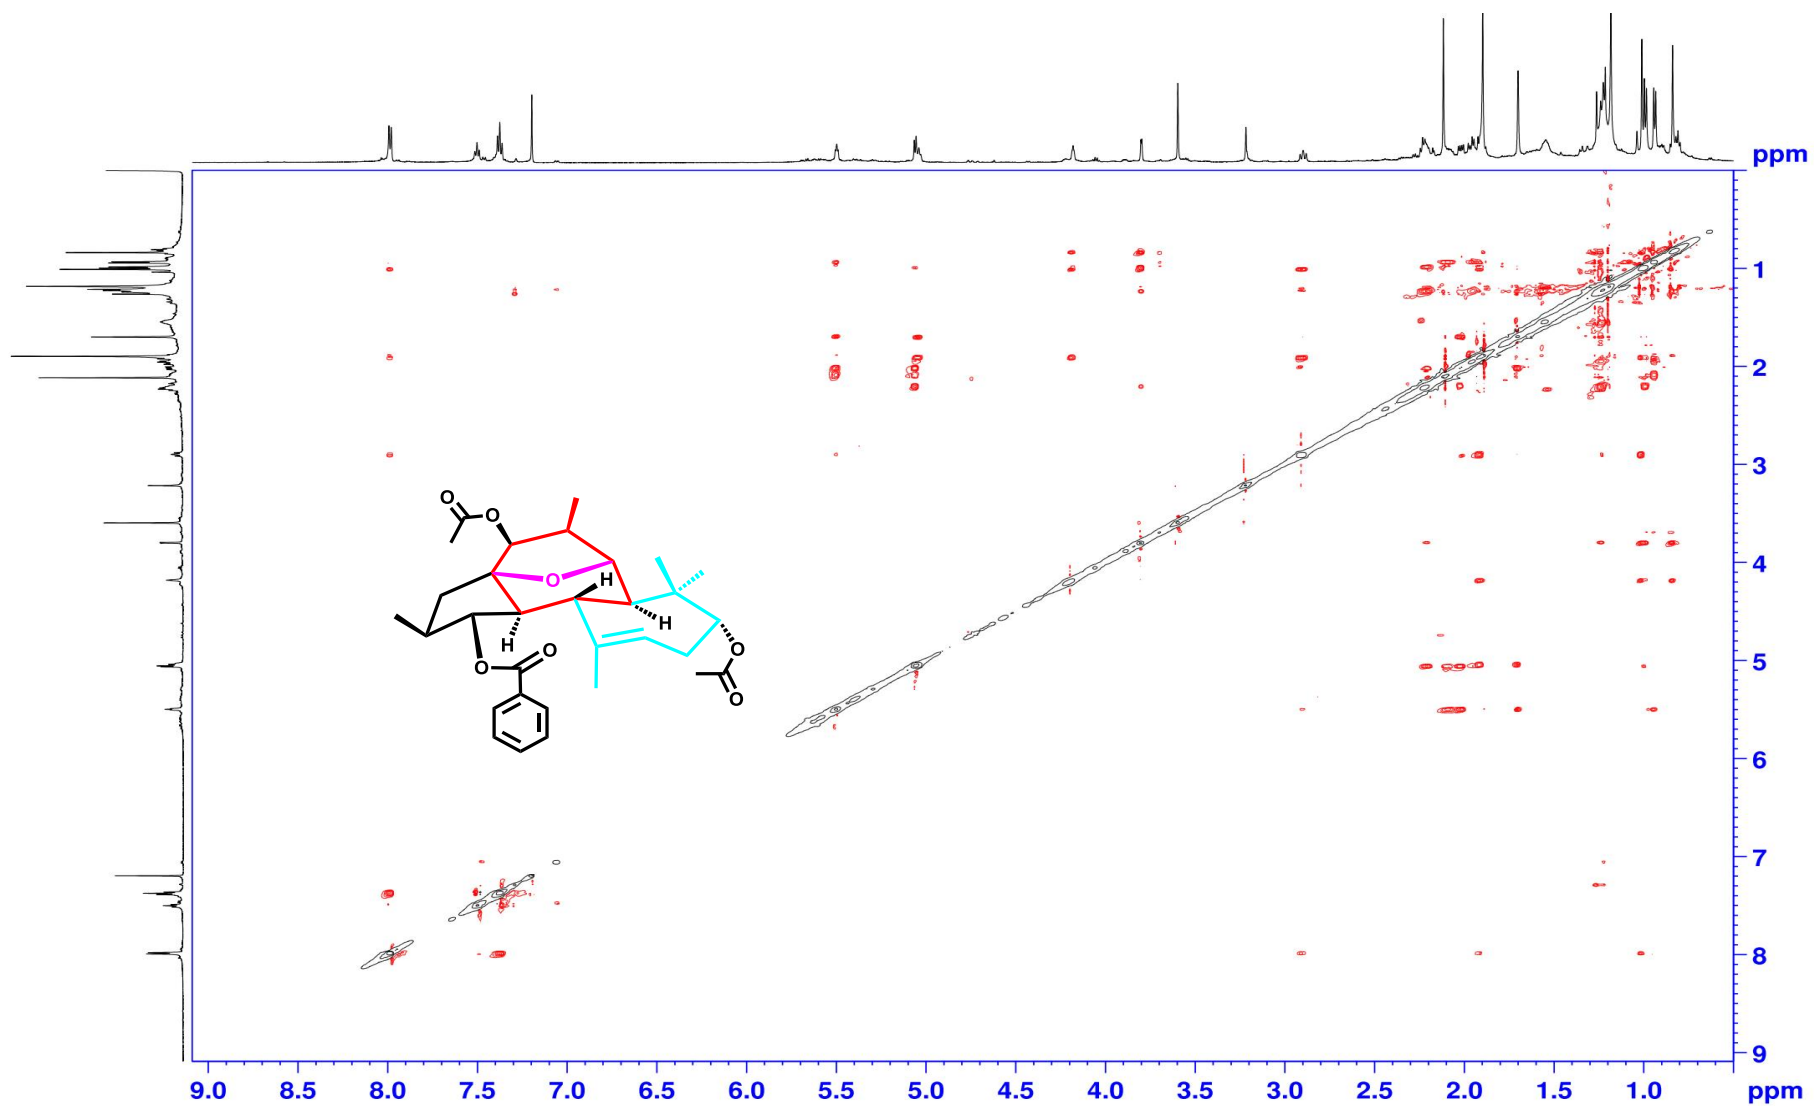

Figure S65. ROESY spectrum of euphopia F (3) in chloroform-d

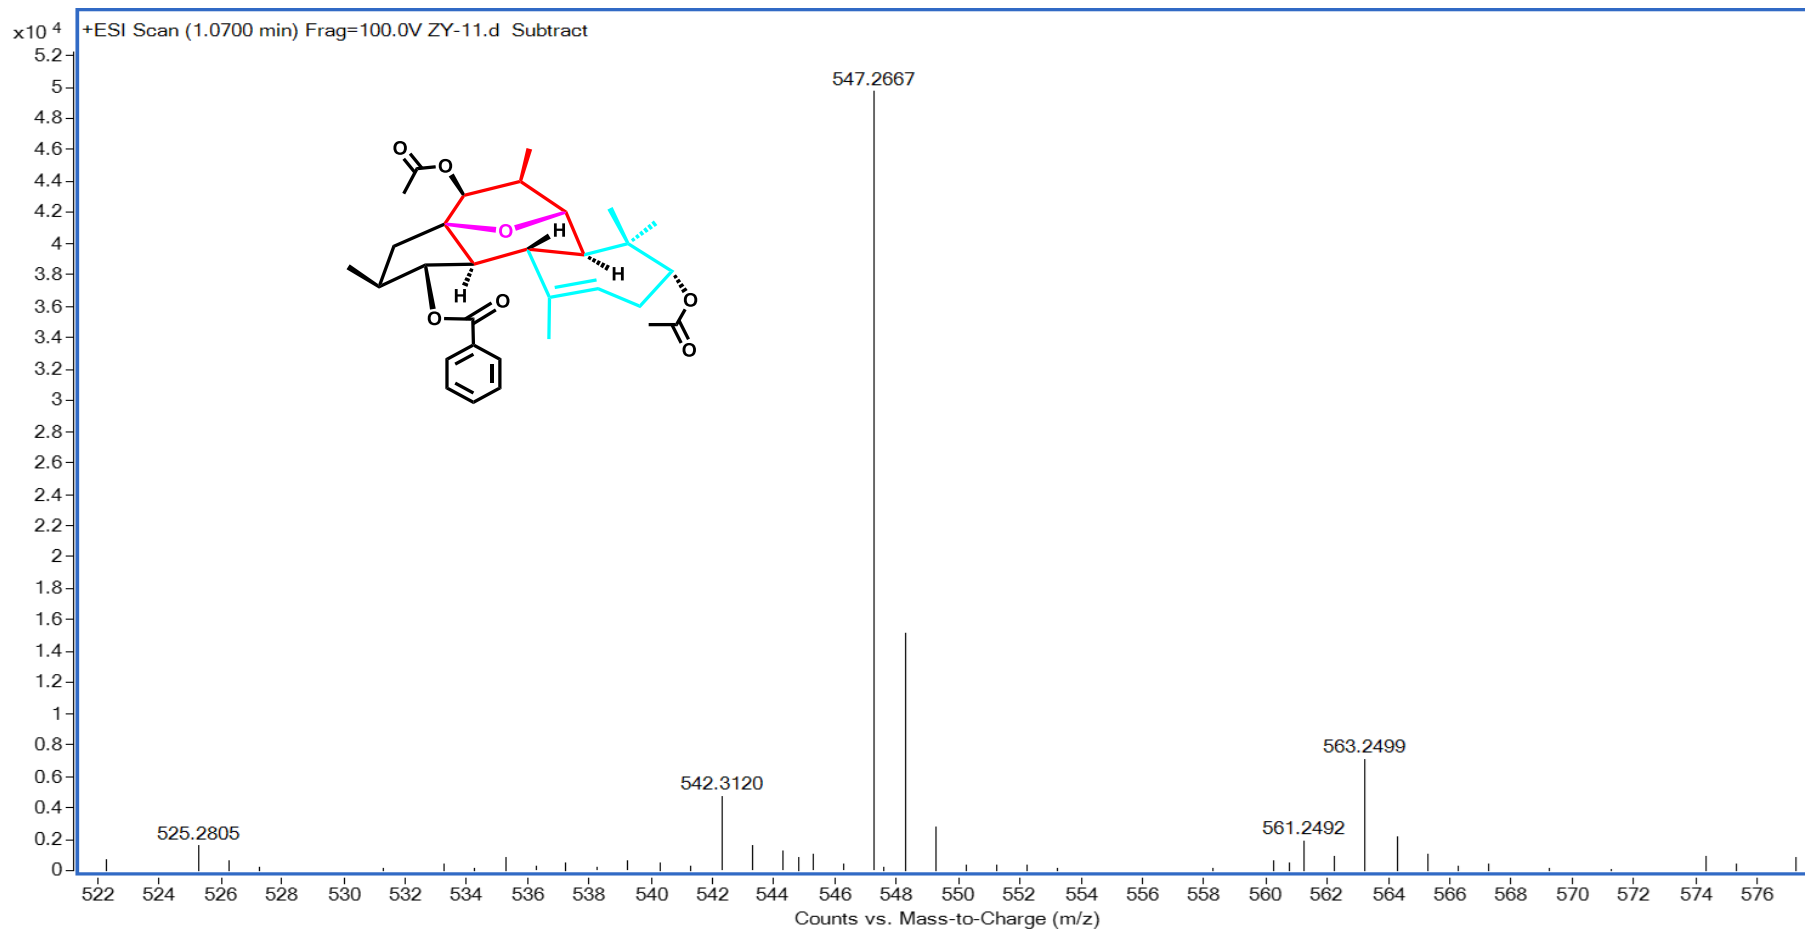

MS Formula Results: + Scan (1.0700 min) Sub (ZY-11.d)

| m/z      | Ion                 | Formula                                          | Abundance |
|----------|---------------------|--------------------------------------------------|-----------|
| 547.2667 | (M+Na) <sup>+</sup> | C <sub>31</sub> H <sub>40</sub> NaO <sub>7</sub> | 49741.1   |

  

| Best                                | Formula (M)                                    | Ion Formula                                      | Score | Cross Score | Calc m/z | Diff (ppm) | Mass Match | Abund Match | Spacing Match |
|-------------------------------------|------------------------------------------------|--------------------------------------------------|-------|-------------|----------|------------|------------|-------------|---------------|
| <input checked="" type="checkbox"/> | C <sub>31</sub> H <sub>40</sub> O <sub>7</sub> | C <sub>31</sub> H <sub>40</sub> NaO <sub>7</sub> | 97.87 |             | 547.2666 | -0.07      | 100        | 93.36       | 99.02         |

Figure S66. HRESIMS spectrum of euphopia F (3)

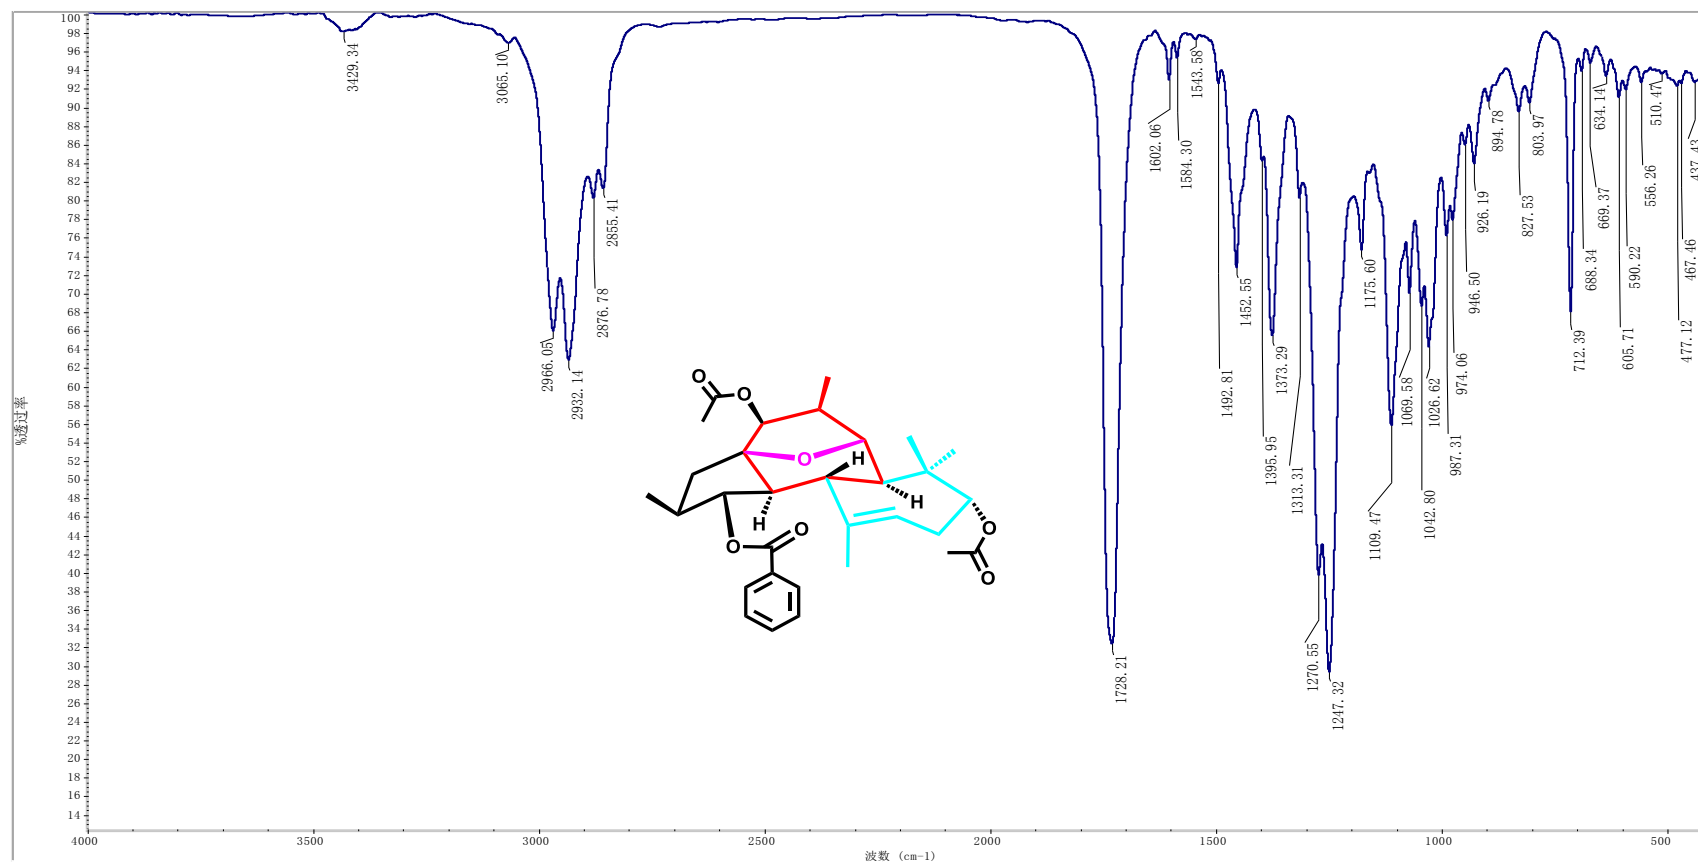

Sample Name: ZY-11

KBr压片

采集时间: 星期二 2月 02 13:24:21 2021 (GMT+08:00)

仪器型号: NICOLET iS10

Software version: OMNIC 9.8.372

样品扫描次数: 16

背景扫描次数: 16

分辨率: 4.000

采样增益: 1.0

动镜速度: 0.4747

光阑: 80.00

Figure S67. IR spectrum of euphoria F (3)

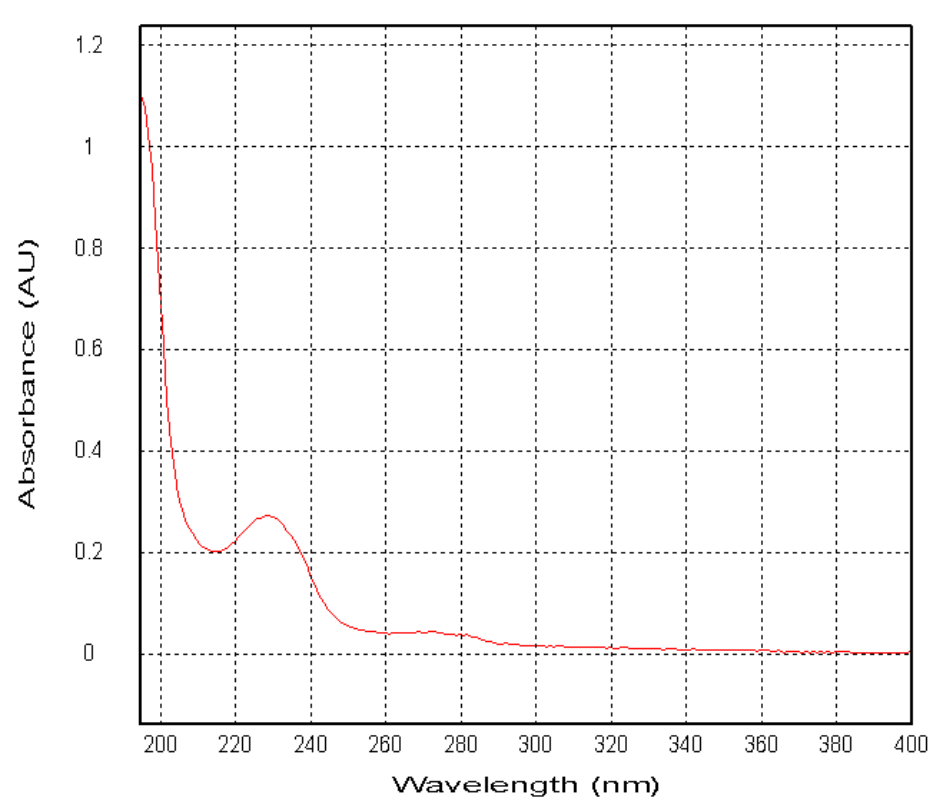

Subtracted:0

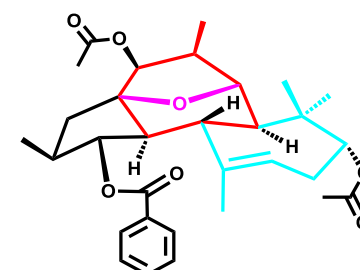

Figure S68. UV spectrum of euphoria F (3)

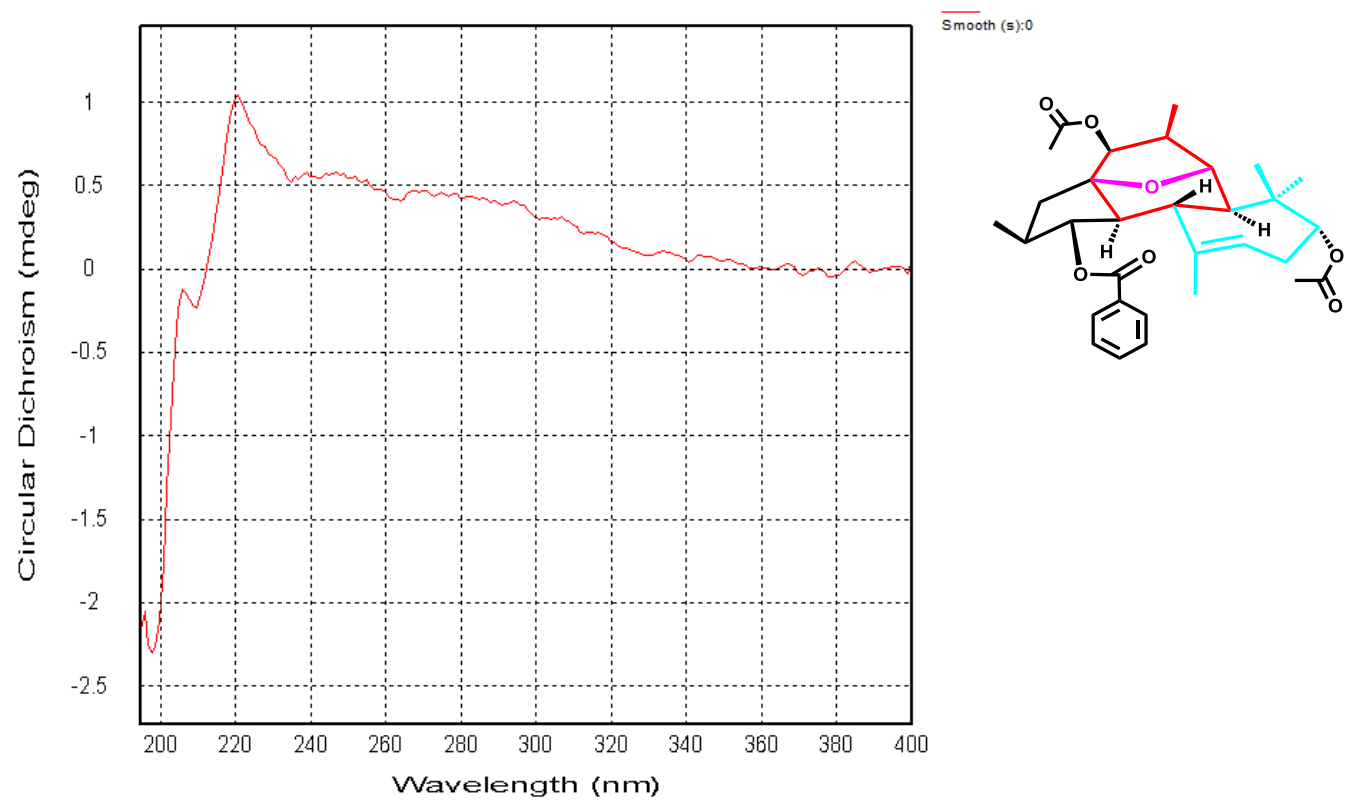

Figure S69. CD spectrum of euphopia F (3)

## Rudolph Research Analytical

This sample was measured on an Autopol VI, Serial #91058  
Manufactured by Rudolph Research Analytical, Hackettstown, NJ, USA.

Measurement Date : Tuesday, 02-FEB-2021

Set Temperature : OFF

Time Delay : Disabled

Delay between Measurement : Disabled

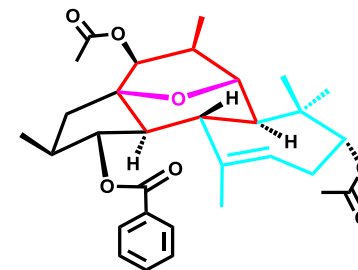

| <u>n</u>    | <u>Average</u>   | <u>Std.Dev.</u> | <u>% RSD</u>  | <u>Maximum</u> | <u>Minimum</u> |               |              |                     |              |  |
|-------------|------------------|-----------------|---------------|----------------|----------------|---------------|--------------|---------------------|--------------|--|
| <u>S.No</u> | <u>Sample ID</u> | <u>Time</u>     | <u>Result</u> | <u>Scale</u>   | <u>OR °Arc</u> | <u>WLG.nm</u> | <u>Lg.mm</u> | <u>Conc.g/100ml</u> | <u>Temp.</u> |  |
| 5           |                  |                 | 6.36          | 0.79           | 12.42          | 7.73          | 5.73         |                     |              |  |
| 1           | ZY-11            | 08:58:27 PM     | 7.73          | SR             | 0.0085         | 589           | 100.00       | 0.110               | 20.3         |  |
| 2           | ZY-11            | 08:58:35 PM     | 5.73          | SR             | 0.0063         | 589           | 100.00       | 0.110               | 20.3         |  |
| 3           | ZY-11            | 08:58:43 PM     | 6.27          | SR             | 0.0069         | 589           | 100.00       | 0.110               | 20.3         |  |
| 4           | ZY-11            | 08:58:51 PM     | 6.09          | SR             | 0.0067         | 589           | 100.00       | 0.110               | 20.3         |  |
| 5           | ZY-11            | 08:59:00 PM     | 6.00          | SR             | 0.0066         | 589           | 100.00       | 0.110               | 20.3         |  |

Figure S70. OR report of euphonia F (3)
